# Supplementary material for: A pyridinium-based strategy for lysine-selective protein modification and chemoproteomic profiling in live cells
Source: Royal Society of Chemistry journal article supplement (doi:10.1039/d3sc05766f), 2024-01-01
Supplement: d3sc05766f2.xlsx [file d3sc05766f2.xlsx]

## Sheet: Table S3
Peptides labeled by KP2 from BSA
Modification Name	Amino Acid	Peptide Sequence	Modified PSMs	Position in proteins
KP2_yne	Y	YNGVFQECCQAEDK	1	184
KP2_yne	Y	RPCFSALTPDETYVPK	1	520
KP2_yne	Y	RHPEYAVSVLLR	2	364
KP2_yne	Y	NYQEAK	1	342
KP2_yne	Y	LGEYGFQNALIVR	4	424
KP2_yne	Y	YLYEIAR	2	163
KP2_yne	Y	HPYFYAPELLYYANK	2	171
KP2_yne	Y	VGTRCCTKPESERMPCTEDYLSLILNR	1	475
KP2_yne	Y	ETYGDMADCCEK	1	108
KP2_yne	Y	YICDNQDTISSK	3	286
KP2_yne	T	QTALVELLK	1	550
KP2_yne	T	TCVADESHAGCEK	2	76
KP2_yne	T	VGTRCCTKPESER	1	458
KP2_yne	T	VGTRCCTKPESER	1	462
KP2_yne	S	SLHTLFGDELCK	1	89
KP2_yne	S	SHCIAEVEK	3	310
KP2_yne	S	SEIAHR	5	29
KP2_yne	S	CASIQK	2	225
KP2_yne	R	RHPYFYAPELLYYANK	1	168
KP2_yne	R	AWSVAR	1	241
KP2_yne	R	CCTESLVNRRPCFSALTPDETYVPK	1	507
KP2_yne	Q	QTALVELLK	2	549
KP2_yne	Q	QNCDQFEK	2	413
KP2_yne	Q	QIKKQTALVELLK	2	545
KP2_yne	Q	YICDNQDTISSK	1	291
KP2_yne	N	CCTESLVNRRPCFSALTPDETYVPK	1	506
KP2_yne	N	YICDNQDTISSK	1	290
KP2_yne	K	EYEATLEECCAKDDPHACYSTVFDK	1	386
KP2_yne	K	TPVSEKVTK	2	495
KP2_yne	K	ALKAWSVAR	30	235
KP2_yne	K	SLHTLFGDELCKVASLR	2	100
KP2_yne	K	LKHLVDEPQNLIK	25	401
KP2_yne	K	LKPDPNTLCDEFK	3	140
KP2_yne	K	AFDEKLFTFHADICTLPDTEK	1	528
KP2_yne	K	LKPDPNTLCDEFKADEK	5	151
KP2_yne	K	LSQKFPK	25	245
KP2_yne	K	LVTDLTKVHK	2	263
KP2_yne	K	SLGKVGTR	5	455
KP2_yne	K	NECFLSHKDDSPDLPK	8	130
KP2_yne	K	AEFVEVTKLVTDLTK	1	256
KP2_yne	K	DDSPDLPKLKPDPNTLCDEFK	2	138
KP2_yne	K	QIKKQTALVELLK	1	547
KP2_yne	K	DDPHACYSTVFDKLK	1	399
KP2_yne	K	DAIPENLPPLTADFAEDKDVCKNYQEAK	2	340
KP2_yne	K	ADLAKYICDNQDTISSK	1	285
KP2_yne	K	RDTHKSEIAHR	1	28
KP2_yne	K	ADEKKFWGK	2	156
KP2_yne	K	DAIPENLPPLTADFAEDKDVCK	3	336
KP2_yne	K	ADEKKFWGK	1	155
KP2_yne	K	LKECCDKPLLEK	12	299
KP2_yne	K	VHKECCHGDLLECADDRADLAK	3	266
KP2_yne	K	ATEEQLKTVMENFVAFVDK	2	568
KP2_yne	K	CCTKPESER	4	463
KP2_yne	K	FPKAEFVEVTK	3	248
KP2_yne	K	FWGKYLYEIAR	1	160
KP2_yne	K	GACLLPKIETMR	2	204
KP2_yne	K	HKPKATEEQLK	7	561
KP2_yne	K	ETYGDMADCCEKQEPER	3	117
KP2_yne	K	YICDNQDTISSKLK	2	297
KP2_yne	K	CCAADDKEACFAVEGPK	2	587
KP2_yne	K	LFTFHADICTLPDTEKQIK	1	544
KP2_yne	K	CASIQKFGER	7	228
KP2_yne	K	HLVDEPQNLIKQNCDQFEK	4	412
KP2_yne	K	KQTALVELLK	12	548
KP2_yne	K	KQTALVELLKHKPK	5	559
KP2_yne	K	KQTALVELLKHKPK	4	557
KP2_yne	K	KVPQVSTPTLVEVSR	7	437
KP2_yne	K	LAKEYEATLEECCAK	15	374
KP2_yne	K	ECCDKPLLEKSHCIAEVEK	2	309
KP2_yne	K	TPVSEKVTKCCTESLVNR	1	498
KP2_yne	K	LCVLHEKTPVSEK	4	489
KP2_yne	K	HPYFYAPELLYYANKYNGVFQECCQAEDK	1	183
KP2_yne	H	HLVDEPQNLIK	2	402
KP2_yne	H	HKPKATEEQLK	6	558
KP2_yne	H	HPEYAVSVLLR	2	361
KP2_yne	E	VGTRCCTKPESERMPCTEDYLSLILNR	1	465
KP2_yne	E	IETMREK	1	206
KP2_yne	E	RPCFSALTPDETYVPKAFDEK	1	518
KP2_yne	E	CCTKPESERMPCTEDYLSLILNR	1	467
KP2_yne	E	CCTKPESERMPCTEDYLSLILNR	1	473
KP2_yne	E	LKECCDKPLLEK	3	300
KP2_yne	E	LCVLHEK	1	488
KP2_yne	E	HLVDEPQNLIK	1	406
KP2_yne	D	DTHKSEIAHR	6	25
KP2_yne	D	VHKECCHGDLLECADDR	2	272
KP2_yne	D	VGTRCCTKPESERMPCTEDYLSLILNR	1	474
KP2_yne	D	RPCFSALTPDETYVPKAFDEK	1	526
KP2_yne	D	HLVDEPQNLIK	1	405
KP2_yne	D	LKECCDKPLLEK	2	303
KP2_yne	D	ADEKKFWGK	2	153
KP2_yne	C	GACLLPKIETMR	1	200
KP2_yne	C	VGTRCCTKPESER	1	461
KP2_yne	C	LKECCDKPLLEK	1	302
KP2_yne	C	EYEATLEECCAK	2	383
KP2_yne	C	VTKCCTESLVNR	1	500
KP2_yne	C	LKPDPNTLCDEFKADEK	2	147
KP2_yne	C	MPCTEDYLSLILNR	3	471
KP2_yne	C	CCTKPESER	1	460
KP2_yne	C	LCVLHEK	4	484

## Sheet: Table S4-MCF-7
4545 Modified Lysine sites by 100 mM KP2 from MCF-7 cell lysates
Position in Peptide	Peptide Sequence	Modified PSMs	Protein Accession	Gene symbol	Position	Motif
9	AFNQGKIFK	1	P26641	EEF1G	437	NQGKIFk------
6	FYFWTK	2	P51970	NDUFA8	172	RFYFWTk------
9	ETAAACVEK	2	Q15631	TSN	228	AAACVEk------
17	AQLGGPEAAKSDETAAK	4	P04792	HSPB1	205	SDETAAk------
8	YFEKAGLK	1	P25815	S100P	95	FEKAGLk------
11	GNGIVECLGPK	1	Q9UBE0	SAE1	346	VECLGPk------
16	GDSVIVVLRNPLIAGK	1	P62316	SNRPD2	118	NPLIAGk------
10	AQTMSNSGIK	2	Q12904	AIMP1	312	MSNSGIk------
11	ASTSKSESSQK	1	P62753	RPS6	249	KSESSQk------
8	AEGAGDAK	1	P05204	HMGN2	90	EGAGDAk------
8	LYEQLSGK	1	P30086	PEBP1	187	YEQLSGk------
1	KVHGSLAR	2	P62861	FAU	1	------kVHGSLA
14	WFQQKYDGIILPGK	1	P62913	RPL11	178	GIILPGk------
8	SHPPPPEK	1	A0A0U1RRE5	NBDY	68	HPPPPEk------
10	KNPAAYENDK	1	O14949	UQCRQ	82	AAYENDk------
15	VYLLYRPGHYDILYK	1	Q96FW1	OTUB1	271	HYDILYk------
9	SMPEQTGEK	3	P62888	RPL30	115	PEQTGEk------
9	KENQWCEEK	1	P63208	SKP1	163	NQWCEEk------
9	KAGIFQSVK	1	P09669	COX6C	75	GIFQSVk------
8	NFRNPLAK	3	P06733	ENO1	434	FRNPLAk------
8	MQSLSLNK	1	Q13442	PDAP1	181	QSLSLNk------
2	MKDSLVLLGR	1	O76071	CIAO1	2	-----MkDSLVLL
6	EALQQKQ	1	Q9Y333	LSM2	94	-----KEALQQkQ
7	VAQATCKL	1	P35914	HMGCL	324	-----VAQATCkL
6	IFGINKY	1	Q8N138	ORMDL3	152	-----RIFGINkY
10	GSGGFGSTGKN	1	P33316	DUT	251	-----GFGSTGkN
11	VVDLMAHMASKE	4	P04406	GAPDH	334	-----MAHMASkE
2	MKIEEVK	3	Q9Y265	RUVBL1	2	-----MkIEEVKS
9	LAQNPLFWKT	2	Q53FT3	HIKESHI	196	-----QNPLFWkT
2	MKPDETPMFDPSLLK	1	Q96EK6	GNPNAT1	2	-----MkPDETPM
7	AGMSSLKG	1	P40227	CCT6A	530	-----AGMSSLkG
2	MKQEGSAR	1	O43242	PSMD3	2	-----MkQEGSAR
2	MKFNPFVTSDR	9	P61254	RPL26	2	-----MkFNPFVT
11	ASAPESGLLSKV	4	Q96CN7	ISOC1	297	-----ESGLLSkV
12	LQNLQLQPGNAKL	1	P22307	SCP2	546	-----LQPGNAkL
2	MKLTDSVLR	1	Q6UXN9	WDR82	2	-----MkLTDSVL
11	IEVEKPFAIAKE	1	P23284	PPIB	215	-----KPFAIAkE
3	MDKNELVQKAK	3	P63104	YWHAZ	3	----MDkNELVQK
3	MAKVEQVLSLEPQHELK	1	O95292	VAPB	3	----MAkVEQVLS
10	LAKADGIVSKNF	1	P63220	RPS21	81	ADGIVSkNF----
14	DLDRIAGQVAAANKK	1	P39019	RPS19	143	QVAAANkKH----
5	LKELKDQ	2	P61513	RPL37A	90	RRLKELkDQ----
3	MIKLFSLK	2	P61081	UBE2M	3	----MIkLFSLKQ
3	MAKHHPDLIFCR	1	Q7RTV0	PHF5A	3	----MAkHHPDLI
5	FVDSKSG	1	O75390	CS	464	MKFVDSkSG----
6	DIGFIKLD	5	P62273	RPS29	54	KDIGFIkLD----
3	MSKAHPPELK	2	P62308	SNRPG	3	----MSkAHPPEL
3	MSKNTVSSAR	2	O15511	ARPC5	3	----MSkNTVSSA
3	MPKPINVR	5	P35241	RDX	3	----MPkPINVRV
12	LGGSAVISLEGKPL	3	P23528	CFL1	164	VISLEGkPL----
3	MPKPINVR	5	P15311	EZR	3	----MPkPINVRV
3	MSKGPAVGIDLGTTYSCVGVFQHGK	1	P11142	HSPA8	3	----MSkGPAVGI
3	MEKLAASTEPQGPRPVLGR	3	Q9Y365	STARD10	3	----MEkLAASTE
3	MSKSFQQSSLSR	1	P43243	MATR3	3	----MSkSFQQSS
3	MEKTLETVPLER	2	P22626	HNRNPA2B1	3	----MEkTLETVP
6	TLSMDKGF	1	P17858	PFKL	778	RTLSMDkGF----
3	MAKWGEGDPR	1	O95433	AHSA1	3	----MAkWGEGDP
3	MVKETTYYDVLGVKPNATQEELKK	1	P31689	DNAJA1	3	----MVkETTYYD
3	MDKDCEMKR	1	P16455	MGMT	3	----MDkDCEMKR
5	EYFSKQK	2	Q06830	PRDX1	197	SKEYFSkQK----
5	AFLEKAH	1	P24666	ACP1	156	CRAFLEkAH----
7	EVAPVPKIH	1	Q15274	QPRT	295	EVAPVPkIH----
3	MAKPCGVR	1	Q9UL46	PSME2	3	----MAkPCGVRL
3	MAKISSPTETER	2	P31949	S100A11	3	----MAkISSPTE
11	TLRPALVGVVKEA	1	Q9HAV7	GRPEL1	215	ALVGVVkEA----
3	MSKPHSEAGTAFIQTQQLHAAMADTFLEHMCR	5	P14618	PKM	3	----MSkPHSEAG
3	MEKTELIQK	2	P27348	YWHAQ	3	----MEkTELIQK
3	MSKSESPKEPEQLR	1	P09651	HNRNPA1	3	----MSkSESPKE
5	KANFKDQ	1	P30084	ECHS1	288	KRKANFkDQ----
3	MGKDYYQTLGLAR	2	P25685	DNAJB1	3	----MGkDYYQTL
4	MCDKEFMWALK	2	P58546	MTPN	4	---MCDkEFMWAL
6	AFNQGKIFK	1	P26641	EEF1G	434	KAFNQGkIFK---
19	GVNTGAVGSYIYDRDPEGK	1	P52943	CRIP2	205	DRDPEGkVQP---
4	MVAKQR	1	Q8N6R1	SERP2	4	---MVAkQRIRMA
7	LVLDSVKLEA	1	O75347	TBCA	105	LVLDSVkLEA---
4	MEVKPPPGRPQPDSGR	2	P51991	HNRNPA3	4	---MEVkPPPGRP
6	ALKLLKTEL	1	O95994	AGR2	172	KALKLLkTEL---
5	EWTQKYAM	2	P61077	UBE2D3	144	SREWTQkYAM---
13	SVFALTNGIYPHKLVF	1	Q02878	RPL6	285	NGIYPHkLVF---
4	MAPKFPDSVEELR	1	Q15785	TOMM34	4	---MAPkFPDSVE
4	MDSKYQCVK	2	P52895	AKR1C2	4	---MDSkYQCVKL
1	KISGGSVVEMQGDEMTR	1	O75874	IDH1	4	---MSKkISGGSV
3	VNKCAL	1	Q6IA86	ELP2	823	KIHRVNkCAL---
4	MAGKQAVSASGK	2	P14927	UQCRB	4	---MAGkQAVSAS
4	MALKQISSNK	1	P10768	ESD	4	---MALkQISSNK
7	MAQWGNKPVC	1	P21266	GSTM3	222	MAQWGNkPVC---
4	MSSKTASTNNIAQAR	1	Q9UBI6	GNG12	4	---MSSkTASTNN
7	KGEDFVKTLK	1	P40926	MDH2	335	KGEDFVkTLK---
4	MSEKSGQSTK	1	Q9Y520	PRRC2C	4	---MSEkSGQSTK
5	EWTQKYAM	1	P62837	UBE2D2	144	AREWTQkYAM---
5	IEHSKLLE	1	Q8WWC4	MAIP1	288	ARIEHSkLLE---
4	MAAKVFESIGK	3	P35232	PHB1	4	---MAAkVFESIG
4	MSDKSELKAELER	1	Q13409	DYNC1I2	4	---MSDkSELKAE
1	KFQGENTK	1	Q96CT7	CCDC124	4	---MPKkFQGENT
4	MPQKDPCQK	1	P56277	CMC4	4	---MPQkDPCQKQ
1	KIEEIKDFLLTAR	10	P63173	RPL38	4	---MPRkIEEIKD
10	QSLPPGLAVKELK	2	P63173	RPL38	67	PPGLAVkELK---
13	SCENLAPFNTALKLLK	2	Q13155	AIMP2	317	PFNTALkLLK---
4	MSNKEGSGGFR	1	Q99598	TSNAX	4	---MSNkEGSGGF
11	LQAAVDGPMDKKEE	2	P51572	BCAP31	243	VDGPMDkKEE---
1	KDAATIKLPVDQYR	1	Q629K1	TRIQK	4	---MGRkDAATIK
4	MDSKHQCVK	1	P42330	AKR1C3	4	---MDSkHQCVKL
8	YKEETIEKMQE	1	P61254	RPL26	142	KEETIEkMQE---
9	ALQLSEPGKEIH	1	Q9H061	TMEM126A	192	QLSEPGkEIH---
4	MAAKSQPNIPK	1	Q9UBM7	DHCR7	4	---MAAkSQPNIP
7	FAQIVQKGGQ	1	Q9Y5J9	TIMM8B	80	---FAQIVQkGGQ
10	ATVNLLGEEKK	1	Q00765	REEP5	186	NLLGEEkKST---
4	MPSKGPLQSVQVFGR	2	P62249	RPS16	4	---MPSkGPLQSV
3	YQKSYR	1	P62249	RPS16	143	ARARYQkSYR---
7	RTQAPTKASE	1	P47914	RPL29	156	RTQAPTkASE---
5	MASNKTTLQK	1	Q13185	CBX3	5	--MASNkTTLQKM
5	MAAVKDSCGK	2	P61758	VBP1	5	--MAAVkDSCGKG
5	MAGGKAGKDSGK	1	Q71UI9	H2AZ2	5	--MAGGkAGKDSG
5	MADGKAGDEKPEK	1	Q8WW12	PCNP	5	--MADGkAGDEKP
5	MADPKYADLPGIAR	1	Q13561	DCTN2	5	--MADPkYADLPG
5	MAAYKLVLIR	5	P18669	PGAM1	5	--MAAYkLVLIRH
5	MNQEKLAKLQAQVR	1	Q96K17	BTF3L4	5	--MNQEkLAKLQA
5	MVMEKPSPLLVGR	1	Q13283	G3BP1	5	--MVMEkPSPLLV
5	MAGEKVEKPDTK	6	Q02878	RPL6	5	--MAGEkVEKPDT
1	KFADGEVVR	1	Q14739	LBR	5	--MPSRkFADGEV
1	KQTPSDFLK	1	P62312	LSM6	5	--MSLRkQTPSDF
8	MLAQQAVKR	1	P04844	RPN2	627	LAQQAVkRTAH--
8	TGCTFPEKPDFH	1	P55263	ADK	358	GCTFPEkPDFH--
5	MSIEKIWAR	1	P09104	ENO2	5	--MSIEkIWAREI
1	KVSSAEGAAK	1	P05114	HMGN1	5	--MPKRkVSSAEG
2	VKVGVNGFGR	1	P04406	GAPDH	5	--MGKVkVGVNGF
1	KEGTGSTATSSSSTAGAAGK	2	O15372	EIF3H	5	--MASRkEGTGST
5	MSEEKPKEGVK	4	P55854	SUMO3	5	--MSEEkPKEGVK
10	KQELLEALTKHFQD	1	P12956	XRCC6	605	LLEALTkHFQD--
5	MATLKDQLIYNLLKEEQTPQNK	3	P00338	LDHA	5	--MATLkDQLIYN
10	SADTLWGIQKELQF	1	P00338	LDHA	328	TLWGIQkELQF--
4	LAAKQSSG	1	P62701	RPS4X	259	DKRLAAkQSSG--
5	MAAVKTLNPK	1	P40227	CCT6A	5	--MAAVkTLNPKA
5	MAQYKGAASEAGR	2	Q14320	FAM50A	5	--MAQYkGAASEA
4	GEEKPSMY	1	Q9UL46	PSME2	235	NPKGEEkPSMY--
5	MSILKIHAR	2	P06733	ENO1	5	--MSILkIHAREI
5	MVGVKPVGSDPDFQPELSGAGSR	3	O43396	TXNL1	5	--MVGVkPVGSDP
13	LAPDYDALDVANKIGII	1	P62750	RPL23A	152	ALDVANkIGII--
1	KAVIKNADMSEEMQQDSVECATQALEK	1	P63167	DYNLL1	5	--MCDRkAVIKNA
11	AAPGAEFAPNKR	1	Q15233	NONO	467	AEFAPNkRRRY--
5	MQSNKTFNLEK	2	Q15233	NONO	5	--MQSNkTFNLEK
3	YVKEQEQ	1	Q5TGZ0	MICOS10	74	LHGKYVkEQEQ--
5	MAETKLQLFVK	1	O95833	CLIC3	5	--MAETkLQLFVK
5	MTDSKYFTTTK	1	Q10567	AP1B1	5	--MTDSkYFTTTK
1	KEYMVR	1	Q6P5S7	RNASEK	132	VRLNKRkEYMVR-
6	MSVFGKLFGAGGGK	3	Q9H444	CHMP4B	6	-MSVFGkLFGAGG
4	VTPKEWR	1	P24311	COX7B	75	VGRVTPkEWRNQ-
4	AVTKYTSSK	1	Q16778	H2BC21	121	GTKAVTkYTSSK-
6	MPEPAKSAPAPK	2	Q16778	H2BC21	6	-MPEPAkSAPAPK
2	IKCVAFD	1	P09382	LGALS1	130	DGDFKIkCVAFD-
6	MENFQKVEK	1	P24941	CDK2	6	-MENFQkVEKIGE
4	AVTKYTSSK	1	Q5QNW6	H2BC18	121	GTKAVTkYTSSK-
6	MPDPAKSAPAPK	1	Q5QNW6	H2BC18	6	-MPDPAkSAPAPK
2	LKELKDQ	2	P61513	RPL37A	87	SAIRRLkELKDQ-
6	MATEEKKPETEAAR	1	P61964	WDR5	6	-MATEEkKPETEA
6	MSLLNKPK	1	P62316	SNRPD2	6	-MSLLNkPKSEMT
6	MQIFVKTLTGK	2	P62987	UBA52	6	-MQIFVkTLTGKT
17	VAEAHENIIHGSGATGK	1	Q08257	CRYZ	324	GSGATGkMILLL-
6	MSNLSKGTGSR	1	Q13618	CUL3	6	-MSNLSkGTGSRK
6	MQIFVKTLTGK	2	P62979	RPS27A	6	-MQIFVkTLTGKT
4	AVTKYTSSK	1	P33778	H2BC3	121	GTKAVTkYTSSK-
6	MPEPSKSAPAPK	1	P33778	H2BC3	6	-MPEPSkSAPAPK
6	MSDSEKLNLDSIIGR	1	P62136	PPP1CA	6	-MSDSEkLNLDSI
6	MAQNLKDLAGR	5	Q99623	PHB2	6	-MAQNLkDLAGRL
6	MESYHKPDQQKLQALKDTANR	3	P29401	TKT	6	-MESYHkPDQQKL
1	KDWSALSSLAR	1	O00515	LAD1	6	-MAVSRkDWSALS
6	MSQATKR	1	Q8N9N8	EIF1AD	6	-MSQATkRKHVVK
3	LPKEVQLE	1	Q9BS40	LXN	217	HNSRLPkEVQLE-
4	LSAKFGGQA	1	P50502	ST13	364	ISKLSAkFGGQA-
7	LNELLVKALERH	2	Q12931	TRAP1	699	LNELLVkALERH-
6	MSLSNKLTLDKLDVK	6	P00558	PGK1	6	-MSLSNkLTLDKL
3	VTKGETLT	1	Q8WUW1	BRK1	70	IEARVTkGETLT-
6	MAENGKNCDQR	2	Q96GC9	VMP1	6	-MAENGkNCDQRR
5	LSSEKGMGCS	2	Q15365	PCBP1	351	ARLSSEkGMGCS-
6	MAASAKK	1	P23588	EIF4B	6	-MAASAkKKNKKG
5	EKQAKGDTEF	1	Q9HB71	CACYBP	223	SREKQAkGDTEF-
6	MDWVMKHNGPNDASDGTVR	3	P31942	HNRNPH3	6	-MDWVMkHNGPND
2	QKLMARE	1	P18621	RPL17	179	KKLKKQkLMARE-
6	MAASAKR	2	P52594	AGFG1	6	-MAASAkRKQEEK
1	KFFVGGNWK	1	P60174	TPI1	6	-MAPSRkFFVGGN
6	MPVTEKDLAEDAPWK	2	O75369	FLNB	6	-MPVTEkDLAEDA
6	MASGCKIGPSILNSDLANLGAECLR	1	Q96AT9	RPE	6	-MASGCkIGPSIL
9	NVCSEAAQKR	1	Q96AT9	RPE	223	CSEAAQkRSLDR-
6	MPHAFKPGDLVFAK	3	Q7Z4V5	HDGFL2	6	-MPHAFkPGDLVF
6	MTTPGKENFR	1	P52294	KPNA1	6	-MTTPGkENFRLK
6	MDFNMKK	3	Q9NR46	SH3GLB2	6	-MDFNMkKLASDA
3	IGKEMQNA	1	P52907	CAPZA1	281	LSYKIGkEMQNA-
6	MASLLKVDQEVK	2	P61289	PSME3	6	-MASLLkVDQEVK
6	MAATMKK	1	Q9NQP4	PFDN4	6	-MAATMkKAAAED
8	ADLIAYLKK	1	P99999	CYCS	100	DLIAYLkKATNE-
8	ITTHFELKHLSSGDLLR	1	Q9UIJ7	AK3	34	TTHFELkHLSSGD
3	ALKSEFLVR	1	Q00577	PURA	144	EPRRALkSEFLVR
6	FYLDVKQNAK	1	Q00577	PURA	78	RFYLDVkQNAKGR
1	KYYMDLKENQR	1	Q00577	PURA	154	LVRENRkYYMDLK
5	VSEVKPTYR	1	Q00577	PURA	250	MRVSEVkPTYRNS
5	DAADKPR	1	Q13185	CBX3	113	KRDAADkPRGFAR
1	KSLSDSESDDSK	3	Q13185	CBX3	92	KDGTKRkSLSDSE
1	KVEEAEPEEFVVEK	2	Q13185	CBX3	21	QNGKSKkVEEAEP
13	SLSDSESDDSKSKK	1	Q13185	CBX3	105	SDDSKSkKKRDAA
5	ALIGKGHPEFSTNR	1	P45974	USP5	423	FKALIGkGHPEFS
5	DQALKALR	2	P45974	USP5	743	SRDQALkALRATN
8	AAQEEYVKR	3	P04075	ALDOA	330	AQEEYVkRALANS
12	ADDGRPFPQVIKSK	4	P04075	ALDOA	99	PFPQVIkSKGGVV
11	ALANSLACQGKYTPSGQAGAAASESLFVSNHAY	1	P04075	ALDOA	342	SLACQGkYTPSGQ
8	ALQASALKAWGGK	2	P04075	ALDOA	312	LQASALkAWGGKK
5	CAQYKKDGADFAK	1	P04075	ALDOA	139	ERCAQYkKDGADF
5	CPLLKPWALTFSYGR	2	P04075	ALDOA	294	NKCPLLkPWALTF
7	CQYVTEKVLAAVYK	1	P04075	ALDOA	208	CQYVTEkVLAAVY
7	DGADFAKWR	2	P04075	ALDOA	147	DGADFAkWRCVLK
4	ENLKAAQEEYVK	4	P04075	ALDOA	322	GKKENLkAAQEEY
14	GILAADESTGSIAK	8	P04075	ALDOA	42	STGSIAkRLQSIG
1	KDGADFAK	2	P04075	ALDOA	140	RCAQYKkDGADFA
1	KELSDIAHR	8	P04075	ALDOA	14	LTPEQKkELSDIA
6	IVAPGKGILAADESTGSIAK	4	P04075	ALDOA	28	RIVAPGkGILAAD
13	MPYQYPALTPEQKKELSDIAHR	9	P04075	ALDOA	13	ALTPEQkKELSDI
2	SKGGVVGIKVDK	1	P04075	ALDOA	101	PQVIKSkGGVVGI
3	VDKGVVPLAGTNGETTTQGLDGLSER	4	P04075	ALDOA	111	VGIKVDkGVVPLA
27	YASICQQNGIVPIVEPEILPDGDHDLKR	1	P04075	ALDOA	200	DGDHDLkRCQYVT
2	GKAMVFAPR	1	Q7Z624	CAMKMT	256	LLQPRGkAMVFAP
10	QCQPQVQAFKDCMSEQQAR	1	Q9NYJ1	COA4	62	PQVQAFkDCMSEQ
6	WQAIYKQFDTDR	1	P04632	CAPNS1	179	RWQAIYkQFDTDR
7	YLWNNIKR	1	P04632	CAPNS1	172	YLWNNIkRWQAIY
2	AKLAEQAER	4	P63104	YWHAZ	11	ELVQKAkLAEQAE
2	EKIETELR	2	P63104	YWHAZ	85	AREYREkIETELR
12	FLIPNASQAESKVFYLK	4	P63104	YWHAZ	115	ASQAESkVFYLKM
18	GIVDQSQQAYQEAFEISKK	4	P63104	YWHAZ	157	EAFEISkKEMQPT
1	KEMQPTHPIR	1	P63104	YWHAZ	158	AFEISKkEMQPTH
9	MDKNELVQKAK	3	P63104	YWHAZ	9	KNELVQkAKLAEQ
2	MKGDYYR	2	P63104	YWHAZ	122	VFYLKMkGDYYRY
8	NLLSVAYKNVVGAR	10	P63104	YWHAZ	49	LLSVAYkNVVGAR
7	TEGAEKKQQMAR	1	P63104	YWHAZ	75	TEGAEKkQQMARE
5	VFYLKMK	1	P63104	YWHAZ	120	SKVFYLkMKGDYY
8	VVSSIEQKTEGAEK	8	P63104	YWHAZ	68	VSSIEQkTEGAEK
14	VVSSIEQKTEGAEKK	3	P63104	YWHAZ	74	KTEGAEkKQQMAR
7	GADKTVKGPDGLTAFEATDNQAIK	3	P58546	MTPN	97	GADKTVkGPDGLT
5	LLLSKGADK	2	P58546	MTPN	90	VKLLLSkGADKTV
13	NGDLDEVKDYVAKGEDVNR	2	P58546	MTPN	24	VKDYVAkGEDVNR
12	EHALLAYTLGVK	5	Q05639	EEF1A2	146	AYTLGVkQLIVGV
3	FEKEAAEMGK	4	Q05639	EEF1A2	44	TIEKFEkEAAEMG
26	KEGNASGVSLLEALDTILPPTRPTDKPLRLPLQDVYK	1	Q05639	EEF1A2	244	PTRPTDkPLRLPL
1	KLEDNPK	2	Q05639	EEF1A2	386	DRRSGKkLEDNPK
7	KLEDNPKSLK	1	Q05639	EEF1A2	392	KLEDNPkSLKSGD
8	LPLQDVYKIGGIGTVPVGR	3	Q05639	EEF1A2	255	PLQDVYkIGGIGT
9	QTVAVGVIKNVEK	2	Q05639	EEF1A2	439	VAVGVIkNVEKKS
13	SGDAAIVEMVPGKPMCVESFSQYPPLGR	3	Q05639	EEF1A2	408	VEMVPGkPMCVES
3	SGKKLEDNPK	2	Q05639	EEF1A2	385	IDRRSGkKLEDNP
3	SLKSGDAAIVEMVPGKPMCVESFSQYPPLGR	1	Q05639	EEF1A2	395	DNPKSLkSGDAAI
4	TIEKFEKEAAEMGK	6	Q05639	EEF1A2	41	DKRTIEkFEKEAA
1	KVLELTGK	2	A0A0B4J2D5	GATD3B	261	IGAMVRkVLELTG
8	AEPTNPSKMR	1	Q9ULZ3	PYCARD	158	EPTNPSkMRKLFS
14	LSAQAQVAEDILDKYR	3	Q14C86	GAPVD1	1035	AEDILDkYRNAIK
7	LYVNSEKQLIQR	1	Q14C86	GAPVD1	24	LYVNSEkQLIQRL
2	AKDPFAHLPK	4	P26641	EEF1G	277	AAEPKAkDPFAHL
3	EEKQKPQAER	2	P26641	EEF1G	241	KGSREEkQKPQAE
14	EYFSWEGAFQHVGKAFNQGK	1	P26641	EEF1G	428	AFQHVGkAFNQGK
7	FAETQPKKDTPR	1	P26641	EEF1G	227	FAETQPkKDTPRK
1	KLDPGSEETQTLVR	1	P26641	EEF1G	401	ESYTWRkLDPGSE
4	LCEKMAQFDAK	3	P26641	EEF1G	212	EVKLCEkMAQFDA
10	ILGLLDAYLKTR	3	P26641	EEF1G	147	LLDAYLkTRTFLV
7	QATENAKEEVRR	1	P26641	EEF1G	132	QATENAkEEVRRI
2	QKPQAER	2	P26641	EEF1G	243	SREEKQkPQAERK
9	STFVLDEFKR	1	P26641	EEF1G	294	FVLDEFkRKYSNE
14	HLQLAIRNDEELNKLLGK	5	Q16777	H2AC20	96	NDEELNkLLGKVT
1	KGNYAER	3	Q16777	H2AC20	37	VHRLLRkGNYAER
19	VTIAQGGVLPNIQAVLLPKK	2	Q16777	H2AC20	119	QAVLLPkKTESHK
9	CTHWAEGGKGALALAQAVQR	1	P11586	MTHFD1	793	HWAEGGkGALALA
1	KITIGQAPTEK	2	P11586	MTHFD1	543	NDRFLRkITIGQA
12	KVVGDVAYDEAKER	1	P11586	MTHFD1	262	VAYDEAkERASFI
10	IFHELTQTDKALFNR	1	P11586	MTHFD1	473	ELTQTDkALFNRL
5	IIAQKIYGADDIELLPEAQHK	1	P11586	MTHFD1	832	IRIIAQkIYGADD
10	MAPAEILNGKEISAQIR	4	P11586	MTHFD1	10	AEILNGkEISAQI
2	TKLVLPSLISSR	1	Q13228	SELENBP1	93	STKSRTkLVLPSL
1	KELLLKR	1	Q9BW66	CINP	158	LLEMYRkELLLKR
14	HLQLAIRNDEELNKLLGR	2	Q7L7L0	H2AW	96	NDEELNkLLGRVT
1	KGNYSER	1	Q7L7L0	H2AW	37	VHRLLRkGNYSER
19	VTIAQGGVLPNIQAVLLPKK	2	Q7L7L0	H2AW	119	QAVLLPkKTESHH
1	KFQEQNETFQANR	1	Q92805	GOLGA1	105	QDSSMRkFQEQNE
2	SKFGAEFR	1	Q9BYG5	PARD6B	22	TMEVKSkFGAEFR
7	DAASVEKVLDQK	3	Q99729	HNRNPAB	125	DAASVEkVLDQKE
12	DAASVEKVLDQKEHR	1	Q99729	HNRNPAB	130	EKVLDQkEHRLDG
3	DLKDYFTK	2	Q99729	HNRNPAB	86	TSKKDLkDYFTKF
10	FGEVVDCTIKMDPNTGR	3	Q99729	HNRNPAB	101	VVDCTIkMDPNTG
8	FHTVSGSKCEIK	2	Q99729	HNRNPAB	223	HTVSGSkCEIKVA
8	GFVFITFKEEEPVKK	2	Q99729	HNRNPAB	203	FVFITFkEEEPVK
1	KFHTVSGSK	2	Q99729	HNRNPAB	215	KKVLEKkFHTVSG
12	MFVGGLSWDTSKK	1	Q99729	HNRNPAB	82	LSWDTSkKDLKDY
5	VAQPKEVYQQQQYGSGGR	1	Q99729	HNRNPAB	232	IKVAQPkEVYQQQ
5	TYHGKVVSSQDPR	1	Q5T280	SPOUT1	245	CKTYHGkVVSSQD
12	MGHAGAIIAGGKGGAK	1	P53597	SUCLG1	308	AIIAGGkGGAKEK
10	VLGPCSDILKR	2	P10644	PRKAR1A	367	PCSDILkRNIQQY
9	VSILESLDKWER	1	P10644	PRKAR1A	261	ILESLDkWERLTV
1	KGEGLPNFDNNNIK	1	Q9UBS4	DNAJB11	302	GAKLWKkGEGLPN
2	GKGEQIAR	1	P61026	RAB10	136	RVVPKGkGEQIAR
7	SFENISKWLR	1	P61026	RAB10	102	SFENISkWLRNID
1	KLKLDWDGVR	1	Q7L5N7	LPCAT2	352	FTKISRkLKLDWD
5	DSCGKGEMATGNGRR	1	P61758	VBP1	10	VKDSCGkGEMATG
1	KESTNSMETR	1	P61758	VBP1	95	KYMQKKkESTNSM
7	VYNWDVKR	1	P61758	VBP1	185	VYNWDVkRRNKDD
9	DCDHADEQKCYSCGEFGHIQK	1	P62633	CNBP	118	DHADEQkCYSCGE
9	EQCCYNCGKPGHLAR	1	P62633	CNBP	103	CCYNCGkPGHLAR
8	MSSNECFKCGR	4	P62633	CNBP	8	SSNECFkCGRSGH
2	LKATVTPSPVK	1	Q9H1E3	NUCKS1	175	MPKPRLkATVTPS
3	SGKNSQEDSEDSEDKDVK	1	Q9H1E3	NUCKS1	52	NKRRSGkNSQEDS
4	LGSKNADGK	1	Q9P1F3	ABRACL	20	IHRLGSkNADGKL
7	NHIQLVKLQVEEVHQLSR	1	Q9NR28	DIABLO	191	NHIQLVkLQVEEV
9	EAQNQPIDKAR	1	Q12996	CSTF3	49	QNQPIDkARKTYE
1	KMIEDR	1	Q12996	CSTF3	204	NIHLAKkMIEDRS
1	KNDPEKQNENTR	1	Q99590	SCAF11	986	GNDRYRkNDPEKQ
2	AKAGLLER	1	Q00341	HDLBP	1031	ANLDRAkAGLLER
12	IEGDPQGVQQAKR	2	Q00341	HDLBP	494	QGVQQAkRELLEL
2	TKDLIIEQR	1	Q00341	HDLBP	510	MENERTkDLIIEQ
5	FVASKNEQESR	1	Q96D71	REPS1	105	PRFVASkNEQESR
1	KGSVSHDTVQPR	1	Q96D71	REPS1	141	GRGQVKkGSVSHD
14	FAGLHFFNPVPVMKLVEVIK	1	Q16836	HADH	179	NPVPVMkLVEVIK
1	KGEQPTGQQR	2	Q92733	PRCC	443	KSFSKKkGEQPTG
1	KPSDGSPDTKPSR	1	Q92733	PRCC	207	PHAFSRkPSDGSP
7	FIDTTSKFGHGR	3	P39023	RPL3	373	FIDTTSkFGHGRF
7	FQTMEEKK	1	P39023	RPL3	385	FQTMEEkKAFMGP
4	IDLKFIDTTSK	4	P39023	RPL3	366	LEKIDLkFIDTTS
11	IGQGYLIKDGK	1	P39023	RPL3	297	YLIKDGkLIKNNA
3	IYKIGQGYLIK	3	P39023	RPL3	286	INKKIYkIGQGYL
7	SLLVQTKR	1	P39023	RPL3	356	SLLVQTkRRALEK
3	CDKTVYFAEK	1	P52943	CRIP2	10	KCPKCDkTVYFAE
14	GVNIGGAGSYIYEKPLAEGPQVTGPIEVPAAR	2	P52943	CRIP2	79	GSYIYEkPLAEGP
1	KVYFAEK	1	P52943	CRIP2	132	CPRCSKkVYFAEK
12	GVVQELQQAISKLEAR	1	P29692	EEF1D	107	LQQAISkLEARLN
6	LNVLEKSSPGHR	1	P29692	EEF1D	117	RLNVLEkSSPGHR
6	DVAEAKPELSLLGDGDH	1	Q2TAA2	IAH1	237	RDVAEAkPELSLL
3	WAKIILPR	1	Q2TAA2	IAH1	63	YNTRWAkIILPRL
2	AKNGKTIQVDNTDAEGR	1	P28838	LAP3	353	GDVVRAkNGKTIQ
5	AKNGKTIQVDNTDAEGR	1	P28838	LAP3	356	VRAKNGkTIQVDN
15	QVVDCQLADVNNIGKYR	1	P28838	LAP3	455	DVNNIGkYRSAGA
3	LSKVGQGNTER	1	Q06124	PTPN11	405	RELKLSkVGQGNT
8	ALDEYYDKHFTEFVPLR	1	P38606	ATP6V1A	467	LDEYYDkHFTEFV
5	LLDGKR	1	Q68DA7	FMN1	1054	IKLLDGkRSQTVG
10	LGLGEGAEEKSIPTLISR	3	P18754	RCC1	335	GEGAEEkSIPTLI
3	MVKEALHER	1	P43304	GPD2	138	EQYRMVkEALHER
7	EHFGTVKTHLTSLK	1	Q15631	TSN	69	EHFGTVkTHLTSL
20	EILTLLQGVHQGAGFQDIPKR	1	Q15631	TSN	56	GFQDIPkRCLKAR
4	GFNKETAAACVEK	2	Q15631	TSN	219	SIRGFNkETAAAC
1	KVVQSLEQTAR	1	Q15631	TSN	26	IREEIRkVVQSLE
5	LLNLKNDSLR	1	Q15631	TSN	187	FRLLNLkNDSLRK
9	HLGDRLEKK	1	Q14703	MBTPS1	28	GDRLEKkSFEKAP
1	KGAVAEDGDELRTEPEAK	2	P27695	APEX1	7	MPKRGKkGAVAED
1	KNAGFTPQER	2	P27695	APEX1	228	NPKGNKkNAGFTP
2	SKNVGWR	1	P27695	APEX1	276	MMNARSkNVGWRL
1	KEMSGDVR	1	P08133	ANXA6	580	VEHTIKkEMSGDV
3	SMKGAGTDEK	1	P08133	ANXA6	613	KLYKSMkGAGTDE
2	AKEAAEQDVEK	3	P26373	RPL13	200	IRAKRAkEAAEQD
1	KGDSSAEELK	2	P26373	RPL13	136	KPSAPKkGDSSAE
10	KGDSSAEELKLATQLTGPVMPVR	4	P26373	RPL13	145	SSAEELkLATQLT
6	KPSAPKKGDSSAEELK	1	P26373	RPL13	135	RKPSAPkKGDSSA
2	NKSTESLQANVQR	2	P26373	RPL13	105	DPRRRNkSTESLQ
2	SKLILFPR	2	P26373	RPL13	123	LKEYRSkLILFPR
7	VITEEEKNFK	4	P26373	RPL13	174	VITEEEkNFKAFA
10	VITEEEKNFKAFASLR	2	P26373	RPL13	177	EEEKNFkAFASLR
1	KTEQFCK	1	P23786	CPT2	79	NDGQFRkTEQFCK
8	EAFQALEKLNNR	1	Q12792	TWF1	192	AFQALEkLNNRQL
9	LAAFGQLHKVLGMDPLPSK	1	Q12906	ILF3	332	AFGQLHkVLGMDP
6	LHVAVKVLQDMGLPTGAEGR	1	Q12906	ILF3	460	KLHVAVkVLQDMG
5	LNQLKPGLQYK	1	Q12906	ILF3	413	MRLNQLkPGLQYK
4	FFYKEKESVNAK	1	P54578	USP14	334	MVRFFYkEKESVN
7	LQEEITKQSPTLQR	1	P54578	USP14	300	LQEEITkQSPTLQ
6	SVPELKDALKR	1	P54578	USP14	130	RSVPELkDALKRY
7	YLFTGLKLR	2	P54578	USP14	291	YLFTGLkLRLQEE
4	SHYKVGENADSQIK	1	P07305	H1-0	59	YIKSHYkVGENAD
1	KTNVAQIR	1	Q01432	AMPD3	731	EGNDIRkTNVAQI
7	EIAQDFKTDLR	1	P84243	H3-3A	80	EIAQDFkTDLRFQ
4	RYQKSTELLIR	2	P84243	H3-3A	57	EIRRYQkSTELLI
6	VTIMPKDIQLAR	2	P84243	H3-3A	123	RVTIMPkDIQLAR
7	MSVAGLKK	1	Q99961	SH3GL1	7	MSVAGLkKQFYKA
3	QGKIPDEELR	1	Q99961	SH3GL1	177	KKKRQGkIPDEEL
1	KTYSVPAHQER	1	P53701	HCCS	49	GPTCEKkTYSVPA
1	KSEASSEFAK	1	Q92620	DHX38	512	ADHMKRkSEASSE
2	LKAADIDQEVKER	1	Q86VP6	CAND1	577	CTIKRLkAADIDQ
14	MASASYHISNLLEK	2	Q86VP6	CAND1	14	ISNLLEkMTSSDK
6	ETPQQKYQR	1	Q13561	DCTN2	102	KETPQQkYQRLLH
2	HKASVEDADTQSK	2	Q13561	DCTN2	297	NEIAKHkASVEDA
19	LLGPDAAINLTDPDGALAKR	1	Q13561	DCTN2	175	PDGALAkRLLLQL
6	QLAALKQQLVASHLEK	1	Q13561	DCTN2	146	KQLAALkQQLVAS
4	VGTKGLDFSDR	2	Q13561	DCTN2	65	DKRVGTkGLDFSD
12	MGPGATAGGAEKSNVK	4	P62820	RAB1A	187	TAGGAEkSNVKIQ
17	NATNVEQSFMTMAAEIKK	1	P62820	RAB1A	173	TMAAEIkKRMGPG
4	SNVKIQSTPVK	2	P62820	RAB1A	191	AEKSNVkIQSTPV
7	TIELDGKTIK	2	P62820	RAB1A	58	TIELDGkTIKLQI
10	TIELDGKTIKLQIWDTAGQER	4	P62820	RAB1A	61	LDGKTIkLQIWDT
2	DKVVVFLK	1	Q86SX6	GLRX5	53	ALVKKDkVVVFLK
2	KKDQVTAQEIFQDNHEDGPTAK	1	P13010	XRCC5	545	LIEAKKkDQVTAQ
1	KTWTVVDAK	1	P13010	XRCC5	274	LQERVKkTWTVVD
1	KVITMFVQR	1	P13010	XRCC5	36	PFEQAKkVITMFV
2	IKTLFPLIEAK	3	P13010	XRCC5	534	IPLSKIkTLFPLI
7	SQIPLSKIK	1	P13010	XRCC5	532	SQIPLSkIKTLFP
8	ASAYNNLKGNLQNLER	1	P21283	ATP6V1C1	147	SAYNNLkGNLQNL
5	DQAFKAIR	1	Q96KG9	SCYL1	528	VRDQAFkAIRSFL
2	EKWSADMWR	1	Q96KG9	SCYL1	200	GRVVREkWSADMW
1	KPVVGQCTIER	1	Q9NZM1	MYOF	1386	HRQFGRkPVVGQC
7	AALQALKR	1	Q9H444	CHMP4B	70	AALQALkRKKRYE
3	AGKGGPTPQEAIQR	2	Q9H444	CHMP4B	17	GGGKAGkGGPTPQ
14	EALENANTNTEVLKNMGYAAK	1	Q9H444	CHMP4B	107	TNTEVLkNMGYAA
1	KQEFLEK	2	Q9H444	CHMP4B	39	EEMLSKkQEFLEK
1	KDNIQAMVIVPTR	2	P26196	DDX6	162	ERLDLKkDNIQAM
2	IKTSDVTSTK	1	P26196	DDX6	86	PKDLRIkTSDVTS
10	DAYCCAQQGKR	1	Q9NR33	POLE4	90	CCAQQGkRKTLQR
1	KLLSSDRNPPIDDLIK	1	O00629	KPNA4	97	AVQAARkLLSSDR
7	SISPEWKQQLQQK	1	O00159	MYO1C	868	SISPEWkQQLQQK
22	AGAIAPCEVTVPAQNTGLGPEKTSFFQALGITTK	1	P05388	RPLP0	134	TGLGPEkTSFFQA
12	CFIVGADNVGSKQMQQIR	1	P05388	RPLP0	38	ADNVGSkQMQQIR
14	EDLTEIRDMLLANKVPAAAR	1	P05388	RPLP0	106	DMLLANkVPAAAR
11	GHLENNPALEKLLPHIR	5	P05388	RPLP0	77	NNPALEkLLPHIR
10	IIQLLDDYPKCFIVGADNVGSK	2	P05388	RPLP0	26	LLDDYPkCFIVGA
26	NVASVCLQIGYPTVASVPHSIINGYKR	1	P05388	RPLP0	246	SIINGYkRVLALS
17	VLALSVETDYTFPLAEKVK	2	P05388	RPLP0	264	TFPLAEkVKAFLA
4	TVLKQEMNR	1	Q9BXJ9	NAA15	735	TVRTVLkQEMNRL
6	QAEHPKPSACR	1	P46527	CDKN1B	25	RQAEHPkPSACRN
9	RENLSDEDKLNNAK	1	Q14651	PLS1	580	NLSDEDkLNNAKY
1	KEALQQKQ	1	Q9Y333	LSM2	88	LQDAARkEALQQK
1	KQAEILQESR	1	O75347	TBCA	52	ENYDIKkQAEILQ
12	MRAEDGENYDIKK	2	O75347	TBCA	51	GENYDIkKQAEIL
5	QQEEKIEK	1	O75347	TBCA	36	AKQQEEkIEKMRA
8	AQAYQTGKDISTNYYASQK	1	P14625	HSP90B1	671	QAYQTGkDISTNY
4	EGVKFDESEKTK	1	P14625	HSP90B1	597	VAKEGVkFDESEK
12	ELISNASDALDKIR	3	P14625	HSP90B1	114	ASDALDkIRLISL
7	ETLQQHKLLK	1	P14625	HSP90B1	455	ETLQQHkLLKVIR
6	FQNVAKEGVK	1	P14625	HSP90B1	593	RFQNVAkEGVKFD
1	KEAESSPFVER	1	P14625	HSP90B1	547	MAGSSRkEAESSP
1	KTFEINPR	1	P14625	HSP90B1	683	YYASQKkTFEINP
1	KTLDMIK	1	P14625	HSP90B1	467	RKKLVRkTLDMIK
2	NKEIFLR	1	P14625	HSP90B1	97	NSLYKNkEIFLRE
7	NLGTIAKSGTSEFLNK	3	P14625	HSP90B1	168	NLGTIAkSGTSEF
6	YLNFVKGVVDSDDLPLNVSR	2	P14625	HSP90B1	434	KYLNFVkGVVDSD
1	KNQELEVVR	1	Q14203	DCTN1	398	QKLMEKkNQELEV
2	IKGEELSEANVR	1	Q14203	DCTN1	962	KKSLKIkGEELSE
7	AGLVIGKGGETIK	1	Q96AE4	FUBP1	203	AGLVIGkGGETIK
1	KIQNDAGVR	3	Q96AE4	FUBP1	300	NGEMIKkIQNDAG
20	IGGDAGTSLNSNDYGYGGQK	1	Q96AE4	FUBP1	64	YGYGGQkRPLEDG
8	IQQESGCKIQIAPDSGGLPER	1	Q96AE4	FUBP1	133	QQESGCkIQIAPD
7	ITGDPYKVQQAK	1	Q96AE4	FUBP1	243	ITGDPYkVQQAKE
6	NGEMIKKIQNDAGVR	1	Q96AE4	FUBP1	299	RNGEMIkKIQNDA
11	NPPPNADPNMKLFTIR	1	Q96AE4	FUBP1	425	NADPNMkLFTIRG
15	SCMLTGTPESVQSAKR	1	Q96AE4	FUBP1	161	ESVQSAkRLLDQI
2	LKDEVVR	1	Q14683	SMC1A	213	DRYQRLkDEVVRA
7	TSGTEPKIK	1	Q6PCE3	PGM2L1	575	TSGTEPkIKYYAE
16	ALIPLALEGTDVGQTKAAQALAK	3	Q9H3U1	UNC45A	707	TDVGQTkAAQALA
2	DKPSFVR	1	Q9H3U1	UNC45A	628	EQHPKDkPSFVRA
6	SQALEKLGR	1	Q9H3U1	UNC45A	104	RSQALEkLGRLDQ
1	KPESNAVTK	1	P27816	MAP4	968	AAATTRkPESNAV
11	LATNTSAPDLKNVR	1	P27816	MAP4	933	TSAPDLkNVRSKV
2	TKPLATTQPAK	1	P27816	MAP4	702	SPEKKTkPLATTQ
8	VGSTENIKHQPGGGR	1	P27816	MAP4	946	GSTENIkHQPGGG
2	DKINNWIVQLSK	1	P22415	USF1	214	ERRRRDkINNWIV
8	LQIEESSKPVR	1	P13984	GTF2F2	137	QIEESSkPVRLSQ
1	KLLPLVSDEVFIRDVAK	1	P11216	PYGB	521	DLSQLKkLLPLVS
3	SSKFGCRDPVR	1	P11216	PYGB	316	RRFKSSkFGCRDP
12	VLYPNDNFFEGKELR	1	P11216	PYGB	290	DNFFEGkELRLKQ
3	ALKEPPRDR	1	P30050	RPL12	86	LIIKALkEPPRDR
6	ATGDWKGLR	1	P30050	RPL12	54	KATGDWkGLRITV
15	CTGGEVGATSALAPKIGPLGLSPK	1	P30050	RPL12	31	TSALAPkIGPLGL
8	KVGDDIAKATGDWK	1	P30050	RPL12	48	VGDDIAkATGDWK
3	NIKHSGNITFDEIVNIAR	1	P30050	RPL12	99	KKQKNIkHSGNIT
16	QAQIEVVPSASALIIKALK	1	P30050	RPL12	83	ASALIIkALKEPP
1	KVSQWWER	2	Q9P035	HACD3	85	NITVQKkVSQWWE
1	KAQGQGGPEQGEER	1	A5YM69	ARHGEF35	313	QEDMERkAQGQGG
6	AIQSLKK	1	O75964	ATP5MG	54	RAIQSLkKIVNSA
11	IVNSAQTGSFKQLTVK	2	O75964	ATP5MG	66	AQTGSFkQLTVKE
5	NLVEKTPALVNAAVTYSKPR	1	O75964	ATP5MG	11	VRNLVEkTPALVN
18	NLVEKTPALVNAAVTYSKPR	1	O75964	ATP5MG	24	AAVTYSkPRLATF
8	SAFAPFGKISDAR	1	Q01085	TIAL1	122	AFAPFGkISDARV
3	VVKDMATGK	1	Q01085	TIAL1	130	SDARVVkDMATGK
2	MKAENSHNAGQVDTR	2	Q8IWZ3	ANKHD1	194	AALTRMkAENSHN
1	KGLIPWEQAAR	1	P58107	EPPK1	1028	VFQAMKkGLIPWE
8	SSNLLDLKNPFFR	2	Q86X55	CARM1	470	SNLLDLkNPFFRY
2	AKHLAAVEER	1	Q8TAQ2	SMARCC2	874	AAAVKAkHLAAVE
9	AAVEWFDGKDFQGSK	2	Q01844	EWSR1	433	VEWFDGkDFQGSK
15	AAVEWFDGKDFQGSKLK	1	Q01844	EWSR1	439	KDFQGSkLKVSLA
6	IECEIKINHEGEVNR	1	Q16576	RBBP7	119	KIECEIkINHEGE
8	DAAGSGDKPGADTGR	1	Q96EL3	MRPL53	105	AAGSGDkPGADTG
10	TFLQTVSSEKVR	1	Q96EL3	MRPL53	41	QTVSSEkVRSTNL
8	VQFCPFEKNVESTR	1	Q96EL3	MRPL53	25	QFCPFEkNVESTR
1	KAVVLEYFTR	1	O95707	POP4	54	EDQLQRkAVVLEY
2	LKGALMLENLQK	2	Q9UKV3	ACIN1	103	ALVKRLkGALMLE
5	VTDLKAALEQR	1	Q9UKV3	ACIN1	81	LRVTDLkAALEQR
6	IHLEIKQLNR	1	P49257	LMAN1	346	RIHLEIkQLNRQL
10	MESGAYGAAK	1	O43760	SYNGR2	10	GAYGAAkAGGSFD
2	GKATISNDGATILK	1	Q99832	CCT7	55	IVDGRGkATISND
4	GMDKLIVDGR	1	Q99832	CCT7	47	GPRGMDkLIVDGR
1	KTFSYAGFEMQPK	1	Q99832	CCT7	218	AGVAFKkTFSYAG
10	LLDVVHPAAKTLVDIAK	3	Q99832	CCT7	77	VVHPAAkTLVDIA
3	QVKPYVEEGLHPQIIIR	1	Q99832	CCT7	109	EFLKQVkPYVEEG
5	TIPGKQQLLIGAYAK	1	Q99832	CCT7	430	SRTIPGkQQLLIG
5	EDSVKPGAHLTVK	1	P51991	HNRNPA3	118	SREDSVkPGAHLT
9	RGEEGHDPKEPEQLR	2	P51991	HNRNPA3	29	EEGHDPkEPEQLR
3	YGKIETIEVMEDR	1	P51991	HNRNPA3	151	YFEKYGkIETIEV
12	YHTINGHNCEVKK	1	P51991	HNRNPA3	199	GHNCEVkKALSKQ
14	IDQVNQLLELDHQKR	3	P61201	COPS2	415	LELDHQkRGGARY
6	YTALDKWTNQLNSLNQAVVSK	1	P61201	COPS2	426	RYTALDkWTNQLN
13	DKVQAGDVITIDKATGK	1	Q9Y230	RUVBL2	197	DVITIDkATGKIS
11	FVQCPDGELQKR	1	Q9Y230	RUVBL2	234	PDGELQkRKEVVH
10	GTEVQVDDIKR	1	Q9Y230	RUVBL2	427	VQVDDIkRVYSLF
9	MATVTATTKVPEIR	1	Q9Y230	RUVBL2	9	TVTATTkVPEIRD
1	KVLPLEEAYR	1	Q9H223	EHD4	35	RSLYLRkVLPLEE
6	LGLAQKLMDQASR	4	Q9BSU3	NAA11	89	RLGLAQkLMDQAS
12	YYADGEDAYAMKR	1	Q9BSU3	NAA11	148	EDAYAMkRDLSQM
1	KYGLFKEENPYAR	1	P53801	PTTG1IP	164	HDEIRKkYGLFKE
11	LFDSTTLEHQKTFR	1	Q13347	EIF3I	224	TTLEHQkTFRTER
3	IGKFEAR	1	Q13347	EIF3I	264	TSTRIGkFEARFF
17	MPGLVDSNPAPPESQEKKPLKPCCACPETK	2	Q14061	COX17	17	PPESQEkKPLKPC
21	MPGLVDSNPAPPESQEKKPLKPCCACPETK	3	Q14061	COX17	21	QEKKPLkPCCACP
2	GKLVDCK	1	P35270	SPR	230	ELKAKGkLVDCKV
1	KGLQELK	1	P35270	SPR	220	VDPDMRkGLQELK
1	KQMEYER	1	Q8NE71	ABCF1	263	EKKKLKkQMEYER
2	LKLLEEERR	1	Q8NE71	ABCF1	389	ADTKRLkLLEEER
2	LKESYCQR	1	P63165	SUMO1	48	THLKKLkESYCQR
12	VIGQDSSEIHFKVK	1	P63165	SUMO1	37	SSEIHFkVKMTTH
2	EKEEAEAR	1	Q99543	DNAJC2	426	EQIRKEkEEAEAR
1	KAAQEQVLNASR	1	Q99543	DNAJC2	607	EMVKAKkAAQEQV
4	SEGKSMFAGVPTMR	3	O15260	SURF4	139	ESRSEGkSMFAGV
1	KIIMGLDK	1	P52298	NCBP2	68	KSGDIKkIIMGLD
7	IIMGLDKMK	1	P52298	NCBP2	75	IIMGLDkMKKTAC
7	MSGGLLKALR	2	P52298	NCBP2	7	MSGGLLkALRSDS
8	TDWDAGFKEGR	1	P52298	NCBP2	120	DWDAGFkEGRQYG
3	ALKLLKTEL	3	O95994	AGR2	169	NMKKALkLLKTEL
5	DSRPKLPQTLSR	2	O95994	AGR2	39	TKDSRPkLPQTLS
18	GWGDQLIWTQTYEEALYK	1	O95994	AGR2	64	YEEALYkSKTSNK
1	KVFAENKEIQK	2	O95994	AGR2	89	HSQALKkVFAENK
7	KVFAENKEIQK	2	O95994	AGR2	95	KVFAENkEIQKLA
17	LAEQFVLLNLVYETTDKHLSPDGQYVPR	4	O95994	AGR2	116	VYETTDkHLSPDG
17	LYAYEPADTALLLDNMKK	2	O95994	AGR2	165	LLLDNMkKALKLL
18	LYAYEPADTALLLDNMKKALK	2	O95994	AGR2	166	LLDNMKkALKLLK
4	AVAKQQNVQSASQDEK	1	Q2M389	WASHC4	1089	EIRAVAkQQNVQS
2	AKEAAALGSR	2	O75348	ATP6V1G1	58	EKEFKAkEAAALG
5	CAVIKTSTR	1	P17980	PSMC3	125	GKCAVIkTSTRQT
5	FDSEKAGDREVQR	1	P17980	PSMC3	300	KRFDSEkAGDREV
1	KIEFPMPNEEAR	3	P17980	PSMC3	351	SGRLDRkIEFPMP
1	KMNVSPDVNYEELAR	2	P17980	PSMC3	372	MQIHSRkMNVSPD
3	IMKSEVLR	1	P17980	PSMC3	56	SEIKIMkSEVLRV
11	EAKPEDLMDSKLR	1	O95292	VAPB	118	EDLMDSkLRCVFE
1	KVMEECKR	2	O95292	VAPB	168	DDTEVKkVMEECK
12	SLSSSLDDTEVKK	1	O95292	VAPB	167	LDDTEVkKVMEEC
5	EITLKGFR	1	Q9NR30	DDX21	481	QREITLkGFRNGS
11	IGVPSATEIIKASSK	1	Q9NR30	DDX21	573	SATEIIkASSKDA
9	IKDHIQNGKLDLTK	1	Q9NR30	DDX21	327	DHIQNGkLDLTKL
2	DKDAYSSFGSR	1	O00571	DDX3X	66	WSSSKDkDAYSSF
2	GKIGLDFCK	1	O00571	DDX3X	335	DMMERGkIGLDFC
2	GKSSFFSDR	2	O00571	DDX3X	81	RSDSRGkSSFFSD
5	SGFGKFER	1	O00571	DDX3X	118	DRSGFGkFERGGN
3	SGKSPILVATAVAAR	1	O00571	DDX3X	491	HQFRSGkSPILVA
11	VHTGFDQHEQKFTGLPR	1	O96013	PAK4	31	FDQHEQkFTGLPR
1	KASGQPAGPDNKENCPVPGKPGEAVAAR	1	P04183	TK1	192	RLCYFKkASGQPA
1	KLFAPQQILQCSPAN	2	P04183	TK1	220	EAVAARkLFAPQQ
16	MSCINLPTVLPGSPSKTR	1	P04183	TK1	16	LPGSPSkTRGQIQ
4	AVLKFAAATGATPIAGR	2	P08865	RPSA	89	GQRAVLkFAAATG
1	KSDGIYIINLK	3	P08865	RPSA	42	QYIYKRkSDGIYI
11	KSDGIYIINLKR	2	P08865	RPSA	52	IYIINLkRTWEKL
1	KGTCPSTLGEER	1	Q8N490	PNKD	326	RQRLERkGTCPST
12	EMDQTMAANAQKNK	1	P30085	CMPK1	86	MAANAQkNKFLID
5	ESSLKYQTR	1	O43684	BUB3	179	RRESSLkYQTRCI
8	MTGSNEFKLNQPPEDGISSVK	1	O43684	BUB3	8	TGSNEFkLNQPPE
14	VAVEYLDPSPEVQKK	1	O43684	BUB3	216	PSPEVQkKKYAFK
2	GKLLSNDEVTIK	2	Q92734	TFG	47	QRVFRGkLLSNDE
1	KVAFCGAPEEGR	1	Q8IZ83	ALDH16A1	245	SQPGIRkVAFCGA
1	KEGLSFLGGLR	1	Q6WKZ4	RAB11FIP1	296	NFTLPKkEGLSFL
3	AVKSAEAAAEATK	1	Q3LXA3	TKFC	525	VLTKAVkSAEAAA
2	IKMATADEIVK	1	Q3LXA3	TKFC	230	AGVRRIkMATADE
7	SDLDSLKGR	1	Q3LXA3	TKFC	46	SDLDSLkGRVALL
21	VAPAEPQEAPDSTAAGGSASKR	1	Q3LXA3	TKFC	372	AGGSASkRMALVL
2	DKDPPIPVAK	1	P13667	PDIA4	111	ANILKDkDPPIPV
10	FDVSGYPTLKIFR	1	P13667	PDIA4	256	SGYPTLkIFRKGR
10	FDVSGYPTIKILK	2	P13667	PDIA4	141	SGYPTIkILKKGQ
8	FIEEHATKLSR	1	P13667	PDIA4	637	IEEHATkLSRTKE
1	KGQAVDYEGSR	2	P13667	PDIA4	145	TIKILKkGQAVDY
1	KLAPEYEK	3	P13667	PDIA4	211	WCGHCKkLAPEYE
11	VDATAETDLAKR	1	P13667	PDIA4	245	AETDLAkRFDVSG
6	AETAAKHGEAQVK	2	P18669	PGAM1	106	KAETAAkHGEAQV
14	ALPFWNEEIVPQIKEGK	6	P18669	PGAM1	176	EIVPQIkEGKRVL
17	ALPFWNEEIVPQIKEGKR	2	P18669	PGAM1	179	PQIKEGkRVLIAA
18	FSGWYDADLSPAGHEEAKR	1	P18669	PGAM1	39	AGHEEAkRGGQAL
7	HGEAQVKIWR	2	P18669	PGAM1	113	HGEAQVkIWRRSY
10	HYGGLTGLNKAETAAK	2	P18669	PGAM1	100	GLTGLNkAETAAK
1	KAMEAVAAQGK	2	P18669	PGAM1	241	DEETVRkAMEAVA
21	SYDVPPPPMEPDHPFYSNISKDRR	2	P18669	PGAM1	138	FYSNISkDRRYAD
16	YADLTEDQLPSCESLKDTIAR	1	P18669	PGAM1	157	PSCESLkDTIARA
6	HMESEKLAQILAAR	1	Q8N6M0	OTUD6B	137	RHMESEkLAQILA
3	ELKVAMR	1	P41208	CETN2	54	IDVKELkVAMRAL
1	KLGEMWNNLNDSEKQPYITK	1	O15347	HMGB3	126	IGDVAKkLGEMWN
1	KNPEVPVNFAEFSK	3	O15347	HMGB3	30	REEHKKkNPEVPV
19	LGEMWNNLNDSEKQPYITKAAK	3	O15347	HMGB3	145	KQPYITkAAKLKE
2	LKEKYEK	1	O15347	HMGB3	150	TKAAKLkEKYEKD
2	IKSTNPGISIGDVAK	1	O15347	HMGB3	112	EFRPKIkSTNPGI
13	STNPGISIGDVAKK	1	O15347	HMGB3	125	SIGDVAkKLGEMW
2	LKSFNLSALEK	2	P13798	APEH	131	EKNRKLkSFNLSA
8	HAVSEGTKAVTK	2	Q16778	H2BC21	117	AVSEGTkAVTKYT
1	KESYSIYVYK	2	Q16778	H2BC21	35	KRKRSRkESYSIY
6	LAHYNKR	1	Q16778	H2BC21	86	RLAHYNkRSTITS
9	LLLPGELAKHAVSEGTK	6	Q16778	H2BC21	109	LPGELAkHAVSEG
11	QVHPDTGISSKAMGIMNSFVNDIFER	1	Q16778	H2BC21	58	DTGISSkAMGIMN
3	VLKQVHPDTGISSK	1	Q16778	H2BC21	47	YVYKVLkQVHPDT
6	TTILYKLK	1	P61204	ARF3	36	KTTILYkLKLGEI
2	VKTEACDR	1	Q9BZE4	GTPBP4	332	EGVIKVkTEACDR
3	CVKIFQGNVHNFEK	1	Q96DI7	SNRNP40	275	PKERCVkIFQGNV
4	SYSKLLCGLLAER	9	P14174	MIF	78	QNRSYSkLLCGLL
11	FASENDLPEWKER	2	P43487	RANBP1	68	NDLPEWkERGTGD
9	FLNAENAQKFK	1	P43487	RANBP1	150	NAENAQkFKTKFE
2	TKFEECR	1	P43487	RANBP1	154	AQKFKTkFEECRK
2	NKTEDLEATSEHFK	1	Q9BV40	VAMP8	47	LEHLRNkTEDLEA
6	ALLAQKQEVLGQLR	1	Q9BRZ2	TRIM56	270	RALLAQkQEVLGQ
2	EKDPKYSALR	2	Q6UW68	TMEM205	146	YRQLREkDPKYSA
13	TTAAMWALQTVEKER	3	Q6UW68	TMEM205	122	ALQTVEkERGLGG
1	KGMAGDWK	1	P0DMN0	SULT1A4	258	ISPFMRkGMAGDW
2	IKLQLWDTAGQER	2	Q14964	RAB39A	63	EPGKRIkLQLWDT
7	VLIGVGKLLR	2	Q15393	SF3B3	965	VLIGVGkLLRVYD
2	LKDLAFLK	1	L0R6Q1	SLC35A4	12	DSLPKLkDLAFLK
9	MAENHAQNKAK	1	Q8NHP6	MOSPD2	9	ENHAQNkAKLISE
4	VEWKFDQGDTTR	2	Q9Y624	F11R	63	SPRVEWkFDQGDT
4	AIYKGPGSEAGP	1	P21964	COMT	263	LEKAIYkGPGSEA
2	DKQPYEQK	1	P26583	HMGB2	141	EQSAKDkQPYEQK
4	EKSKFEDMAK	1	P26583	HMGB2	59	SAKEKSkFEDMAK
2	EKYEKDIAAYR	3	P26583	HMGB2	154	AAKLKEkYEKDIA
14	KHPDSSVNFAEFSK	2	P26583	HMGB2	43	NFAEFSkKCSERW
1	KHPDSSVNFAEFSK	8	P26583	HMGB2	30	REEHKKkHPDSSV
1	KLGEMWSEQSAK	2	P26583	HMGB2	128	IGDTAKkLGEMWS
2	LKEKYEK	1	P26583	HMGB2	152	QKAAKLkEKYEKD
2	IKSEHPGLSIGDTAK	2	P26583	HMGB2	114	EHRPKIkSEHPGL
16	MSSYAFFVQTCREEHKK	1	P26583	HMGB2	28	TCREEHkKKHPDS
2	WKTMSAK	1	P26583	HMGB2	50	KCSERWkTMSAKE
3	YEKDIAAYR	1	P26583	HMGB2	157	LKEKYEkDIAAYR
8	ADSEQPSKRPR	1	Q9Y3Z3	SAMHD1	11	DSEQPSkRPRCDD
1	KEMIAQQR	1	O75940	SMNDC1	143	NKPMSKkEMIAQQ
1	KEEPSNNVK	1	Q14974	KPNB1	183	IIQGMRkEEPSNN
8	TLATWATKELR	6	Q14974	KPNB1	867	LATWATkELRKLK
8	VAAGLQIKNSLTSKDPDIK	3	Q14974	KPNB1	62	AAGLQIkNSLTSK
14	VAAGLQIKNSLTSKDPDIK	2	Q14974	KPNB1	68	KNSLTSkDPDIKA
8	LTQDAVAKANQTK	1	Q9Y224	RTRAF	171	TQDAVAkANQTKE
2	GKFNTSDVSAIEK	1	P19367	HK1	333	ELLTRGkFNTSDV
5	VLLVKIR	1	P19367	HK1	544	FRVLLVkIRSGKK
13	DALSDLALHFLNKMK	2	P50991	CCT4	319	ALHFLNkMKIMVI
8	FSNISAAKAVADAIR	3	P50991	CCT4	42	SNISAAkAVADAI
8	GAYQDRDKPAQIR	1	P50991	CCT4	29	AYQDRDkPAQIRF
2	GKGAYQDRDKPAQIR	2	P50991	CCT4	21	AAGGRGkGAYQDR
4	GSNKLVIEEAER	1	P50991	CCT4	395	VVRGSNkLVIEEA
6	HAQGEKTAGINVR	2	P50991	CCT4	489	RHAQGEkTAGINV
4	LLQKGIHPTIISESFQK	1	P50991	CCT4	126	CTKLLQkGIHPTI
20	MIQDGKGDVTITNDGATILKQMQVLHPAAR	1	P50991	CCT4	79	DGATILkQMQVLH
4	SILKIDDVVNTR	1	P50991	CCT4	531	TVRSILkIDDVVN
6	TSLGPKGMDK	1	P50991	CCT4	55	RTSLGPkGMDKMI
9	IVDPEIALKILHR	1	P33240	CSTF2	189	DPEIALkILHRQT
11	ALDEGDIALLKTYGQSTYSR	1	P35998	PSMC2	34	GDIALLkTYGQST
1	KIEFSLPDLEGR	3	P35998	PSMC2	340	PGRLDRkIEFSLP
5	IATEKDFLEAVNKVIK	1	P35998	PSMC2	407	RKIATEkDFLEAV
4	SYAKFSATPR	1	P35998	PSMC2	422	VIKSYAkFSATPR
6	TKEDEKDDKPIR	1	P35998	PSMC2	17	KTKEDEkDDKPIR
9	VIGSELVQKYVGEGAR	1	P35998	PSMC2	248	GSELVQkYVGEGA
4	AFFKGAWSNVLR	5	P12236	SLC25A6	272	GGKAFFkGAWSNV
5	DEGGKAFFK	4	P12236	SLC25A6	268	FRDEGGkAFFKGA
8	GLGDCLVKITKSDGIR	1	P12236	SLC25A6	163	LGDCLVkITKSDG
11	GLGDCLVKITKSDGIR	1	P12236	SLC25A6	166	CLVKITkSDGIRG
1	KGADIMYTGTVDCWR	1	P12236	SLC25A6	245	MMQSGRkGADIMY
7	LAADVGKSGTER	2	P12236	SLC25A6	147	LAADVGkSGTERE
3	IPKEQGVLSFWR	3	P12236	SLC25A6	63	CIVRIPkEQGVLS
2	VKLLLQVQHASK	1	P12236	SLC25A6	33	APIERVkLLLQVQ
14	YFPTQALNFAFKDKYK	1	P12236	SLC25A6	94	NFAFKDkYKQIFL
5	GEGPKTSWTR	1	P29373	CRABP2	107	LKGEGPkTSWTRE
1	KIAVAAASKPAVEIKQEGDTFYIK	4	P29373	CRABP2	31	VNVMLRkIAVAAA
8	IAVAAASKPAVEIK	2	P29373	CRABP2	39	AVAAASkPAVEIK
3	LLKGEGPK	1	P29373	CRABP2	102	CEQKLLkGEGPKT
6	MVCEQKLLKGEGPK	2	P29373	CRABP2	99	KMVCEQkLLKGEG
4	SLVKWESENK	4	P29373	CRABP2	87	PCKSLVkWESENK
10	SLVKWESENKMVCEQK	1	P29373	CRABP2	93	KWESENkMVCEQK
16	VGEEFEEQTVDGRPCKSLVK	2	P29373	CRABP2	83	VDGRPCkSLVKWE
5	QVEGKNPVTIFSLATNEMWR	1	Q04837	SSBP1	51	LRQVEGkNPVTIF
15	SGDSEVYQLGDVSQKTTWHR	2	Q04837	SSBP1	81	LGDVSQkTTWHRI
12	ILVTGGSGLVGKAIQK	1	Q13630	GFUS	21	GSGLVGkAIQKVV
1	KVDAETVGR	1	P11172	UMPS	188	ILEQQKkVDAETV
1	KLELSDNR	4	P39687	ANP32A	68	KLNKLKkLELSDN
1	KREPEDEGEDDD	2	P39687	ANP32A	238	ERGQKRkREPEDE
3	GAKSDPSIVR	1	P61601	NCALD	174	EFIRGAkSDPSIV
15	FNAHGDANTIVCNSKDGGAWGTEQR	1	P09382	LGALS1	64	TIVCNSkDGGAWG
13	MACGLVASNLNLKPGECLR	1	P09382	LGALS1	13	ASNLNLkPGECLR
10	VRGEVAPDAKSFVLNLGK	2	P09382	LGALS1	29	EVAPDAkSFVLNL
7	FANYIDKVR	4	P08670	VIM	120	FANYIDkVRFLEQ
1	KLLEGEESR	1	P08670	VIM	402	EIATYRkLLEGEE
3	ELKVCLLGDTGVGK	2	Q9UL26	RAB22A	7	MALRELkVCLLGD
4	INNKNTAESQR	1	Q03701	CEBPZ	126	IPKINNkNTAESQ
2	MKGTFVERDR	1	P09012	SNRPA	98	DIIAKMkGTFVER
8	SQETPATKK	1	P09012	SNRPA	122	QETPATkKAVQGG
13	GYPPEDIFNLVGKK	3	Q9NR45	NANS	333	IFNLVGkKVLVTV
3	MAKECGADCAK	2	Q9NR45	NANS	44	RMIRMAkECGADC
12	QLLPCEMACNEKLGK	3	Q9NR45	NANS	290	EMACNEkLGKSVV
6	SELEFKFNR	3	Q9NR45	NANS	61	KSELEFkFNRKAL
14	VGSGDTNNFPYLEKTAK	1	Q9NR45	NANS	145	NFPYLEkTAKKGR
6	ADINTKWAATR	1	P50914	RPL14	85	KADINTkWAATRW
2	AKMTDFDRFK	1	P50914	RPL14	103	ARERKAkMTDFDR
5	APAQKAPAPK	1	P50914	RPL14	204	QKAPAQkAPAPKA
5	ATGQKAAPAPK	1	P50914	RPL14	187	QKATGQkAAPAPK
5	QAWQKADINTK	2	P50914	RPL14	79	VRQAWQkADINTK
12	VAYVSFGPHAGKLVAIVDVIDQNR	1	P50914	RPL14	23	FGPHAGkLVAIVD
12	ADLINNLGTIAKSGTK	6	P07900	HSP90AA1	112	NLGTIAkSGTKAF
11	DNSTMGYMAAK	3	P07900	HSP90AA1	631	MGYMAAkKHLEIN
5	EFEGKTLVSVTK	2	P07900	HSP90AA1	539	LKEFEGkTLVSVT
2	EKYIDQEELNK	4	P07900	HSP90AA1	283	KKKIKEkYIDQEE
12	ELISNSSDALDKIR	5	P07900	HSP90AA1	58	SSDALDkIRYESL
7	EMLQQSKILK	2	P07900	HSP90AA1	407	EMLQQSkILKVIR
6	FENLCKIMK	1	P07900	HSP90AA1	573	KFENLCkIMKDIL
3	GTKVILHLKEDQTEYLEER	2	P07900	HSP90AA1	185	PMGRGTkVILHLK
21	HGLEVIYMIEPIDEYCVQQLK	3	P07900	HSP90AA1	534	YCVQQLkEFEGKT
10	HIYYITGETKDQVANSAFVER	3	P07900	HSP90AA1	499	YITGETkDQVANS
1	KHGLEVIYMIEPIDEYCVQQLKEFEGK	2	P07900	HSP90AA1	513	FVERLRkHGLEVI
1	KHLEINPDHSIIETLR	3	P07900	HSP90AA1	632	GYMAAKkHLEINP
1	KHSQFIGYPITLFVEK	13	P07900	HSP90AA1	209	IKEIVKkHSQFIG
1	KVEKVVVSNR	1	P07900	HSP90AA1	582	KDILEKkVEKVVV
2	IKEKYIDQEELNK	2	P07900	HSP90AA1	281	KKKKKIkEKYIDQ
3	ILKVIR	1	P07900	HSP90AA1	410	QQSKILkVIRKNL
3	IMKAQALR	2	P07900	HSP90AA1	615	NMERIMkAQALRD
2	TKFENLCK	2	P07900	HSP90AA1	567	QEEKKTkFENLCK
3	VEKVVVSNR	1	P07900	HSP90AA1	585	LEKKVEkVVVSNR
9	YIDQEELNKTKPIWTR	2	P07900	HSP90AA1	292	DQEELNkTKPIWT
1	KVPQVSTPTLVEVSR	1	P02768	ALB	438	LVRYTKkVPQVST
1	KLAVNMVPFPR	7	Q13885	TUBB2A	252	LNADLRkLAVNMV
12	INVYYNEAAGNKYVPR	1	Q13885	TUBB2A	58	NEAAGNkYVPRAI
17	MSATFIGNSTAIQELFKR	4	Q13885	TUBB2A	379	AIQELFkRISEQF
4	MSMKEVDEQMLNVQNK	2	Q13885	TUBB2A	324	RGRMSMkEVDEQM
14	DHASIQMNVAEVDKVTGR	2	P63220	RPS21	41	NVAEVDkVTGRFN
6	FNGQFKTYAICGAIR	1	P63220	RPS21	51	RFNGQFkTYAICG
3	LAKADGIVSK	2	P63220	RPS21	74	SILRLAkADGIVS
5	IIGAKDHASIQMNVAEVDKVTGR	3	P63220	RPS21	27	NRIIGAkDHASIQ
16	MQNDAGEFVDLYVPRK	3	P63220	RPS21	16	DLYVPRkCSASNR
2	VKLCYIGAGDEEKR	1	Q96L73	NSD1	620	VCGSKVkLCYIGA
13	VKLCYIGAGDEEKR	1	Q96L73	NSD1	631	GAGDEEkRSDSIS
8	ALASIDSKLNQAK	1	P18206	VCL	276	LASIDSkLNQAKG
7	ALIQCAKDIAK	3	P18206	VCL	1020	ALIQCAkDIAKAS
4	EVAKQCTDKR	1	P18206	VCL	1038	LAKEVAkQCTDKR
3	VGKETVQTTEDQILKR	2	P18206	VCL	59	NLVRVGkETVQTT
2	AKLAEQAER	2	P31947	SFN	11	SLIQKAkLAEQAE
6	ASLIQKAK	1	P31947	SFN	9	RASLIQkAKLAEQ
5	GAVEKGEELSCEER	2	P31947	SFN	32	MKGAVEkGEELSC
2	MKGDYYR	2	P31947	SFN	124	VFYLKMkGDYYRY
8	NLLSVAYKNVVGGQR	1	P31947	SFN	49	LLSVAYkNVVGGQ
9	SNEEGSEEKGPEVR	2	P31947	SFN	77	EEGSEEkGPEVRE
5	VFYLKMK	1	P31947	SFN	122	SRVFYLkMKGDYY
8	VLSSIEQKSNEEGSEEKGPEVR	2	P31947	SFN	68	LSSIEQkSNEEGS
2	AKEILTK	1	P62714	PPP2CB	36	TLCEKAkEILTKE
7	AKEILTKESNVQEVR	1	P62714	PPP2CB	41	AKEILTkESNVQE
2	AKLAEQAER	1	P31946	YWHAB	13	ELVQKAkLAEQAE
22	AVTEQGHELSNEERNLLSVAYKNVVGAR	1	P31946	YWHAB	51	LLSVAYkNVVGAR
1	KEMQPTHPIR	1	P31946	YWHAB	160	AFEISKkEMQPTH
1	KQQMGKEYR	1	P31946	YWHAB	77	TERNEKkQQMGKE
2	MKGDYFR	1	P31946	YWHAB	124	VFYLKMkGDYFRY
11	MTMDKSELVQKAK	3	P31946	YWHAB	11	KSELVQkAKLAEQ
19	QTTVSNSQQAYQEAFEISKK	2	P31946	YWHAB	159	EAFEISkKEMQPT
5	VFYLKMK	1	P31946	YWHAB	122	SKVFYLkMKGDYF
8	VISSIEQKTER	5	P31946	YWHAB	70	ISSIEQkTERNEK
11	YLSEVASGDNKQTTVSNSQQAYQEAFEISKK	1	P31946	YWHAB	140	VASGDNkQTTVSN
6	AQKADKNEVAAEVAK	1	P56192	MARS1	866	KAQKADkNEVAAE
2	IKGSEADRQR	1	P56192	MARS1	729	EPWKRIkGSEADR
4	QVPKTHLMSEEEWRR	1	P33552	CKS2	34	LSKQVPkTHLMSE
1	KLLSESAQPLK	1	Q9H3N1	TMX1	223	YPYPSKkLLSESA
5	IYADKAADIIDGLR	1	Q96ST3	SIN3A	676	QRIYADkAADIID
6	GSYSIKSR	1	P52565	ARHGDIA	178	RGSYSIkSRFTDD
3	GVKIDKTDYMVGSYGPR	4	P52565	ARHGDIA	138	TYRKGVkIDKTDY
6	GVKIDKTDYMVGSYGPR	1	P52565	ARHGDIA	141	KGVKIDkTDYMVG
28	MAEQEPTAEQLAQIAAENEEDEHSVNYKPPAQK	5	P52565	ARHGDIA	28	EHSVNYkPPAQKS
2	YKEALLGR	4	P52565	ARHGDIA	52	ESLRKYkEALLGR
1	KGAEPSGGAAR	1	O00762	UBE2C	18	SVAAARkGAEPSG
13	AEEDVEPECIMEKVAK	1	Q9UJU6	DBNL	131	PECIMEkVAKASG
16	FQDVGPQAPVGSVYQK	1	Q9UJU6	DBNL	164	VGSVYQkTNAVSE
13	EFHLNESGDPSSK	2	Q01105	SET	167	SGDPSSkSTEIKW
1	KPRPPPALGPEETSASAGLPK	1	Q01105	SET	15	LPPQKKkPRPPPA
6	QPFFQKR	1	Q01105	SET	83	RQPFFQkRSELIA
3	SGKDLTKR	1	Q01105	SET	177	IKWKSGkDLTKRS
5	STEIKWK	1	Q01105	SET	172	SKSTEIkWKSGKD
10	VEVTEFEDIKSGYR	1	Q01105	SET	132	TEFEDIkSGYRID
4	VLSKEFHLNESGDPSSK	1	Q01105	SET	154	ENKVLSkEFHLNE
5	AIGVKPPR	1	P55072	VCP	236	FKAIGVkPPRGIL
1	KAFEEAEK	1	P55072	VCP	288	SESNLRkAFEEAE
1	KGDIFLVR	1	P55072	VCP	148	AYRPIRkGDIFLV
1	KSPVAKDVDLEFLAK	1	P55072	VCP	663	LKANLRkSPVAKD
1	KYEMFAQTLQQSR	2	P55072	VCP	754	SDNDIRkYEMFAQ
13	IVSQLLTLMDGLKQR	2	P55072	VCP	336	TLMDGLkQRAHVI
8	MASGADSKGDDLSTAILK	3	P55072	VCP	8	ASGADSkGDDLST
18	MASGADSKGDDLSTAILKQK	1	P55072	VCP	18	LSTAILkQKNRPN
5	VAILKANLR	1	P55072	VCP	658	SRVAILkANLRKS
15	VINQILTEMDGMSTKK	1	P55072	VCP	614	MDGMSTkKNVFII
15	LHLQGQTMQDPFGEKR	2	Q9H832	UBE2Z	304	QDPFGEkRGHFDY
2	LKEEPDREAR	1	P26358	DNMT1	259	TPKQKLkEEPDRE
1	KMGSNLTASEEEFLR	2	Q9NSA3	CTNNBIP1	28	VLLMLRkMGSNLT
6	GIDYDKLIVR	1	P23381	WARS1	102	KGIDYDkLIVRFG
1	KLSFDFQ	2	P23381	WARS1	465	EFMTPRkLSFDFQ
3	SLKAGNASKDEIDSAVK	1	P23381	WARS1	27	ELVRSLkAGNASK
8	ALDAAFYKTFK	3	P10155	RO60	359	LDAAFYkTFKTVE
20	SELPLDPLPVPTEEGNPLLKHYR	1	Q15758	SLC1A5	522	EGNPLLkHYRGPA
1	KAASQPTSLAPEK	1	Q96N66	MBOAT7	456	GSPSRRkAASQPT
1	KEMASGFSK	2	Q96N66	MBOAT7	128	LHLAQRkEMASGF
2	EKCPGCR	1	P0DN79	NA	271	ARKLKEkCPGCRI
6	SAEAQKLGNGINIIVATPGR	1	Q9NVP1	DDX18	297	RSAEAQkLGNGIN
9	FRLNLYELKEGR	1	P49720	PSMB3	77	LNLYELkEGRQIK
1	KLAEQFPR	1	Q96K17	BTF3L4	115	SLTSLRkLAEQFP
3	LAKLQAQVR	2	Q96K17	BTF3L4	8	NQEKLAkLQAQVR
6	QIISEKLGR	1	P53367	ARFIP1	146	RQIISEkLGRGSR
1	KILTPIIFKEENLR	1	P82650	MRPS22	203	FPKEGRkILTPII
9	KILTPIIFKEENLR	1	P82650	MRPS22	211	LTPIIFkEENLRT
13	TQQQVEAEVTNIKK	1	Q9H9Q2	COPS7B	217	AEVTNIkKTLKAT
1	KTSEGVTNEK	1	Q13451	FKBP5	432	NKAMGKkTSEGVT
9	VLEVNPQNKAAR	1	Q13451	FKBP5	385	EVNPQNkAARLQI
13	MAANSSGQGFQNKNR	1	Q9NRY2	INIP	13	GQGFQNkNRVAIL
9	FLILPDMLKNAPMLK	2	P62318	SNRPD3	78	ILPDMLkNAPMLK
8	MSIGVPIKVLHEAEGHIVTCETNTGEVYR	1	P62318	SNRPD3	8	SIGVPIkVLHEAE
2	CKQLESTQTESNKK	1	P33176	KIF5B	609	TMVKRCkQLESTQ
1	KLFVQDLATR	1	P33176	KIF5B	801	TLHNLRkLFVQDL
1	KSAEIDSDDTGGSAAQK	1	P33176	KIF5B	813	LATRVKkSAEIDS
2	LKATDQEK	3	P33176	KIF5B	755	VEHEKLkATDQEK
2	LKTQMLDQEELLASTRR	1	P33176	KIF5B	450	QLVEKLkTQMLDQ
2	QKISFLENNLEQLTK	1	P33176	KIF5B	831	SAAQKQkISFLEN
3	VSKTGAEGAVLDEAK	1	P33176	KIF5B	240	GSEKVSkTGAEGA
3	STKPGAAPTEHK	1	Q8N163	CCAR2	791	PPGKSTkPGAAPT
7	ADIEEIKSGR	1	P80303	NUCB2	84	ADIEEIkSGRLSK
2	AKLDSLQDIGMDHQALLK	1	P80303	NUCB2	121	RMLIKAkLDSLQD
2	LKLEETR	1	Q9NZ63	C9orf78	30	SEEVRLkLEETRE
2	IKINEEFKNNK	1	Q5U5X0	LYRM7	35	LEAARIkINEEFK
7	APQAAGKIHTDFEK	1	Q9NTK5	OLA1	333	APQAAGkIHTDFE
13	YLEANMTQSALPKIIK	1	Q9NTK5	OLA1	294	TQSALPkIIKAGF
10	GGAGVGSMTKIYGGR	1	P39019	RPS19	77	GVGSMTkIYGGRQ
2	HKELAPYDENWFYTR	6	P39019	RPS19	43	VKLAKHkELAPYD
1	KLTPQGQR	1	P39019	RPS19	122	DQDGGRkLTPQGQ
3	LAKHKELAPYDENWFYTR	1	P39019	RPS19	41	DTVKLAkHKELAP
2	LKVPEWVDTVK	5	P39019	RPS19	29	KKSGKLkVPEWVD
11	LKVPEWVDTVKLAK	2	P39019	RPS19	38	EWVDTVkLAKHKE
7	MPGVTVKDVNQQEFVR	1	P39019	RPS19	7	MPGVTVkDVNQQE
4	MVEKDQDGGR	5	P39019	RPS19	115	GLKMVEkDQDGGR
3	SGKLKVPEWVDTVK	2	P39019	RPS19	27	FLKKSGkLKVPEW
9	VLQALEGLKMVEK	4	P39019	RPS19	111	QALEGLkMVEKDQ
7	SWHDIEKDNAR	1	Q15437	SEC23B	320	SWHDIEkDNARFM
6	ESSVAKLGSVCR	1	Q9Y3A3	MOB4	155	KESSVAkLGSVCR
3	SLKSTQDEINQAR	1	Q9UBC2	EPS15L1	534	TIIKSLkSTQDEI
11	VGASEAALFLKK	1	Q9UBC2	EPS15L1	44	EAALFLkKSGLSD
14	MPAYHSSLMDPDTKLIGNMALLPIR	1	O15145	ARPC3	14	LMDPDTkLIGNMA
5	QFMNKSLSGPGQ	3	O15145	ARPC3	171	KRQFMNkSLSGPG
1	KLAVNMVPFPR	7	Q13509	TUBB3	252	LNADLRkLAVNMV
12	ISVYYNEASSHKYVPR	1	Q13509	TUBB3	58	NEASSHkYVPRAI
6	INSGGKLPNFGFVVFDDSEPVQK	1	Q13283	G3BP1	376	RINSGGkLPNFGF
8	AVHISNPKTAEFQVAR	1	Q9NSD9	FARSB	443	VHISNPkTAEFQV
3	NEKGYGPATQVR	1	P51610	HCFC1	1989	IAARNEkGYGPAT
2	QKADEAYLIGR	1	P11498	PC	79	GQMHRQkADEAYL
10	AQLGGPEAAKSDETAAK	5	P04792	HSPB1	198	GGPEAAkSDETAA
9	DGVVEITGKHEER	7	P04792	HSPB1	123	VVEITGkHEERQD
1	KYTLPPGVDPTQVSSSLSPEGTLTVEAPMPK	13	P04792	HSPB1	141	SRCFTRkYTLPPG
2	TKDGVVEITGK	2	P04792	HSPB1	114	ELTVKTkDGVVEI
16	VSLDVNHFAPDELTVKTK	1	P04792	HSPB1	112	PDELTVkTKDGVV
4	FEGKPLLQR	1	Q9H3K6	BOLA2	47	SAKFEGkPLLQRH
1	KETEFLR	1	Q9Y2H1	STK38L	73	RSQHARkETEFLR
1	KLDNKDLFGK	1	O75131	CPNE3	149	FEMEARkLDNKDL
9	SDPYLEFHKQTSDGNWLMVHR	1	O75131	CPNE3	167	PYLEFHkQTSDGN
1	KLFGQESGPSAEK	2	Q9BWH2	FUNDC2	68	KQPWWRkLFGQES
2	SKAEEVVSFVKK	1	Q9BWH2	FUNDC2	161	PTEVRSkAEEVVS
11	SKAEEVVSFVKK	1	Q9BWH2	FUNDC2	170	EVVSFVkKNVLVT
3	QAKAADVR	1	P56945	BCAR1	804	TLSRQAkAADVRS
2	VKELGHSTQQFR	1	P56945	BCAR1	851	DMVERVkELGHST
3	SGKLVFLGLDNAGK	2	Q9NR31	SAR1A	27	LYKKSGkLVFLGL
8	TDAISEEKLR	1	Q9NR31	SAR1A	146	DAISEEkLREIFG
8	TTLLHMLKDDR	1	Q9NR31	SAR1A	46	TLLHMLkDDRLGQ
1	KYDAFLASESLIK	7	P62906	RPL10A	106	VKKLAKkYDAFLA
13	KYDAFLASESLIKQIPR	3	P62906	RPL10A	118	ASESLIkQIPRIL
11	AALQEELQLCKGLVQALQTK	2	P49327	FASN	1142	EELQLCkGLVQAL
14	ACLDTAVENMPSLKMK	1	P49327	FASN	1239	ENMPSLkMKVVEV
17	DGLLENQTPEFFQDVCKPK	1	P49327	FASN	1993	FFQDVCkPKYSGT
6	EGVFAKEVR	2	P49327	FASN	673	KEGVFAkEVRTGG
11	FDASFFGVHPKQAHTMDPQLR	3	P49327	FASN	70	FFGVHPkQAHTMD
8	HFLLEEDKPEEPTAHAFVSTLTR	1	P49327	FASN	1523	FLLEEDkPEEPTA
1	KDHRDNLEFFLAGIGR	3	P49327	FASN	787	IIPLMKkDHRDNL
1	KLQELSSK	1	P49327	FASN	2186	RQLTLRkLQELSS
11	LGMLSPEGTCKAFDTAGNGYCR	1	P49327	FASN	213	SPEGTCkAFDTAG
2	QKLYTLQDK	1	P49327	FASN	1065	PATHRQkLYTLQD
6	SDEAVKPFGLK	1	P49327	FASN	528	RSDEAVkPFGLKV
12	SEGVVAVLLTKK	1	P49327	FASN	236	AVLLTKkSLARRV
24	SLYQSAGVAPESFEYIEAHGTGTKVGDPQELNGITR	1	P49327	FASN	298	AHGTGTkVGDPQE
7	TPEAVQKLLEQGLR	2	P49327	FASN	436	TPEAVQkLLEQGL
10	VFTTVGSAEKR	1	P49327	FASN	1704	TVGSAEkRAYLQA
7	VTQQGLKMVVPGLDGAQIPRDPSQQELPR	2	P49327	FASN	1158	VTQQGLkMVVPGL
15	VVVQVLAEEPEAVLKGAKPK	1	P49327	FASN	1866	EPEAVLkGAKPKL
2	WKAGLYGLPR	2	P49327	FASN	41	DDDRRWkAGLYGL
1	KATEGSGSMR	1	O94874	UFL1	424	KDERRRkATEGSG
5	ASVEKGDYYEAHQMYR	1	Q7L5D6	GET4	36	LRASVEkGDYYEA
6	YMSQSKHTEAR	1	Q7L5D6	GET4	58	RYMSQSkHTEARE
5	VLMEKELPGFLQSGK	1	P25815	S100P	39	LKVLMEkELPGFL
1	KCTENDIR	1	Q92879	CELF1	118	IGMISKkCTENDI
2	SKNDSKPY	1	Q92879	CELF1	480	VQLKRSkNDSKPY
1	KHSVSTSDRNQEER	1	Q9H8H2	DDX31	183	KMFSPKkHSVSTS
9	AVYDTNPAKFR	2	Q9NZD2	GLTP	66	YDTNPAkFRTLQN
1	KSEYTQPTPIQCQGVPVALSGR	1	Q86XP3	DDX42	270	LMHQIRkSEYTQP
4	AVPKEDIYSGGGGGGSR	3	Q13151	HNRNPA0	176	VKKAVPkEDIYSG
1	KAVPKEDIYSGGGGGGSR	1	Q13151	HNRNPA0	172	HRVEVKkAVPKED
1	KIWLGLFDAR	1	O95081	AGFG2	109	GNEVCRkIWLGLF
7	NIVAAMKAHGVDK	1	P30043	BLVRB	99	NIVAAMkAHGVDK
15	VVACTSAFLLWDPTKVPPR	3	P30043	BLVRB	120	LLWDPTkVPPRLQ
1	KAIQESNDTNKGK	1	Q8TCD1	C18orf32	39	SRIWPKkAIQESN
6	ADVVPKTAENFR	1	P30405	PPIF	73	KADVVPkTAENFR
7	ALCTGEKGFGYK	1	P30405	PPIF	86	ALCTGEkGFGYKG
1	KIESFGSK	2	P30405	PPIF	183	GMDVVKkIESFGS
1	KIVITDCGQLS	1	P30405	PPIF	197	SGRTSKkIVITDC
7	TDWLDGKHVVFGHVK	2	P30405	PPIF	167	TDWLDGkHVVFGH
6	VVLELKADVVPK	2	P30405	PPIF	67	RVVLELkADVVPK
7	IEGLAPKLDPEEMKR	1	Q8N4H5	TOMM5	10	IEGLAPkLDPEEM
9	ESYSVYVYKVLK	2	Q5QNW6	H2BC18	44	YSVYVYkVLKQVH
8	HAVSEGTKAVTK	2	Q5QNW6	H2BC18	117	AVSEGTkAVTKYT
1	KESYSVYVYK	3	Q5QNW6	H2BC18	35	KRKRSRkESYSVY
6	LAHYNKR	1	Q5QNW6	H2BC18	86	RLAHYNkRSTITS
9	LLLPGELAKHAVSEGTK	6	Q5QNW6	H2BC18	109	LPGELAkHAVSEG
11	QVHPDTGISSKAMGIMNSFVNDIFER	1	Q5QNW6	H2BC18	58	DTGISSkAMGIMN
3	VLKQVHPDTGISSK	1	Q5QNW6	H2BC18	47	YVYKVLkQVHPDT
7	VLLVGLKGLGAEIAK	1	Q9UBE0	SAE1	45	VLLVGLkGLGAEI
12	VSQGVEDGPDTKR	3	Q9UBE0	SAE1	195	EDGPDTkRAKLDS
6	ESQAAKDLLYRR	1	Q9UNH7	SNX6	307	RESQAAkDLLYRR
1	KNLVELAELELK	2	Q9UNH7	SNX6	375	RVAAFRkNLVELA
3	SHKSAADDYNR	2	Q9UNH7	SNX6	239	RMTRSHkSAADDY
2	AKVGELKDDDFER	1	P36507	MAP2K2	63	FLTQKAkVGELKD
4	CLIKNPAER	1	P36507	MAP2K2	352	VNKCLIkNPAERA
8	MALETVPKDLR	1	P63272	SUPT4H1	8	ALETVPkDLRHLR
2	LKAELAR	1	Q96P11	NSUN5	103	RHQARLkAELARL
6	ANDLVKYLLAK	3	Q9UNF1	MAGED2	288	RANDLVkYLLAKD
8	QAVELLGKASR	1	Q99747	NAPG	159	AVELLGkASRLLV
1	KLGSSLDWDR	1	P26640	VARS1	433	IYHQLKkLGSSLD
2	QKIQQQQPPPGEK	1	P26640	VARS1	252	KFQQKQkIQQQQP
1	KIEISQHAK	1	P61513	RPL37A	28	LRKMVKkIEISQH
6	VGIVGKYGTR	1	P61513	RPL37A	13	KVGIVGkYGTRYG
9	GTGANGSFKLNR	1	Q92522	H1-10	115	GANGSFkLNRKKL
1	KVPWFDQQNGR	1	Q92522	H1-10	76	IYTEAKkVPWFDQ
5	NQPGKYSQLVVETIR	1	Q92522	H1-10	47	KKNQPGkYSQLVV
4	TYLKYSIK	1	Q92522	H1-10	90	NGRTYLkYSIKAL
1	KTPGPPFGTQIWKGLCIESK	1	Q6Q759	SPAG17	1728	FPSVEKkTPGPPF
13	KTPGPPFGTQIWKGLCIESK	1	Q6Q759	SPAG17	1740	FGTQIWkGLCIES
1	KLAQQYYLVYQEPIPTAQLVQR	1	P25787	PSMA2	92	LVHRARkLAQQYY
3	KQKSILYDER	2	P25787	PSMA2	53	ATEKKQkSILYDE
1	KQKSILYDER	1	P25787	PSMA2	51	VLATEKkQKSILY
6	NYVNGKTFLEK	3	P25787	PSMA2	171	KNYVNGkTFLEKR
10	SVHKVEPITKHIGLVYSGMGPDYR	3	P25787	PSMA2	70	KVEPITkHIGLVY
6	AAAYSKLGNYAGAVQDCER	1	O43765	SGTA	137	RAAAYSkLGNYAG
1	KALELDPDNETYKSNLK	1	O43765	SGTA	184	AVAYYKkALELDP
9	AAASTDYYKR	1	P08559	PDHA1	244	ASTDYYkRGDFIP
2	SKSDPIMLLKDR	1	P08559	PDHA1	313	IQEVRSkSDPIML
8	ELDIMEPKVPDDIYKTHLENNR	2	Q13200	PSMD2	343	LDIMEPkVPDDIY
15	ELDIMEPKVPDDIYKTHLENNR	2	Q13200	PSMD2	350	VPDDIYkTHLENN
4	LGEKDTSLYRPALEELRR	1	Q13200	PSMD2	66	VERLGEkDTSLYR
8	MEEGGRDKAPVQPQQSPAAAPGGTDEKPSGK	1	Q13200	PSMD2	8	EEGGRDkAPVQPQ
13	VGQAVDVVGQAGKPK	1	Q13200	PSMD2	858	VVGQAGkPKTITG
12	NSMPASSFQQQKLR	1	Q9NQ29	LUC7L	186	SSFQQQkLRVCEV
10	VHELNEEIGKLLAK	1	Q9NQ29	LUC7L	135	LNEEIGkLLAKAE
8	ASHGYGGKFGVEQDR	1	Q14247	CTTN	87	SHGYGGkFGVEQD
9	EKELETGPKASHGYGGK	1	Q14247	CTTN	79	ELETGPkASHGYG
9	HESQQDYSKGFGGK	1	Q14247	CTTN	304	SQQDYSkGFGGKY
1	KLEEQAR	1	Q14247	CTTN	390	QEEARRkLEEQAR
3	LAKHESQQDYSK	3	Q14247	CTTN	295	YKEKLAkHESQQD
3	MDKNASTFEDVTQVSSAYQK	1	Q14247	CTTN	319	QKDRMDkNASTFE
3	TEKHESQRDYSK	1	Q14247	CTTN	184	YQGKTEkHESQRD
6	TGFGGKFGVQSER	1	Q14247	CTTN	272	KTGFGGkFGVQSE
10	TVPVEAVTSKTSNIR	1	Q14247	CTTN	346	VEAVTSkTSNIRA
13	VDQSAVGFEYQGKTEK	1	Q14247	CTTN	144	GFEYQGkTEKHAS
2	FKDPGLVDQLVK	1	P49591	SARS1	28	TQEKRFkDPGLVD
3	VDKGGDPALIR	1	P49591	SARS1	12	DLFRVDkGGDPAL
1	KLDPPGGQFYNSK	1	O95400	CD2BP2	321	DGVYCRkLDPPGG
3	INKELSDLAR	2	P61077	UBE2D3	8	ALKRINkELSDLA
1	KLKSAPDQEVR	2	P36405	ARL3	9	LLSILRkLKSAPD
3	KLKSAPDQEVR	1	P36405	ARL3	11	SILRKLkSAPDQE
5	TTLLKQLASEDISHITPTQGFNIK	1	P36405	ARL3	35	GKTTLLkQLASED
1	KADPDAAHRPR	1	Q6P6C2	ALKBH5	328	PKRSHRkADPDAA
3	EGKSAADAR	1	Q9H0C8	ILKAP	356	IQTREGkSAADAR
1	KTQETLSQAGQK	3	O43399	TPD52L2	128	QSDLYKkTQETLS
12	KTQETLSQAGQKTSAALSTVGSAISR	1	O43399	TPD52L2	139	LSQAGQkTSAALS
7	LGEWNEKVTQSDLYK	3	O43399	TPD52L2	119	LGEWNEkVTQSDL
10	LGLSTLGELKQNLSR	10	O43399	TPD52L2	90	STLGELkQNLSRS
6	NSATFKSFEDR	1	O43399	TPD52L2	165	RNSATFkSFEDRV
6	QVLAAKER	1	O43399	TPD52L2	70	RQVLAAkERHCGE
2	SKVVGDRENGSDNLPSSAGSGDKPLSDPAPF	1	O43399	TPD52L2	177	VGTIKSkVVGDRE
13	SWHDVQVSSAYVKTSEK	2	O43399	TPD52L2	108	VSSAYVkTSEKLG
4	TSEKLGEWNEK	1	O43399	TPD52L2	112	YVKTSEkLGEWNE
1	KASAAQLR	1	P61081	UBE2M	26	TKGSSKkASAAQL
3	IQKDINELNLPK	1	P61081	UBE2M	36	AQLRIQkDINELN
3	SGKFVFSFK	1	P61081	UBE2M	75	GFYKSGkFVFSFK
5	SVSSKGQPSPR	1	Q9HC35	EML4	69	KKSVSSkGQPSPR
1	KPQLDVTR	1	Q15050	RRS1	279	RVMNSKkPQLDVT
7	LDLLMQKIGMR	1	Q9GZR7	DDX24	541	LDLLMQkIGMRGK
3	FWKGPSEAPSGQA	1	Q9NY33	DPP3	727	ADARFWkGPSEAP
5	LQVLKSTGDVAGGR	1	Q9NY33	DPP3	629	RRLQVLkSTGDVA
3	IHKELDHPR	1	Q86UE8	TLK2	519	REYRIHkELDHPR
11	VGMIPVPYVEK	1	P46109	CRKL	180	PVPYVEkLVRSSP
1	KHVLYVEHR	1	Q9BQ70	TCF25	175	APLSSRkHVLYVE
1	KLAAAEGLEPK	4	Q6NXS1	PPP1R2B	103	PDILAKkLAAAEG
11	KLAAAEGLEPKYR	1	Q6NXS1	PPP1R2B	113	AEGLEPkYRIQEQ
4	LCEKCDGK	1	Q7RTV0	PHF5A	25	IGRLCEkCDGKCV
6	AMQSLKSR	1	P46783	RPS10	53	KAMQSLkSRGYVK
4	GYVKEQFAWR	2	P46783	RPS10	59	KSRGYVkEQFAWR
1	KAEAGAGSATEFQFR	3	P46783	RPS10	139	PPGADKkAEAGAG
9	SAVPPGADKKAEAGAGSATEFQFR	1	P46783	RPS10	138	VPPGADkKAEAGA
8	FHADSVCKASNR	2	Q9BW61	DDA1	26	HADSVCkASNRRP
5	TSPAKQQAPPVR	1	Q16555	DPYSL2	525	AKTSPAkQQAPPV
9	SHYEEGPGKNLPFSVENK	2	P15954	COX7C	25	YEEGPGkNLPFSV
9	AVDSQILPKIK	1	Q02878	RPL6	260	DSQILPkIKAIPQ
8	HLTDAYFKK	1	Q02878	RPL6	218	LTDAYFkKKKLRK
13	HQEGEIFDTEKEKYEITEQR	1	Q02878	RPL6	239	FDTEKEkYEITEQ
5	KIDQKAVDSQILPK	3	Q02878	RPL6	251	QRKIDQkAVDSQI
1	KIDQKAVDSQILPK	2	Q02878	RPL6	247	EITEQRkIDQKAV
7	IDISNVKIPK	3	Q02878	RPL6	207	IDISNVkIPKHLT
2	IKAIPQLQGYLR	3	Q02878	RPL6	262	QILPKIkAIPQLQ
3	IPKHLTDAYFK	1	Q02878	RPL6	210	SNVKIPkHLTDAY
7	VLATVTKPVGGDK	2	Q02878	RPL6	94	VLATVTkPVGGDK
13	VLATVTKPVGGDKNGGTR	2	Q02878	RPL6	100	KPVGGDkNGGTRV
1	KDDPTLLSSGR	1	P22061	PCMT1	125	SVNNVRkDDPTLL
2	EKAGGPQLDR	1	Q6PJG2	MIDEAS	169	EALKREkAGGPQL
2	LKNITLDDASAPR	2	O75534	CSDE1	758	RLVNRLkNITLDD
2	IKVDFVIPK	1	O75534	CSDE1	288	PLPGRIkVDFVIP
3	NGKEVATDVR	1	O75534	CSDE1	239	IKDRNGkEVATDV
3	TGKPIAVK	1	O75534	CSDE1	81	SDRRTGkPIAVKL
4	VPSKNQNDPLPGR	1	O75534	CSDE1	277	IPKVPSkNQNDPL
4	GQQKIQSQQK	1	Q9Y5V0	ZNF706	7	MARGQQkIQSQQK
2	EKDTAVQGNIR	1	Q9UBV8	PEF1	260	TEAFREkDTAVQG
4	VFDKEGNGTVMGAELR	2	P08590	MYL3	142	GLRVFDkEGNGTV
1	KLPDFLTAK	1	Q9BZZ5	API5	356	FHQLGRkLPDFLT
1	KAQPAQPADEPAEKADEPMEH	1	P25786	PSMA1	243	EERPQRkAQPAQP
8	LVSLIGSKTQIPTQR	4	P25786	PSMA1	115	VSLIGSkTQIPTQ
10	LVNTSENLSKSR	1	Q9UEU0	VTI1B	190	TSENLSkSRKILR
11	GVTECYECHPKPTQR	2	Q9UBT2	UBA2	164	CYECHPkPTQRTF
1	KLSEFGIR	1	Q9UBT2	UBA2	505	EANNHKkLSEFGI
4	LFSKSIETLR	1	Q9UBT2	UBA2	324	YARLFSkSIETLR
7	YLLTMDKLWR	3	Q9UBT2	UBA2	271	YLLTMDkLWRKRK
3	HNKPEVEVR	1	P59998	ARPC4	35	VVERHNkPEVEVR
1	KPVEGYDISFLITNFHTEQMYK	2	P59998	ARPC4	107	FFILRRkPVEGYD
3	SSKELLLQPVTISR	3	P59998	ARPC4	44	VEVRSSkELLLQP
17	GLPLVDDGGWNTVPISKGSRPIDTSR	1	Q04637	EIF4G1	1059	NTVPISkGSRPID
1	KAASLTEDRDR	1	Q04637	EIF4G1	1206	QPEGLRkAASLTE
1	KVGTLWR	1	Q04637	EIF4G1	1391	KSMGPKkVGTLWR
3	LLKEGSSNQR	2	Q04637	EIF4G1	1452	QLEKLLkEGSSNQ
3	ITKPGSIDSNNQLFAPGGR	2	Q04637	EIF4G1	1074	RLTKITkPGSIDS
5	SDQWKPLNLEEK	1	Q04637	EIF4G1	602	YKSDQWkPLNLEE
1	KIENLCAMGFDR	1	P61086	UBE2K	165	SPEYTKkIENLCA
7	QNPEMFKQTAR	1	P61086	UBE2K	142	QNPEMFkQTARLW
1	KFTNKEWETIR	1	Q9NRN7	AASDHPPT	151	FHIMKRkFTNKEW
7	SIQPEEKER	1	Q9NRN7	AASDHPPT	45	SIQPEEkERIGQF
4	ALLKDQQPGTFLLR	1	P42224	STAT1	592	RERALLkDQQPGT
1	KILENAQR	1	P42224	STAT1	114	CLKEERkILENAQ
9	GFSIPECQKLLPK	1	O75390	CS	103	SIPECQkLLPKAK
3	GMKGLVYETSVLDPDEGIR	2	O75390	CS	76	GGMRGMkGLVYET
22	RQNQQSSSDSGSSSSSEDERPKR	1	Q8IYB3	SRRM1	508	SEDERPkRSHVKN
5	RSHVKNGEVGR	1	Q8IYB3	SRRM1	513	PKRSHVkNGEVGR
1	KLMTTNEIQSNIYT	1	O95456	PSMG1	275	STEILKkLMTTNE
11	MAATFFGEVVKAPCR	1	O95456	PSMG1	11	FFGEVVkAPCRAG
1	KTDPSGLSK	1	Q13740	ALCAM	423	QIKMTKkTDPSGL
3	TAKDALSSVQESQVAQQAR	1	P02656	APOC3	44	HATKTAkDALSSV
10	FNVIQPGPIKTK	1	Q16698	DECR1	244	IQPGPIkTKGAFS
9	LDPTGTFEKEMIGR	1	Q16698	DECR1	260	PTGTFEkEMIGRI
2	QKELSEK	1	Q15046	KARS1	41	EKEAKQkELSEKQ
14	MAPSVPAAEPEYPK	1	P54819	AK2	14	AEPEYPkGIRAVL
1	KFDLGQDVIDFTGHALALYR	1	P31150	GDI1	174	MRDVYRkFDLGQD
1	KQNDVFGEAEQ	1	P31150	GDI1	437	FENMKRkQNDVFG
2	IKLYSESLAR	1	P31150	GDI1	210	ETVNRIkLYSESL
12	MAGTAFDFENMKR	4	P31150	GDI1	435	FDFENMkRKQNDV
12	VVEGSFVYKGGK	1	P31150	GDI1	115	FVYKGGkIYKVPS
5	VVGVKSEGEVAR	1	P31150	GDI1	269	GKVVGVkSEGEVA
3	YGKSPYLYPLYGLGELPQGFAR	1	P31150	GDI1	221	SLARYGkSPYLYP
2	VKHFLNITDPR	2	Q96NB2	SFXN2	25	TFLGRVkHFLNIT
5	VMVEKSR	1	Q96NB2	SFXN2	52	AKVMVEkSRMGVV
13	MFRCGGLAAGALKQK	1	O95831	AIFM1	13	LAAGALkQKLVPL
1	KKEELLK	3	P42766	RPL35	13	RDLRGKkKEELLK
2	KKEELLK	1	P42766	RPL35	14	DLRGKKkEELLKQ
3	LNKHEENLK	3	P42766	RPL35	97	MRRRLNkHEENLK
6	QLDDLKVELSQLR	6	P42766	RPL35	25	KQLDDLkVELSQL
10	RLNKHEENLK	1	P42766	RPL35	103	KHEENLkTKKQQR
3	VAKVTGGAASK	1	P42766	RPL35	35	SQLRVAkVTGGAA
10	VLTVINQTQKENLR	3	P42766	RPL35	66	VINQTQkENLRKF
8	VTGGAASKLSK	1	P42766	RPL35	43	TGGAASkLSKIRV
5	GLDGKVICGSR	1	Q16629	SRSF7	70	VRGLDGkVICGSR
12	VYVGNLGTGAGKGELER	1	Q16629	SRSF7	24	LGTGAGkGELERA
6	YGGETKVYVGNLGTGAGKGELER	1	Q16629	SRSF7	12	RYGGETkVYVGNL
1	KLAVNMVPFPR	7	P04350	TUBB4A	252	LNADLRkLAVNMV
17	MAATFIGNSTAIQELFKR	1	P04350	TUBB4A	379	AIQELFkRISEQF
4	DTGKTPVEPEVAIHR	4	P60866	RPS20	8	AFKDTGkTPVEPE
1	KTPCGEGSKTWDR	2	P60866	RPS20	67	LRITTRkTPCGEG
9	KTPCGEGSKTWDR	2	P60866	RPS20	75	PCGEGSkTWDRFQ
12	LIDLHSPSEIVK	2	P60866	RPS20	99	SPSEIVkQITSIS
21	VIAINVDDPDAANYNDINDVKR	1	Q15181	PPA1	176	NDINDVkRLKPGY
3	AGKVEAQHILASAPTDR	1	Q53H96	PYCR3	32	GLIRAGkVEAQHI
2	EKNGNEEGEER	1	Q5JPE7	NOMO2	723	RRQEREkNGNEEG
1	KQVEIAQR	1	P00966	ASS1	101	RPCIARkQVEIAQ
9	YVSHGATGKGNDQVR	1	P00966	ASS1	121	SHGATGkGNDQVR
8	AFLIEEQKIVVK	2	P49207	RPL34	101	FLIEEQkIVVKVL
9	LSYNTASNKTR	1	P49207	RPL34	19	YNTASNkTRLSRT
4	IVVKVLK	1	P49207	RPL34	105	EQKIVVkVLKAQA
7	IVYLYTKK	1	P49207	RPL34	36	IVYLYTkKVGKAP
15	DGDFENPVPYTGAVKVGAIQR	1	P30040	ERP29	137	PYTGAVkVGAIQR
15	FDTQYPYGEKQDEFKR	1	P30040	ERP29	74	EKQDEFkRLAENS
12	GALPLDTVTFYKVIPK	1	P30040	ERP29	48	DTVTFYkVIPKSK
1	KGAEKEEL	1	P30040	ERP29	254	LTAFQKkGAEKEE
1	KWAEQYLK	2	P30040	ERP29	197	VKETQKkWAEQYL
4	IMGKILDQGEDFPASEMTR	1	P30040	ERP29	208	YLKIMGkILDQGE
6	MSDGKKEELQK	1	P30040	ERP29	238	KMSDGKkEELQKS
5	QALLKQGQDNLSSVK	1	P30040	ERP29	182	ARQALLkQGQDNL
10	QGQDNLSSVKETQKK	1	P30040	ERP29	192	DNLSSVkETQKKW
2	SKFVLVK	1	P30040	ERP29	54	KVIPKSkFVLVKF
10	SLNILTAFQKK	1	P30040	ERP29	253	ILTAFQkKGAEKE
7	WAEQYLKIMGK	1	P30040	ERP29	204	WAEQYLkIMGKIL
1	KYGLNMCR	2	P62273	RPS29	33	RHGLIRkYGLNMC
4	QYAKDIGFIKLD	5	P62273	RPS29	48	CFRQYAkDIGFIK
5	LFVDKIR	1	P18859	ATP5PF	46	QKLFVDkIREYKS
9	AAIAQLNGKEVK	1	Q96PK6	RBM14	135	IAQLNGkEVKGKR
1	KLGELTGTVK	1	O43615	TIMM44	121	SEVLRKkLGELTG
3	TAKQSAESVSK	1	O43615	TIMM44	157	EAAKTAkQSAESV
6	SLVLVKQFRPAVYAGEVER	1	O95848	NUDT14	59	RSLVLVkQFRPAV
3	VLKEIVER	1	Q14444	CAPRIN1	234	TTYKVLkEIVERV
4	SGNKECPTCR	1	Q99496	RNF2	85	ALRSGNkECPTCR
7	EIAQEFKTDLR	3	Q5TEC6	H3-7	80	EIAQEFkTDLRFQ
4	RYQKSTELLIR	2	Q5TEC6	H3-7	57	EIRRYQkSTELLI
1	KLDSELTAR	1	O60610	DIAPH1	487	AAELEKkLDSELT
3	EVKLLLLGAGESGK	1	P04899	GNAI2	35	KAAREVkLLLLGA
5	CAQYKKDGADFAK	1	P09972	ALDOC	139	ERCAQYkKDGADF
7	CQYVTEKVLAAVYK	1	P09972	ALDOC	208	CQYVTEkVLAAVY
7	DGADFAKWR	2	P09972	ALDOC	147	DGADFAkWRCVLK
1	KDGADFAK	2	P09972	ALDOC	140	RCAQYKkDGADFA
3	VDKGVVPLAGTDGETTTQGLDGLSER	8	P09972	ALDOC	111	VGIKVDkGVVPLA
27	YASICQQNGIVPIVEPEILPDGDHDLKR	1	P09972	ALDOC	200	DGDHDLkRCQYVT
2	QKIGLSDAR	1	Q9BY77	POLDIP3	59	RFDARQkIGLSDA
5	IVSQKQMSDR	1	P62491	RAB11A	179	YRIVSQkQMSDRR
3	TIKAQIWDTAGQER	3	P62491	RAB11A	61	VDGKTIkAQIWDT
7	GVVVLAKSYNEQR	2	P52895	AKR1C2	270	GVVVLAkSYNEQR
8	LLEMILNKPGLK	2	P52895	AKR1C2	179	LEMILNkPGLKYK
22	LNDGHFMPVLGFGTYAPAEVPKSK	2	P52895	AKR1C2	31	APAEVPkSKALEA
24	LNDGHFMPVLGFGTYAPAEVPKSK	1	P52895	AKR1C2	33	AEVPKSkALEAVK
2	SKIADGSVK	1	P52895	AKR1C2	68	GLAIRSkIADGSV
11	EAKPDELMDSKLR	1	Q9P0L0	VAPA	125	DELMDSkLRCVFE
1	KLMEECKR	2	Q9P0L0	VAPA	174	NDTETRkLMEECK
10	MASASGAMAKHEQILVLDPPTDLK	2	Q9P0L0	VAPA	10	ASGAMAkHEQILV
2	AKLAIWDTAGQER	1	Q9NP72	RAB18	58	VDGNKAkLAIWDT
3	SHKAESSELVR	2	Q9NXG6	P4HTM	265	KYMRSHkAESSEL
4	EASKQADVNLVNAK	1	O43175	PHGDH	384	LLKEASkQADVNL
1	KILQDGGLQVVEK	2	O43175	PHGDH	21	LDPCCRkILQDGG
10	QADVNLVNAKLLVK	1	O43175	PHGDH	394	VNLVNAkLLVKEA
4	SATKVTADVINAAEK	1	O43175	PHGDH	58	IVRSATkVTADVI
11	VTADVINAAEKLQVVGR	1	O43175	PHGDH	69	VINAAEkLQVVGR
13	DADVQNFVSFISKDSIQK	4	P42126	ECI1	283	FVSFISkDSIQKS
5	IWSTKDFLQR	1	Q9Y4P3	TBL2	120	IRIWSTkDFLQRE
10	MAEPSAPESKHK	1	Q8TCJ2	STT3B	10	PSAPESkHKSSLN
1	KLSEATR	1	Q13098	GPS1	97	YEEIHRkLSEATR
14	IIAFVGSPVEDNEKDLVK	1	P55036	PSMD4	122	PVEDNEkDLVKLA
15	LQAQQDAVNIVCHSKTR	1	P55036	PSMD4	40	NIVCHSkTRSNPE
2	EKLAELR	1	Q9Y4L1	HYOU1	797	TVMLKEkLAELRK
8	YFQHLLGKQADNPHVALYQAR	1	Q9Y4L1	HYOU1	106	FQHLLGkQADNPH
9	TCATDLQTKADR	1	O95861	BPNT1	49	ATDLQTkADRLAQ
2	NKSYSFIAR	1	Q8IWX8	CHERP	901	ENYRRNkSYSFIA
1	KADGYNQPDSK	3	O43390	HNRNPR	574	NVGGKRkADGYNQ
11	KADGYNQPDSKR	2	O43390	HNRNPR	584	YNQPDSkRRQTNN
4	QGSKVQESTKGPDEAK	1	O43390	HNRNPR	114	REKQGSkVQESTK
9	SAFLCGVMKTYR	1	O43390	HNRNPR	103	FLCGVMkTYRQRE
6	VQESTKGPDEAK	1	O43390	HNRNPR	120	KVQESTkGPDEAK
1	KTLEEAIR	1	P50995	ANXA11	320	YKAEFKkTLEEAI
20	MAANATTNPSQLLPLELVDKCIGSR	1	Q9Y4Y9	LSM5	20	PLELVDkCIGSRI
2	AKDGLVVFGK	1	Q12765	SCRN1	18	AFPPRAkDGLVVF
4	SIFKPFIFVDDVK	1	Q12765	SCRN1	306	PSRSIFkPFIFVD
4	VTDKLTPIHDR	1	P28072	PSMB6	67	ANRVTDkLTPIHD
1	KLTPEQFYVTR	1	Q9Y3D2	MSRB2	57	KSEWQKkLTPEQF
1	KIGLETVGVK	2	Q16881	TXNRD1	449	RDACTRkIGLETV
6	IICNTKDNER	1	Q16881	TXNRD1	580	KIICNTkDNERVV
6	QFVPIKVEQIEAGTPGR	1	Q16881	TXNRD1	405	RQFVPIkVEQIEA
3	FVKKPDDGK	1	Q04760	GLO1	151	LGVKFVkKPDDGK
1	KSLDFYTR	2	Q04760	GLO1	44	RVKDPKkSLDFYT
8	RFEELGVKFVK	1	Q04760	GLO1	148	FEELGVkFVKKPD
2	AKIAEQVASFQEEK	1	P35221	CTNNA1	683	PQEQKAkIAEQVA
1	KHVNPVQALSEFK	1	P35221	CTNNA1	889	KRASQKkHVNPVQ
1	KLGQSESQGPPR	1	O00233	PSMD9	123	KEAMSRkLGQSES
5	ECEIKYTGFR	2	Q13951	CBFB	28	SRECEIkYTGFRD
2	SKFENEEFFR	1	Q13951	CBFB	11	VPDQRSkFENEEF
7	DLAACIKGLPNVQR	3	O75874	IDH1	381	DLAACIkGLPNVQ
2	FKDIFQEIYDKQYK	1	O75874	IDH1	224	KYDGRFkDIFQEI
7	IIWELIKEK	1	O75874	IDH1	27	IIWELIkEKLIFP
7	LVSGWVKPIIIGR	1	O75874	IDH1	126	LVSGWVkPIIIGR
4	MYQKGQETSTNPIASIFAWTR	3	O75874	IDH1	321	HYRMYQkGQETST
5	LSDFKQVLLR	1	Q9P2I0	CPSF2	725	PRLSDFkQVLLRE
1	KIIGDTFVK	1	P49915	GMPS	338	SPEEKRkIIGDTF
3	ISKTLNMTTSPEEK	1	P49915	GMPS	325	PRKRISkTLNMTT
11	TLNMTTSPEEKRK	1	P49915	GMPS	336	TTSPEEkRKIIGD
2	DKDAKFR	1	P62277	RPS13	109	ERNRKDkDAKFRL
5	DKDAKFR	1	P62277	RPS13	112	RKDKDAkFRLILI
6	FVTGNKILR	3	P62277	RPS13	70	RFVTGNkILRILK
1	KGLTPSQIGVILR	2	P62277	RPS13	43	IYKLAKkGLTPSQ
3	ILKSKGLAPDLPEDLYHLIK	2	P62277	RPS13	76	KILRILkSKGLAP
5	ILKSKGLAPDLPEDLYHLIK	2	P62277	RPS13	78	LRILKSkGLAPDL
7	LTSDDVKEQIYK	2	P62277	RPS13	34	LTSDDVkEQIYKL
12	LTSDDVKEQIYKLAK	1	P62277	RPS13	39	VKEQIYkLAKKGL
7	SVPTWLKLTSDDVKEQIYK	3	P62277	RPS13	27	SVPTWLkLTSDDV
2	AKTDAGGEDAILQTR	1	Q9NT62	ATG3	185	VEACKAkTDAGGE
9	MQNVINTVKGK	2	Q9NT62	ATG3	9	NVINTVkGKALEV
2	FKTGAFSER	1	Q86YS6	RAB43	39	CVVQRFkTGAFSE
2	VKLQIWDTAGQER	1	Q86YS6	RAB43	68	IQGKRVkLQIWDT
3	LVKDVFISAAERDVYTGDALR	1	P20618	PSMB1	204	RAMRLVkDVFISA
14	MAADISESSGADCKGDPR	2	O43583	DENR	14	SSGADCkGDPRNS
3	QLKAEVIAK	1	P43246	MSH2	912	IKLKQLkAEVIAK
1	KPHTESLELQVR	1	Q9BSJ8	ESYT1	855	ASFLIRkPHTESL
12	QLLDDEEQLTAKTLYMSHR	1	Q9BSJ8	ESYT1	118	EEQLTAkTLYMSH
1	KIRLESEEEGVPSTAIR	1	P06493	CDK1	34	QVVAMKkIRLESE
1	KPLFHGDSEIDQLFR	2	P06493	CDK1	201	AELATKkPLFHGD
11	IGEGTYGVVYKGR	1	P06493	CDK1	20	TYGVVYkGRHKTT
1	KQVCDDISR	2	Q9HD15	SRA1	131	CRGHTRkQVCDDI
4	VSEKEKESIAR	1	Q86Y82	STX12	127	QRRVSEkEKESIA
2	DKLTELQLR	1	Q7Z7H5	TMED4	152	EIAAKDkLTELQL
8	MALFAGGKLR	1	Q7Z7H5	TMED4	128	ALFAGGkLRVHLD
8	ALEAVFGKYGR	1	P38159	RBMX	30	LEAVFGkYGRIVE
3	AIKVEQATKPSFESGR	2	P38159	RBMX	80	LDGKAIkVEQATK
9	AIKVEQATKPSFESGR	2	P38159	RBMX	86	KVEQATkPSFESG
7	DDGYSTKDSYSSR	3	P38159	RBMX	217	DDGYSTkDSYSSR
14	GFAFVTFESPADAKDAAR	2	P38159	RBMX	63	ESPADAkDAARDM
13	LFIGGLNTETNEKALEAVFGK	1	P38159	RBMX	22	NTETNEkALEAVF
9	MVEADRPGKLFIGGLNTETNEK	3	P38159	RBMX	9	EADRPGkLFIGGL
5	DYVQKAQTK	2	P35580	MYH10	410	GRDYVQkAQTKEQ
2	EKETKALSLAR	1	P35580	MYH10	1481	EAEAREkETKALS
5	EKETKALSLAR	1	P35580	MYH10	1484	AREKETkALSLAR
2	FKANLEK	1	P35580	MYH10	1219	EQAKRFkANLEKN
2	FKATISALEAK	1	P35580	MYH10	1813	AVKSKFkATISAL
6	HADQYKEQMEK	1	P35580	MYH10	1869	RHADQYkEQMEKA
1	KFDQLLAEEK	2	P35580	MYH10	1452	LEKKQKkFDQLLA
1	KLDAQVQELHAK	1	P35580	MYH10	1256	SEHKRKkLDAQVQ
2	QKLQLEK	1	P35580	MYH10	968	EEGARQkLQLEKV
1	KFDDENFILK	2	Q9UNP9	PPIE	218	KSIYGKkFDDENF
21	AALEALGSCLNNKYSEGYPGKR	2	P34897	SHMT2	103	SEGYPGkRYYGGA
21	IMGLDLPDGGHLTHGYMSDVKR	1	P34897	SHMT2	181	GYMSDVkRISATS
5	LQDFKSFLLK	3	P34897	SHMT2	469	AKLQDFkSFLLKD
5	SFLLKDSETSQR	1	P34897	SHMT2	474	FKSFLLkDSETSQ
11	VLELVSITANKNTCPGDR	2	P34897	SHMT2	409	VSITANkNTCPGD
6	LIFAGKQLEDGR	2	P62987	UBA52	48	RLIFAGkQLEDGR
5	QLAQKYNCDK	2	P62987	UBA52	88	LRQLAQkYNCDKM
5	YNCDKMICR	2	P62987	UBA52	93	QKYNCDkMICRKC
1	KYDYNPSFAIR	1	Q9H857	NT5DC2	109	YPEGIRkYDYNPS
10	ALGDLISATKAAAGK	2	Q9Y490	TLN1	2099	DLISATkAAAGKV
12	ALSTDPAAPNLKSQLAAAAR	1	Q9Y490	TLN1	1332	PAAPNLkSQLAAA
1	KAAGHPGDPESQQR	2	Q9Y490	TLN1	1171	LIEEAKkAAGHPG
2	VKADQDSEAMKR	1	Q9Y490	TLN1	2445	LVACKVkADQDSE
6	AMELLKVSK	4	Q9Y3U8	RPL36	62	RAMELLkVSKDKR
10	RAMELLKVSK	1	Q9Y3U8	RPL36	65	ELLKVSkDKRALK
9	TPEASPEPKDQTLK	1	Q99460	PSMD1	319	EASPEPkDQTLKM
7	VMPAQLKVLTMPETCR	2	Q99460	PSMD1	890	VMPAQLkVLTMPE
2	EKQPPIDNIIR	1	P52292	KPNA2	108	KLLSREkQPPIDN
15	IEDLSQQAQLAAAEKFK	4	Q13765	NACA	142	QLAAAEkFKVQGE
23	KIYQNIQDGSLDLNAAESGVQHKPSAPQGGR	1	P61106	RAB14	193	ESGVQHkPSAPQG
8	IIEVSGQKIK	1	P61106	RAB14	59	IEVSGQkIKLQIW
6	FVTPLKEALEAYRR	1	Q9NRF9	POLE3	86	RFVTPLkEALEAY
9	AGVAPLQVKVQGPK	2	P21333	FLNA	1486	VAPLQVkVQGPKG
13	ANLPQSFQVDTSKAGVAPLQVK	2	P21333	FLNA	1477	FQVDTSkAGVAPL
19	ATCAPQHGAPGPGPADASKVVAK	1	P21333	FLNA	2559	GPADASkVVAKGL
14	AYGPGIEPTGNMVKK	1	P21333	FLNA	299	PTGNMVkKRAEFT
12	DAPQDFHPDRVKAR	1	P21333	FLNA	676	FHPDRVkARGPGL
14	FADQHVPGSPFSVKVTGEGR	1	P21333	FLNA	2133	GSPFSVkVTGEGR
12	FNGTHIPGSPFKIR	1	P21333	FLNA	2417	IPGSPFkIRVGEP
2	GKLDVQFSGLTK	1	P21333	FLNA	906	KAAGKGkLDVQFS
6	GLGLSKAYVGQK	1	P21333	FLNA	2569	KGLGLSkAYVGQK
1	KGEITGEVR	6	P21333	FLNA	1801	IPFTIKkGEITGE
1	KIQQNTFTR	1	P21333	FLNA	43	EDAPWKkIQQNTF
1	KNGQHVASSPIPVVISQSEIGDASR	1	P21333	FLNA	2025	HLVHVKkNGQHVA
1	KTHIQDNHDGTYTVAYVPDVTGR	1	P21333	FLNA	1593	PEGKPKkTHIQDN
2	IKVSGLGEK	1	P21333	FLNA	975	LDLSKIkVSGLGE
11	LIALLEVLSQKK	1	P21333	FLNA	87	LEVLSQkKMHRKH
12	IVGPSGAAVPCKVEPGLGADNSVVR	2	P21333	FLNA	1019	GAAVPCkVEPGLG
5	MPSGKVAQPTITDNKDGTVTVR	2	P21333	FLNA	1814	VRMPSGkVAQPTI
6	SPFEVKVGTECGNQK	1	P21333	FLNA	569	RSPFEVkVGTECG
15	SPFSVAVSPSLDLSKIK	1	P21333	FLNA	973	PSLDLSkIKVSGL
7	TGVAVNKPAEFTVDAK	1	P21333	FLNA	691	TGVAVNkPAEFTV
16	TGVAVNKPAEFTVDAKHGGK	1	P21333	FLNA	700	EFTVDAkHGGKAP
7	TGVELGKPTHFTVNAK	1	P21333	FLNA	891	TGVELGkPTHFTV
9	TPCEEILVKHVGSR	1	P21333	FLNA	2607	CEEILVkHVGSRL
10	VAQPTITDNKDGTVTVR	1	P21333	FLNA	1824	PTITDNkDGTVTV
4	VASKIVGPSGAAVPCKVEPGLGADNSVVR	1	P21333	FLNA	1007	QGKVASkIVGPSG
12	VDVGKDQEFTVKSK	1	P21333	FLNA	994	DQEFTVkSKGAGG
9	VGTECGNQKVR	1	P21333	FLNA	578	TECGNQkVRAWGP
2	VKAEGPGLSR	1	P21333	FLNA	876	HDASKVkAEGPGL
2	VKAFGPGLQGGSAGSPAR	1	P21333	FLNA	1071	TKPSKVkAFGPGL
2	VKCSGPGLER	3	P21333	FLNA	1164	FDASKVkCSGPGL
2	VKCSGPGLSPGMVR	2	P21333	FLNA	1452	TDASKVkCSGPGL
2	VKESITR	1	P21333	FLNA	2141	TGEGRVkESITRR
2	VKETADFK	4	P21333	FLNA	498	PKGVRVkETADFK
2	VKVEPSHDASK	1	P21333	FLNA	865	TSPIRVkVEPSHD
2	VKVLPTHDASK	1	P21333	FLNA	1538	RSPFKVkVLPTHD
5	VQGPKGLVEPVDVVDNADGTQTVNYVPSR	1	P21333	FLNA	1491	VKVQGPkGLVEPV
7	VSGLGEKVDVGKDQEFTVK	1	P21333	FLNA	982	VSGLGEkVDVGKD
8	VYGPGVAKTGLK	1	P21333	FLNA	781	YGPGVAkTGLKAH
4	VYTKGAGSGELK	1	P21333	FLNA	508	DFKVYTkGAGSGE
16	ASGNYATVISHNPETKK	1	P62917	RPL8	144	SHNPETkKTRVKL
4	GIVKDIIHDPGR	2	P62917	RPL8	46	YIKGIVkDIIHDP
1	KGAGSVFR	1	P62917	RPL8	10	VIRGQRkGAGSVF
1	KVGLIAAR	1	P62917	RPL8	234	DAPAGRkVGLIAA
3	IDKPILK	1	P62917	RPL8	177	GGGRIDkPILKAG
7	IDKPILKAGR	1	P62917	RPL8	181	IDKPILkAGRAYH
1	KIFEYETQR	3	P50402	EMD	37	RRLYEKkIFEYET
9	ADGYVLEGKELEFYLR	3	P62241	RPS8	193	GYVLEGkELEFYL
1	KYELGRPAANTK	1	P62241	RPS8	26	PYHKKRkYELGRP
13	ISSLLEEQFQQGKLLACIASRPGQCGR	2	P62241	RPS8	170	EQFQQGkLLACIA
11	LTPEEEEILNKKR	1	P62241	RPS8	139	EEEILNkKRSKKI
3	NAKISSLLEEQFQQGK	2	P62241	RPS8	157	ERKKNAkISSLLE
3	LPKNEPQNATGAPGR	1	P51148	RAB5C	184	IAKKLPkNEPQNA
4	NWVKELQR	1	P51148	RAB5C	117	RAKNWVkELQRQA
14	TAMNVNEIFMAIAKK	3	P51148	RAB5C	180	IFMAIAkKLPKNE
11	LCAAAASILGKPADR	1	P30046	DDT	33	AASILGkPADRVN
8	AGHPPAVKAGGMR	3	P51397	DAP	20	GHPPAVkAGGMRI
4	LETKAGHPPAVK	2	P51397	DAP	12	EGKLETkAGHPPA
17	ALDVIQAGKEYVEHTVKER	1	O75937	DNAJC8	135	YVEHTVkERKKQL
5	EREAKEMHER	1	O75937	DNAJC8	183	RKEREAkEMHERK
8	LFAELEIKR	1	O75937	DNAJC8	176	FAELEIkRKEREA
1	KEPEKPIDREK	1	O00422	SAP18	14	TQEEIKkEPEKPI
1	KGTDDSMTLQSQK	2	O00422	SAP18	114	STMSGRkGTDDSM
2	VKEIGSTMSGR	3	O00422	SAP18	104	RPGYRVkEIGSTM
5	KVPEKPETR	1	Q15020	SART3	886	QRKVPEkPETRKA
2	DKAKEEELR	1	O75525	KHDRBS3	106	KGSMRDkAKEEEL
8	GTADETSKSGK	1	Q96CW1	AP2M1	235	TADETSkSGKQSI
3	QGKGTADETSK	1	Q96CW1	AP2M1	227	VIEKQGkGTADET
3	YLKVFEPK	1	Q96CW1	AP2M1	405	LKVRYLkVFEPKL
9	TRAEQSHEKQPLGDPER	1	Q9H9R9	DBNDD1	133	AEQSHEkQPLGDP
3	SLKPDSVR	1	O43488	AKR7A2	115	WDGKSLkPDSVRS
8	SQLETSLKR	1	O43488	AKR7A2	128	QLETSLkRLQCPQ
2	MKYQECNK	1	E7EU14	NA	43	DKDAKMkYQECNK
5	SFVDKVGESNNMV	1	Q9Y3E0	GOLT1B	130	IRSFVDkVGESNN
3	FCKNAEEFTK	1	A0A1B0GUS4	UBE2L5	138	DRKKFCkNAEEFT
2	TKIYHPNIDEK	1	A0A1B0GUS4	UBE2L5	73	RITFKTkIYHPNI
2	SKDIFDQLAK	1	P25205	MCM3	293	FSKTRSkDIFDQL
2	SKEINQTR	1	Q92878	RAD50	585	WLHSKSkEINQTR
5	NLQVKCAQIEAK	1	P55209	NAP1L1	87	LKNLQVkCAQIEA
11	YAVLYQPLFDKR	4	P55209	NAP1L1	116	YQPLFDkRFEIIN
2	FKTSVGSAK	1	Q9Y6Q5	AP1M2	326	ADSPRFkTSVGSA
1	KQSVANGVEISVPVPSDADSPR	1	Q9Y6Q5	AP1M2	303	AKGQFKkQSVANG
12	ILQEYITQQSNKLETGK	1	Q9Y6Q5	AP1M2	141	ITQQSNkLETGKS
10	IIGVDINKDKFAR	2	P11766	ADH5	228	VDINKDkFARAKE
5	VTQGKGLMPDGTSR	3	P11766	ADH5	120	IRVTQGkGLMPDG
6	DPQFQKLQQWYR	7	P06744	GPI	12	RDPQFQkLQQWYR
7	ELQAAGKSPEDLER	3	P06744	GPI	454	ELQAAGkSPEDLE
15	FAAYFQQGDMESNGKYITK	2	P06744	GPI	362	DMESNGkYITKSG
1	KELQAAGKSPEDLER	2	P06744	GPI	447	STEEARkELQAAG
6	MFNGEKINYTEGR	2	P06744	GPI	89	RMFNGEkINYTEG
7	MLVDLAKSR	1	P06744	GPI	73	MLVDLAkSRGVEA
5	SGDWKGYTGK	1	P06744	GPI	142	VRSGDWkGYTGKT
10	SNTPILVDGKDVMPEVNK	2	P06744	GPI	116	PILVDGkDVMPEV
4	YITKSGTR	1	P06744	GPI	366	NGKYITkSGTRVD
6	ALRDAKLDK	1	P17066	HSPA6	327	KALRDAkLDKAQI
4	AMTKDNNLLGR	1	P17066	HSPA6	453	GERAMTkDNNLLG
3	ANKITITNDKGR	1	P17066	HSPA6	502	STGKANkITITND
9	LLQDFFNGKELNK	2	P17066	HSPA6	359	QDFFNGkELNKSI
3	IPKVQK	1	P17066	HSPA6	347	GSTRIPkVQKLLQ
7	ITITNDKGR	2	P17066	HSPA6	509	ITITNDkGRLSKE
8	STLEPVEKALR	1	P17066	HSPA6	321	TLEPVEkALRDAK
10	AIEENNNFSKMAEEK	1	P16949	STMN1	95	ENNNFSkMAEEKL
2	DKHIEEVR	2	P16949	STMN1	128	RLREKDkHIEEVR
10	DLSLEEIQKKLEAAEER	2	P16949	STMN1	53	LEEIQKkLEAAEE
7	EAQMAAKLER	5	P16949	STMN1	119	EAQMAAkLERLRE
4	EHEKEVLQK	2	P16949	STMN1	80	EKREHEkEVLQKA
2	EKDKHIEEVR	2	P16949	STMN1	126	LERLREkDKHIEE
2	KKDLSLEEIQK	1	P16949	STMN1	43	LSPPKKkDLSLEE
1	KSHEAEVLK	1	P16949	STMN1	62	AAEERRkSHEAEV
4	LTHKMEANKENR	3	P16949	STMN1	104	EEKLTHkMEANKE
5	MAEEKLTHK	3	P16949	STMN1	100	SKMAEEkLTHKME
9	MASSDIQVKELEK	6	P16949	STMN1	9	SSDIQVkELEKRA
5	MEANKENR	1	P16949	STMN1	109	HKMEANkENREAQ
2	NKESKDPADETEAD	1	P16949	STMN1	137	EEVRKNkESKDPA
8	SHEAEVLKQLAEKR	2	P16949	STMN1	70	HEAEVLkQLAEKR
2	SKESVPEFPLSPPK	2	P16949	STMN1	29	ILSPRSkESVPEF
4	IMLKGDNITLLQSVSN	2	P62304	SNRPE	80	LGRIMLkGDNITL
3	VQKVMVQPINLIFR	2	P62304	SNRPE	12	QGQKVQkVMVQPI
4	FVEKCSPIGVYTSGK	2	P33992	MCM5	396	LLKFVEkCSPIGV
7	IVEGILKRPPDEQR	1	Q15370	ELOB	36	IVEGILkRPPDEQ
2	NKYGDAFIR	1	P62312	LSM6	59	NGQLKNkYGDAFI
1	KGSLLVAR	1	Q15904	ATP6AP1	380	VSSLSKkGSLLVA
2	VKTSSQPGFLER	1	Q9BTV4	TMEM43	18	REHVKVkTSSQPG
1	KGEVVDR	1	Q13618	CUL3	174	MIARERkGEVVDR
1	KLEGNSPQGSNQGVK	1	P61006	RAB8A	176	KAKMDKkLEGNSP
7	ITPDQQKR	1	P61006	RAB8A	197	ITPDQQkRSSFFR
6	CAYVYKAK	1	P18077	RPL35A	52	RCAYVYkAKNNTV
7	EHTALLKIEGVYAR	3	P18077	RPL35A	29	EHTALLkIEGVYA
9	NNTVTPGGKPNK	1	P18077	RPL35A	63	TVTPGGkPNKTRV
19	ELAKVEEEIQTLSQVLAAKEK	1	P55327	TPD52	100	SQVLAAkEKHLAE
1	KLEDVKNSPTFK	5	P55327	TPD52	164	GSVITKkLEDVKN
6	KLEDVKNSPTFK	1	P55327	TPD52	169	KKLEDVkNSPTFK
1	KLGINSLQELK	2	P55327	TPD52	110	LAEIKRkLGINSL
11	KLGINSLQELKQNIAK	2	P55327	TPD52	120	NSLQELkQNIAKG
1	KTSETLSQAGQK	4	P55327	TPD52	138	ATSAYKkTSETLS
5	SFEEKVENLKSK	1	P55327	TPD52	180	FKSFEEkVENLKS
10	SFEEKVENLKSK	1	P55327	TPD52	185	EKVENLkSKVGGT
11	TSETLSQAGQKASAAFSSVGSVITK	3	P55327	TPD52	149	LSQAGQkASAAFS
1	KFGDMSYSIR	1	Q16890	TPD52L1	124	GTAISKkFGDMSY
1	KTHETLSHAGQK	2	Q16890	TPD52L1	98	TTTAYKkTHETLS
12	KTHETLSHAGQKATAAFSNVGTAISK	1	Q16890	TPD52L1	109	LSHAGQkATAAFS
10	LGMNLMNELKQNFSK	2	Q16890	TPD52L1	80	NLMNELkQNFSKS
6	QVLSAKER	1	Q16890	TPD52L1	60	RQVLSAkERHLVE
12	SWHDMQTTTAYK	2	Q16890	TPD52L1	97	QTTTAYkKTHETL
9	VETTVTSLKTK	1	Q16890	TPD52L1	162	TTVTSLkTKVGGT
3	DIKDTTVGTLSQR	2	P51665	PSMD7	180	HLLRDIkDTTVGT
3	LHKNDIAINELMK	1	P51665	PSMD7	103	TGPKLHkNDIAIN
8	MPELAVQKVVVHPLVLLSVVDHFNR	1	P51665	PSMD7	8	PELAVQkVVVHPL
5	ATVPKTEIREK	1	P62847	RPS24	37	GKATVPkTEIREK
1	KQMVIDVLHPGK	4	P62847	RPS24	21	NRLLQRkQMVIDV
11	QMVIDVLHPGKATVPK	1	P62847	RPS24	32	DVLHPGkATVPKT
7	THFGGGKTTGFGMIYDSLDYAK	3	P62847	RPS24	68	THFGGGkTTGFGM
15	TTGFGMIYDSLDYAK	1	P62847	RPS24	83	DSLDYAkKNEPKH
3	LGKVADWTGATYQDKR	1	O15371	EIF3D	41	KGDRLGkVADWTG
2	QKLDSQR	1	O15371	EIF3D	412	GVDWRQkLDSQRG
2	QKWDQK	1	O15371	EIF3D	149	QFGVRQkWDQKSQ
3	TQKTAYQR	1	O15371	EIF3D	90	DTARTQkTAYQRN
12	VADWTGATYQDKR	1	O15371	EIF3D	53	GATYQDkRYTNKY
4	LADKLYNLR	1	Q8N4P3	HDDC3	123	LVKLADkLYNLRD
2	RKDPEGTPYINHPIGVAR	1	Q8N4P3	HDDC3	25	HRQQRRkDPEGTP
5	LAVLKYYKVDENGK	1	P62979	RPS27A	104	VKLAVLkYYKVDE
6	LIFAGKQLEDGR	2	P62979	RPS27A	48	RLIFAGkQLEDGR
6	VDENGKISR	1	P62979	RPS27A	113	KVDENGkISRLRR
3	YYKVDENGK	3	P62979	RPS27A	107	AVLKYYkVDENGK
15	AAAAAAALQAKSDEK	2	P36578	RPL4	368	QAKSDEkAAVAGK
7	EAVLLLKK	1	P36578	RPL4	172	EAVLLLkKLKAWN
1	KLDELYGTWRK	1	P36578	RPL4	259	TESAFRkLDELYG
1	KPTTEEKKPAA	1	P36578	RPL4	417	KKPAEKkPTTEEK
2	LKAWNDIK	1	P36578	RPL4	175	LLLKKLkAWNDIK
3	ILKSPEIQR	2	P36578	RPL4	294	DLSRILkSPEIQR
6	LNPYAKTMR	1	P36578	RPL4	333	KLNPYAkTMRRNT
14	MACARPLISVYSEKGESSGK	3	P36578	RPL4	14	ISVYSEkGESSGK
9	SNYNLPMHKMINTDLSR	1	P36578	RPL4	283	YNLPMHkMINTDL
2	TKEAVLLLK	1	P36578	RPL4	165	EGYKKTkEAVLLL
3	VDKAAAAAAALQAK	4	P36578	RPL4	353	HKLRVDkAAAAAA
3	DNKQAGVFEPTIVK	1	P17987	TCP1	499	GKPRDNkQAGVFE
4	LACKEAVR	1	P17987	TCP1	126	GYRLACkEAVRYI
3	NLKWIGLDLSNGKPR	1	P17987	TCP1	484	PERKNLkWIGLDL
23	SLLVIPNTLAVNAAQDSTDLVAKLR	1	P17987	TCP1	466	STDLVAkLRAFHN
2	LKASCQESAR	1	Q9Y6K9	IKBKG	344	REYSKLkASCQES
4	QFVKDSIR	2	P60059	SEC61G	16	PSRQFVkDSIRLV
8	MAASLVGKK	1	Q9BY32	ITPA	8	AASLVGkKIVFVT
4	SDAKAVQNSSR	1	Q86UE4	MTDH	174	KSKSDAkAVQNSS
3	DGKYSQVLANGLDNK	1	P62269	RPS18	94	KDVKDGkYSQVLA
1	KADIDLTK	3	P62269	RPS18	47	AHVVLRkADIDLT
8	KADIDLTKR	1	P62269	RPS18	54	ADIDLTkRAGELT
1	KIAFAITAIK	1	P62269	RPS18	25	NIDGRRkIAFAIT
8	MSLVIPEKFQHILR	10	P62269	RPS18	8	SLVIPEkFQHILR
3	QYKIPDWFLNR	6	P62269	RPS18	78	QNPRQYkIPDWFL
12	YSQVLANGLDNKLREDLER	2	P62269	RPS18	106	ANGLDNkLREDLE
4	AIQKGNMEVAR	1	Q7LBR1	CHMP1B	42	IKKAIQkGNMEVA
4	FAAKELSR	1	Q7LBR1	CHMP1B	16	NLKFAAkELSRSA
7	AASGEAKPK	1	P16401	H1-5	120	AASGEAkPKAKKA
11	ALAAGGYDVEKNNSR	3	P16401	H1-5	78	GGYDVEkNNSRIK
12	ATGPPVSELITKAVAASK	2	P16401	H1-5	49	VSELITkAVAASK
6	AVAASKER	1	P16401	H1-5	55	KAVAASkERNGLS
1	KALAAGGYDVEK	2	P16401	H1-5	67	SLAALKkALAAGG
1	KATGPPVSELITK	2	P16401	H1-5	37	AGAAKRkATGPPV
17	MSETAPAETATPAPVEKSPAK	1	P16401	H1-5	17	TPAPVEkSPAKKK
9	NGLSLAALKK	1	P16401	H1-5	66	LSLAALkKALAAG
5	SLVSKGTLVQTK	1	P16401	H1-5	93	LKSLVSkGTLVQT
2	AKEPAGENGGR	1	P16435	POR	497	TNWLRAkEPAGEN
4	QQGKEVGETLLYYGCR	1	P16435	POR	555	WLRQQGkEVGETL
10	CSQAVYAAEKVIGAGK	2	P21291	CSRP1	131	AVYAAEkVIGAGK
4	FAQKIGGSER	2	P21291	CSRP1	112	ASKFAQkIGGSER
10	GLESTTLADKDGEIYCK	1	P21291	CSRP1	161	STTLADkDGEIYC
5	NFGPKGFGFGQGAGALVHSE	2	P21291	CSRP1	178	AKNFGPkGFGFGQ
1	KGDECELLGHSK	1	P49411	TUFM	286	ERGILKkGDECEL
1	KYEEIDNAPEER	1	P49411	TUFM	91	GGAKFKkYEEIDN
9	ILAEGGGAKFK	2	P49411	TUFM	88	AEGGGAkFKKYEE
9	TTLTAAITKILAEGGGAK	1	P49411	TUFM	79	LTAAITkILAEGG
11	TVVTGIEMFHKSLER	2	P49411	TUFM	311	GIEMFHkSLERAE
1	KFGKHGGTIPIVPTAEFQDR	1	P00367	GLUD1	477	QESLERkFGKHGG
4	KFGKHGGTIPIVPTAEFQDR	1	P00367	GLUD1	480	LERKFGkHGGTIP
5	KDPVKIVR	1	Q9ULC4	MCTS1	51	PKKDPVkIVRCHE
5	KFDEKENVSNCIQLK	1	Q9ULC4	MCTS1	8	FKKFDEkENVSNC
6	IHEDTKEINEK	1	Q9NTJ3	SMC4	349	KIHEDTkEINEKS
16	LFVGNLPTDITEEDFKR	1	Q8WXF1	PSPC1	99	ITEEDFkRLFERY
12	AFSGYLGTDQSKWK	1	P10768	ESD	198	LGTDQSkWKAYDA
1	KAFSGYLGTDQSK	1	P10768	ESD	186	LCPWGKkAFSGYL
6	QISSNKCFGGLQKVFEHDSVELNCK	3	P10768	ESD	10	KQISSNkCFGGLQ
13	QISSNKCFGGLQKVFEHDSVELNCK	3	P10768	ESD	17	CFGGLQkVFEHDS
2	WKAYDATHLVK	1	P10768	ESD	200	TDQSKWkAYDATH
6	ATPEEKLKLEDFFAR	5	P11413	G6PD	95	KATPEEkLKLEDF
8	ATPEEKLKLEDFFAR	1	P11413	G6PD	97	TPEEKLkLEDFFA
10	GPTEADELMKR	1	P11413	G6PD	497	EADELMkRVGFQY
1	KPGMFFNPEESELDLTYGNR	10	P11413	G6PD	408	TKMMTKkPGMFFN
25	KPGMFFNPEESELDLTYGNRYKNVK	1	P11413	G6PD	432	NRYKNVkLPDAYE
1	KQSEPFFK	2	P11413	G6PD	82	TVADIRkQSEPFF
8	KQSEPFFKATPEEK	5	P11413	G6PD	89	QSEPFFkATPEEK
16	LFYLALPPTVYEAVTK	1	P11413	G6PD	152	VYEAVTkNIHESC
5	IIVEKPFGR	3	P11413	G6PD	171	NRIIVEkPFGRDL
4	MMTKKPGMFFNPEESELDLTYGNR	1	P11413	G6PD	407	YTKMMTkKPGMFF
10	VGFQYEGTYKWVNPHKL	1	P11413	G6PD	508	QYEGTYkWVNPHK
10	VQPNEAVYTK	3	P11413	G6PD	403	NEAVYTkMMTKKP
6	HGVEAKNYEEIAK	3	P49755	TMED10	133	KHGVEAkNYEEIA
16	LEDLSESIVNDFAYMKK	4	P49755	TMED10	169	NDFAYMkKREEEM
4	SHLKITDSAGHILYSK	6	P49755	TMED10	75	GLRSHLkITDSAG
3	VEKLKPLEVELR	1	P49755	TMED10	143	EIAKVEkLKPLEV
1	KHTLGEVWVQK	1	Q96D46	NMD3	339	AGMISKkHTLGEV
1	KEYDALK	2	Q96AG4	LRRC59	201	EKERRRkEYDALK
5	LDLSKNK	1	Q96AG4	LRRC59	71	VKLDLSkNKLQQL
9	VAGDCLDEKQCK	1	Q96AG4	LRRC59	135	GDCLDEkQCKQCA
12	VAGDCLDEKQCKQCANK	1	Q96AG4	LRRC59	138	LDEKQCkQCANKV
6	VLQHMKAVQADQERER	2	Q96AG4	LRRC59	149	KVLQHMkAVQADQ
2	LKSTLDPQK	1	Q658Y4	FAM91A1	321	PSVNRLkSTLDPQ
4	EQIKGGTGDEKK	1	Q12904	AIMP1	114	GTKEQIkGGTGDE
1	KQQSIAGSADSKPIDVSR	1	Q12904	AIMP1	137	GEKKEKkQQSIAG
9	MANNDAVLKR	1	Q12904	AIMP1	9	NNDAVLkRLEQKG
2	MKQSQDLNR	1	Q9H019	MTFR1L	253	KDFHRMkQSQDLN
1	KIDFLTK	1	Q99471	PFDN5	106	KDFFKRkIDFLTK
5	VVQTKYVEAK	1	Q99471	PFDN5	42	LKVVQTkYVEAKD
5	YVEAKDCLNVLNK	1	Q99471	PFDN5	47	TKYVEAkDCLNVL
1	KFMDQHPEMDFSK	1	Q9Y266	NUDC	315	KQEILKkFMDQHP
1	KINPENSK	1	Q9Y266	NUDC	268	PEINTKkINPENS
8	KINPENSKLSDLDSETR	1	Q9Y266	NUDC	275	INPENSkLSDLDS
2	LKPNLGNGADLPNYR	1	Q9Y266	NUDC	160	KDKGKLkPNLGNG
8	SDLIPTIKFR	1	Q14691	GINS1	63	DLIPTIkFRHCSL
3	AAKEYPFILDAFQR	1	P42285	MTREX	134	RVGKAAkEYPFIL
1	KFDGKDFR	1	P42285	MTREX	503	LFTNARkFDGKDF
1	KVVQQLR	1	P63218	GNG5	12	SVAAMKkVVQQLR
1	KSDTKVDSSPR	1	Q5T0W9	FAM83B	819	ENQKPKkSDTKVD
1	KLGFYEWTSR	1	P06280	GLA	393	LLPVKRkLGFYEW
3	LPKNEPQNPGANSAR	1	P20339	RAB5A	183	IAKKLPkNEPQNP
4	NWVKELQR	1	P20339	RAB5A	116	RAKNWVkELQRQA
1	KLLEGEETR	2	P07196	NEFL	391	EIAAYRkLLEGEE
14	ARDDLITDLLNEAKQR	1	P36543	ATP6V1E1	99	DLLNEAkQRLSKV
2	IKVSNTLESR	1	P36543	ATP6V1E1	191	NGDRKIkVSNTLE
10	MALSDADVQKQIK	2	P36543	ATP6V1E1	10	SDADVQkQIKHMM
2	NKSAYFAEK	1	P09525	ANXA4	246	VKCMRNkSAYFAE
7	SLYSFIKGDTSGDYRK	3	P09525	ANXA4	300	SLYSFIkGDTSGD
3	SMKGLGTDDNTLIR	1	P09525	ANXA4	259	KLYKSMkGLGTDD
12	LISSDGHEFIVKR	1	Q15369	ELOC	32	GHEFIVkREHALT
2	MKGDYYR	2	Q04917	YWHAH	127	VFYLKMkGDYYRY
8	NLLSVAYKNVVGAR	4	Q04917	YWHAH	50	LLSVAYkNVVGAR
12	NSVVEASEAAYKEAFEISK	1	Q04917	YWHAH	155	ASEAAYkEAFEIS
5	VFYLKMK	1	Q04917	YWHAH	125	SKVFYLkMKGDYY
8	VISSIEQKTMADGNEK	1	Q04917	YWHAH	69	ISSIEQkTMADGN
4	TVFKTENSILR	1	Q9NRF8	CTPS2	458	IRRTVFkTENSIL
4	IMLKNVEDFTGPR	6	P61009	SPCS3	49	VSRIMLkNVEDFT
3	NFKTTNER	1	P51398	DAP3	192	TWLKNFkTTNERF
2	DKFSQNIGR	2	Q9NV56	MRGBP	63	MICIRDkFSQNIG
1	KLSPTEPK	2	O14828	SCAMP3	74	SLQPSRkLSPTEP
7	TGASFQKAQQEFAAGVFSNPAVR	1	O14828	SCAMP3	313	TGASFQkAQQEFA
2	EKLPSYGMQK	1	Q9H2U1	DHX36	206	MQHFREkLPSYGM
2	TKQTMHGILER	1	Q9NQ88	TIGAR	63	SDLMRTkQTMHGI
7	AGGDETKLLVVDRETDEFFK	1	O14745	SLC9A3R1	227	AGGDETkLLVVDR
19	AGLLAGDRLVEVNGENVEKETHQQVVSR	1	O14745	SLC9A3R1	69	NGENVEkETHQQV
30	AQEAPGQAEPPAAAEVQGAGNENEPREADKSHPEQR	1	O14745	SLC9A3R1	142	EPREADkSHPEQR
1	KNELFSNL	1	O14745	SLC9A3R1	351	QMDWSKkNELFSN
6	LCCLEKGPNGYGFHLHGEK	2	O14745	SLC9A3R1	19	RLCCLEkGPNGYG
12	IVEVNGVCMEGKQHGDVVSAIR	3	O14745	SLC9A3R1	210	GVCMEGkQHGDVV
1	KVFANPEDCVAFGKGENAK	4	P10620	MGST1	42	FYRLTRkVFANPE
14	KVFANPEDCVAFGKGENAK	2	P10620	MGST1	55	DCVAFGkGENAKK
4	IHEKQNGHIK	1	P0C7V7	SEC11B	91	VLKIHEkQNGHIK
1	KEAYVHK	1	P61326	MAGOH	48	NDVMIRkEAYVHK
7	SVMEELKR	1	P61326	MAGOH	61	SVMEELkRIIDDS
8	YANNSNYKNDVMIR	1	P61326	MAGOH	41	ANNSNYkNDVMIR
5	VQDIKEVKQNIHLIR	1	Q9UHA3	RSL24D1	125	QKVQDIkEVKQNI
4	AAEKLYLADPMK	2	P49458	SRP9	16	FSRAAEkLYLADP
5	LMVAKEAR	1	P49458	SRP9	76	MRLMVAkEARNVT
8	LYLADPMKAR	1	P49458	SRP9	24	YLADPMkARVVLK
5	ASTSKSESSQK	1	P62753	RPS6	243	LRASTSkSESSQK
4	KGEKDIPGLTDTTVPR	2	P62753	RPS6	119	IVKKGEkDIPGLT
1	KGEKDIPGLTDTTVPR	2	P62753	RPS6	116	NLVIVKkGEKDIP
1	KLFNLSK	4	P62753	RPS6	143	RASRIRkLFNLSK
7	KLFNLSKEDDVR	1	P62753	RPS6	149	KLFNLSkEDDVRQ
12	LNISFPATGCQKLIEVDDER	1	P62753	RPS6	14	PATGCQkLIEVDD
15	MATEVAADALGEEWKGYVVR	3	P62753	RPS6	46	ALGEEWkGYVVRI
2	NKEEAAEYAK	1	P62753	RPS6	203	QRTKKNkEEAAEY
10	NKEEAAEYAKLLAK	3	P62753	RPS6	211	EAAEYAkLLAKRM
2	AKGSETPGATPGSK	1	O75533	SF3B1	240	ETPGRAkGSETPG
15	GGDSIGETPTPGASKR	1	O75533	SF3B1	333	PTPGASkRKSRWD
1	KFMDKK	1	P62308	SNRPG	11	HPPELKkFMDKKL
1	KQAIQELR	1	Q96DV4	MRPL38	107	QQLLERkQAIQEL
9	RLEVLDSTKSSR	1	P0C7P4	UQCRFS1P1	110	EVLDSTkSSREST
3	GNKYSAQGER	1	O43324	EEF1E1	21	GLSKGNkYSAQGE
4	QANKEYLLGSTAEEK	1	O43324	EEF1E1	57	LVKQANkEYLLGS
13	HGDPGDAAQQEAKHR	3	O14737	PDCD5	33	AAQQEAkHREAEM
7	LAELQAKHGDPGDAAQQEAK	3	O14737	PDCD5	20	LAELQAkHGDPGD
8	LSNLALVKPEK	2	O14737	PDCD5	63	SNLALVkPEKTKA
11	VSEQGLIEILKK	1	O14737	PDCD5	97	GLIEILkKVSQQT
7	VSQQTEKTTTVK	2	O14737	PDCD5	105	VSQQTEkTTTVKF
1	KDIESIR	1	Q6PI48	DARS2	382	AKYLKRkDIESIR
3	AAKLAPEFAK	3	P30041	PRDX6	56	ELGRAAkLAPEFA
5	GVFTKELPSGK	2	P30041	PRDX6	209	PKGVFTkELPSGK
7	LAPEFAKR	1	P30041	PRDX6	63	LAPEFAkRNVKLI
9	VVFVFGPDKK	1	P30041	PRDX6	141	FVFGPDkKLKLSI
4	HGEKVEECQR	1	Q15149	PLEC	1401	IERHGEkVEECQR
1	KGLLSAEVAR	1	Q15149	PLEC	3849	IYQALKkGLLSAE
1	KQEELQQLEQQRR	1	Q15149	PLEC	2706	EEGVRRkQEELQQ
1	KYSCDR	1	Q15149	PLEC	885	QEALRRkYSCDRS
2	IKELQNAGDR	1	Q15149	PLEC	810	LKEKKIkELQNAG
2	LKQSAEEQAQAR	1	Q15149	PLEC	2255	EEAERLkQSAEEQ
2	QKAQVEQELTTLR	1	Q15149	PLEC	2318	EQTLRQkAQVEQE
10	QLAEAHAQAKAQAER	1	Q15149	PLEC	1520	EAHAQAkAQAERE
5	VLAEKLAAIGEATR	3	Q15149	PLEC	1975	ERVLAEkLAAIGE
5	NIFLKDQNIFVQK	2	P53004	BLVRA	253	NKNIFLkDQNIFV
2	LKEAGTVGR	1	Q9HA64	FN3KRP	123	LGEMRLkEAGTVG
4	VNPKAEAR	1	Q9HA64	FN3KRP	45	FVKVNPkAEARRM
2	VKSPEPR	1	Q8WZ42	TTN	-31942	TSPPRVkSPEPRV
1	KEYIER	1	Q9P2P5	HECW2	1403	VTEKNKkEYIERM
2	LKNGELENIKPK	2	P68402	PAFAH1B2	86	HVLWRLkNGELEN
1	KLELSENR	3	Q92688	ANP32B	68	KLPKLKkLELSEN
11	IFGGLDMLAEKLPNLTHLNLSGNK	1	Q92688	ANP32B	86	LDMLAEkLPNLTH
2	LKDISTLEPLKK	2	Q92688	ANP32B	101	LSGNKLkDISTLE
2	LKKLELSENR	2	Q92688	ANP32B	67	PKLPKLkKLELSE
5	ADAGKEGNNPAENGDAK	2	P05204	HMGN2	64	GKADAGkEGNNPA
6	TDQAQKAEGAGDAK	1	P05204	HMGN2	82	KTDQAQkAEGAGD
12	EDPNLVPSISNKR	3	P10606	COX5B	86	VPSISNkRIVGCI
1	KGLDPYNVLAPK	5	P10606	COX5B	57	IMLAAKkGLDPYN
3	DSKSQAPGQPGASQWGSR	2	Q96EP5	DAZAP1	194	AEPRDSkSQAPGQ
5	NIDPKPCTPR	2	Q96EP5	DAZAP1	83	GRNIDPkPCTPRG
8	SLDNFFAKR	1	Q9UKY7	CDV3	15	LDNFFAkRDKKKK
1	KLVEALCAAGHR	1	P23919	DTYMK	25	KSTQSRkLVEALC
5	TATEKPLGELWK	1	P23919	DTYMK	205	IRTATEkPLGELW
1	KVLEFER	2	Q96BP3	PPWD1	65	TLAKKRkVLEFER
4	AYDKAVASFK	1	Q16637	SMN1	45	LIKAYDkAVASFK
11	ELAPLQELIEKLGSKDR	1	Q9H8S9	MOB1A	210	LQELIEkLGSKDR
1	KNIPEGSHQYELLK	1	Q9H8S9	MOB1A	17	KTFKPKkNIPEGS
13	FNADEFEDMVAEKR	2	P27635	RPL10	188	EDMVAEkRLIPDG
6	GVPDAKIR	1	P27635	RPL10	30	RGVPDAkIRIFDL
3	INKMLSCAGADR	2	P27635	RPL10	101	HVIRINkMLSCAG
4	SCGKDGFHIR	1	P27635	RPL10	82	MVKSCGkDGFHIR
1	KEYEEDGAR	2	P61163	ACTR1A	361	KMWVSKkEYEEDG
10	VLIGEGVLTKLCR	1	Q9H8W4	PLEKHF2	44	GEGVLTkLCRKKP
6	FSAYIKNSRPEANEALER	2	Q9Y696	CLIC4	130	KFSAYIkNSRPEA
6	NFDIPKEMTGIWR	3	Q9Y696	CLIC4	212	RNFDIPkEMTGIW
2	AKELLGQGLLLR	3	B5ME19	EIF3CL	644	QSSGRAkELLGQG
2	AKSIVDKEGVPR	1	B5ME19	EIF3CL	94	KAYGKAkSIVDKE
1	KLNEILQAR	1	B5ME19	EIF3CL	333	HAVVIKkLNEILQ
1	KNEGYMR	2	B5ME19	EIF3CL	895	QKDGYRkNEGYMR
8	HAVSEGTKAVTK	2	P33778	H2BC3	117	AVSEGTkAVTKYT
1	KESYSIYVYK	2	P33778	H2BC3	35	KRKRSRkESYSIY
6	LAHYNKR	1	P33778	H2BC3	86	RLAHYNkRSTITS
9	LLLPGELAKHAVSEGTK	6	P33778	H2BC3	109	LPGELAkHAVSEG
11	QVHPDTGISSKAMGIMNSFVNDIFER	1	P33778	H2BC3	58	DTGISSkAMGIMN
3	VLKQVHPDTGISSK	1	P33778	H2BC3	47	YVYKVLkQVHPDT
9	MAETEALSK	1	Q9BUP3	HTATIP2	9	ETEALSkLREDFR
1	KDFIFVSAR	1	O15357	INPPL1	391	KDRTQRkDFIFVS
9	LGVVFEKEKDR	1	O15357	INPPL1	385	VVFEKEkDRTQRK
2	LKPQYLEELPGQLK	1	P21266	GSTM3	128	SDHEKLkPQYLEE
2	NKITQSNAILR	2	P21266	GSTM3	73	LLDGKNkITQSNA
19	AIGSASEGAQSSLQEVYHK	1	P28066	PSMA5	187	LQEVYHkSMTLKE
4	EAIKSSLIILK	3	P28066	PSMA5	196	TLKEAIkSSLIIL
8	EMDDFLQKLR	2	O15305	PMM2	34	MDDFLQkLRQKIK
1	KIQNDAGVR	3	Q96I24	FUBP3	278	NGEMIKkIQNDAG
7	ITGDAFKVQQAR	2	Q96I24	FUBP3	220	ITGDAFkVQQARE
6	NGEMIKKIQNDAGVR	1	Q96I24	FUBP3	277	RNGEMIkKIQNDA
2	DKVVALAEGR	1	Q8N6T3	ARFGAP1	114	AALFRDkVVALAE
5	EGATKFGSQASQK	1	Q8N6T3	ARFGAP1	231	AKEGATkFGSQAS
6	FASAAKEGATK	1	Q8N6T3	ARFGAP1	226	RFASAAkEGATKF
1	KSPSSDSWTCADTSTER	1	Q8N6T3	ARFGAP1	342	EPTKTRkSPSSDS
8	AAVAGLDKAER	1	P22102	GART	852	AVAGLDkAERAGI
2	IKDTVLQR	1	P22102	GART	251	DLLLKIkDTVLQR
14	IKDLSTVEALQNLKNLK	1	Q9BTT0	ANP32E	113	EALQNLkNLKSLD
2	AKLQIELGK	1	P20700	LMNB1	102	TARERAkLQIELG
1	KIGDTSVSYK	2	P20700	LMNB1	474	GWEMIRkIGDTSV
1	KLLEGEEER	1	P20700	LMNB1	379	EISAYRkLLEGEE
7	LAVYIDKVR	1	P20700	LMNB1	49	LAVYIDkVRSLET
2	LKNTSEQDQPMGGWEMIR	1	P20700	LMNB1	457	GKFIRLkNTSEQD
3	LYKEELEQTYHAK	2	P20700	LMNB1	261	AQVRLYkEELEQT
13	LYKEELEQTYHAKLENAR	1	P20700	LMNB1	271	EQTYHAkLENARL
4	VILKNSQGEEVAQR	1	P20700	LMNB1	532	DVKVILkNSQGEE
1	KFGVVLDEIKPSSAPELQAVR	2	O14579	COPE	65	AYLAQRkFGVVLD
6	SHPFIKEYQAK	1	O14579	COPE	288	RSHPFIkEYQAKE
4	FLHKHDLDLICR	1	P62136	PPP1CA	238	VAKFLHkHDLDLI
2	IKYPENFFLLR	1	P62136	PPP1CA	113	LLAYKIkYPENFF
4	FGTKGLAITFVSDENDAK	2	O00148	DDX39A	383	AGRFGTkGLAITF
5	YQQFKDFQR	1	O00148	DDX39A	333	SRYQQFkDFQRRI
13	VQNMALYADVGGKQFPVTR	5	P51571	SSR4	73	YADVGGkQFPVTR
2	AKQAATMSEVEWR	1	Q9UHB9	SRP68	288	ITQTRAkQAATMS
2	AKKEAPPMEKPEVVK	1	P62841	RPS15	64	KRLRKAkKEAPPM
3	AKKEAPPMEKPEVVK	1	P62841	RPS15	65	RLRKAKkEAPPME
7	EAPPMEKPEVVK	3	P62841	RPS15	72	EAPPMEkPEVVKT
1	KQHSLLK	2	P62841	RPS15	52	NRGLRRkQHSLLK
7	MAEVEQKK	1	P62841	RPS15	7	MAEVEQkKKRTFR
1	KAADKLIQNLDANHDGR	1	Q96FQ6	S100A16	57	SDTGNRkAADKLI
12	ALQQYTLEPSEKPFDLK	2	Q9Y678	COPG1	572	TLEPSEkPFDLKS
10	VNHVTLSQPKIVK	1	P61769	B2M	111	VTLSQPkIVKWDR
9	VPIILVGNKSDLR	1	Q8IXI1	RHOT2	119	IILVGNkSDLRSG
12	ELEQYGQCVAAKPESWQR	1	Q9BSY4	CHCHD5	26	GQCVAAkPESWQR
1	KLQDVFEMR	1	Q15059	BRD3	403	VVAMARkLQDVFE
7	GGSSGAKFR	1	P62829	RPL23	13	GGSSGAkFRISLG
2	KKVHPAVVIR	1	P62829	RPL23	75	KPELRKkVHPAVV
15	LPAAGVGDMVMATVKK	2	P62829	RPL23	66	MVMATVkKGKPEL
20	ISLGLPVGAVINCADNTGAKNLYIISVK	1	P62829	RPL23	35	ADNTGAkNLYIIS
2	EKLQGQDSER	1	Q9UKS6	PACSIN3	101	HLEVREkLQGQDS
1	KAENPSPR	1	Q9NZJ0	DTL	671	AMAAKRkAENPSP
4	DHQKLER	1	Q9UQM7	CAMK2A	56	SARDHQkLEREAR
2	DKIIVNDR	1	Q9Y3I0	RTCB	285	KAMKRDkIIVNDR
1	KIEKEIQQK	1	Q9P2J5	LARS1	15	KVDFLKkIEKEIQ
14	AIYDTPCIQAESEKWQQALK	2	O00232	PSMD12	262	IQAESEkWQQALK
1	KGSLESPATDVFGSTEEGEKR	1	O00232	PSMD12	330	YGMELRkGSLESP
4	DIAKLVPK	1	P61024	CKS1B	30	LPKDIAkLVPKTH
5	SLQVKSSPVVNDGVVR	2	Q12849	GRSF1	242	MKSLQVkSSPVVN
2	EKIEDAKESQR	1	P49321	NASP	652	LPEIREkIEDAKE
1	KPTDGASSSNCVTDISHLVR	1	P49321	NASP	698	SMIASRkPTDGAS
11	FNVWDVGGQDKIRPLWR	1	P62330	ARF6	69	DVGGQDkIRPLWR
6	TTILYKLK	1	P62330	ARF6	32	KTTILYkLKLGQS
4	AAGKLKAEGSEIR	3	P07237	P4HB	69	YAKAAGkLKAEGS
6	AAGKLKAEGSEIR	2	P07237	P4HB	71	KAAGKLkAEGSEI
8	ALAPEYAK	1	P07237	P4HB	65	LAPEYAkAAGKLK
10	EADDIVNWLKK	4	P07237	P4HB	130	DIVNWLkKRTGPA
2	GKILFIFIDSDHTDNQR	1	P07237	P4HB	285	AESFKGkILFIFI
6	GYPTIKFFR	1	P07237	P4HB	103	RGYPTIkFFRNGD
1	KEECPAVR	2	P07237	P4HB	309	EFFGLKkEECPAV
1	KSNFAEALAAHK	2	P07237	P4HB	31	HVLVLRkSNFAEA
3	LAKVDATEESDLAQQYGVR	2	P07237	P4HB	81	SEIRLAkVDATEE
8	ILEFFGLKK	2	P07237	P4HB	308	LEFFGLkKEECPA
10	LITLEEEMTKYKPESEELTAER	5	P07237	P4HB	326	LEEEMTkYKPESE
12	LITLEEEMTKYKPESEELTAER	1	P07237	P4HB	328	EEMTKYkPESEEL
12	MDSTANEVEAVKVHSFPTLK	1	P07237	P4HB	436	NEVEAVkVHSFPT
8	NGDTASPKEYTAGR	3	P07237	P4HB	114	GDTASPkEYTAGR
8	SVSDYDGKLSNFK	1	P07237	P4HB	271	VSDYDGkLSNFKT
7	TAAESFKGK	2	P07237	P4HB	283	TAAESFkGKILFI
8	VHSFPTLKFFPASADR	1	P07237	P4HB	444	HSFPTLkFFPASA
5	YQLDKDGVVLFKK	2	P07237	P4HB	200	SKYQLDkDGVVLF
11	YIVPMLTVDGKR	1	P14550	AKR1A1	308	MLTVDGkRVPRDA
3	LIKLVGER	1	P82673	MRPS35	192	AKKKLIkLVGERY
7	AAQNISKTIATSQNR	1	Q99623	PHB2	262	AAQNISkTIATSQ
2	QKIVQAEGEAEAAK	1	Q99623	PHB2	224	KQEQRQkIVQAEG
12	IIETLTQQLQAKGK	2	Q9UHV9	PFDN2	111	TQQLQAkGKELNE
8	SSGSGAGKGAVSAEQVIAGFNR	4	Q9UHV9	PFDN2	18	SGSGAGkGAVSAE
2	IKKTIQGDEEDLR	1	P54920	NAPA	284	TMLLRIkKTIQGD
3	IKKTIQGDEEDLR	1	P54920	NAPA	285	MLLRIKkTIQGDE
3	DGKLPLLLSR	1	P49902	NT5C2	231	YVVKDGkLPLLLS
6	TSVDFKDTDYKR	1	P49902	NT5C2	515	RTSVDFkDTDYKR
9	YTSCETGFKDGDLFMSYR	1	P49902	NT5C2	186	SCETGFkDGDLFM
5	VMFDKITSR	2	P23921	RRM1	17	ERVMFDkITSRIQ
1	KAEVVQVIR	1	Q9H6F5	CCDC86	315	RLENERkAEVVQV
3	SYKPVFWSPSSR	1	Q9NSE4	IARS2	241	LVYRSYkPVFWSP
3	ILKSLGELGLEHFQAPLVR	1	Q9NZT2	OGFR	218	RITRILkSLGELG
10	LTLSALVDGKSINAGGHK	1	P45880	VDAC2	277	SALVDGkSINAGG
4	TSQKFGQWADSR	1	Q86YM7	HOMER1	73	FTKTSQkFGQWAD
12	SIRPDNMSEYSKQMQR	1	Q13547	HDAC1	89	NMSEYSkQMQRFN
1	KEFFLQR	1	O15067	PFAS	639	LGKMPRkEFFLQR
2	AKVEFNIR	1	Q8NC51	SERBP1	303	QNKDRAkVEFNIR
1	KEAGGGGVGGPGAK	1	Q8NC51	SERBP1	39	AAENKKkEAGGGG
1	KPNEGADGQWK	3	Q8NC51	SERBP1	310	VEFNIRkPNEGAD
11	RPDQQLQGEGKIIDRRPER	1	Q8NC51	SERBP1	122	QLQGEGkIIDRRP
16	SAAQAAAQTNSNAAGKQLR	1	Q8NC51	SERBP1	68	NSNAAGkQLRKES
2	IKAVEGQTR	1	Q15599	SLC9A3R2	77	QVVQRIkAVEGQT
4	CLIKNPAER	1	Q02750	MAP2K1	344	VNKCLIkNPAERA
1	KLEELELDEQQRK	1	Q02750	MAP2K1	36	LEALQKkLEELEL
1	KDSAIQQQVANLQMK	1	Q14204	DYNC1H1	1228	NDIMRRkDSAIQQ
1	KYEFGESDLR	1	Q14204	DYNC1H1	4204	PLGWSKkYEFGES
11	IFVFEPPPGVKANMLR	2	Q14204	DYNC1H1	4154	EPPPGVkANMLRT
13	LGGSPFGPAGTGKTESVK	1	Q14204	DYNC1H1	1912	GPAGTGkTESVKA
2	MKLNTQEIFDDWAR	1	Q14204	DYNC1H1	692	GDSFRMkLNTQEI
4	QLEKSLLQALNEVK	1	Q14204	DYNC1H1	3747	RLRQLEkSLLQAL
10	SLLQALNEVKGR	1	Q14204	DYNC1H1	3757	QALNEVkGRILDD
6	TVENIKDPLFR	1	Q14204	DYNC1H1	4406	RTVENIkDPLFRF
1	KSKDTVSEDTIR	1	Q96E11	MRRF	221	SMNKLKkSKDTVS
2	VKELEVR	1	O43674	NDUFB5	152	KAELRVkELEVRK
14	THLPGFVEQAEALKAK	1	P30044	PRDX5	116	EQAEALkAKGVQV
1	KLDQTIAR	1	Q92925	SMARCD2	168	LLAFERkLDQTIA
1	KAEGGGAEEGAGAR	1	Q10570	CPSF1	912	PKPSKKkAEGGGA
4	AAVKGYLGPEQLPDCLK	3	P40926	MDH2	78	ETKAAVkGYLGPE
9	ANTFVAELKGLDPAR	6	P40926	MDH2	185	TFVAELkGLDPAR
4	GIEKNLGIGK	1	P40926	MDH2	301	GKKGIEkNLGIGK
1	KGEDFVK	2	P40926	MDH2	329	LKASIKkGEDFVK
1	KHGVYNPNK	1	P40926	MDH2	157	TAEVFKkHGVYNP
10	IQEAGTEVVKAK	1	P40926	MDH2	239	AGTEVVkAKAGAG
22	LTLYDIAHTPGVAADLSHIETKAAVK	2	P40926	MDH2	74	LSHIETkAAVKGY
6	NLGIGKVSSFEEK	2	P40926	MDH2	307	KNLGIGkVSSFEE
17	SQETECTYFSTPLLLGKK	2	P40926	MDH2	296	TPLLLGkKGIEKN
19	VAVLGASGGIGQPLSLLLKNSPLVSR	1	P40926	MDH2	45	PLSLLLkNSPLVS
7	VSSFEEKMISDAIPELK	1	P40926	MDH2	314	VSSFEEkMISDAI
1	KFESLFPGKLEVVR	2	Q13045	FLII	1007	TFSLQKkFESLFP
2	HKAAAYDISEDEED	1	P49585	PCYT1A	355	ANLSRHkAAAYDI
11	AAYFGIYDTAK	1	P05141	SLC25A5	199	GIYDTAkGMLPDP
4	AFFKGAWSNVLR	5	P05141	SLC25A5	272	GGKAFFkGAWSNV
5	DEGGKAFFK	4	P05141	SLC25A5	268	ARDEGGkAFFKGA
13	DFLAGGVAAAISKTAVAPIER	2	P05141	SLC25A5	23	VAAAISkTAVAPI
8	GLGDCLVKIYK	1	P05141	SLC25A5	163	LGDCLVkIYKSDG
1	KGTDIMYTGTLDCWR	10	P05141	SLC25A5	245	MMQSGRkGTDIMY
7	LAADVGKAGAER	3	P05141	SLC25A5	147	LAADVGkAGAERE
3	IPKEQGVLSFWR	3	P05141	SLC25A5	63	CVVRIPkEQGVLS
3	IYKSDGIK	1	P05141	SLC25A5	166	CLVKIYkSDGIKG
10	MTDAAVSFAKDFLAGGVAAAISK	3	P05141	SLC25A5	10	AAVSFAkDFLAGG
9	QIFLGGVDKR	1	P05141	SLC25A5	105	FLGGVDkRTQFWL
2	VKLLLQVQHASK	1	P05141	SLC25A5	33	APIERVkLLLQVQ
14	YFPTQALNFAFKDKYK	1	P05141	SLC25A5	94	NFAFKDkYKQIFL
4	AGAKDILVATDVAGR	1	Q9BUQ8	DDX23	715	NLKAGAkDILVAT
2	KKAEEEAEAKPK	1	Q9BUQ8	DDX23	152	ELLAKKkAEEEAE
1	KAGEMLGR	1	Q9UJ70	NAGK	237	SRYIFRkAGEMLG
1	KAGVDPLVPLR	2	Q9UJ70	NAGK	59	VNRAKRkAGVDPL
1	KIAEGAQQGDPLSR	2	Q9UJ70	NAGK	219	FAGFCRkIAEGAQ
12	ADLINNLGTIAKSGTK	6	P08238	HSP90AB1	107	NLGTIAkSGTKAF
2	AKFENLCK	2	P08238	HSP90AB1	559	MEESKAkFENLCK
11	DNSTMGYMMAKK	1	P08238	HSP90AB1	623	MGYMMAkKHLEIN
2	EKYIDQEELNK	4	P08238	HSP90AB1	275	TKKIKEkYIDQEE
12	ELISNASDALDKIR	3	P08238	HSP90AB1	53	ASDALDkIRYESL
7	EMLQQSKILK	2	P08238	HSP90AB1	399	EMLQQSkILKVIR
7	FYEAFSKNLK	1	P08238	HSP90AB1	435	FYEAFSkNLKLGI
20	GFEVVYMTEPIDEYCVQQLK	3	P08238	HSP90AB1	526	YCVQQLkEFDGKS
3	GTKVILHLKEDQTEYLEER	2	P08238	HSP90AB1	180	PIGRGTkVILHLK
1	KFYEAFSK	1	P08238	HSP90AB1	428	DKENYKkFYEAFS
1	KHLEINPDHPIVETLR	4	P08238	HSP90AB1	624	GYMMAKkHLEINP
1	KHSQFIGYPITLYLEK	6	P08238	HSP90AB1	204	VKEVVKkHSQFIG
2	IKEKYIDQEELNK	2	P08238	HSP90AB1	273	KKTKKIkEKYIDQ
3	ILKVIR	1	P08238	HSP90AB1	402	QQSKILkVIRKNI
3	IMKAQALR	2	P08238	HSP90AB1	607	NMERIMkAQALRD
6	MKETQKSIYYITGESK	1	P08238	HSP90AB1	481	RMKETQkSIYYIT
3	NLKLGIHEDSTNR	2	P08238	HSP90AB1	438	AFSKNLkLGIHED
10	SIYYITGESKEQVANSAFVER	2	P08238	HSP90AB1	491	YITGESkEQVANS
13	TLTLVDTGIGMTKADLINNLGTIAK	1	P08238	HSP90AB1	95	TGIGMTkADLINN
3	VEKVTISNR	1	P08238	HSP90AB1	577	LDKKVEkVTISNR
9	YIDQEELNKTKPIWTR	2	P08238	HSP90AB1	284	DQEELNkTKPIWT
7	VEENFLKLTHVQR	1	Q96A33	CCDC47	419	VEENFLkLTHVQR
10	MADAAPQLGKR	1	Q96C86	DCPS	10	AAPQLGkRKRELD
1	KQGTDAVR	1	Q92882	OSTF1	192	ASLLKKkQGTDAV
5	LEQQKQTVQMR	1	O14964	HGS	551	MRLEQQkQTVQMR
2	QKKQEYLEVQR	1	O14964	HGS	520	LEIMRQkKQEYLE
3	QKKQEYLEVQR	1	O14964	HGS	521	EIMRQKkQEYLEV
7	QIQLAQKLEIMR	1	O14964	HGS	513	QIQLAQkLEIMRQ
6	AFGQAKHQPTAIIAK	1	P29401	TKT	232	KAFGQAkHQPTAI
9	AVELAANTKGICFIR	1	P29401	TKT	465	ELAANTkGICFIR
8	GITGVEDKESWHGKPLPK	1	P29401	TKT	254	ITGVEDkESWHGK
1	KAYGQALAK	1	P29401	TKT	319	DKIATRkAYGQAL
1	KKILATPPQEDAPSVDIANIR	1	P29401	TKT	282	SQIQSKkKILATP
2	KKILATPPQEDAPSVDIANIR	1	P29401	TKT	283	QIQSKKkILATPP
1	KLILDSAR	1	P29401	TKT	543	IKPLDRkLILDSA
1	KISSDLDGHPVPK	2	P29401	TKT	102	ELLNLRkISSDLD
18	LGQSDPAPLQHQMDIYQKR	1	P29401	TKT	204	QMDIYQkRCEAFG
9	IIALDGDTKNSTFSEIFKK	1	P29401	TKT	343	ALDGDTkNSTFSE
5	LQALKDTANR	2	P29401	TKT	16	QKLQALkDTANRL
11	MESYHKPDQQKLQALKDTANR	4	P29401	TKT	11	HKPDQQkLQALKD
17	NMAEQIIQEIYSQIQSKKK	2	P29401	TKT	281	YSQIQSkKKILAT
3	SGKPAELLK	1	P29401	TKT	597	RVPRSGkPAELLK
9	SGKPAELLKMFGIDRDAIAQAVR	1	P29401	TKT	603	KPAELLkMFGIDR
8	VLDPFTIKPLDR	4	P29401	TKT	538	LDPFTIkPLDRKL
4	YFDKASYR	1	P29401	TKT	144	TGKYFDkASYRVY
2	YKSQDPR	2	P29401	TKT	59	FHTMRYkSQDPRN
3	LEKIHPTGK	1	P35244	RPA3	33	FVGRLEkIHPTGK
6	IHPTGKMFILSDGEGK	1	P35244	RPA3	39	KIHPTGkMFILSD
6	LEQTQKSKPVFSESLSD	1	O60220	TIMM8A	86	RLEQTQkSKPVFS
5	HLFEKELAGQSR	2	O00515	LAD1	447	KRHLFEkELAGQS
1	KENSETTLTR	1	O00515	LAD1	382	FRMKPKkENSETT
17	LIDLHTNVATAVLEHIKAR	1	Q8WVM8	SCFD1	414	AVLEHIkARKLDV
13	SYDLTPVDKFWQKHK	1	Q8WVM8	SCFD1	328	VDKFWQkHKGSPF
1	KVTSVVFHPSQDLVFSASPDATIR	1	Q9UMS4	PRPF19	266	LKGHTKkVTSVVF
4	LQDKATVLTTER	3	Q9UMS4	PRPF19	179	IQKLQDkATVLTT
3	LTKEVTAAR	1	Q9UMS4	PRPF19	122	VIARLTkEVTAAR
2	CKDISSALR	1	P13489	RNH1	46	LTEARCkDISSAL
10	EGQEDQGLTKDYGNSPLHR	2	P26599	PTBP1	428	EDQGLTkDYGNSP
3	ELKTDSSPNQAR	1	P26599	PTBP1	137	SNHKELkTDSSPN
5	IDFSKLTSLNVK	2	P26599	PTBP1	259	LRIDFSkLTSLNV
7	LTSLNVKYNNDK	1	P26599	PTBP1	266	LTSLNVkYNNDKS
13	MDGIVPDIAVGTKR	3	P26599	PTBP1	13	DIAVGTkRGSDEL
8	VSMVGQVKQCEGITSPEGSK	1	Q9Y570	PPME1	236	SMVGQVkQCEGIT
2	AKEFTNVYIK	1	Q13310	PABPC4	188	ELGAKAkEFTNVY
4	AIEKMNGMLLNDR	2	Q13310	PABPC4	157	ADKAIEkMNGMLL
1	KAHLTNQYMQR	1	Q13310	PABPC4	375	QRKEERkAHLTNQ
2	SKGFGFVCFSSPEEATK	2	Q13310	PABPC4	333	LEDGRSkGFGFVC
14	AVFQANQENLPILKR	2	P05023	ATP1A1	444	ENLPILkRAVAGD
3	SSKIMESFK	1	P05023	ATP1A1	156	QEAKSSkIMESFK
14	MPTTQQSPQDEQEKLLDEAIQAVK	1	Q96QK1	VPS35	14	PQDEQEkLLDEAI
7	VETAITKVR	1	Q15061	WDR43	391	VETAITkVRTPVM
1	KQLQAIEFNK	1	O76094	SRP72	301	EFKLSKkQLQAIE
8	AMEWITAKLK	1	Q01813	PFKP	700	MEWITAkLKEARG
1	KFLEHLSGAGK	1	Q01813	PFKP	15	PKGSLRkFLEHLS
4	LAIKLPDDQIPK	1	Q01813	PFKP	400	YKRLAIkLPDDQI
10	MDADDSRAPKGSLR	1	Q01813	PFKP	10	DDSRAPkGSLRKF
6	NGQIDKEAVQK	1	Q01813	PFKP	156	RNGQIDkEAVQKY
11	NVIFQPVAELKK	1	Q01813	PFKP	736	QPVAELkKQTDFE
10	SFAGNLNTYKR	1	Q01813	PFKP	395	GNLNTYkRLAIKL
1	KIHIDLPNEQAR	1	P62333	PSMC6	298	PGRLDRkIHIDLP
5	LDILKIHAGPITK	1	P62333	PSMC6	314	ARLDILkIHAGPI
9	VVSSSIVDKYIGESAR	1	P62333	PSMC6	206	SSSIVDkYIGESA
6	DAMVAKVNTSK	1	P00568	AK1	83	RDAMVAkVNTSKG
1	KLSEIMEK	1	P00568	AK1	56	GSARGKkLSEIME
4	IVQKYGYTHLSTGDLLR	1	P00568	AK1	31	CEKIVQkYGYTHL
11	SVSHGSNHTQKPDEQR	1	Q9Y520	PRRC2C	934	GSNHTQkPDEQRS
4	VAIKTVNEAASMR	1	P08069	IGF1R	1033	ETRVAIkTVNEAA
1	KTLDPDPAIR	2	P55060	CSE1L	17	LTEYLKkTLDPDP
1	KCDLISIPK	1	Q9ULV4	CORO1C	419	KPTANKkCDLISI
1	KQEIVAEKEK	1	Q9ULV4	CORO1C	205	RVIDPRkQEIVAE
1	KTTDTASVQNEAK	1	Q9ULV4	CORO1C	428	LISIPKkTTDTAS
3	SIKDTICNQDER	1	Q9ULV4	CORO1C	452	KEIKSIkDTICNQ
7	AGPPPEKR	1	Q9BUJ2	HNRNPUL1	607	AGPPPEkRFDNRG
1	KRPYEENR	2	Q9BUJ2	HNRNPUL1	172	QQFQSRkRPYEEN
3	ELKQLYLER	1	P61160	ACTR2	322	RLERELkQLYLER
1	KVVVCDNGTGFVK	2	P61160	ACTR2	7	MDSQGRkVVVCDN
4	VLEKLGVTVR	1	P61160	ACTR2	388	GVRVLEkLGVTVR
5	AHLEKESIAQR	1	Q9Y673	ALG5	202	SRAHLEkESIAQR
4	LGDKHATLQK	1	Q13263	TRIM28	266	VKRLGDkHATLQK
4	LQEKLSPPYSSPQEFAQDVGR	3	Q13263	TRIM28	750	RARLQEkLSPPYS
5	LTEDKADVQSIIGLQR	2	Q13263	TRIM28	779	NKLTEDkADVQSI
31	MAASAAAASAAAASAASGSPGPGEGSAGGEKR	1	Q13263	TRIM28	31	GSAGGEkRSTAPS
4	QFNKLTEDKADVQSIIGLQR	1	Q13263	TRIM28	774	MFKQFNkLTEDKA
6	QQCFSKDIVENYFMR	1	Q13263	TRIM28	127	KQQCFSkDIVENY
8	VLVNDAQKVTEGQQER	1	Q13263	TRIM28	319	LVNDAQkVTEGQQ
3	YTKDHTVR	1	Q13263	TRIM28	188	QRVKYTkDHTVRS
1	KKLLADQAEAR	1	P84098	RPL19	152	KADKARkKLLADQ
2	KKLLADQAEAR	1	P84098	RPL19	153	ADKARKkLLADQA
1	KKVWLDPNETNEIANANSR	4	P84098	RPL19	20	VLRCGKkKVWLDP
2	KKVWLDPNETNEIANANSR	4	P84098	RPL19	21	LRCGKKkVWLDPN
1	KLIKDGLIIR	2	P84098	RPL19	43	SRQQIRkLIKDGL
1	KPVTVHSR	1	P84098	RPL19	53	DGLIIRkPVTVHS
3	LIKDGLIIR	3	P84098	RPL19	46	QIRKLIkDGLIIR
4	LQAKKEEIIK	3	P84098	RPL19	180	EERLQAkKEEIIK
5	LQAKKEEIIK	2	P84098	RPL19	181	ERLQAKkEEIIKT
4	MPEKVTWMR	3	P84098	RPL19	92	NARMPEkVTWMRR
7	AAVDYQKVVR	1	P31153	MAT2A	81	AAVDYQkVVREAV
5	DLDLKKPIYQR	2	P31153	MAT2A	367	VRDLDLkKPIYQR
1	KEAVQTAAK	1	Q9ULA0	DNPEP	21	MNGKARkEAVQTA
2	TKSLSFR	1	P60228	EIF3E	409	QVIEKTkSLSFRS
2	LKHLNLGMNR	1	Q15404	RSU1	89	SSLQKLkHLNLGM
13	QWNNCAFLESSAKSK	1	P61224	RAP1B	149	FLESSAkSKINVN
1	KTEYISTEFNR	1	Q8N7H5	PAF1	133	VVPWMRkTEYIST
3	QQKLQEEQR	1	Q86TS9	MRPL52	97	WQLRQQkLQEEQR
6	VSSVFKDEATVR	1	P46060	RANGAP1	481	KVSSVFkDEATVR
6	VDQAGKSSDNR	1	Q14011	CIRBP	84	RVDQAGkSSDNRS
5	QFHFKDFNR	1	P61457	PCBD1	41	FKQFHFkDFNRAF
1	KVVDPETGRTR	1	Q66PJ3	ARL6IP4	370	RQSIIRkVVDPET
9	FAVEEIIQKQVK	3	Q9BS40	LXN	64	VEEIIQkQVKVNC
6	VFEVQKVKQASMEDIPGR	1	Q9BS40	LXN	36	RVFEVQkVKQASM
8	VFEVQKVKQASMEDIPGR	1	Q9BS40	LXN	38	FEVQKVkQASMED
2	VKHNSRLPK	1	Q9BS40	LXN	210	QYGTKVkHNSRLP
10	KHINTWVAEKTEGK	1	P35237	SERPINB6	141	NTWVAEkTEGKIA
2	AKSEENTKEEKPDSK	1	P50502	ST13	50	PATQKAkSEENTK
10	AIDLFTDAIKLNPR	1	P50502	ST13	142	LFTDAIkLNPRLA
13	AIEINPDSAQPYKWR	2	P50502	ST13	186	DSAQPYkWRGKAH
3	AQKIAEHR	1	P50502	ST13	230	VQPRAQkIAEHRR
7	LAILYAKR	1	P50502	ST13	153	LAILYAkRASVFV
3	MCKQDPSVLHTEEMR	1	P50502	ST13	17	AFVKMCkQDPSVL
6	SEENTKEEKPDSK	3	P50502	ST13	56	KSEENTkEEKPDS
2	VKEQLAFQVEQVKR	1	O75146	HIP1R	489	EEVARVkEQLAFQ
15	MSELDQLRQEAEQLKNQIR	1	P62873	GNB1	15	QEAEQLkNQIRDA
12	KQKPLDFSTNQKLSAFAFK	1	O75717	WDHD1	1120	DFSTNQkLSAFAF
6	AAEEAKSAIAK	3	P35241	RDX	400	RAAEEAkSAIAKQ
2	AKFFPEDVSEELIQEITQR	1	P35241	RDX	83	QFKFRAkFFPEDV
3	AQKELEEQTR	1	P35241	RDX	363	QTIKAQkELEEQT
3	EEKHQKQLER	1	P35241	RDX	313	AQAREEkHQKQLE
2	EKEELMER	1	P35241	RDX	344	ERIEREkEELMER
7	ENPLQFKFR	3	P35241	RDX	79	ENPLQFkFRAKFF
1	KALELDQER	1	P35241	RDX	371	LEEQTRkALELDQ
1	KAPDFVFYAPR	1	P35241	RDX	263	IKPIDKkAPDFVF
1	KENPLQFK	1	P35241	RDX	72	TQQDVKkENPLQF
11	KPDTIEVQQMKAQAR	4	P35241	RDX	306	IEVQQMkAQAREE
1	KTQNDVLHAENVK	1	P35241	RDX	544	ARDETKkTQNDVL
1	KVTQQDVK	1	P35241	RDX	64	WLKLNKkVTQQDV
8	IALLEEAKK	2	P35241	RDX	435	ALLEEAkKKKEEE
4	AYQKQPTIFQNK	1	P62280	RPS11	12	TERAYQkQPTIFQ
18	DVQIGDIVTVGECRPLSKTVR	1	P62280	RPS11	136	ECRPLSkTVRFNV
10	EAIEGTYIDKK	3	P62280	RPS11	58	EGTYIDkKCPFTG
5	FNVLKVTK	2	P62280	RPS11	144	VRFNVLkVTKAAG
8	ILSGVVTKMK	1	P62280	RPS11	79	LSGVVTkMKMQRT
7	NIGLGFKTPK	2	P62280	RPS11	45	NIGLGFkTPKEAI
3	TPKEAIEGTYIDKK	1	P62280	RPS11	48	LGFKTPkEAIEGT
8	VLLGETGKEK	6	P62280	RPS11	30	LLGETGkEKLPRY
10	VLLGETGKEKLPR	4	P62280	RPS11	32	GETGKEkLPRYYK
4	FAGKVTTASVK	1	Q92616	GCN1	17	LKRFAGkVTTASV
2	MKIDPEAFITR	2	Q92616	GCN1	695	ALLARMkIDPEAF
2	SKADYTSHLR	1	Q92616	GCN1	2183	IYCSRSkADYTSH
5	AEVQKLQMEAPHIIVGTPGR	2	P60842	EIF4A1	146	VRAEVQkLQMEAP
7	AILPCIKGYDVIAQAQSGTGK	2	P60842	EIF4A1	68	AILPCIkGYDVIA
3	GFKDQIYDIFQK	3	P60842	EIF4A1	193	MLSRGFkDQIYDI
9	GIYAYGFEKPSAIQQR	3	P60842	EIF4A1	54	YAYGFEkPSAIQQ
12	GVAINMVTEEDKR	5	P60842	EIF4A1	381	MVTEEDkRTLRDI
1	KGVAINMVTEEDKR	4	P60842	EIF4A1	369	GGRFGRkGVAINM
1	KVDWLTEK	1	P60842	EIF4A1	284	FINTRRkVDWLTE
5	YLSPKYIK	1	P60842	EIF4A1	174	RRYLSPkYIKMFV
1	KGINTLVTYDMVPEPK	11	P20674	COX5A	72	DAWELRkGINTLV
16	KGINTLVTYDMVPEPK	4	P20674	COX5A	87	DMVPEPkIIDAAL
8	VIQEIVDKSGVVR	2	P51114	FXR1	310	IQEIVDkSGVVRV
10	ANGQENGHVKSNGDLSPK	2	P49006	MARCKSL1	35	QENGHVkSNGDLS
6	CTLAEKLGGSAVISLEGKPL	3	P23528	CFL1	152	RCTLAEkLGGSAV
12	HELQANCYEEVKDR	4	P23528	CFL1	144	NCYEEVkDRCTLA
1	KAVLFCLSEDKK	2	P23528	CFL1	34	EVKKRKkAVLFCL
12	KAVLFCLSEDKK	1	P23528	CFL1	45	CLSEDKkNIILEE
1	KSSTPEEVK	3	P23528	CFL1	22	NDMKVRkSSTPEE
13	MASGVAVSDGVIK	6	P23528	CFL1	13	VSDGVIkVFNDMK
19	MASGVAVSDGVIKVFNDMKVR	4	P23528	CFL1	19	KVFNDMkVRKSST
5	MLPDKDCR	2	P23528	CFL1	78	VKMLPDkDCRYAL
7	MIYASSKDAIK	2	P23528	CFL1	121	MIYASSkDAIKKK
2	SKMIYASSK	5	P23528	CFL1	114	SAPLKSkMIYASS
8	SSTPEEVKKR	1	P23528	CFL1	30	STPEEVkKRKKAV
9	SSTPEEVKKR	1	P23528	CFL1	31	TPEEVKkRKKAVL
11	YALYDATYETK	4	P23528	CFL1	92	DATYETkESKKED
3	LVKSYEAQDPEIASLSGK	2	Q99622	C12orf57	86	KFARLVkSYEAQD
9	IVAMIARGK	1	Q13367	AP3B2	69	AMIARGkNASDLF
8	ALDFIASKGVK	1	P12814	ACTN1	103	LDFIASkGVKLVS
13	CQLEINFNTLQTKLR	2	P12814	ACTN1	344	FNTLQTkLRLSNR
3	DAKGISQEQMNEFR	1	P12814	ACTN1	741	ILTRDAkGISQEQ
1	KAGTQIENIEEDFRDGLK	1	P12814	ACTN1	47	CNSHLRkAGTQIE
14	ICDQWDNLGALTQKR	1	P12814	ACTN1	492	LGALTQkRREALE
7	ATDILPKWLR	2	Q12931	TRAP1	382	ATDILPkWLRFIR
12	ELISNASDALEKLR	1	Q12931	TRAP1	126	ASDALEkLRHKLV
1	KLLDIVAR	1	Q12931	TRAP1	96	FQAETKkLLDIVA
6	MQQLAKTQEER	2	Q12931	TRAP1	629	RMQQLAkTQEERA
4	SDCKEFSSEAR	1	Q12931	TRAP1	262	HLKSDCkEFSSEA
6	SLYSEKEVFIR	2	Q12931	TRAP1	109	RSLYSEkEVFIRE
8	YVAQAHDKPR	1	Q12931	TRAP1	324	VAQAHDkPRYTLH
1	KGFIDGR	1	P15924	DSP	2753	TEEAIRkGFIDGR
1	KLEDSTR	1	P15924	DSP	1916	EERCRRkLEDSTR
1	KQQLEVELR	1	P15924	DSP	1444	SEVSQRkQQLEVE
3	IDKQIDFR	1	P15924	DSP	872	RWQRIDkQIDFRL
5	IQESKNQCTQVVQER	3	P15924	DSP	1802	NRIQESkNQCTQV
5	TIQDKNKEIER	1	P15924	DSP	1323	AKTIQDkNKEIER
5	TIQDKNKEIER	1	P15924	DSP	1479	AKTIQDkNKEIER
8	AHSIQIMKVEEIAASK	3	Q02543	RPL18A	128	HSIQIMkVEEIAA
3	EYKVVGR	1	Q02543	RPL18A	11	GTLREYkVVGRCL
4	FTTKRPNTFF	1	Q02543	RPL18A	170	KPRFTTkRPNTFF
8	VEEIAASKCR	1	Q02543	RPL18A	136	EEIAASkCRRPAV
10	TSTGAPAAIKK	1	P40121	CAPG	137	GAPAAIkKLYQVK
8	GGIMLPEKSQGK	1	P61604	HSPE1	36	GIMLPEkSQGKVL
2	GKGGEIQPVSVK	1	P61604	HSPE1	56	GSGSKGkGGEIQP
1	KFLPLFDR	1	P61604	HSPE1	8	AGQAFRkFLPLFD
8	SAAETVTKGGIMLPEK	2	P61604	HSPE1	28	AAETVTkGGIMLP
4	SQGKVLQATVVAVGSGSK	1	P61604	HSPE1	40	PEKSQGkVLQATV
4	VGDKVLLPEYGGTK	2	P61604	HSPE1	70	SVKVGDkVLLPEY
6	VVLDDKDYFLFR	2	P61604	HSPE1	86	KVVLDDkDYFLFR
9	GAVQSGVDKTK	1	O60664	PLIN3	164	VQSGVDkTKSVVT
16	TLTAAAVSGAQPILSKLEPQIASASEYAHR	1	O60664	PLIN3	84	AQPILSkLEPQIA
8	TVCDAAEKGVR	1	O60664	PLIN3	65	VCDAAEkGVRTLT
6	VLADTKELVSSK	1	O60664	PLIN3	122	KVLADTkELVSSK
11	DLLHPSPEEEKR	1	P42677	RPS27	16	PSPEEEkRKHKKK
5	LAEEKAQASSIPVGSR	2	Q99426	TBCB	153	QRLAEEkAQASSI
[truncated: 2,547 more rows]

## Sheet: Table S5-KP12
1380 Modified Lysine sites by 100 mM KP12 from 500 mg A549 cell lysates
Modification Name	Target Amino Acid	Position in Peptide	Peptide Sequence	Modified PSMs	Protein Accession	Protein Description	Position	Motif
Kpyri-pc	N	2	VNVDKVLER	1	P23763	Vesicle-associated membrane protein 1	51	VDIIRVnVDKVLE
Kpyri-pc	S	2	KSLSDSESDDSKSK	1	Q13185	Chromobox protein homolog 3	93	DGTKRKsLSDSES
Kpyri-pc	K	1	KVEEAEPEEFVVEK	1	Q13185	Chromobox protein homolog 3	21	QNGKSKkVEEAEP
Kpyri-pc	T	6	MASNKTTLQK	1	Q13185	Chromobox protein homolog 3	6	MASNKtTLQKMG
Kpyri-pc	K	2	IKENGAAALDGR	1	P57105	Synaptojanin-2-binding protein	48	IYVSRIkENGAAA
Kpyri-pc	K	14	GILAADESTGSIAKR	2	P04075	Fructose-bisphosphate aldolase A	42	STGSIAkRLQSIG
Kpyri-pc	K	6	IVAPGKGILAADESTGSIAKR	1	P04075	Fructose-bisphosphate aldolase A	28	RIVAPGkGILAAD
Kpyri-pc	T	9	MPYQYPALTPEQKKELSDIAHR	1	P04075	Fructose-bisphosphate aldolase A	9	YQYPALtPEQKKE
Kpyri-pc	K	2	MKGDYYR	1	P63104	14-3-3 protein zeta/delta	122	VFYLKMkGDYYRY
Kpyri-pc	K	22	SVTEQGAELSNEERNLLSVAYKNVVGAR	1	P63104	14-3-3 protein zeta/delta	49	LLSVAYkNVVGAR
Kpyri-pc	K	7	TEGAEKKQQMAR	2	P63104	14-3-3 protein zeta/delta	75	TEGAEKkQQMARE
Kpyri-pc	K	8	VVSSIEQKTEGAEK	6	P63104	14-3-3 protein zeta/delta	68	VSSIEQkTEGAEK
Kpyri-pc	K	8	QLIVGVNK	1	Q05639	Elongation factor 1-alpha 2	154	LIVGVNkMDSTEP
Kpyri-pc	E	3	TIEKFEKEAAEMGK	1	Q05639	Elongation factor 1-alpha 2	40	IDKRTIeKFEKEA
Kpyri-pc	K	4	TIEKFEKEAAEMGK	2	Q05639	Elongation factor 1-alpha 2	41	DKRTIEkFEKEAA
Kpyri-pc	K	1	KVLELTGK	1	A0A0B4J2D5	Glutamine amidotransferase-like class 1 domain-containing protein 3B, mitochondrial	261	IGAMVRkVLELTG
Kpyri-pc	K	1	KFAETQPK	1	P26641	Elongation factor 1-gamma	220	AQFDAKkFAETQP
Kpyri-pc	D	3	KLDPGSEETQTLVR	1	P26641	Elongation factor 1-gamma	403	YTWRKLdPGSEET
Kpyri-pc	K	2	QKPQAERKEEK	1	P26641	Elongation factor 1-gamma	243	SREEKQkPQAERK
Kpyri-pc	K	14	HLQLAIRNDEELNKLLGK	1	Q16777	Histone H2A type 2-C	96	NDEELNkLLGKVT
Kpyri-pc	K	1	KGNYAER	5	Q16777	Histone H2A type 2-C	37	VHRLLRkGNYAER
Kpyri-pc	E	4	NDEELNKLLGK	1	Q16777	Histone H2A type 2-C	93	AIRNDEeLNKLLG
Kpyri-pc	K	14	HLQLAIRNDEELNKLLGR	2	Q7L7L0	Histone H2A type 3	96	NDEELNkLLGRVT
Kpyri-pc	K	1	KGNYSER	1	Q7L7L0	Histone H2A type 3	37	VHRLLRkGNYSER
Kpyri-pc	K	10	FGEVVDCTIKMDPNTGR	3	Q99729	Heterogeneous nuclear ribonucleoprotein A/B	101	VVDCTIkMDPNTG
Kpyri-pc	K	1	KGEGLPNFDNNNIK	1	Q9UBS4	DnaJ homolog subfamily B member 11	302	GAKLWKkGEGLPN
Kpyri-pc	K	2	IKLQIWDTAGQER	1	P61026	Ras-related protein Rab-10	59	LQGKKIkLQIWDT
Kpyri-pc	K	26	VVDYSQFQESDDADEDYGRDSGPPTKK	1	Q9H1E3	Nuclear ubiquitous casein and cyclin-dependent kinase substrate 1	35	DSGPPTkKIRSSP
Kpyri-pc	K	12	IEGDPQGVQQAKR	2	Q00341	Vigilin	494	QGVQQAkRELLEL
Kpyri-pc	K	9	LYERGDASKEDIDTAMK	1	Q16836	Hydroxyacyl-coenzyme A dehydrogenase, mitochondrial	241	ERGDASkEDIDTA
Kpyri-pc	K	5	AAWGKVGAHAGEYGAEALER	1	P69905	Hemoglobin subunit alpha	17	VKAAWGkVGAHAG
Kpyri-pc	H	4	VGAHAGEYGAEALER	2	P69905	Hemoglobin subunit alpha	21	WGKVGAhAGEYGA
Kpyri-pc	E	3	ALEKIDLK	1	P39023	60S ribosomal protein L3	361	TKRRALeKIDLKF
Kpyri-pc	K	8	ALEKIDLKFIDTTSK	1	P39023	60S ribosomal protein L3	366	LEKIDLkFIDTTS
Kpyri-pc	K	8	IGQGYLIKDGK	2	P39023	60S ribosomal protein L3	294	GQGYLIkDGKLIK
Kpyri-pc	K	3	LIKNNASTDYDLSDK	2	P39023	60S ribosomal protein L3	300	KDGKLIkNNASTD
Kpyri-pc	K	14	LKEGDTMMGQQVAKVVESK	1	Q14914	Prostaglandin reductase 1	70	MGQQVAkVVESKN
Kpyri-pc	Q	2	IQPSGGTNINEALLR	1	P19823	Inter-alpha-trypsin inhibitor heavy chain H2	381	RYIEKIqPSGGTN
Kpyri-pc	K	2	MKQTVEAMK	3	P19823	Inter-alpha-trypsin inhibitor heavy chain H2	327	MWGVKMkQTVEAM
Kpyri-pc	K	1	KAQAQPVM	1	P24539	ATP synthase F(0) complex subunit B1, mitochondrial	249	LKLLAKkAQAQPV
Kpyri-pc	K	8	IITGPEIKYTR	1	Q15063	Periostin	761	ITGPEIkYTRIST
Kpyri-pc	S	1	STESLQANVQR	1	P26373	60S ribosomal protein L13	106	PRRRNKsTESLQA
Kpyri-pc	K	7	VITEEEKNFK	1	P26373	60S ribosomal protein L13	174	VITEEEkNFKAFA
Kpyri-pc	K	4	SLGKGSAPPGPVPEGSIR	1	P78417	Glutathione S-transferase omega-1	11	SARSLGkGSAPPG
Kpyri-pc	K	8	LVTTGVLKQTK	2	P07305	Histone H1.0	82	VTTGVLkQTKGVG
Kpyri-pc	K	12	MTENSTSAPAAKPK	1	P07305	Histone H1.0	12	TSAPAAkPKRAKA
Kpyri-pc	K	10	VGENADSQIKLSIK	2	P07305	Histone H1.0	69	NADSQIkLSIKRL
Kpyri-pc	K	14	VGENADSQIKLSIKR	1	P07305	Histone H1.0	73	QIKLSIkRLVTTG
Kpyri-pc	K	10	AEAEAWYQTKFETLQAQAGKHGDDLR	1	P08729	Keratin, type II cytoskeletal 7	286	EAWYQTkFETLQA
Kpyri-pc	K	2	AKQEELEAALQR	3	P08729	Keratin, type II cytoskeletal 7	353	LKDARAkQEELEA
Kpyri-pc	K	7	FLEQQNKLLETK	1	P08729	Keratin, type II cytoskeletal 7	117	FLEQQNkLLETKW
Kpyri-pc	D	2	KDVDAAYMSK	1	P08729	Keratin, type II cytoskeletal 7	200	FVVLKKdVDAAYM
Kpyri-pc	K	1	KLLEGEESR	6	P08729	Keratin, type II cytoskeletal 7	394	EIATYRkLLEGEE
Kpyri-pc	K	9	LQAEIDNIKNQR	1	P08729	Keratin, type II cytoskeletal 7	326	AEIDNIkNQRAKL
Kpyri-pc	S	1	SAYGGPVGAGIR	1	P08729	Keratin, type II cytoskeletal 7	53	PRVAVRsAYGGPV
Kpyri-pc	K	5	TLNNKFASFIDK	2	P08729	Keratin, type II cytoskeletal 7	101	IKTLNNkFASFID
Kpyri-pc	K	12	TLNNKFASFIDKVR	3	P08729	Keratin, type II cytoskeletal 7	108	FASFIDkVRFLEQ
Kpyri-pc	K	10	VRQEESEQIKTLNNK	1	P08729	Keratin, type II cytoskeletal 7	96	EESEQIkTLNNKF
Kpyri-pc	K	8	WTLLQEQKSAK	1	P08729	Keratin, type II cytoskeletal 7	130	TLLQEQkSAKSSR
Kpyri-pc	E	1	EIAQDFKTDLR	2	P84243	Histone H3.3	74	FQRLVReIAQDFK
Kpyri-pc	S	1	STELLIR	3	P84243	Histone H3.3	58	IRRYQKsTELLIR
Kpyri-pc	K	6	VTIMPKDIQLAR	3	P84243	Histone H3.3	123	RVTIMPkDIQLAR
Kpyri-pc	K	10	DVNAAIATIKTKR	2	P0DPH8	Tubulin alpha-3D chain	336	AAIATIkTKRTIQ
Kpyri-pc	K	6	GDVVPKDVNAAIATIK	2	P0DPH8	Tubulin alpha-3D chain	326	RGDVVPkDVNAAI
Kpyri-pc	D	2	LDHKFDLMYAK	1	P0DPH8	Tubulin alpha-3D chain	392	EAWARLdHKFDLM
Kpyri-pc	K	4	LDHKFDLMYAKR	1	P0DPH8	Tubulin alpha-3D chain	394	WARLDHkFDLMYA
Kpyri-pc	K	20	TIGGGDDSFNTFFSETGAGKHVPR	1	P0DPH8	Tubulin alpha-3D chain	60	SETGAGkHVPRAV
Kpyri-pc	N	4	VGINYQPPTVVPGGDLAK	1	P0DPH8	Tubulin alpha-3D chain	356	GFKVGInYQPPTV
Kpyri-pc	K	18	VGINYQPPTVVPGGDLAKVQR	2	P0DPH8	Tubulin alpha-3D chain	370	PGGDLAkVQRAVC
Kpyri-pc	K	10	TIELDGKTIKLQIWDTAGQER	1	P62820	Ras-related protein Rab-1A	61	LDGKTIkLQIWDT
Kpyri-pc	K	9	EFEVYGPIKR	1	P08621	U1 small nuclear ribonucleoprotein 70 kDa	130	EVYGPIkRIHMVY
Kpyri-pc	K	6	TFIAIKPDGVQR	1	P15531	Nucleoside diphosphate kinase A	12	RTFIAIkPDGVQR
Kpyri-pc	K	12	VMLGETNPADSKPGTIR	4	P15531	Nucleoside diphosphate kinase A	100	TNPADSkPGTIRG
Kpyri-pc	K	11	LLLLGAGESGKSTIVK	1	A8MTJ3	Guanine nucleotide-binding protein G(t) subunit alpha-3	46	GAGESGkSTIVKQ
Kpyri-pc	K	12	ELISNASDALDKIR	3	P14625	Endoplasmin	114	ASDALDkIRLISL
Kpyri-pc	E	2	KEAESSPFVER	1	P14625	Endoplasmin	548	AGSSRKeAESSPF
Kpyri-pc	K	1	KTFEINPR	2	P14625	Endoplasmin	683	YYASQKkTFEINP
Kpyri-pc	K	1	KTLDMIK	1	P14625	Endoplasmin	467	RKKLVRkTLDMIK
Kpyri-pc	N	1	NKEIFLR	2	P14625	Endoplasmin	96	INSLYKnKEIFLR
Kpyri-pc	K	7	NLGTIAKSGTSEFLNK	2	P14625	Endoplasmin	168	NLGTIAkSGTSEF
Kpyri-pc	K	3	SEKFAFQAEVNR	1	P14625	Endoplasmin	75	LREKSEkFAFQAE
Kpyri-pc	K	1	KIQNDAGVR	2	Q96AE4	Far upstream element-binding protein 1	300	NGEMIKkIQNDAG
Kpyri-pc	T	2	ATDLKNLFSK	1	Q15424	Scaffold attachment factor B1	420	SSTTRAtDLKNLF
Kpyri-pc	K	3	MAKPLTDSEKR	1	P11216	Glycogen phosphorylase, brain form	3	MAkPLTDSE
Kpyri-pc	K	8	KVGDDIAKATGDWK	1	P30050	60S ribosomal protein L12	48	VGDDIAkATGDWK
Kpyri-pc	K	11	IVNSAQTGSFKQLTVK	1	O75964	ATP synthase subunit g, mitochondrial	66	AQTGSFkQLTVKE
Kpyri-pc	K	13	MVIITGPPEAQFKAQGR	3	Q9NZI8	Insulin-like growth factor 2 mRNA-binding protein 1	465	PPEAQFkAQGRIY
Kpyri-pc	K	13	MVIITGPPEAQFKAQGR	3	Q9Y6M1	Insulin-like growth factor 2 mRNA-binding protein 2	487	PPEAQFkAQGRIF
Kpyri-pc	K	3	AAKLSEGSQPAEEEEDQETPSR	2	Q9UKV3	Apoptotic chromatin condensation inducer in the nucleus	238	RQARAAkLSEGSQ
Kpyri-pc	H	2	LHVDPENFR	3	P02042	Hemoglobin subunit delta	98	LHCDKLhVDPENF
Kpyri-pc	S	2	FSPDDKYSR	1	Q9NPE3	H/ACA ribonucleoprotein complex subunit 3	36	AHPARFsPDDKYS
Kpyri-pc	K	2	IKEIAVTVK	1	Q99832	T-complex protein 1 subunit eta	137	LAVNKIkEIAVTV
Kpyri-pc	K	1	KIFVGGIKEDTEEYNLR	1	P51991	Heterogeneous nuclear ribonucleoprotein A3	127	AHLTVKkIFVGGI
Kpyri-pc	K	10	GTEVQVDDIKR	1	Q9Y230	RuvB-like 2	427	VQVDDIkRVYSLF
Kpyri-pc	K	8	IGSNYSVKTVEK	1	Q9Y6N5	Sulfide:quinone oxidoreductase, mitochondrial	173	GSNYSVkTVEKTW
Kpyri-pc	N	3	VLNDKFASFIDK	1	Q7RTS7	Keratin, type II cytoskeletal 74	148	EQIKVLnDKFASF
Kpyri-pc	K	7	MSGGLLKALR	2	P52298	Nuclear cap-binding protein subunit 2	7	MSGGLLkALRSDS
Kpyri-pc	K	3	ALKLLKTEL	2	O95994	Anterior gradient protein 2 homolog	169	NMKKALkLLKTEL
Kpyri-pc	K	17	LYAYEPADTALLLDNMKK	1	O95994	Anterior gradient protein 2 homolog	165	LLLDNMkKALKLL
Kpyri-pc	K	22	YSNRLYAYEPADTALLLDNMKK	1	O95994	Anterior gradient protein 2 homolog	166	LLDNMKkALKLLK
Kpyri-pc	K	4	AVLKFAAATGATPIAGR	2	P08865	40S ribosomal protein SA	89	GQRAVLkFAAATG
Kpyri-pc	K	23	FLAAGTHLGGTNLDFQMEQYIYKR	2	P08865	40S ribosomal protein SA	40	MEQYIYkRKSDGI
Kpyri-pc	K	11	KSDGIYIINLKR	2	P08865	40S ribosomal protein SA	52	IYIINLkRTWEKL
Kpyri-pc	K	16	VAVEYLDPSPEVQKKK	1	O43684	Mitotic checkpoint protein BUB3	218	PEVQKKkYAFKCH
Kpyri-pc	K	1	KLAPEYEK	1	P13667	Protein disulfide-isomerase A4	211	WCGHCKkLAPEYE
Kpyri-pc	K	8	IANILKDKDPPIPVAK	1	P13667	Protein disulfide-isomerase A4	111	ANILKDkDPPIPV
Kpyri-pc	K	11	QLEPVYNSLAKK	1	P13667	Protein disulfide-isomerase A4	570	VYNSLAkKYKGQK
Kpyri-pc	K	11	VDATAETDLAKR	3	P13667	Protein disulfide-isomerase A4	245	AETDLAkRFDVSG
Kpyri-pc	K	10	HYGGLTGLNKAETAAK	2	P18669	Phosphoglycerate mutase 1	100	GLTGLNkAETAAK
Kpyri-pc	K	1	KAMEAVAAQGK	2	P18669	Phosphoglycerate mutase 1	241	DEETVRkAMEAVA
Kpyri-pc	K	1	KLGEMWNNLNDSEKQPYITK	1	O15347	High mobility group protein B3	126	IGDVAKkLGEMWN
Kpyri-pc	N	2	KNPEVPVNFAEFSK	2	O15347	High mobility group protein B3	31	EEHKKKnPEVPVN
Kpyri-pc	T	3	AVTKYTSSK	1	Q16778	Histone H2B type 2-E	120	EGTKAVtKYTSSK
Kpyri-pc	E	2	KESYSIYVYK	1	Q16778	Histone H2B type 2-E	36	RKRSRKeSYSIYV
Kpyri-pc	K	9	LLLPGELAKHAVSEGTK	2	Q16778	Histone H2B type 2-E	109	LPGELAkHAVSEG
Kpyri-pc	K	6	MPEPAKSAPAPK	5	Q16778	Histone H2B type 2-E	6	MPEPAkSAPAPK
Kpyri-pc	E	3	MPEPAKSAPAPK	8	Q16778	Histone H2B type 2-E	3	MPePAKSAP
Kpyri-pc	K	11	QVHPDTGISSK	2	Q16778	Histone H2B type 2-E	58	DTGISSkAMGIMN
Kpyri-pc	K	6	SAPAPKKGSK	1	Q16778	Histone H2B type 2-E	12	KSAPAPkKGSKKA
Kpyri-pc	K	2	EKDPKYSALR	1	Q6UW68	Transmembrane protein 205	146	YRQLREkDPKYSA
Kpyri-pc	K	1	KLLELDPEHQR	2	P13674	Prolyl 4-hydroxylase subunit alpha-1	230	ALLLTKkLLELDP
Kpyri-pc	T	2	LTSTATKDPEGFVGHPVNAFK	1	P13674	Prolyl 4-hydroxylase subunit alpha-1	67	EKLDRLtSTATKD
Kpyri-pc	D	1	DIDTAAK	2	P05496	ATP synthase F(0) complex subunit C1, mitochondrial	62	TSVVSRdIDTAAK
Kpyri-pc	H	2	KHPDSSVNFAEFSK	1	P26583	High mobility group protein B2	31	EEHKKKhPDSSVN
Kpyri-pc	K	4	SILKIDDVVNTR	1	P50991	T-complex protein 1 subunit delta	531	TVRSILkIDDVVN
Kpyri-pc	K	3	GAKSDPSIVR	1	P61601	Neurocalcin-delta	174	EFIRGAkSDPSIV
Kpyri-pc	K	7	FLEQQNKILLAELEQLKGQGK	1	P08670	Vimentin	129	FLEQQNkILLAEL
Kpyri-pc	K	1	KLLEGEESR	6	P08670	Vimentin	402	EIATYRkLLEGEE
Kpyri-pc	K	1	KVESLQEEIAFLK	1	P08670	Vimentin	223	RLDLERkVESLQE
Kpyri-pc	K	10	ILLAELEQLKGQGK	1	P08670	Vimentin	139	AELEQLkGQGKSR
Kpyri-pc	K	9	LQDEIQNMKEEMAR	8	P08670	Vimentin	373	DEIQNMkEEMARH
Kpyri-pc	K	10	NLQEAEEWYKSK	2	P08670	Vimentin	292	EAEEWYkSKFADL
Kpyri-pc	K	3	QAKQESTEYR	1	P08670	Vimentin	313	DALRQAkQESTEY
Kpyri-pc	Q	1	QAKQESTEYRR	1	P08670	Vimentin	311	NNDALRqAKQEST
Kpyri-pc	K	5	TLLIKTVETR	3	P08670	Vimentin	445	KRTLLIkTVETRD
Kpyri-pc	Y	3	IQYAKTDSDIIAK	1	P09012	U1 small nuclear ribonucleoprotein A	86	KPMRIQyAKTDSD
Kpyri-pc	D	2	ADINTKWAATR	1	P50914	60S ribosomal protein L14	81	QAWQKAdINTKWA
Kpyri-pc	K	5	QAWQKADINTK	1	P50914	60S ribosomal protein L14	79	VRQAWQkADINTK
Kpyri-pc	K	12	ADLINNLGTIAKSGTK	2	P07900	Heat shock protein HSP 90-alpha	112	NLGTIAkSGTKAF
Kpyri-pc	H	2	KHLEINPDHSIIETLR	1	P07900	Heat shock protein HSP 90-alpha	633	YMAAKKhLEINPD
Kpyri-pc	E	4	QKAEADKNDK	1	P07900	Heat shock protein HSP 90-alpha	651	TLRQKAeADKNDK
Kpyri-pc	K	6	CASLQKFGER	1	P02768	Albumin	229	KCASLQkFGERAF
Kpyri-pc	K	1	KVPQVSTPTLVEVSR	3	P02768	Albumin	438	LVRYTKkVPQVST
Kpyri-pc	K	7	ADGIVSKNF	1	P63220	40S ribosomal protein S21	81	ADGIVSkNF
Kpyri-pc	K	3	LAKADGIVSK	3	P63220	40S ribosomal protein S21	74	SILRLAkADGIVS
Kpyri-pc	K	2	MKGDYFR	2	P31946	14-3-3 protein beta/alpha	124	VFYLKMkGDYFRY
Kpyri-pc	K	8	VISSIEQKTERNEK	2	P31946	14-3-3 protein beta/alpha	70	ISSIEQkTERNEK
Kpyri-pc	K	8	MASGADSKGDDLSTAILK	1	P55072	Transitional endoplasmic reticulum ATPase	8	ASGADSkGDDLST
Kpyri-pc	K	18	MASGADSKGDDLSTAILKQK	2	P55072	Transitional endoplasmic reticulum ATPase	18	LSTAILkQKNRPN
Kpyri-pc	K	7	ASDYGMKLPILR	1	Q14165	Malectin	85	ASDYGMkLPILRS
Kpyri-pc	D	2	KDPLEGR	2	Q14165	Malectin	70	GIHFRKdPLEGRV
Kpyri-pc	K	12	AASQPTSLAPEKLREE	2	Q96N66	Lysophospholipid acyltransferase 7	468	TSLAPEkLREE
Kpyri-pc	K	1	KVEDLAR	1	Q9NVP1	ATP-dependent RNA helicase DDX18	370	SATQTRkVEDLAR
Kpyri-pc	K	7	LNLYELKEGR	1	P49720	Proteasome subunit beta type-3	77	LNLYELkEGRQIK
Kpyri-pc	K	1	KLAEQFPR	1	Q96K17	Transcription factor BTF3 homolog 4	115	SLTSLRkLAEQFP
Kpyri-pc	K	8	MNQEKLAK	1	Q96K17	Transcription factor BTF3 homolog 4	8	NQEKLAkLQAQVR
Kpyri-pc	K	1	KLFVQDLATR	2	P33176	Kinesin-1 heavy chain	801	TLHNLRkLFVQDL
Kpyri-pc	S	3	GGSGGGGSISGGGYGSGGGSGGR	1	P35908	Keratin, type II cytoskeletal 2 epidermal	552	SGSRGGsGGGGSI
Kpyri-pc	S	8	GGSGGGGSISGGGYGSGGGSGGR	1	P35908	Keratin, type II cytoskeletal 2 epidermal	557	GSGGGGsISGGGY
Kpyri-pc	K	5	TLNNKFASFIDK	2	P35908	Keratin, type II cytoskeletal 2 epidermal	188	IKTLNNkFASFID
Kpyri-pc	K	12	TLNNKFASFIDKVR	3	P35908	Keratin, type II cytoskeletal 2 epidermal	195	FASFIDkVRFLEQ
Kpyri-pc	K	14	DLDRIAGQVAAANK	1	P39019	40S ribosomal protein S19	143	QVAAANkKH
Kpyri-pc	K	10	GGAGVGSMTKIYGGR	2	P39019	40S ribosomal protein S19	77	GVGSMTkIYGGRQ
Kpyri-pc	K	1	KLTPQGQR	1	P39019	40S ribosomal protein S19	122	DQDGGRkLTPQGQ
Kpyri-pc	K	2	LKVPEWVDTVK	3	P39019	40S ribosomal protein S19	29	KKSGKLkVPEWVD
Kpyri-pc	T	5	MPGVTVKDVNQQEFVR	1	P39019	40S ribosomal protein S19	5	MPGVtVKDVNQ
Kpyri-pc	E	3	MVEKDQDGGR	4	P39019	40S ribosomal protein S19	114	EGLKMVeKDQDGG
Kpyri-pc	K	3	SGKLKVPEWVDTVK	2	P39019	40S ribosomal protein S19	27	FLKKSGkLKVPEW
Kpyri-pc	Q	1	QLALKALNER	1	Q12893	Transmembrane protein 115	285	DAERRRqLALKAL
Kpyri-pc	T	3	ALTVPELTQQMFDAK	1	Q13509	Tubulin beta-3 chain	285	QQYRALtVPELTQ
Kpyri-pc	K	1	KLAVNMVPFPR	7	Q13509	Tubulin beta-3 chain	252	LNADLRkLAVNMV
Kpyri-pc	K	12	ISVYYNEASSHKYVPR	1	Q13509	Tubulin beta-3 chain	58	NEASSHkYVPRAI
Kpyri-pc	E	4	MVMEKPSPLLVGR	2	Q13283	Ras GTPase-activating protein-binding protein 1	4	MVMeKPSPLL
Kpyri-pc	N	1	NEKGYGPATQVR	1	P51610	Host cell factor 1	1987	FRIAARnEKGYGP
Kpyri-pc	K	19	SAAPSTLDSSSTAPAQLGKK	2	Q9Y5M8	Signal recognition particle receptor subunit beta	227	APAQLGkKGKEFE
Kpyri-pc	Q	1	QKADEAYLIGR	1	P11498	Pyruvate carboxylase, mitochondrial	78	TGQMHRqKADEAY
Kpyri-pc	K	10	AQLGGPEAAKSDETAAK	2	P04792	Heat shock protein beta-1	198	GGPEAAkSDETAA
Kpyri-pc	S	1	SLKDRGFELTFK	1	P39656	Dolichyl-diphosphooligosaccharide--protein glycosyltransferase 48 kDa subunit	66	HSLFFRsLKDRGF
Kpyri-pc	K	1	KYDAFLASESLIK	2	P62906	60S ribosomal protein L10a	106	VKKLAKkYDAFLA
Kpyri-pc	K	13	KYDAFLASESLIKQIPR	1	P62906	60S ribosomal protein L10a	118	ASESLIkQIPRIL
Kpyri-pc	K	8	NYDPQKDKR	1	P62906	60S ribosomal protein L10a	47	YDPQKDkRFSGTV
Kpyri-pc	K	4	AVPKEDIYSGGGGGGSR	1	Q13151	Heterogeneous nuclear ribonucleoprotein A0	176	VKKAVPkEDIYSG
Kpyri-pc	K	6	ADVVPKTAENFR	2	P30405	Peptidyl-prolyl cis-trans isomerase F, mitochondrial	73	KADVVPkTAENFR
Kpyri-pc	K	1	KIESFGSK	3	P30405	Peptidyl-prolyl cis-trans isomerase F, mitochondrial	183	GMDVVKkIESFGS
Kpyri-pc	K	6	VVLELKADVVPK	1	P30405	Peptidyl-prolyl cis-trans isomerase F, mitochondrial	67	RVVLELkADVVPK
Kpyri-pc	Q	1	QLKEQQMVMR	1	P61619	Protein transport protein Sec61 subunit alpha isoform 1	393	AKDVAKqLKEQQM
Kpyri-pc	K	3	QLKEQQMVMR	1	P61619	Protein transport protein Sec61 subunit alpha isoform 1	395	DVAKQLkEQQMVM
Kpyri-pc	K	7	IEGLAPKLDPEEMKR	1	Q8N4H5	Mitochondrial import receptor subunit TOM5 homolog	10	IEGLAPkLDPEEM
Kpyri-pc	T	3	AVTKYTSSK	1	Q5QNW6	Histone H2B type 2-F	120	EGTKAVtKYTSSK
Kpyri-pc	K	9	ESYSVYVYKVLK	1	Q5QNW6	Histone H2B type 2-F	44	YSVYVYkVLKQVH
Kpyri-pc	E	2	KESYSVYVYK	1	Q5QNW6	Histone H2B type 2-F	36	RKRSRKeSYSVYV
Kpyri-pc	K	9	LLLPGELAKHAVSEGTK	2	Q5QNW6	Histone H2B type 2-F	109	LPGELAkHAVSEG
Kpyri-pc	D	3	MPDPAKSAPAPK	8	Q5QNW6	Histone H2B type 2-F	3	MPdPAKSAP
Kpyri-pc	K	6	MPDPAKSAPAPK	3	Q5QNW6	Histone H2B type 2-F	6	MPDPAkSAPAPK
Kpyri-pc	K	11	QVHPDTGISSK	2	Q5QNW6	Histone H2B type 2-F	58	DTGISSkAMGIMN
Kpyri-pc	K	6	SAPAPKKGSK	1	Q5QNW6	Histone H2B type 2-F	12	KSAPAPkKGSKKA
Kpyri-pc	K	11	ASLENSLEETKGR	1	P02533	Keratin, type I cytoskeletal 14	363	NSLEETkGRYCMQ
Kpyri-pc	K	7	LASYLDKVR	1	P02533	Keratin, type I cytoskeletal 14	132	LASYLDkVRALEE
Kpyri-pc	S	4	MALSAETESHIYR	1	O14569	Cytochrome b561 domain-containing protein 2	4	MALsAETESH
Kpyri-pc	K	8	NVDVEFFKR	2	P46821	Microtubule-associated protein 1B	2378	VDVEFFkRVRSSY
Kpyri-pc	K	11	TSDVGGYYYEKIER	1	P46821	Microtubule-associated protein 1B	1908	GGYYYEkIERTTK
Kpyri-pc	K	8	MALETVPKDLR	1	P63272	Transcription elongation factor SPT4	8	ALETVPkDLRHLR
Kpyri-pc	K	2	LKELKDQ	1	P61513	60S ribosomal protein L37a	87	SAIRRLkELKDQ
Kpyri-pc	Q	1	QVLAAKER	1	O43399	Tumor protein D54	65	EIVTLRqVLAAKE
Kpyri-pc	W	28	AIKGQVLMSSELEEVFNSMLVGKVPAMWAAK	1	Q8TD57	Dynein heavy chain 3, axonemal	3927	GKVPAMwAAKSYP
Kpyri-pc	E	9	MSDKPDMAEIEKFDKSK	1	P62328	Thymosin beta-4	9	DKPDMAeIEKFDK
Kpyri-pc	T	3	AVTKYTSSK	1	Q99879	Histone H2B type 1-M	120	EGTKAVtKYTSSK
Kpyri-pc	K	9	ESYSVYVYKVLK	1	Q99879	Histone H2B type 1-M	44	YSVYVYkVLKQVH
Kpyri-pc	E	2	KESYSVYVYK	1	Q99879	Histone H2B type 1-M	36	RKRSRKeSYSVYV
Kpyri-pc	K	9	LLLPGELAKHAVSEGTK	2	Q99879	Histone H2B type 1-M	109	LPGELAkHAVSEG
Kpyri-pc	E	3	MPEPVKSAPVPK	3	Q99879	Histone H2B type 1-M	3	MPePVKSAP
Kpyri-pc	K	11	QVHPDTGISSK	2	Q99879	Histone H2B type 1-M	58	DTGISSkAMGIMN
Kpyri-pc	Y	2	GYVKEQFAWR	1	P46783	40S ribosomal protein S10	57	SLKSRGyVKEQFA
Kpyri-pc	S	1	SHYEEGPGK	1	P15954	Cytochrome c oxidase subunit 7C, mitochondrial	17	TSVVRRsHYEEGP
Kpyri-pc	E	1	EKKPEAK	1	Q02878	60S ribosomal protein L6	13	EKPDTKeKKPEAK
Kpyri-pc	E	12	HQEGEIFDTEKEKYEITEQR	1	Q02878	60S ribosomal protein L6	238	IFDTEKeKYEITE
Kpyri-pc	K	7	IDISNVKIPK	1	Q02878	60S ribosomal protein L6	207	IDISNVkIPKHLT
Kpyri-pc	Y	1	YYPTEDVPR	1	Q02878	60S ribosomal protein L6	115	LRKMPRyYPTEDV
Kpyri-pc	K	15	LAETQEEISAEVAAKAER	1	Q9Y383	Putative RNA-binding protein Luc7-like 2	122	SAEVAAkAERVHE
Kpyri-pc	K	8	LVSLIGSKTQIPTQR	1	P25786	Proteasome subunit alpha type-1	115	VSLIGSkTQIPTQ
Kpyri-pc	K	1	KLSLDTDAR	1	Q9NWH9	SAFB-like transcription modulator	746	YWSENKkLSLDTD
Kpyri-pc	K	3	GMKGLVYETSVLDPDEGIR	2	O75390	Citrate synthase, mitochondrial	76	GGMRGMkGLVYET
Kpyri-pc	Q	2	KQIEELKGQEVSPK	1	P09936	Ubiquitin carboxyl-terminal hydrolase isozyme L1	66	ENFRKKqIEELKG
Kpyri-pc	Q	2	MQLKPMEINPEMLNK	1	P09936	Ubiquitin carboxyl-terminal hydrolase isozyme L1	2	MqLKPMEI
Kpyri-pc	T	2	KTDPSGLSK	1	Q13740	CD166 antigen	424	IKMTKKtDPSGLS
Kpyri-pc	K	7	RSDDNEKALK	1	P54819	Adenylate kinase 2, mitochondrial	181	RSDDNEkALKIRL
Kpyri-pc	K	4	IIEKMLNSDKSN	1	P09341	Growth-regulated alpha protein	99	VKKIIEkMLNSDK
Kpyri-pc	K	2	IKLYSESLAR	1	P31150	Rab GDP dissociation inhibitor alpha	210	ETVNRIkLYSESL
Kpyri-pc	S	1	SLEKISR	1	O95831	Apoptosis-inducing factor 1, mitochondrial	292	KIGDFRsLEKISR
Kpyri-pc	K	1	KKEELLK	1	P42766	60S ribosomal protein L35	13	RDLRGKkKEELLK
Kpyri-pc	Q	1	QLDDLKVELSQLR	1	P42766	60S ribosomal protein L35	20	KEELLKqLDDLKV
Kpyri-pc	K	3	VAKVTGGAASK	1	P42766	60S ribosomal protein L35	35	SQLRVAkVTGGAA
Kpyri-pc	K	10	VLTVINQTQKENLR	3	P42766	60S ribosomal protein L35	66	VINQTQkENLRKF
Kpyri-pc	K	12	VYVGNLGTGAGKGELER	1	Q16629	Serine/arginine-rich splicing factor 7	24	LGTGAGkGELERA
Kpyri-pc	D	1	DTGKTPVEPEVAIHR	5	P60866	40S ribosomal protein S20	5	MAFKdTGKTPV
Kpyri-pc	K	4	MAFKDTGKTPVEPEVAIHR	1	P60866	40S ribosomal protein S20	4	MAFkDTGKTP
Kpyri-pc	K	8	AFLIEEQKIVVK	3	P49207	60S ribosomal protein L34	101	FLIEEQkIVVKVL
Kpyri-pc	K	3	VLKAQAQSQK	3	P49207	60S ribosomal protein L34	108	IVVKVLkAQAQSQ
Kpyri-pc	K	15	DGDFENPVPYTGAVKVGAIQR	1	P30040	Endoplasmic reticulum resident protein 29	137	PYTGAVkVGAIQR
Kpyri-pc	K	4	IMGKILDQGEDFPASEMTR	2	P30040	Endoplasmic reticulum resident protein 29	208	YLKIMGkILDQGE
Kpyri-pc	S	3	MPSATSHSGSGSK	1	Q14444	Caprin-1	3	MPsATSHSG
Kpyri-pc	K	7	LASYLDKVR	1	P08727	Keratin, type I cytoskeletal 19	97	LASYLDkVRALEA
Kpyri-pc	K	17	SLLEGQEDHYNNLSASK	1	P08727	Keratin, type I cytoskeletal 19	398	NNLSASkVL
Kpyri-pc	K	3	TIKAQIWDTAGQER	3	P62491	Ras-related protein Rab-11A	61	VDGKTIkAQIWDT
Kpyri-pc	K	11	VVLIGDSGVGKSNLLSR	2	P62491	Ras-related protein Rab-11A	24	GDSGVGkSNLLSR
Kpyri-pc	K	7	GVVVLAKSYNEQR	3	P52895	Aldo-keto reductase family 1 member C2	270	GVVVLAkSYNEQR
Kpyri-pc	D	10	IADGSVKREDIFYTSK	1	P52895	Aldo-keto reductase family 1 member C2	78	GSVKREdIFYTSK
Kpyri-pc	S	1	SKALEAVK	1	P52895	Aldo-keto reductase family 1 member C2	32	PAEVPKsKALEAV
Kpyri-pc	K	10	MASASGAMAKHEQILVLDPPTDLK	1	Q9P0L0	Vesicle-associated membrane protein-associated protein A	10	ASGAMAkHEQILV
Kpyri-pc	K	2	VKTTAPR	1	Q9P0L0	Vesicle-associated membrane protein-associated protein A	52	KVCFKVkTTAPRR
Kpyri-pc	K	13	DADVQNFVSFISKDSIQK	1	P42126	Enoyl-CoA delta isomerase 1, mitochondrial	283	FVSFISkDSIQKS
Kpyri-pc	Q	2	KQLPDSNEIVEK	1	P35354	Prostaglandin G/H synthase 2	156	GVKGKKqLPDSNE
Kpyri-pc	K	8	NVPPAVQKVSQASIDQSR	1	P35354	Prostaglandin G/H synthase 2	432	VPPAVQkVSQASI
Kpyri-pc	K	13	SGLDDINPTVLLKER	1	P35354	Prostaglandin G/H synthase 2	598	NPTVLLkERSTEL
Kpyri-pc	K	1	KFADGEVVR	1	Q14739	Delta(14)-sterol reductase LBR	5	MPSRkFADGEV
Kpyri-pc	K	10	MATFVELSTKAK	3	O60218	Aldo-keto reductase family 1 member B10	10	FVELSTkAKMPIV
Kpyri-pc	K	10	MPIVGLGTWKSPLGK	1	O60218	Aldo-keto reductase family 1 member B10	22	VGLGTWkSPLGKV
Kpyri-pc	K	7	NVIVIPKSVTPAR	2	O60218	Aldo-keto reductase family 1 member B10	263	NVIVIPkSVTPAR
Kpyri-pc	D	4	SGDDLFPKDDKGNAIGGK	1	O60218	Aldo-keto reductase family 1 member B10	121	GFKSGDdLFPKDD
Kpyri-pc	K	1	KIGLETVGVK	2	Q16881	Thioredoxin reductase 1, cytoplasmic	449	RDACTRkIGLETV
Kpyri-pc	K	20	SYDYDLIIIGGGSGGLAAAKEAAQYGKK	1	Q16881	Thioredoxin reductase 1, cytoplasmic	179	GGLAAAkEAAQYG
Kpyri-pc	S	6	CKITPSARKPLCNR	1	E9PIF3	Nuclear pore complex-interacting protein family member A2	225	RCKITPsARKPLC
Kpyri-pc	K	1	KGLTPSQIGVILR	5	P62277	40S ribosomal protein S13	43	IYKLAKkGLTPSQ
Kpyri-pc	K	7	LTSDDVKEQIYK	2	P62277	40S ribosomal protein S13	34	LTSDDVkEQIYKL
Kpyri-pc	K	7	SVPTWLKLTSDDVKEQIYK	1	P62277	40S ribosomal protein S13	27	SVPTWLkLTSDDV
Kpyri-pc	R	11	ALEAVFGKYGR	1	P38159	RNA-binding motif protein, X chromosome	33	VFGKYGrIVEVLL
Kpyri-pc	K	3	AIKVEQATKPSFESGR	1	P38159	RNA-binding motif protein, X chromosome	80	LDGKAIkVEQATK
Kpyri-pc	D	1	DMNGKSLDGK	1	P38159	RNA-binding motif protein, X chromosome	68	AKDAARdMNGKSL
Kpyri-pc	D	1	DYGHSSSRDDYPSR	2	P38159	RNA-binding motif protein, X chromosome	245	RDYTYRdYGHSSS
Kpyri-pc	K	9	MVEADRPGKLFIGGLNTETNEK	2	P38159	RNA-binding motif protein, X chromosome	9	EADRPGkLFIGGL
Kpyri-pc	K	6	AMELLKVSK	5	Q9Y3U8	60S ribosomal protein L36	62	RAMELLkVSKDKR
Kpyri-pc	K	15	IEDLSQQAQLAAAEKFK	1	Q13765	Nascent polypeptide-associated complex subunit alpha	142	QLAAAEkFKVQGE
Kpyri-pc	K	2	IKLQIWDTAGQER	1	P61106	Ras-related protein Rab-14	61	VSGQKIkLQIWDT
Kpyri-pc	K	14	TGENVEDAFLEAAKK	1	P61106	Ras-related protein Rab-14	170	AFLEAAkKIYQNI
Kpyri-pc	K	11	VSGSQIVDIDKR	4	P60520	Gamma-aminobutyric acid receptor-associated protein-like 2	46	QIVDIDkRKYLVP
Kpyri-pc	K	4	GIVKDIIHDPGR	4	P62917	60S ribosomal protein L8	46	YIKGIVkDIIHDP
Kpyri-pc	T	2	GTKTVQEKEN	1	P62917	60S ribosomal protein L8	249	TGRLRGtKTVQEK
Kpyri-pc	K	1	KVGLIAAR	1	P62917	60S ribosomal protein L8	234	DAPAGRkVGLIAA
Kpyri-pc	K	1	KVISSANR	1	P62917	60S ribosomal protein L8	156	LPSGSKkVISSAN
Kpyri-pc	K	5	TVQEKEN	1	P62917	60S ribosomal protein L8	255	TKTVQEkEN
Kpyri-pc	K	2	VKLPSGSK	2	P62917	60S ribosomal protein L8	149	TKKTRVkLPSGSK
Kpyri-pc	K	1	KIFEYETQR	1	P50402	Emerin	37	RRLYEKkIFEYET
Kpyri-pc	K	3	NAKISSLLEEQFQQGK	1	P62241	40S ribosomal protein S8	157	ERKKNAkISSLLE
Kpyri-pc	W	4	AKNWVKELQR	2	P51148	Ras-related protein Rab-5C	115	FARAKNwVKELQR
Kpyri-pc	R	21	QASPNIVIALAGNKADLASKR	1	P51148	Ras-related protein Rab-5C	142	ADLASKrAVEFQE
Kpyri-pc	K	2	VKEIGSTMSGR	2	O00422	Histone deacetylase complex subunit SAP18	104	RPGYRVkEIGSTM
Kpyri-pc	K	11	VFEFGGPEVLKLR	1	Q08257	Quinone oxidoreductase	23	GGPEVLkLRSDIA
Kpyri-pc	K	4	MAGKQAVSASGK	1	P14927	Cytochrome b-c1 complex subunit 7	4	MAGkQAVSAS
Kpyri-pc	D	2	IDDSKEAMER	1	Q13595	Transformer-2 protein homolog alpha	171	VYFERIdDSKEAM
Kpyri-pc	K	1	KLDLSDTK	2	Q96NR8	Retinol dehydrogenase 12	96	SQVLVRkLDLSDT
Kpyri-pc	K	13	GAAVNLTLVTPEKAIK	1	Q9H1K4	Mitochondrial glutamate carrier 2	79	TLVTPEkAIKLAA
Kpyri-pc	E	2	KELQAAGKSPEDLER	1	P06744	Glucose-6-phosphate isomerase	448	TEEARKeLQAAGK
Kpyri-pc	K	1	KIEPELDGSAQVTSHDASTNGLINFIK	1	P06744	Glucose-6-phosphate isomerase	524	GKQLAKkIEPELD
Kpyri-pc	S	2	LSKEEVER	2	P17066	Heat shock 70 kDa protein 6	513	NDKGRLsKEEVER
Kpyri-pc	K	7	ITITNDKGR	1	P17066	Heat shock 70 kDa protein 6	509	ITITNDkGRLSKE
Kpyri-pc	K	9	MASSDIQVKELEKR	1	P16949	Stathmin	9	SSDIQVkELEKRA
Kpyri-pc	K	7	LASYLDKVR	1	P13645	Keratin, type I cytoskeletal 10	163	LASYLDkVRALEE
Kpyri-pc	K	2	LKYENEVALR	2	P13645	Keratin, type I cytoskeletal 10	237	ADDFRLkYENEVA
Kpyri-pc	K	10	AAFVSEQQQKLSR	1	P26006	Integrin alpha-3	638	VSEQQQkLSRLQY
Kpyri-pc	K	2	LKDGVLAYAR	1	Q14690	Protein RRP5 homolog	387	GATFRLkDGVLAY
Kpyri-pc	K	7	EHTALLKIEGVYAR	1	P18077	60S ribosomal protein L35a	29	EHTALLkIEGVYA
Kpyri-pc	K	6	SNLPAKAIGHR	1	P18077	60S ribosomal protein L35a	95	RSNLPAkAIGHRI
Kpyri-pc	K	5	VIWGKVTR	1	P18077	60S ribosomal protein L35a	73	TRVIWGkVTRAHG
Kpyri-pc	D	4	MAPDPVAAETAAQGPTPR	2	O60427	Acyl-CoA (8-3)-desaturase	4	MAPdPVAAET
Kpyri-pc	K	7	GVVVLAKSYNEQR	3	Q04828	Aldo-keto reductase family 1 member C1	270	GVVVLAkSYNEQR
Kpyri-pc	D	10	IADGSVKREDIFYTSK	1	Q04828	Aldo-keto reductase family 1 member C1	78	GSVKREdIFYTSK
Kpyri-pc	K	5	ATVPKTEIR	2	P62847	40S ribosomal protein S24	37	GKATVPkTEIREK
Kpyri-pc	K	1	KFMTNR	1	P62847	40S ribosomal protein S24	11	VTIRTRkFMTNRL
Kpyri-pc	K	7	THFGGGKTTGFGMIYDSLDYAK	1	P62847	40S ribosomal protein S24	68	THFGGGkTTGFGM
Kpyri-pc	K	12	VADWTGATYQDKR	3	O15371	Eukaryotic translation initiation factor 3 subunit D	53	GATYQDkRYTNKY
Kpyri-pc	K	6	LIFAGKQLEDGR	3	P62979	Ubiquitin-40S ribosomal protein S27a	48	RLIFAGkQLEDGR
Kpyri-pc	K	6	MQIFVKTLTGK	4	P62979	Ubiquitin-40S ribosomal protein S27a	6	MQIFVkTLTGKT
Kpyri-pc	Q	2	MQIFVKTLTGK	1	P62979	Ubiquitin-40S ribosomal protein S27a	2	MqIFVKTL
Kpyri-pc	K	5	TLTGKTITLEVEPSDTIENVK	2	P62979	Ubiquitin-40S ribosomal protein S27a	11	VKTLTGkTITLEV
Kpyri-pc	K	6	VDENGKISR	1	P62979	Ubiquitin-40S ribosomal protein S27a	113	KVDENGkISRLRR
Kpyri-pc	K	6	RVDQLKSDQSR	1	P04264	Keratin, type II cytoskeletal 1	246	RRVDQLkSDQSRL
Kpyri-pc	K	12	SLNNQFASFIDKVR	1	P04264	Keratin, type II cytoskeletal 1	197	FASFIDkVRFLEQ
Kpyri-pc	K	11	AAAAAAALQAKSDEK	2	P36578	60S ribosomal protein L4	364	AAALQAkSDEKAA
Kpyri-pc	K	1	KLDELYGTWR	4	P36578	60S ribosomal protein L4	259	TESAFRkLDELYG
Kpyri-pc	K	1	KPAEKKPTTEEK	1	P36578	60S ribosomal protein L4	412	KPAPEKkPAEKKP
Kpyri-pc	K	3	ILKSPEIQR	5	P36578	60S ribosomal protein L4	294	DLSRILkSPEIQR
Kpyri-pc	T	1	TKEAVLLLK	1	P36578	60S ribosomal protein L4	164	VEGYKKtKEAVLL
Kpyri-pc	Q	1	QFVKDSIR	1	P60059	Protein transport protein Sec61 subunit gamma	13	FVEPSRqFVKDSI
Kpyri-pc	Q	2	GQHTKTTGR	2	P62269	40S ribosomal protein S18	134	GLRVRGqHTKTTG
Kpyri-pc	K	1	KADIDLTK	4	P62269	40S ribosomal protein S18	47	AHVVLRkADIDLT
Kpyri-pc	K	1	KIAFAITAIK	2	P62269	40S ribosomal protein S18	25	NIDGRRkIAFAIT
Kpyri-pc	E	7	MSLVIPEKFQHILR	1	P62269	40S ribosomal protein S18	7	MSLVIPeKFQHIL
Kpyri-pc	Q	3	AIQKGNMEVAR	1	Q7LBR1	Charged multivesicular body protein 1b	41	KIKKAIqKGNMEV
Kpyri-pc	K	4	FAAKELSR	1	Q7LBR1	Charged multivesicular body protein 1b	16	NLKFAAkELSRSA
Kpyri-pc	K	11	ALAAGGYDVEKNNSR	4	P16401	Histone H1.5	78	GGYDVEkNNSRIK
Kpyri-pc	K	6	AVAASKER	1	P16401	Histone H1.5	55	KAVAASkERNGLS
Kpyri-pc	K	9	GTGASGSFKLNK	3	P16401	Histone H1.5	109	GASGSFkLNKKAA
Kpyri-pc	K	1	KALAAGGYDVEKNNSR	3	P16401	Histone H1.5	67	SLAALKkALAAGG
Kpyri-pc	K	4	LGLKSLVSK	1	P16401	Histone H1.5	88	RIKLGLkSLVSKG
Kpyri-pc	S	1	SLVSKGTLVQTK	2	P16401	Histone H1.5	89	IKLGLKsLVSKGT
Kpyri-pc	Q	3	FAQKIGGSER	1	P21291	Cysteine and glycine-rich protein 1	111	NASKFAqKIGGSE
Kpyri-pc	D	8	FKKYEEIDNAPEER	2	P49411	Elongation factor Tu, mitochondrial	96	KKYEEIdNAPEER
Kpyri-pc	Y	2	KYEEIDNAPEER	1	P49411	Elongation factor Tu, mitochondrial	92	GAKFKKyEEIDNA
Kpyri-pc	K	9	ILAEGGGAKFK	1	P49411	Elongation factor Tu, mitochondrial	88	AEGGGAkFKKYEE
Kpyri-pc	K	12	CAVVDVPFGGAKAGVK	1	P00367	Glutamate dehydrogenase 1, mitochondrial	183	VPFGGAkAGVKIN
Kpyri-pc	K	16	IIAEGANGPTTPEADKIFLER	3	P00367	Glutamate dehydrogenase 1, mitochondrial	415	TTPEADkIFLERN
Kpyri-pc	K	4	QLTKSNAPR	1	P00367	Glutamate dehydrogenase 1, mitochondrial	390	SEKQLTkSNAPRV
Kpyri-pc	T	1	TAMKYNLGLDLR	1	P00367	Glutamate dehydrogenase 1, mitochondrial	524	ARQIMRtAMKYNL
Kpyri-pc	T	3	GPTEADELMKR	1	P11413	Glucose-6-phosphate 1-dehydrogenase	490	YGSRGPtEADELM
Kpyri-pc	K	1	KPGMFFNPEESELDLTYGNR	1	P11413	Glucose-6-phosphate 1-dehydrogenase	408	TKMMTKkPGMFFN
Kpyri-pc	K	8	KQSEPFFKATPEEK	1	P11413	Glucose-6-phosphate 1-dehydrogenase	89	QSEPFFkATPEEK
Kpyri-pc	K	5	YKNVKLPDAYER	1	P11413	Glucose-6-phosphate 1-dehydrogenase	432	NRYKNVkLPDAYE
Kpyri-pc	K	5	TLNNKFASFIDK	2	P02538	Keratin, type II cytoskeletal 6A	173	IKTLNNkFASFID
Kpyri-pc	K	12	TLNNKFASFIDKVR	3	P02538	Keratin, type II cytoskeletal 6A	180	FASFIDkVRFLEQ
Kpyri-pc	K	2	LKPLEVELR	1	P49755	Transmembrane emp24 domain-containing protein 10	145	AKVEKLkPLEVEL
Kpyri-pc	K	7	NYEEIAKVEK	1	P49755	Transmembrane emp24 domain-containing protein 10	140	NYEEIAkVEKLKP
Kpyri-pc	K	4	SHLKITDSAGHILYSKEDATK	1	P49755	Transmembrane emp24 domain-containing protein 10	75	GLRSHLkITDSAG
Kpyri-pc	K	10	ISNIPDEYFKR	1	P51884	Lumican	226	IPDEYFkRFNALQ
Kpyri-pc	K	9	MANNDAVLKR	1	Q12904	Aminoacyl tRNA synthase complex-interacting multifunctional protein 1	9	NNDAVLkRLEQKG
Kpyri-pc	K	1	KIDFLTK	1	Q99471	Prefoldin subunit 5	106	KDFFKRkIDFLTK
Kpyri-pc	K	1	KVVQQLR	1	P63218	Guanine nucleotide-binding protein G(I)/G(S)/G(O) subunit gamma-5	12	SVAAMKkVVQQLR
Kpyri-pc	K	11	MSGSSSVAAMKK	2	P63218	Guanine nucleotide-binding protein G(I)/G(S)/G(O) subunit gamma-5	11	SSVAAMkKVVQQL
Kpyri-pc	K	10	MALSDADVQKQIK	1	P36543	V-type proton ATPase subunit E 1	10	SDADVQkQIKHMM
Kpyri-pc	S	3	AASGFNAMEDAQTLRK	1	P09525	Annexin A4	12	GTVKAAsGFNAME
Kpyri-pc	K	3	AMKGLGTDEDAIISVLAYR	2	P09525	Annexin A4	28	TLRKAMkGLGTDE
Kpyri-pc	K	5	GGTVKAASGFNAMEDAQTLR	1	P09525	Annexin A4	9	TKGGTVkAASGFN
Kpyri-pc	Q	3	ISQKDIEQSIK	1	P09525	Annexin A4	217	EYKRISqKDIEQS
Kpyri-pc	N	1	NKSAYFAEK	1	P09525	Annexin A4	245	IVKCMRnKSAYFA
Kpyri-pc	S	1	SMKGLGTDDNTLIR	3	P09525	Annexin A4	257	AEKLYKsMKGLGT
Kpyri-pc	T	1	TAYKSTIGR	1	P09525	Annexin A4	54	QRQEIRtAYKSTI
Kpyri-pc	K	1	KKETITESAGR	1	Q9UM00	Calcium load-activated calcium channel	104	SKKLEKkKETITE
Kpyri-pc	K	4	IMLKNVEDFTGPR	9	P61009	Signal peptidase complex subunit 3	49	VSRIMLkNVEDFT
Kpyri-pc	K	1	KVFANPEDCVAFGKGENAK	2	P10620	Microsomal glutathione S-transferase 1	42	FYRLTRkVFANPE
Kpyri-pc	K	5	VGIPKETPALTINR	1	P42765	3-ketoacyl-CoA thiolase, mitochondrial	81	LRVGIPkETPALT
Kpyri-pc	R	8	LMVAKEAR	1	P49458	Signal recognition particle 9 kDa protein	79	MVAKEArNVTMET
Kpyri-pc	Q	3	MPQYQTWEEFSR	2	P49458	Signal recognition particle 9 kDa protein	3	MPqYQTWEE
Kpyri-pc	K	1	KGEKDIPGLTDTTVPR	2	P62753	40S ribosomal protein S6	116	NLVIVKkGEKDIP
Kpyri-pc	K	1	KLFNLSKEDDVR	2	P62753	40S ribosomal protein S6	143	RASRIRkLFNLSK
Kpyri-pc	S	5	LFNLSKEDDVR	1	P62753	40S ribosomal protein S6	148	RKLFNLsKEDDVR
Kpyri-pc	K	15	MATEVAADALGEEWKGYVVR	2	P62753	40S ribosomal protein S6	46	ALGEEWkGYVVRI
Kpyri-pc	N	1	NKEEAAEYAK	1	P62753	40S ribosomal protein S6	202	KQRTKKnKEEAAE
Kpyri-pc	K	10	NKEEAAEYAKLLAK	2	P62753	40S ribosomal protein S6	211	EAAEYAkLLAKRM
Kpyri-pc	Q	1	QGVLTHGR	1	P62753	40S ribosomal protein S6	65	QGFPMKqGVLTHG
Kpyri-pc	Q	1	QANKEYLLGSTAEEK	1	O43324	Eukaryotic translation elongation factor 1 epsilon-1	54	AAHLVKqANKEYL
Kpyri-pc	T	4	GVFTKELPSGK	1	P30041	Peroxiredoxin-6	208	FPKGVFtKELPSG
Kpyri-pc	K	5	AAAGKAELELELGR	2	Q15149	Plectin	2078	EKAAAGkAELELE
Kpyri-pc	K	10	AQAEVEGLGKGVAR	3	Q15149	Plectin	1175	EVEGLGkGVARLS
Kpyri-pc	K	2	GKAEEQAVR	1	Q15149	Plectin	1815	EARRRGkAEEQAV
Kpyri-pc	K	1	KAALEEVER	2	Q15149	Plectin	2142	EAARQRkAALEEV
Kpyri-pc	K	1	KASDSELER	1	Q15149	Plectin	2037	RLAQLRkASDSEL
Kpyri-pc	K	1	KESYSALMR	1	Q15149	Plectin	792	TNMTAKkESYSAL
Kpyri-pc	K	1	KGLLSAEVAR	4	Q15149	Plectin	3849	IYQALKkGLLSAE
Kpyri-pc	K	1	KGLVGPELHDR	1	Q15149	Plectin	3887	VDEAVRkGLVGPE
Kpyri-pc	Q	2	KQITMEELVR	1	Q15149	Plectin	4028	FRGLRKqITMEEL
Kpyri-pc	K	10	LAEVEAALEKQR	1	Q15149	Plectin	1508	VEAALEkQRQLAE
Kpyri-pc	K	2	LKAEATEAAR	1	Q15149	Plectin	2350	EELQRLkAEATEA
Kpyri-pc	K	2	LKQSAEEQAQAR	1	Q15149	Plectin	2255	EEAERLkQSAEEQ
Kpyri-pc	K	2	QKAQVEQELTTLR	1	Q15149	Plectin	2318	EQTLRQkAQVEQE
Kpyri-pc	K	10	QSSEAEIQAKAR	2	Q15149	Plectin	1573	EAEIQAkARQAEA
Kpyri-pc	E	4	VLAEKLAAIGEATR	1	Q15149	Plectin	1974	AERVLAeKLAAIG
Kpyri-pc	K	3	VQKSLAAEEEAAR	1	Q15149	Plectin	2129	AEERVQkSLAAEE
Kpyri-pc	K	1	KEYIER	1	Q9P2P5	E3 ubiquitin-protein ligase HECW2	1403	VTEKNKkEYIERM
Kpyri-pc	K	8	AEGAGDAK	2	P05204	Non-histone chromosomal protein HMG-17	90	EGAGDAk
Kpyri-pc	K	1	KGLDPYNVLAPK	3	P10606	Cytochrome c oxidase subunit 5B, mitochondrial	57	IMLAAKkGLDPYN
Kpyri-pc	K	5	GAFGKPQGTVAR	1	P27635	60S ribosomal protein L10	121	MRGAFGkPQGTVA
Kpyri-pc	S	1	SCGKDGFHIR	1	P27635	60S ribosomal protein L10	79	NKYMVKsCGKDGF
Kpyri-pc	K	6	FSAYIKNSRPEANEALER	2	Q9Y696	Chloride intracellular channel protein 4	130	KFSAYIkNSRPEA
Kpyri-pc	S	2	KSEAPSGESR	1	B5ME19	Eukaryotic translation initiation factor 3 subunit C-like protein	201	TFLKKKsEAPSGE
Kpyri-pc	T	3	AVTKYTSSK	1	P33778	Histone H2B type 1-B	120	EGTKAVtKYTSSK
Kpyri-pc	E	2	KESYSIYVYK	1	P33778	Histone H2B type 1-B	36	RKRSRKeSYSIYV
Kpyri-pc	K	9	LLLPGELAKHAVSEGTK	2	P33778	Histone H2B type 1-B	109	LPGELAkHAVSEG
Kpyri-pc	E	3	MPEPSKSAPAPK	3	P33778	Histone H2B type 1-B	3	MPePSKSAP
Kpyri-pc	K	11	QVHPDTGISSK	2	P33778	Histone H2B type 1-B	58	DTGISSkAMGIMN
Kpyri-pc	K	6	SAPAPKKGSK	1	P33778	Histone H2B type 1-B	12	KSAPAPkKGSKKA
Kpyri-pc	K	1	KPTLDKPSPETFVK	1	Q53GQ0	Very-long-chain 3-oxoacyl-CoA reductase	244	KLAKIRkPTLDKP
Kpyri-pc	S	1	SAIKTVGLQSR	1	Q53GQ0	Very-long-chain 3-oxoacyl-CoA reductase	258	PETFVKsAIKTVG
Kpyri-pc	Q	3	KFQILDFTSPK	1	Q9BYD6	39S ribosomal protein L1, mitochondrial	110	HLLKKFqILDFTS
Kpyri-pc	K	1	KIGDTSVSYK	1	P20700	Lamin-B1	474	GWEMIRkIGDTSV
Kpyri-pc	K	1	KLLEGEEER	3	P20700	Lamin-B1	379	EISAYRkLLEGEE
Kpyri-pc	K	9	IGDTSVSYKYTSR	2	P20700	Lamin-B1	483	DTSVSYkYTSRYV
Kpyri-pc	K	3	LYKEELEQTYHAK	1	P20700	Lamin-B1	261	AQVRLYkEELEQT
Kpyri-pc	Q	14	VQNMALYADVGGKQFPVTR	1	P51571	Translocon-associated protein subunit delta	74	ADVGGKqFPVTRG
Kpyri-pc	E	2	KEAPPMEKPEVVK	3	P62841	40S ribosomal protein S15	66	LRKAKKeAPPMEK
Kpyri-pc	K	4	AADKLIQNLDANHDGR	1	Q96FQ6	Protein S100-A16	61	NRKAADkLIQNLD
Kpyri-pc	K	7	MAGIAAKLAK	3	P17655	Calpain-2 catalytic subunit	7	MAGIAAkLAKDRE
Kpyri-pc	T	1	TPKIQVYSR	1	P61769	Beta-2-microglobulin	24	LEAIQRtPKIQVY
Kpyri-pc	K	1	KVHPAVVIR	2	P62829	60S ribosomal protein L23	75	KPELRKkVHPAVV
Kpyri-pc	K	4	AAGKLKAEGSEIR	4	P07237	Protein disulfide-isomerase	69	YAKAAGkLKAEGS
Kpyri-pc	K	3	LAKVDATEESDLAQQYGVR	2	P07237	Protein disulfide-isomerase	81	SEIRLAkVDATEE
Kpyri-pc	K	2	LKAEGSEIR	3	P07237	Protein disulfide-isomerase	71	KAAGKLkAEGSEI
Kpyri-pc	K	12	MDSTANEVEAVKVHSFPTLK	1	P07237	Protein disulfide-isomerase	436	NEVEAVkVHSFPT
Kpyri-pc	K	8	SVSDYDGKLSNFK	1	P07237	Protein disulfide-isomerase	271	VSDYDGkLSNFKT
Kpyri-pc	Q	1	QAFGEKITMTIR	1	O00560	Syntenin-1	180	AHKVLKqAFGEKI
Kpyri-pc	K	7	AQFLVEKAKQEQR	2	Q99623	Prohibitin-2	216	AQFLVEkAKQEQR
Kpyri-pc	K	6	MAQNLKDLAGRLPAGPR	3	Q99623	Prohibitin-2	6	MAQNLkDLAGRL
Kpyri-pc	K	6	FEIPIKVR	2	O60488	Long-chain-fatty-acid--CoA ligase 4	670	RFEIPIkVRLSPE
Kpyri-pc	K	6	FGIAAKYQLDPTASISAK	1	P45880	Voltage-dependent anion-selective channel protein 2	235	RFGIAAkYQLDPT
Kpyri-pc	K	13	LTFDTTFSPNTGKK	1	P45880	Voltage-dependent anion-selective channel protein 2	120	FSPNTGkKSGKIK
Kpyri-pc	K	2	LKDIVSLVPR	1	O95573	Long-chain-fatty-acid--CoA ligase 3	222	LLQTKLkDIVSLV
Kpyri-pc	K	5	AIQNKDR	1	Q8NC51	Plasminogen activator inhibitor 1 RNA-binding protein	299	WKAIQNkDRAKVE
Kpyri-pc	K	13	EAGGGGVGGPGAKSAAQAAAQTNSNAAGK	1	Q8NC51	Plasminogen activator inhibitor 1 RNA-binding protein	52	VGGPGAkSAAQAA
Kpyri-pc	K	1	KPNEGADGQWK	1	Q8NC51	Plasminogen activator inhibitor 1 RNA-binding protein	310	VEFNIRkPNEGAD
Kpyri-pc	T	2	KTSSLDPNDQVAMGR	1	Q9NY61	Protein AATF	476	ELIERKtSSLDPN
Kpyri-pc	K	2	IKAVEGQTR	1	Q15599	Na(+)/H(+) exchange regulatory cofactor NHE-RF2	77	QVVQRIkAVEGQT
Kpyri-pc	K	4	MSSKTASTNNIAQAR	1	Q9UBI6	Guanine nucleotide-binding protein G(I)/G(S)/G(O) subunit gamma-12	4	MSSkTASTNN
Kpyri-pc	K	9	ANTFVAELKGLDPAR	1	P40926	Malate dehydrogenase, mitochondrial	185	TFVAELkGLDPAR
Kpyri-pc	S	2	ASIKKGEDFVK	1	P40926	Malate dehydrogenase, mitochondrial	326	IPELKAsIKKGED
Kpyri-pc	E	3	GIEKNLGIGK	2	P40926	Malate dehydrogenase, mitochondrial	300	LGKKGIeKNLGIG
Kpyri-pc	K	1	KGEDFVK	1	P40926	Malate dehydrogenase, mitochondrial	329	LKASIKkGEDFVK
Kpyri-pc	K	10	IQEAGTEVVKAK	2	P40926	Malate dehydrogenase, mitochondrial	239	AGTEVVkAKAGAG
Kpyri-pc	K	6	NLGIGKVSSFEEK	1	P40926	Malate dehydrogenase, mitochondrial	307	KNLGIGkVSSFEE
Kpyri-pc	K	7	LAADVGKAGAER	2	P05141	ADP/ATP translocase 2	147	LAADVGkAGAERE
Kpyri-pc	K	23	MTDAAVSFAKDFLAGGVAAAISKTAVAPIER	1	P05141	ADP/ATP translocase 2	23	VAAAISkTAVAPI
Kpyri-pc	K	2	VKLLLQVQHASK	3	P05141	ADP/ATP translocase 2	33	APIERVkLLLQVQ
Kpyri-pc	K	12	ADLINNLGTIAKSGTK	2	P08238	Heat shock protein HSP 90-beta	107	NLGTIAkSGTKAF
Kpyri-pc	K	12	ELISNASDALDKIR	3	P08238	Heat shock protein HSP 90-beta	53	ASDALDkIRYESL
Kpyri-pc	H	2	KHLEINPDHPIVETLR	1	P08238	Heat shock protein HSP 90-beta	625	YMMAKKhLEINPD
Kpyri-pc	E	4	QKAEADKNDK	1	P08238	Heat shock protein HSP 90-beta	643	TLRQKAeADKNDK
Kpyri-pc	E	3	AVELAANTK	1	P29401	Transketolase	459	ATEKAVeLAANTK
Kpyri-pc	K	1	KILATPPQEDAPSVDIANIR	2	P29401	Transketolase	283	QIQSKKkILATPP
Kpyri-pc	K	1	KLILDSAR	1	P29401	Transketolase	543	IKPLDRkLILDSA
Kpyri-pc	K	3	SGKPAELLK	1	P29401	Transketolase	597	RVPRSGkPAELLK
Kpyri-pc	K	18	SVPTSTVFYPSDGVATEKAVELAANTK	1	P29401	Transketolase	456	DGVATEkAVELAA
Kpyri-pc	K	26	TSRPENAIIYNNNEDFQVGQAKVVLK	1	P29401	Transketolase	497	QAKVVLkSKDDQV
Kpyri-pc	K	8	VLDPFTIKPLDR	4	P29401	Transketolase	538	LDPFTIkPLDRKL
Kpyri-pc	Y	1	YFDKASYR	2	P29401	Transketolase	141	MAYTGKyFDKASY
Kpyri-pc	S	1	SKPVFSESLSD	1	O60220	Mitochondrial import inner membrane translocase subunit Tim8 A	87	LEQTQKsKPVFSE
Kpyri-pc	K	4	LQDKATVLTTER	2	Q9UMS4	Pre-mRNA-processing factor 19	179	IQKLQDkATVLTT
Kpyri-pc	T	2	LTKEVTAAR	1	Q9UMS4	Pre-mRNA-processing factor 19	121	RVIARLtKEVTAA
Kpyri-pc	K	7	ILDGGNKEN	1	P42830	C-X-C motif chemokine 5	112	ILDGGNkEN
Kpyri-pc	K	8	VEVVASLK	1	P42830	C-X-C motif chemokine 5	85	EVVASLkNGKEIC
Kpyri-pc	Q	3	VIQKILDGGNK	1	P42830	C-X-C motif chemokine 5	104	FLKKVIqKILDGG
Kpyri-pc	K	4	VIQKILDGGNKEN	4	P42830	C-X-C motif chemokine 5	105	LKKVIQkILDGGN
Kpyri-pc	K	10	EGQEDQGLTKDYGNSPLHR	1	P26599	Polypyrimidine tract-binding protein 1	428	EDQGLTkDYGNSP
Kpyri-pc	K	5	VSFSKSTI	1	P26599	Polypyrimidine tract-binding protein 1	528	LRVSFSkSTI
Kpyri-pc	K	2	AKEFTNVYIK	1	Q13310	Polyadenylate-binding protein 4	188	ELGAKAkEFTNVY
Kpyri-pc	K	1	KFEQLKQER	1	Q13310	Polyadenylate-binding protein 4	279	QAELKRkFEQLKQ
Kpyri-pc	N	1	NLDKSIDNK	1	Q13310	Polyadenylate-binding protein 4	105	GNVFIKnLDKSID
Kpyri-pc	T	3	AVTKYTSSK	1	P58876	Histone H2B type 1-D	120	EGTKAVtKYTSSK
Kpyri-pc	K	9	ESYSVYVYKVLK	1	P58876	Histone H2B type 1-D	44	YSVYVYkVLKQVH
Kpyri-pc	E	2	KESYSVYVYK	1	P58876	Histone H2B type 1-D	36	RKRSRKeSYSVYV
Kpyri-pc	K	9	LLLPGELAKHAVSEGTK	2	P58876	Histone H2B type 1-D	109	LPGELAkHAVSEG
Kpyri-pc	E	3	MPEPTKSAPAPK	3	P58876	Histone H2B type 1-D	3	MPePTKSAP
Kpyri-pc	K	6	MPEPTKSAPAPK	1	P58876	Histone H2B type 1-D	6	MPEPTkSAPAPK
Kpyri-pc	K	11	QVHPDTGISSK	2	P58876	Histone H2B type 1-D	58	DTGISSkAMGIMN
Kpyri-pc	K	6	SAPAPKKGSK	1	P58876	Histone H2B type 1-D	12	KSAPAPkKGSKKA
Kpyri-pc	K	19	QGAIVAVTGDGVNDSPALKK	1	P05023	Sodium/potassium-transporting ATPase subunit alpha-1	726	NDSPALkKADIGV
Kpyri-pc	K	3	GLKAELAER	1	Q9BUJ2	Heterogeneous nuclear ribonucleoprotein U-like protein 1	26	LDTRGLkAELAER
Kpyri-pc	K	2	KKVWLDPNETNEIANANSR	1	P84098	60S ribosomal protein L19	21	LRCGKKkVWLDPN
Kpyri-pc	K	1	KLLADQAEAR	2	P84098	60S ribosomal protein L19	153	ADKARKkLLADQA
Kpyri-pc	K	3	LIKDGLIIR	1	P84098	60S ribosomal protein L19	46	QIRKLIkDGLIIR
Kpyri-pc	Q	2	LQAKKEEIIK	1	P84098	60S ribosomal protein L19	178	RREERLqAKKEEI
Kpyri-pc	T	1	TLSKEEETKK	2	P84098	60S ribosomal protein L19	187	KEEIIKtLSKEEE
Kpyri-pc	K	1	KAEATGEKRPR	1	P52926	High mobility group protein HMGI-C	67	SKAAQKkAEATGE
Kpyri-pc	Q	2	KQQQEPTGEPSPK	1	P52926	High mobility group protein HMGI-C	35	RGRPRKqQQEPTG
Kpyri-pc	Y	4	MAEYDLTTR	2	P60228	Eukaryotic translation initiation factor 3 subunit E	4	MAEyDLTTRI
Kpyri-pc	K	6	SLEEEKAAVTEAVR	1	Q9NP81	Serine--tRNA ligase, mitochondrial	110	RSLEEEkAAVTEA
Kpyri-pc	S	2	MSKNTVSSAR	1	O15511	Actin-related protein 2/3 complex subunit 5	2	MsKNTVSS
Kpyri-pc	K	7	FLEQQNKLLETK	1	P78386	Keratin, type II cuticular Hb5	149	FLEQQNkLLETKW
Kpyri-pc	Q	2	AQYDELAR	1	P05783	Keratin, type I cytoskeletal 18	255	MADIRAqYDELAR
Kpyri-pc	K	19	GLQAQIASSGLTVEVDAPKSQDLAK	2	P05783	Keratin, type I cytoskeletal 18	241	VEVDAPkSQDLAK
Kpyri-pc	K	1	KVIDDTNITR	4	P05783	Keratin, type I cytoskeletal 18	187	DIHGLRkVIDDTN
Kpyri-pc	K	25	LLEDGEDFNLGDALDSSNSMQTIQKTTTR	2	P05783	Keratin, type I cytoskeletal 18	407	SMQTIQkTTTRRI
Kpyri-pc	D	3	IVDGKVVSETNDTK	3	P05783	Keratin, type I cytoskeletal 18	415	TTRRIVdGKVVSE
Kpyri-pc	K	7	NHEEEVKGLQAQIASSGLTVEVDAPK	2	P05783	Keratin, type I cytoskeletal 18	222	NHEEEVkGLQAQI
Kpyri-pc	K	3	NLKASLENSLR	1	P05783	Keratin, type I cytoskeletal 18	317	DSMRNLkASLENS
Kpyri-pc	K	12	QAQEYEALLNIKVK	2	P05783	Keratin, type I cytoskeletal 18	370	EALLNIkVKLEAE
Kpyri-pc	S	1	SLGSVQAPSYGARPVSSAASVYAGAGGSGSR	1	P05783	Keratin, type I cytoskeletal 18	15	FSTNYRsLGSVQA
Kpyri-pc	K	6	SQDLAKIMADIR	1	P05783	Keratin, type I cytoskeletal 18	247	KSQDLAkIMADIR
Kpyri-pc	S	1	STFSTNYR	1	P05783	Keratin, type I cytoskeletal 18	7	MSFTTRsTFSTNY
Kpyri-pc	K	2	VKLEAEIATYR	9	P05783	Keratin, type I cytoskeletal 18	372	LLNIKVkLEAEIA
Kpyri-pc	K	9	VVSETNDTK	5	P05783	Keratin, type I cytoskeletal 18	426	SETNDTkVLRH
Kpyri-pc	E	2	KENPLQFK	1	P35241	Radixin	73	QQDVKKeNPLQFK
Kpyri-pc	K	10	EAIEGTYIDKK	1	P62280	40S ribosomal protein S11	58	EGTYIDkKCPFTG
Kpyri-pc	K	5	FNVLKVTK	1	P62280	40S ribosomal protein S11	144	VRFNVLkVTKAAG
Kpyri-pc	K	8	VLLGETGKEKLPR	2	P62280	40S ribosomal protein S11	30	LLGETGkEKLPRY
Kpyri-pc	K	1	KGVAINMVTEEDKR	1	P60842	Eukaryotic initiation factor 4A-I	369	GGRFGRkGVAINM
Kpyri-pc	K	1	KVDWLTEK	1	P60842	Eukaryotic initiation factor 4A-I	284	FINTRRkVDWLTE
Kpyri-pc	K	1	KGINTLVTYDMVPEPK	4	P20674	Cytochrome c oxidase subunit 5A, mitochondrial	72	DAWELRkGINTLV
Kpyri-pc	K	1	KVPGVTAIELDEDTGTFR	1	P51114	Fragile X mental retardation syndrome-related protein 1	246	NIQQARkVPGVTA
Kpyri-pc	K	12	LGGSAVISLEGKPL	2	P23528	Cofilin-1	164	VISLEGkPL
Kpyri-pc	K	13	MASGVAVSDGVIKVFNDMK	2	P23528	Cofilin-1	13	VSDGVIkVFNDMK
Kpyri-pc	K	6	VFNDMKVR	1	P23528	Cofilin-1	19	KVFNDMkVRKSST
Kpyri-pc	K	11	YALYDATYETKESK	1	P23528	Cofilin-1	92	DATYETkESKKED
Kpyri-pc	K	12	ELISNASDALEKLR	1	Q12931	Heat shock protein 75 kDa, mitochondrial	126	ASDALEkLRHKLV
Kpyri-pc	K	1	KLLDIVAR	2	Q12931	Heat shock protein 75 kDa, mitochondrial	96	FQAETKkLLDIVA
Kpyri-pc	K	8	AHSIQIMKVEEIAASK	3	Q02543	60S ribosomal protein L18a	128	HSIQIMkVEEIAA
Kpyri-pc	K	2	MKASGTLR	1	Q02543	60S ribosomal protein L18a	2	MkASGTLR
Kpyri-pc	K	2	GKGGEIQPVSVK	1	P61604	10 kDa heat shock protein, mitochondrial	56	GSGSKGkGGEIQP
Kpyri-pc	K	7	AIASSLKSWNETLTSR	1	O75947	ATP synthase subunit d, mitochondrial	32	AIASSLkSWNETL
Kpyri-pc	K	5	ANVAKAGLVDDFEKK	1	O75947	ATP synthase subunit d, mitochondrial	63	YKANVAkAGLVDD
Kpyri-pc	K	10	MAAPVDLELKK	1	O60925	Prefoldin subunit 1	10	PVDLELkKAFTEL
Kpyri-pc	K	3	IAKFAFDYATK	1	O43837	Isocitrate dehydrogenase [NAD] subunit beta, mitochondrial	199	KSQRIAkFAFDYA
Kpyri-pc	K	1	KVTAQDVR	1	P26038	Moesin	64	WLKLNKkVTAQDV
Kpyri-pc	K	12	IQEVGEPSKEEKAVAK	1	Q99442	Translocation protein SEC62	22	EPSKEEkAVAKYL
Kpyri-pc	D	2	ADVKGGTLTQYEGK	1	Q16851	UTP--glucose-1-phosphate uridylyltransferase	289	TNKTRAdVKGGTL
Kpyri-pc	E	4	FLQEKGPSVDWGK	2	Q16851	UTP--glucose-1-phosphate uridylyltransferase	68	FHRFLQeKGPSVD
Kpyri-pc	K	3	INKESLLPVAK	1	Q16851	UTP--glucose-1-phosphate uridylyltransferase	198	RYPRINkESLLPV
Kpyri-pc	K	1	KFAYLGR	2	P40429	60S ribosomal protein L13a	134	RLKPTRkFAYLGR
Kpyri-pc	K	1	KIDKYTEVLK	1	P40429	60S ribosomal protein L13a	188	EKNVEKkIDKYTE
Kpyri-pc	K	7	LAAIVAKQVLLGR	2	P40429	60S ribosomal protein L13a	25	LAAIVAkQVLLGR
Kpyri-pc	K	8	MVVPAALKVVR	4	P40429	60S ribosomal protein L13a	125	VVPAALkVVRLKP
Kpyri-pc	K	12	VFDGIPPPYDKK	1	P40429	60S ribosomal protein L13a	115	PPPYDKkKRMVVP
Kpyri-pc	K	5	AEPAKIEAFR	1	P00558	Phosphoglycerate kinase 1	146	VKAEPAkIEAFRA
Kpyri-pc	K	8	ALMDEVVKATSR	1	P00558	Phosphoglycerate kinase 1	361	LMDEVVkATSRGC
Kpyri-pc	K	8	FHVEEEGKGKDASGNK	1	P00558	Phosphoglycerate kinase 1	131	HVEEEGkGKDASG
Kpyri-pc	K	1	KYAEAVTR	1	P00558	Phosphoglycerate kinase 1	323	GPESSKkYAEAVT
Kpyri-pc	N	4	VDFNVPMKNNQITNNQR	1	P00558	Phosphoglycerate kinase 1	26	VMRVDFnVPMKNN
Kpyri-pc	K	8	VDFNVPMKNNQITNNQR	2	P00558	Phosphoglycerate kinase 1	30	DFNVPMkNNQITN
Kpyri-pc	K	2	LKFLNDSEQVAR	1	Q9BVT8	Transmembrane and ubiquitin-like domain-containing protein 1	108	PLVLRLkFLNDSE
Kpyri-pc	K	13	GNPTVEVDLYTAKGLFR	1	P09104	Gamma-enolase	28	VDLYTAkGLFRAA
Kpyri-pc	K	7	EAVTTLKTVLDQQQTPSR	1	P42704	Leucine-rich PPR motif-containing protein, mitochondrial	1128	EAVTTLkTVLDQQ
Kpyri-pc	K	1	KIIETPGIR	1	P42704	Leucine-rich PPR motif-containing protein, mitochondrial	909	NYKEAKkIIETPG
Kpyri-pc	K	13	LTFDSSFSPNTGKK	1	P21796	Voltage-dependent anion-selective channel protein 1	109	FSPNTGkKNAKIK
Kpyri-pc	S	13	MAVPPTYADLGKSAR	2	P21796	Voltage-dependent anion-selective channel protein 1	13	YADLGKsARDVFT
Kpyri-pc	K	21	TKSENGLEFTSSGSANTETTKVTGSLETK	1	P21796	Voltage-dependent anion-selective channel protein 1	53	ANTETTkVTGSLE
Kpyri-pc	K	16	VNNSSLIGLGYTQTLKPGIK	3	P21796	Voltage-dependent anion-selective channel protein 1	252	GYTQTLkPGIKLT
Kpyri-pc	K	11	VTQSNFAVGYKTDEFQLHTNVNDGTEFGGSIYQK	1	P21796	Voltage-dependent anion-selective channel protein 1	174	NFAVGYkTDEFQL
Kpyri-pc	K	6	YIEIFKSSR	1	P31943	Heterogeneous nuclear ribonucleoprotein H	185	RYIEIFkSSRAEV
Kpyri-pc	K	9	ALAENSGVKANEVISK	1	P50990	T-complex protein 1 subunit theta	459	AENSGVkANEVIS
Kpyri-pc	N	2	KNGGLGHMNIALLSDLTK	3	P30048	Thioredoxin-dependent peroxide reductase, mitochondrial	150	INTPRKnGGLGHM
Kpyri-pc	K	8	EYTINIHKR	1	P62899	60S ribosomal protein L31	31	YTINIHkRIHGVG
Kpyri-pc	K	4	FAMKEMGTPDVR	6	P62899	60S ribosomal protein L31	55	IRKFAMkEMGTPD
Kpyri-pc	K	1	KFAMKEMGTPDVR	1	P62899	60S ribosomal protein L31	51	ALKEIRkFAMKEM
Kpyri-pc	K	6	FSAYIKNSNPALNDNLEK	2	O00299	Chloride intracellular channel protein 1	119	KFSAYIkNSNPAL
Kpyri-pc	K	1	KILIWSGR	1	Q96A26	Protein FAM162A	69	PTDWQKkILIWSG
Kpyri-pc	K	2	LKEEAAMK	2	Q96A26	Protein FAM162A	144	EKKARLkEEAAMK
Kpyri-pc	T	1	TVTELVTK	1	Q8IY81	pre-rRNA 2'-O-ribose RNA methyltransferase FTSJ3	226	VEVQAKtVTELVT
Kpyri-pc	K	8	ELPSFLGKR	2	P26447	Protein S100-A4	48	LPSFLGkRTDEAA
Kpyri-pc	K	3	APKISMPDIDLNLKGPK	1	Q09666	Neuroblast differentiation-associated protein AHNAK	2706	MNIKAPkISMPDI
Kpyri-pc	K	3	APKISMPDIDLNLKGPK	1	Q09666	Neuroblast differentiation-associated protein AHNAK	3090	MNIKAPkISMPDI
Kpyri-pc	K	3	APKISMPDIDLNLKGPK	1	Q09666	Neuroblast differentiation-associated protein AHNAK	3218	MNIKAPkISMPDL
Kpyri-pc	K	3	APKISMPDIDLNLKGPK	1	Q09666	Neuroblast differentiation-associated protein AHNAK	3542	MNIKAPkISMPDI
Kpyri-pc	K	3	APKISMPDIDLNLKGPK	1	Q09666	Neuroblast differentiation-associated protein AHNAK	3744	MHLKAPkISMPDI
Kpyri-pc	K	3	APKISMPDIDLNLKGPK	1	Q09666	Neuroblast differentiation-associated protein AHNAK	3872	MNIKAPkISMPDI
Kpyri-pc	K	3	APKISMPDIDLNLKGPK	1	Q09666	Neuroblast differentiation-associated protein AHNAK	4720	MSIKAPkISMPDI
Kpyri-pc	K	2	FKMPEMNIK	4	Q09666	Neuroblast differentiation-associated protein AHNAK	807	LKGPKFkMPEMNI
Kpyri-pc	K	2	FKMPEMNIK	4	Q09666	Neuroblast differentiation-associated protein AHNAK	935	LKGPKFkMPEMNI
Kpyri-pc	K	2	FKMPEMNIK	4	Q09666	Neuroblast differentiation-associated protein AHNAK	2696	LKGPKFkMPEMNI
Kpyri-pc	K	2	FKMPEMNIK	4	Q09666	Neuroblast differentiation-associated protein AHNAK	2952	LKGPKFkMPEMNI
Kpyri-pc	K	2	FKMPEMNIK	4	Q09666	Neuroblast differentiation-associated protein AHNAK	3080	LKGPKFkMPEMNI
Kpyri-pc	K	2	FKMPEMNIK	4	Q09666	Neuroblast differentiation-associated protein AHNAK	3208	LKGPKFkMPEMNI
Kpyri-pc	K	2	FKMPEMNIK	4	Q09666	Neuroblast differentiation-associated protein AHNAK	3660	LKGPKFkMPEMNI
Kpyri-pc	K	2	FKMPEMNIK	4	Q09666	Neuroblast differentiation-associated protein AHNAK	3862	LKGPKFkMPEMNI
Kpyri-pc	K	2	FKMPEMNIK	4	Q09666	Neuroblast differentiation-associated protein AHNAK	3990	LKGPKFkMPEMNI
Kpyri-pc	K	2	FKMPEMNIK	4	Q09666	Neuroblast differentiation-associated protein AHNAK	4246	LKGPKFkMPEMNI
Kpyri-pc	K	2	FKMPEMNIK	4	Q09666	Neuroblast differentiation-associated protein AHNAK	4374	LKGPKFkMPEMNI
Kpyri-pc	K	2	FKMPEMNIK	4	Q09666	Neuroblast differentiation-associated protein AHNAK	4448	LKGPKFkMPEMNI
Kpyri-pc	K	11	ISMPDLDLNLKGPK	2	Q09666	Neuroblast differentiation-associated protein AHNAK	2717	DIDLNLkGPKVKG
Kpyri-pc	K	11	ISMPDLDLNLKGPK	2	Q09666	Neuroblast differentiation-associated protein AHNAK	3101	DIDLNLkGPKVKG
Kpyri-pc	K	11	ISMPDLDLNLKGPK	2	Q09666	Neuroblast differentiation-associated protein AHNAK	3229	DLDLNLkGPKMKG
Kpyri-pc	K	11	ISMPDLDLNLKGPK	2	Q09666	Neuroblast differentiation-associated protein AHNAK	3553	DIDLNLkGPKVKG
Kpyri-pc	K	11	ISMPDLDLNLKGPK	2	Q09666	Neuroblast differentiation-associated protein AHNAK	3755	DIDLNLkGPKVKG
Kpyri-pc	K	11	ISMPDLDLNLKGPK	2	Q09666	Neuroblast differentiation-associated protein AHNAK	3883	DIDLNLkGPKVKG
Kpyri-pc	K	11	ISMPDLDLNLKGPK	2	Q09666	Neuroblast differentiation-associated protein AHNAK	4731	DIDLNLkGPKVKG
Kpyri-pc	K	11	ISMPDVDLHLKGPK	2	Q09666	Neuroblast differentiation-associated protein AHNAK	1205	DVDLHLkGPKVKG
Kpyri-pc	K	11	ISMPDVDLHLKGPK	2	Q09666	Neuroblast differentiation-associated protein AHNAK	1663	DVDLHLkGPKVKG
Kpyri-pc	K	11	ISMPDVDLHLKGPK	2	Q09666	Neuroblast differentiation-associated protein AHNAK	1865	DVDLHLkGPKVKG
Kpyri-pc	K	11	ISMPDVDLHLKGPK	2	Q09666	Neuroblast differentiation-associated protein AHNAK	1932	DVDLHLkGPKVKG
Kpyri-pc	K	11	ISMPDVDLHLKGPK	2	Q09666	Neuroblast differentiation-associated protein AHNAK	1999	DVDLHLkGPKVKG
Kpyri-pc	K	11	ISMPDVDLHLKGPK	2	Q09666	Neuroblast differentiation-associated protein AHNAK	2127	DVDLHLkGPKVKG
Kpyri-pc	K	11	ISMPEVDLNLKGPK	1	Q09666	Neuroblast differentiation-associated protein AHNAK	4139	EVDLNLkGPKMKG
Kpyri-pc	K	11	ISMPEVDLNLKGPK	1	Q09666	Neuroblast differentiation-associated protein AHNAK	4603	EVDLNLkGPKVKG
Kpyri-pc	K	1	KHLQDLSGR	1	P30533	Alpha-2-macroglobulin receptor-associated protein	340	LGYTVKkHLQDLS
Kpyri-pc	K	7	LNQLWEKAQR	1	P30533	Alpha-2-macroglobulin receptor-associated protein	65	LNQLWEkAQRLHL
Kpyri-pc	T	2	MTKGTSSFGK	1	P61927	60S ribosomal protein L37	2	MtKGTSSF
Kpyri-pc	E	2	KENPLQFK	1	P15311	Ezrin	73	AQEVRKeNPLQFK
Kpyri-pc	D	1	DAGTIAGLNVLR	2	P11142	Heat shock cognate 71 kDa protein	160	QRQATKdAGTIAG
Kpyri-pc	K	8	GTLDPVEKALR	1	P11142	Heat shock cognate 71 kDa protein	319	TLDPVEkALRDAK
Kpyri-pc	K	7	ITITNDKGR	1	P11142	Heat shock cognate 71 kDa protein	507	ITITNDkGRLSKE
Kpyri-pc	K	15	NQVAMNPTNTVFDAKR	8	P11142	Heat shock cognate 71 kDa protein	71	NTVFDAkRLIGRR
Kpyri-pc	K	6	VQVEYKGETK	1	P11142	Heat shock cognate 71 kDa protein	108	KVQVEYkGETKSF
Kpyri-pc	K	8	AELDAAEKLR	1	Q12797	Aspartyl/asparaginyl beta-hydroxylase	350	ELDAAEkLRKRGK
Kpyri-pc	K	14	LIRDEGLAVMDKAK	1	Q12797	Aspartyl/asparaginyl beta-hydroxylase	609	AVMDKAkGLFLPE
Kpyri-pc	K	3	NAKSSGNSSSSGSGSGSTSAGSSSPGAR	1	Q12797	Aspartyl/asparaginyl beta-hydroxylase	8	AQRKNAkSSGNSS
Kpyri-pc	S	1	SSGNSSSSGSGSGSTSAGSSSPGAR	1	Q12797	Aspartyl/asparaginyl beta-hydroxylase	9	QRKNAKsSGNSSS
Kpyri-pc	H	1	HVVPNEVVVQR	2	P06396	Gelsolin	178	VASGFKhVVPNEV
Kpyri-pc	K	2	LKATQVSK	1	P06396	Gelsolin	239	NRYERLkATQVSK
Kpyri-pc	K	5	VFIIKSYSEDDIHR	1	Q7Z739	YTH domain-containing family protein 3	422	GRVFIIkSYSEDD
Kpyri-pc	K	10	FLDGIYVSEKGTVQQADE	1	P32969	60S ribosomal protein L9	184	GIYVSEkGTVQQA
Kpyri-pc	K	1	KFLDGIYVSEK	2	P32969	60S ribosomal protein L9	174	KNKDIRkFLDGIY
Kpyri-pc	K	21	MKTILSNQTVDIPENVDITLKGR	1	P32969	60S ribosomal protein L9	21	NVDITLkGRTVIV
Kpyri-pc	K	6	NFLGEKYIR	1	P32969	60S ribosomal protein L9	121	RNFLGEkYIRRVR
Kpyri-pc	K	9	AEVDLQGIKAK	1	P27216	Annexin A13	284	VDLQGIkAKFQEK
Kpyri-pc	T	3	AVTKYTSAK	1	O60814	Histone H2B type 1-K	120	EGTKAVtKYTSAK
Kpyri-pc	K	9	ESYSVYVYKVLK	1	O60814	Histone H2B type 1-K	44	YSVYVYkVLKQVH
Kpyri-pc	E	2	KESYSVYVYK	1	O60814	Histone H2B type 1-K	36	RKRSRKeSYSVYV
Kpyri-pc	K	9	LLLPGELAKHAVSEGTK	2	O60814	Histone H2B type 1-K	109	LPGELAkHAVSEG
Kpyri-pc	K	6	MPEPAKSAPAPK	5	O60814	Histone H2B type 1-K	6	MPEPAkSAPAPK
Kpyri-pc	E	3	MPEPAKSAPAPK	8	O60814	Histone H2B type 1-K	3	MPePAKSAP
Kpyri-pc	K	11	QVHPDTGISSK	2	O60814	Histone H2B type 1-K	58	DTGISSkAMGIMN
Kpyri-pc	K	6	SAPAPKKGSK	1	O60814	Histone H2B type 1-K	12	KSAPAPkKGSKKA
Kpyri-pc	K	4	KLEKEEEEGISQESSEEEQ	2	P17096	High mobility group protein HMG-I/HMG-Y	92	RPKKLEkEEEEGI
Kpyri-pc	Q	2	KQPPVSPGTALVGSQKEPSEVPTPK	1	P17096	High mobility group protein HMG-I/HMG-Y	32	RGRPRKqPPVSPG
Kpyri-pc	K	7	MSESSSKSSQPLASK	2	P17096	High mobility group protein HMG-I/HMG-Y	7	MSESSSkSSQPLA
Kpyri-pc	S	5	MSESSSKSSQPLASKQEK	1	P17096	High mobility group protein HMG-I/HMG-Y	5	MSESsSKSSQP
Kpyri-pc	K	11	SSQPLASKQEKDGTEK	1	P17096	High mobility group protein HMG-I/HMG-Y	18	LASKQEkDGTEKR
Kpyri-pc	K	1	KPATSYVR	1	P46779	60S ribosomal protein L28	72	RRSGQRkPATSYV
Kpyri-pc	T	2	KTVGVEPAADGKGVVVVIK	2	P46779	60S ribosomal protein L28	48	GLIHRKtVGVEPA
Kpyri-pc	K	11	QTYSTEPNNLKAR	4	P46779	60S ribosomal protein L28	33	TEPNNLkARNSFR
Kpyri-pc	K	5	TTINKNAR	1	P46779	60S ribosomal protein L28	84	VRTTINkNARATL
Kpyri-pc	K	11	TVGVEPAADGKGVVVVIK	1	P46779	60S ribosomal protein L28	58	EPAADGkGVVVVI
Kpyri-pc	K	1	KVNNADDFPNLFR	1	Q13085	Acetyl-CoA carboxylase 1	323	GGKGIRkVNNADD
Kpyri-pc	K	4	AGGKILTFDQLALDSPK	1	Q07020	60S ribosomal protein L18	119	ILRAGGkILTFDQ
Kpyri-pc	K	11	TNSTFNQVVLKR	3	Q07020	60S ribosomal protein L18	49	FNQVVLkRLFMSR
Kpyri-pc	Y	1	YVECSALTQK	1	P60953	Cell division control protein 42 homolog	154	DLKAVKyVECSAL
Kpyri-pc	K	8	LYEQLSGK	1	P30086	Phosphatidylethanolamine-binding protein 1	187	YEQLSGk
Kpyri-pc	K	9	MTEADVNPKAYPLADAHLTK	1	P55769	NHP2-like protein 1	9	EADVNPkAYPLAD
Kpyri-pc	E	1	EKELEAR	1	O75955	Flotillin-1	276	QEIARReKELEAR
Kpyri-pc	K	1	KLEDGPK	1	P68104	Elongation factor 1-alpha 1	386	DRRSGKkLEDGPK
Kpyri-pc	K	8	QLIVGVNK	1	P68104	Elongation factor 1-alpha 1	154	LIVGVNkMDSTEP
Kpyri-pc	K	9	QTVAVGVIKAVDK	2	P68104	Elongation factor 1-alpha 1	439	VAVGVIkAVDKKA
Kpyri-pc	E	3	TIEKFEKEAAEMGK	1	P68104	Elongation factor 1-alpha 1	40	IDKRTIeKFEKEA
Kpyri-pc	K	4	TIEKFEKEAAEMGK	2	P68104	Elongation factor 1-alpha 1	41	DKRTIEkFEKEAA
Kpyri-pc	K	7	VETGVLKPGMVVTFAPVNVTTEVK	2	P68104	Elongation factor 1-alpha 1	273	VETGVLkPGMVVT
Kpyri-pc	K	1	KYDGYAR	3	Q12965	Unconventional myosin-Ie	694	EEMRERkYDGYAR
Kpyri-pc	K	1	KVHGSLAR	1	P62861	40S ribosomal protein S30	1	kVHGSLA
Kpyri-pc	K	9	MAEVEETLKR	1	Q8TF09	Dynein light chain roadblock-type 2	9	EVEETLkRIQSHK
Kpyri-pc	K	1	KLVIPSELGYGER	5	P26885	Peptidyl-prolyl cis-trans isomerase FKBP2	103	CEGEKRkLVIPSE
Kpyri-pc	K	11	DSYVGDEAQSK	2	P60709	Actin, cytoplasmic 1	61	GDEAQSkRGILTL
Kpyri-pc	K	11	EITALAPSTMK	5	P60709	Actin, cytoplasmic 1	326	LAPSTMkIKIIAP
Kpyri-pc	E	1	EITALAPSTMK	5	P60709	Actin, cytoplasmic 1	316	ADRMQKeITALAP
Kpyri-pc	K	11	HQGVMVGMGQKDSYVGDEAQSK	6	P60709	Actin, cytoplasmic 1	50	MVGMGQkDSYVGD
Kpyri-pc	D	2	KDLYANTVLSGGTTMYPGIADR	5	P60709	Actin, cytoplasmic 1	292	DVDIRKdLYANTV
Kpyri-pc	K	2	IKIIAPPER	10	P60709	Actin, cytoplasmic 1	328	PSTMKIkIIAPPE
Kpyri-pc	K	3	MQKEITALAPSTMK	5	P60709	Actin, cytoplasmic 1	315	IADRMQkEITALA
Kpyri-pc	S	1	SYELPDGQVITIGNER	1	P60709	Actin, cytoplasmic 1	239	SSSLEKsYELPDG
Kpyri-pc	K	18	VAPEEHPVLLTEAPLNPKANR	6	P60709	Actin, cytoplasmic 1	113	EAPLNPkANREKM
Kpyri-pc	K	1	KAEVEGKDLPEHAVLK	1	Q00839	Heterogeneous nuclear ribonucleoprotein U	620	KQRTQKkAEVEGK
Kpyri-pc	K	9	MSSSPVNVKK	1	Q00839	Heterogeneous nuclear ribonucleoprotein U	9	SSPVNVkKLKVSE
Kpyri-pc	D	4	QMADTGKLNTLLQR	2	Q00839	Heterogeneous nuclear ribonucleoprotein U	548	FKKQMAdTGKLNT
Kpyri-pc	K	2	LKDDEVAQLKK	1	P07195	L-lactate dehydrogenase B chain	310	VINQKLkDDEVAQ
Kpyri-pc	K	5	IVADKDYSVTANSK	1	P07195	L-lactate dehydrogenase B chain	82	PKIVADkDYSVTA
Kpyri-pc	K	1	KAYIEINR	1	Q14966	Zinc finger protein 638	943	ILSSHKkAYIEIN
Kpyri-pc	K	2	QKTGETSR	1	P53999	Activated RNA polymerase II transcriptional coactivator p15	41	KPVKKQkTGETSR
Kpyri-pc	T	2	ITKEAGSVSLR	1	Q13813	Spectrin alpha chain, non-erythrocytic 1	1056	DNQTRItKEAGSV
Kpyri-pc	K	6	FSNQYKATIGADFLTK	1	P51149	Ras-related protein Rab-7a	38	KFSNQYkATIGAD
Kpyri-pc	E	10	EGAAAAPPPEREAR	1	Q7Z2K6	Endoplasmic reticulum metallopeptidase 1	30	AAAPPPeREARAQ
Kpyri-pc	T	5	ELNITAAKEIEVGGGR	2	P62081	40S ribosomal protein S7	46	LRELNItAAKEIE
Kpyri-pc	K	8	ELNITAAKEIEVGGGRK	4	P62081	40S ribosomal protein S7	49	LNITAAkEIEVGG
Kpyri-pc	K	1	KLTGKDVNFEFPEFQL	1	P62081	40S ribosomal protein S7	179	FSGVYKkLTGKDV
Kpyri-pc	S	1	SFQKIQVR	1	P62081	40S ribosomal protein S7	71	PVPQLKsFQKIQV
Kpyri-pc	K	1	KGLYMANDLK	4	Q9Y2Q3	Glutathione S-transferase kappa 1	62	PGLLPRkGLYMAN
Kpyri-pc	K	3	GLKTVFDEAIR	1	P60763	Ras-related C3 botulinum toxin substrate 3	166	LTQRGLkTVFDEA
Kpyri-pc	K	1	KIQALQQQADEAEDRAQGLQR	1	P67936	Tropomyosin alpha-4 chain	13	LEAVKRkIQALQQ
Kpyri-pc	K	11	MAGLNSLEAVKR	2	P67936	Tropomyosin alpha-4 chain	11	NSLEAVkRKIQAL
Kpyri-pc	E	4	FVVEKAEQQKK	1	P35232	Prohibitin	201	RARFVVeKAEQQK
Kpyri-pc	K	1	KAAIISAEGDSK	1	P35232	Prohibitin	208	KAEQQKkAAIISA
Kpyri-pc	K	4	MAAKVFESIGK	2	P35232	Prohibitin	4	MAAkVFESIG
Kpyri-pc	K	12	VKDASPNQVAEKVASR	1	O43402	ER membrane protein complex subunit 8	110	PNQVAEkVASRIA
Kpyri-pc	T	1	TEDGKIYQR	1	P31040	Succinate dehydrogenase [ubiquinone] flavoprotein subunit, mitochondrial	163	GMPFSRtEDGKIY
Kpyri-pc	K	1	KLVESLPQEIK	1	P52815	39S ribosomal protein L12, mitochondrial	163	NLVQAKkLVESLP
Kpyri-pc	K	14	FGFPEGSVELYAEKVATR	1	P23396	40S ribosomal protein S3	90	VELYAEkVATRGL
Kpyri-pc	K	3	GGKPEPPAMPQPVPTA	1	P23396	40S ribosomal protein S3	230	SEQKGGkPEPPAM
Kpyri-pc	K	2	VKIMLPWDPTGK	3	P23396	40S ribosomal protein S3	187	VLGIKVkIMLPWD
Kpyri-pc	K	3	MAKQGQMDAVR	1	O43633	Charged multivesicular body protein 2a	52	DIKKMAkQGQMDA
Kpyri-pc	K	9	IFSQETLTKAQILK	1	Q9UHG3	Prenylcysteine oxidase 1	415	SQETLTkAQILKL
Kpyri-pc	K	2	LKQENPNMR	1	Q96CT7	Coiled-coil domain-containing protein 124	185	AQLPRLkQENPNM
Kpyri-pc	K	1	KLDDTKFR	2	Q13242	Serine/arginine-rich splicing factor 9	164	MEYALRkLDDTKF
Kpyri-pc	K	1	KLMVALAK	2	P07355	Annexin A2	169	TSGDFRkLMVALA
Kpyri-pc	K	18	LSLEGDHSTPPSAYGSVKAYTNFDAERDALNIETAIK	1	P07355	Annexin A2	28	SAYGSVkAYTNFD
Kpyri-pc	K	7	SEVDMLKIR	2	P07355	Annexin A2	302	SEVDMLkIRSEFK
Kpyri-pc	K	11	SLYYYIQQDTKGDYQK	1	P07355	Annexin A2	324	YIQQDTkGDYQKA
Kpyri-pc	T	1	TDLEKDIISDTSGDFR	1	P07355	Annexin A2	153	YKEMYKtDLEKDI
Kpyri-pc	K	11	TPAQYDASELKASMK	2	P07355	Annexin A2	115	YDASELkASMKGL
Kpyri-pc	T	3	AVTKYTSSK	1	Q99880	Histone H2B type 1-L	120	EGTKAVtKYTSSK
Kpyri-pc	K	9	ESYSVYVYKVLK	1	Q99880	Histone H2B type 1-L	44	YSVYVYkVLKQVH
Kpyri-pc	E	2	KESYSVYVYK	1	Q99880	Histone H2B type 1-L	36	RKRSRKeSYSVYV
Kpyri-pc	K	9	LLLPGELAKHAVSEGTK	2	Q99880	Histone H2B type 1-L	109	LPGELAkHAVSEG
Kpyri-pc	K	11	QVHPDTGISSK	2	Q99880	Histone H2B type 1-L	58	DTGISSkAMGIMN
Kpyri-pc	K	6	SAPAPKKGSK	1	Q99880	Histone H2B type 1-L	12	KSAPAPkKGSKKA
Kpyri-pc	K	1	KVEQLSR	2	P17676	CCAAT/enhancer-binding protein beta	316	NERLQKkVEQLSR
Kpyri-pc	T	1	TILKDATLTALDR	2	P40939	Trifunctional enzyme subunit alpha, mitochondrial	387	VDKGLKtILKDAT
Kpyri-pc	K	8	QMSGAQIKIANPVEGSSGR	4	Q15365	Poly(rC)-binding protein 1	314	MSGAQIkIANPVE
Kpyri-pc	Q	6	AQHEDQVEQYKK	1	P02545	Prelamin-A/C	255	RAQHEDqVEQYKK
Kpyri-pc	K	11	EAALSTALSEKR	1	P02545	Prelamin-A/C	155	STALSEkRTLEGE
Kpyri-pc	E	1	EAKLRDLEDSLAR	1	P02545	Prelamin-A/C	317	KQLAAKeAKLRDL
Kpyri-pc	E	1	ELEKTYSAK	2	P02545	Prelamin-A/C	262	VEQYKKeLEKTYS
Kpyri-pc	K	1	KLESTESR	1	P02545	Prelamin-A/C	420	SVTKKRkLESTES
Kpyri-pc	K	1	KLLEGEEER	2	P02545	Prelamin-A/C	378	EIHAYRkLLEGEE
Kpyri-pc	Q	2	KQLQDEMLR	2	P02545	Prelamin-A/C	182	LGEAKKqLQDEML
Kpyri-pc	K	1	KTLDSVAKER	1	P02545	Prelamin-A/C	90	ELGDARkTLDSVA
Kpyri-pc	K	9	LEAALGEAKK	1	P02545	Prelamin-A/C	180	AALGEAkKQLQDE
Kpyri-pc	K	2	LKDLEALLNSK	1	P02545	Prelamin-A/C	135	AAQARLkDLEALL
Kpyri-pc	K	4	LQEKEDLQELNDR	1	P02545	Prelamin-A/C	32	ITRLQEkEDLQEL
Kpyri-pc	K	8	LVEIDNGKQR	1	P02545	Prelamin-A/C	233	VEIDNGkQREFES
Kpyri-pc	K	15	NKSNEDQSMGNWQIKR	3	P02545	Prelamin-A/C	470	MGNWQIkRQNGDD
Kpyri-pc	K	3	NTKKEGDLIAAQAR	1	P02545	Prelamin-A/C	122	LKARNTkKEGDLI
Kpyri-pc	R	1	RKLESTESR	1	P02545	Prelamin-A/C	419	GSVTKKrKLESTE
Kpyri-pc	S	1	SGAQASSTPLSPTR	1	P02545	Prelamin-A/C	12	QRRATRsGAQASS
Kpyri-pc	K	7	TLDSVAKER	3	P02545	Prelamin-A/C	97	TLDSVAkERARLQ
Kpyri-pc	K	11	VAVEEVDEEGKFVR	3	P02545	Prelamin-A/C	450	EVDEEGkFVRLRN
Kpyri-pc	K	7	RRPENPKPQDGKETK	1	P67809	Y-box-binding protein 1	296	RRPENPkPQDGKE
Kpyri-pc	Y	1	YTDNKFNPK	2	O00194	Ras-related protein Rab-27B	29	TTFLYRyTDNKFN
Kpyri-pc	H	4	AGAHLQGGAK	1	P04406	Glyceraldehyde-3-phosphate dehydrogenase	111	MEKAGAhLQGGAK
Kpyri-pc	K	4	AVGKVIPELNGK	5	P04406	Glyceraldehyde-3-phosphate dehydrogenase	219	AAKAVGkVIPELN
Kpyri-pc	K	15	GALQNIIPASTGAAKAVGK	1	P04406	Glyceraldehyde-3-phosphate dehydrogenase	215	ASTGAAkAVGKVI
Kpyri-pc	K	3	LEKPAKYDDIKK	1	P04406	Glyceraldehyde-3-phosphate dehydrogenase	251	LTCRLEkPAKYDD
Kpyri-pc	K	8	TVDGPSGK	6	P04406	Glyceraldehyde-3-phosphate dehydrogenase	194	VDGPSGkLWRDGR
Kpyri-pc	K	2	VKVGVNGFGR	5	P04406	Glyceraldehyde-3-phosphate dehydrogenase	5	MGKVkVGVNGF
Kpyri-pc	K	21	VIISAPSADAPMFVMGVNHEKYDNSLK	1	P04406	Glyceraldehyde-3-phosphate dehydrogenase	139	MGVNHEkYDNSLK
Kpyri-pc	K	8	VIPELNGKLTGMAFR	2	P04406	Glyceraldehyde-3-phosphate dehydrogenase	227	IPELNGkLTGMAF
Kpyri-pc	K	3	VVKQASEGPLK	3	P04406	Glyceraldehyde-3-phosphate dehydrogenase	263	DIKKVVkQASEGP
Kpyri-pc	K	13	MVIITGPPEAQFKAQGR	3	O00425	Insulin-like growth factor 2 mRNA-binding protein 3	465	PPEAQFkAQGRIY
Kpyri-pc	K	12	AQGPAASAEEPKPVEAPAANSDQTVTVKE	1	P80723	Brain acid soluble protein 1	210	ASAEEPkPVEAPA
Kpyri-pc	K	2	FKEIQKSK	1	Q15111	Inactive phospholipase C-like protein 1	285	KIRLKFkEIQKSK
Kpyri-pc	K	2	MKGDYYR	1	P61981	14-3-3 protein gamma	127	VFYLKMkGDYYRY
Kpyri-pc	K	10	MVDREQLVQKAR	2	P61981	14-3-3 protein gamma	10	REQLVQkARLAEQ
Kpyri-pc	K	8	VISSIEQKTSADGNEK	1	P61981	14-3-3 protein gamma	69	ISSIEQkTSADGN
Kpyri-pc	K	10	YLAEVATGEKR	2	P61981	14-3-3 protein gamma	142	EVATGEkRATVVE
Kpyri-pc	K	2	VKPAPDETSFSEALLKR	2	Q12905	Interleukin enhancer-binding factor 2	45	MAFPRVkPAPDET
Kpyri-pc	E	9	AVVESCLLEQDRAR	1	Q6ZW76	Ankyrin repeat and SAM domain-containing protein 3	545	VESCLLeQDRARE
Kpyri-pc	K	7	AAYNQVKTIAQGNLSNTDVQAAK	1	P22695	Cytochrome b-c1 complex subunit 2, mitochondrial	359	AAYNQVkTIAQGN
Kpyri-pc	K	2	AKFEELNMDLFR	3	P11021	Endoplasmic reticulum chaperone BiP	326	ETLTRAkFEELNM
Kpyri-pc	S	2	KSQIFSTASDNQPTVTIK	2	P11021	Endoplasmic reticulum chaperone BiP	448	VVPTKKsQIFSTA
Kpyri-pc	K	16	IINEPTAAAIAYGLDKR	2	P11021	Endoplasmic reticulum chaperone BiP	213	IAYGLDkREGEKN
Kpyri-pc	K	15	NQLTSNPENTVFDAKR	1	P11021	Endoplasmic reticulum chaperone BiP	96	NTVFDAkRLIGRT
Kpyri-pc	K	4	QATKDAGTIAGLNVMR	2	P11021	Endoplasmic reticulum chaperone BiP	185	AQRQATkDAGTIA
Kpyri-pc	K	12	TWNDPSVQQDIKFLPFK	1	P11021	Endoplasmic reticulum chaperone BiP	113	SVQQDIkFLPFKV
Kpyri-pc	K	11	QLVEQVEQIQKEQNYQR	1	Q9BVK6	Transmembrane emp24 domain-containing protein 9	180	QVEQIQkEQNYQR
Kpyri-pc	K	2	FKSLDDVIK	3	P00352	Retinal dehydrogenase 1	412	QQIMKFkSLDDVI
Kpyri-pc	K	17	MSSSGTPDLPVLLTDLKIQYTK	1	P00352	Retinal dehydrogenase 1	17	VLLTDLkIQYTKI
Kpyri-pc	S	1	SLDDVIKR	2	P00352	Retinal dehydrogenase 1	413	QIMKFKsLDDVIK
Kpyri-pc	T	1	TVTVKISQK	1	P00352	Retinal dehydrogenase 1	491	EYTEVKtVTVKIS
Kpyri-pc	K	2	LKGDDLQAIKK	2	P07910	Heterogeneous nuclear ribonucleoproteins C1/C2	189	SKSGKLkGDDLQA
Kpyri-pc	K	8	MASNVTNKTDPR	3	P07910	Heterogeneous nuclear ribonucleoproteins C1/C2	8	ASNVTNkTDPRSM
Kpyri-pc	K	16	MIAGQVLDINLAAEPKVNR	4	P07910	Heterogeneous nuclear ribonucleoproteins C1/C2	89	NLAAEPkVNRGKA
Kpyri-pc	K	9	SDVEAIFSKYGK	2	P07910	Heterogeneous nuclear ribonucleoproteins C1/C2	39	VEAIFSkYGKIVG
Kpyri-pc	S	1	SGFNSKSGQR	1	P07910	Heterogeneous nuclear ribonucleoproteins C1/C2	171	TSRRGKsGFNSKS
Kpyri-pc	K	3	AAKVLEQLTGQTPVFSK	1	P62913	60S ribosomal protein L11	38	RLTRAAkVLEQLT
Kpyri-pc	K	7	AEEILEKGLK	1	P62913	60S ribosomal protein L11	85	AEEILEkGLKVRE
Kpyri-pc	K	3	GAKAEEILEK	1	P62913	60S ribosomal protein L11	78	CTVRGAkAEEILE
Kpyri-pc	E	6	GAKAEEILEKGLK	1	P62913	60S ribosomal protein L11	81	RGAKAEeILEKGL
Kpyri-pc	K	8	MAQDQGEKENPMR	1	P62913	60S ribosomal protein L11	8	AQDQGEkENPMRE
Kpyri-pc	K	14	VLEQLTGQTPVFSKAR	2	P62913	60S ribosomal protein L11	52	QTPVFSkARYTVR
Kpyri-pc	K	9	YDGIILPGK	1	P62913	60S ribosomal protein L11	178	GIILPGk
Kpyri-pc	K	11	ANPFGGASHAKGIVLEK	2	P62266	40S ribosomal protein S23	48	GGASHAkGIVLEK
Kpyri-pc	H	2	GHAVGDIPGVR	1	P62266	40S ribosomal protein S23	110	GFGRKGhAVGDIP
Kpyri-pc	K	6	GIVLEKVGVEAK	1	P62266	40S ribosomal protein S23	54	KGIVLEkVGVEAK
Kpyri-pc	K	1	KAHLGTALK	1	P62266	40S ribosomal protein S23	29	HDKQYKkAHLGTA
Kpyri-pc	K	5	VQLIKNGK	1	P62266	40S ribosomal protein S23	76	VRVQLIkNGKKIT
Kpyri-pc	K	1	KFYGPEGPYGVFAGR	2	O00264	Membrane-associated progesterone receptor component 1	105	DVTKGRkFYGPEG
Kpyri-pc	K	6	VFDVTKGR	1	O00264	Membrane-associated progesterone receptor component 1	102	KVFDVTkGRKFYG
Kpyri-pc	K	15	FQEYHIQQNEALAAKAGLLGQPR	2	Q9Y5J7	Mitochondrial import inner membrane translocase subunit Tim9	81	NEALAAkAGLLGQ
Kpyri-pc	S	3	AASIFGGAKPVDTAAR	2	P23588	Eukaryotic translation initiation factor 4B	359	QSTRAAsIFGGAK
Kpyri-pc	E	4	KIEEIKDFLLTAR	1	P63173	60S ribosomal protein L38	7	MPRKIEeIKDFLL
Kpyri-pc	K	1	KALSRQEMQEVQSSR	6	P22626	Heterogeneous nuclear ribonucleoproteins A2/B1	186	HNAEVRkALSRQE
Kpyri-pc	T	1	TLETVPLER	1	P22626	Heterogeneous nuclear ribonucleoproteins A2/B1	4	MEKtLETVPL
Kpyri-pc	H	3	MVHQVLYR	1	Q16762	Thiosulfate sulfurtransferase	3	MVhQVLYRA
Kpyri-pc	K	10	IPTGQEYAAKIINTK	1	Q13557	Calcium/calmodulin-dependent protein kinase type II subunit delta	43	GQEYAAkIINTKK
Kpyri-pc	K	1	KGESGQSWPR	1	Q15185	Prostaglandin E synthase 3	79	ILCCLRkGESGQS
Kpyri-pc	K	10	MAATTGSGVKVPR	1	Q13404	Ubiquitin-conjugating enzyme E2 variant 1	10	TTGSGVkVPRNFR
Kpyri-pc	K	1	KMMADEALGSGLVSR	15	Q13011	Delta(3,5)-Delta(2,4)-dienoyl-CoA isomerase, mitochondrial	231	LAFTARkMMADEA
Kpyri-pc	E	9	LTGSSAQEEASGVALGEAPDHSYESLR	1	Q13011	Delta(3,5)-Delta(2,4)-dienoyl-CoA isomerase, mitochondrial	41	GSSAQEeASGVAL
Kpyri-pc	K	1	KVIDPVAPR	1	P07814	Bifunctional glutamate/proline--tRNA ligase	498	IWAFNKkVIDPVA
Kpyri-pc	S	3	RNSRDQCCIISGESGAGK	2	Q13402	Unconventional myosin-VIIa	149	FNMKRNsRDQCCI
Kpyri-pc	S	11	RNSRDQCCIISGESGAGK	2	Q13402	Unconventional myosin-VIIa	157	DQCCIIsGESGAG
Kpyri-pc	K	2	MKEALLSIGK	1	Q96C01	Protein FAM136A	130	TMTKKMkEALLSI
Kpyri-pc	R	3	MGREFGNLTR	2	O14949	Cytochrome b-c1 complex subunit 8	3	MGrEFGNLT
Kpyri-pc	K	7	MADEIAKAQVARPGGDTIFGK	1	P49773	Histidine triad nucleotide-binding protein 1	7	MADEIAkAQVARP
Kpyri-pc	K	1	KGIVNEQFLLQR	2	P49748	Very long-chain specific acyl-CoA dehydrogenase, mitochondrial	556	KLIKHKkGIVNEQ
Kpyri-pc	K	14	TPVTDPATGAVKEK	2	P49748	Very long-chain specific acyl-CoA dehydrogenase, mitochondrial	278	TGAVKEkITAFVV
Kpyri-pc	K	2	FKTIEEVVGR	1	P05091	Aldehyde dehydrogenase, mitochondrial	428	MQILKFkTIEEVV
Kpyri-pc	N	6	ILGYINTGKQEGAK	1	P05091	Aldehyde dehydrogenase, mitochondrial	375	KILGYInTGKQEG
Kpyri-pc	K	14	TEQGPQVDETQFKK	1	P05091	Aldehyde dehydrogenase, mitochondrial	369	DETQFKkILGYIN
Kpyri-pc	K	22	VVGNPFDSKTEQGPQVDETQFKK	1	P05091	Aldehyde dehydrogenase, mitochondrial	368	VDETQFkKILGYI
Kpyri-pc	K	3	LIKSLEAAR	2	P62495	Eukaryotic peptide chain release factor subunit 1	22	KIKKLIkSLEAAR
Kpyri-pc	S	1	SEAGAGPGPK	1	Q9GZP8	Immortalization up-regulated protein	37	HKVQGRsEAGAGP
Kpyri-pc	K	13	AGVNTVTTLVENKK	2	P62424	60S ribosomal protein L7a	150	TTLVENkKAQLVV
Kpyri-pc	H	3	LAHKYRPETK	1	P62424	60S ribosomal protein L7a	100	QLLKLAhKYRPET
Kpyri-pc	K	2	LKVPPAINQFTQALDR	1	P62424	60S ribosomal protein L7a	75	ILYKRLkVPPAIN
Kpyri-pc	N	1	NFGIGQDIQPK	2	P62424	60S ribosomal protein L7a	38	FEKRPKnFGIGQD
Kpyri-pc	K	11	NFGIGQDIQPKR	1	P62424	60S ribosomal protein L7a	48	GQDIQPkRDLTRF
Kpyri-pc	K	15	TCTTVAFTQVNSEDKGALAK	1	P62424	60S ribosomal protein L7a	212	QVNSEDkGALAKL
Kpyri-pc	E	3	VVEKEAETER	1	O94905	Erlin-2	204	QKQKVVeKEAETE
Kpyri-pc	E	2	KEFTLEFSR	1	P16615	Sarcoplasmic/endoplasmic reticulum calcium ATPase 2	482	KQLMKKeFTLEFS
Kpyri-pc	T	1	TINKAWVESR	1	Q9HB71	Calcyclin-binding protein	209	DDDMKRtINKAWV
Kpyri-pc	K	16	TFVNITPAEVGVLVGKDR	1	P07737	Profilin-1	54	VGVLVGkDRSSFY
Kpyri-pc	K	11	FLQDYFDGNLKR	1	P30101	Protein disulfide-isomerase A3	362	YFDGNLkRYLKSE
Kpyri-pc	K	3	LSKDPNIVIAK	1	P30101	Protein disulfide-isomerase A3	425	LGEKLSkDPNIVI
Kpyri-pc	K	16	QAGPASVPLRTEEEFKK	1	P30101	Protein disulfide-isomerase A3	146	RTEEEFkKFISDK
Kpyri-pc	K	10	TADGIVSHLKK	1	P30101	Protein disulfide-isomerase A3	129	GIVSHLkKQAGPA
Kpyri-pc	Y	1	YKELGEK	2	P30101	Protein disulfide-isomerase A3	416	KNLEPKyKELGEK
Kpyri-pc	S	1	SIKENASAGVER	2	P51153	Ras-related protein Rab-13	105	IQNWMKsIKENAS
Kpyri-pc	K	19	EGTGSTATSSSSTAGAAGKGK	1	O15372	Eukaryotic translation initiation factor 3 subunit H	24	TAGAAGkGKGKGG
Kpyri-pc	E	2	KEGTGSTATSSSSTAGAAGK	1	O15372	Eukaryotic translation initiation factor 3 subunit H	6	MASRKeGTGSTA
Kpyri-pc	H	1	HNGPNDASDGTVR	1	P31942	Heterogeneous nuclear ribonucleoprotein H3	7	MDWVMKhNGPNDA
Kpyri-pc	K	10	DAVTYTEHAKR	1	P62805	Histone H4	78	TYTEHAkRKTVTA
Kpyri-pc	K	8	DNIQGITKPAIR	2	P62805	Histone H4	32	NIQGITkPAIRRL
Kpyri-pc	T	2	KTVTAMDVVYALK	14	P62805	Histone H4	81	EHAKRKtVTAMDV
Kpyri-pc	D	7	KTVTAMDVVYALKR	1	P62805	Histone H4	86	KTVTAMdVVYALK
Kpyri-pc	Y	6	ISGLIYEETR	2	P62805	Histone H4	52	RISGLIyEETRGV
Kpyri-pc	K	12	TVTAMDVVYALK	18	P62805	Histone H4	92	DVVYALkRQGRTL
Kpyri-pc	K	9	DLAGSIIGKGGQR	3	P61978	Heterogeneous nuclear ribonucleoprotein K	405	AGSIIGkGGQRIK
Kpyri-pc	K	6	ILLQSKNAGAVIGK	1	P61978	Heterogeneous nuclear ribonucleoprotein K	52	RILLQSkNAGAVI
Kpyri-pc	Q	1	QMVKEGGIR	3	Q6NUK1	Calcium-binding mitochondrial carrier protein SCaMC-1	240	IFGGFRqMVKEGG
Kpyri-pc	K	3	ALKGIGTDEFTLNR	1	P12429	Annexin A3	263	RLHRALkGIGTDE
Kpyri-pc	Q	1	QLIVKEYQAAYGK	1	P12429	Annexin A3	54	RSNAQRqLIVKEY
Kpyri-pc	K	8	LQEETGAKISVLGK	1	Q07666	KH domain-containing, RNA-binding, signal transduction-associated protein 1	194	QEETGAkISVLGK
Kpyri-pc	S	1	SLESINSR	4	P62888	60S ribosomal protein L30	10	AKKTKKsLESINS
Kpyri-pc	K	9	SMPEQTGEK	1	P62888	60S ribosomal protein L30	115	PEQTGEk
Kpyri-pc	K	2	LKEEAEK	1	Q969P6	DNA topoisomerase I, mitochondrial	164	EEKQKLkEEAEKL
Kpyri-pc	Q	1	QKEGNFDIVSGTR	1	O60762	Dolichol-phosphate mannosyltransferase subunit 1	135	PEFIRKqKEGNFD
Kpyri-pc	K	7	ETAQAIKGMHIR	1	P18621	60S ribosomal protein L17	37	ETAQAIkGMHIRK
Kpyri-pc	D	3	GLDVDSLVIEHIQVNKAPK	1	P18621	60S ribosomal protein L17	108	AELKGLdVDSLVI
Kpyri-pc	Y	1	YLKDVTLQK	1	P18621	60S ribosomal protein L17	47	IRKATKyLKDVTL
Kpyri-pc	K	15	FFVADTANEALEAAKR	1	Q96I99	Succinate--CoA ligase [GDP-forming] subunit beta, mitochondrial	73	EALEAAkRLNAKE
Kpyri-pc	K	6	GFGFIKLESR	1	P23246	Splicing factor, proline- and glutamine-rich	338	KGFGFIkLESRAL
Kpyri-pc	K	8	GIVEFASKPAAR	5	P23246	Splicing factor, proline- and glutamine-rich	421	IVEFASkPAARKA
Kpyri-pc	S	1	SLDEMEKQQR	1	P23246	Splicing factor, proline- and glutamine-rich	496	YSQRWKsLDEMEK
Kpyri-pc	K	4	ALDKLDGTEINGR	2	Q13247	Serine/arginine-rich splicing factor 6	165	MKRALDkLDGTEI
Kpyri-pc	K	3	GGKELGLR	1	Q92743	Serine protease HTRA1	305	TTQRGGkELGLRN
Kpyri-pc	K	2	IKDVDEKADIALIK	2	Q92743	Serine protease HTRA1	243	TYEAKIkDVDEKA
Kpyri-pc	K	2	VKVELKNGATYEAK	1	Q92743	Serine protease HTRA1	229	TNKHRVkVELKNG
Kpyri-pc	K	6	AYLLGKEDAAR	1	Q13501	Sequestosome-1	13	KAYLLGkEDAARE
Kpyri-pc	K	7	MASLTVKAYLLGKEDAAR	1	Q13501	Sequestosome-1	7	MASLTVkAYLLGK
Kpyri-pc	K	1	KAIVER	1	P62910	60S ribosomal protein L32	109	VSSKNRkAIVERA
Kpyri-pc	K	9	SIPTDNQIKAR	1	P15559	NAD(P)H dehydrogenase [quinone] 1	271	PTDNQIkARK
Kpyri-pc	K	29	VADGLPLAASMQEDEQSGRDLQQYQSQAKQLFR	1	O75396	Vesicle-trafficking protein SEC22b	38	QYQSQAkQLFRKL
Kpyri-pc	Q	30	VADGLPLAASMQEDEQSGRDLQQYQSQAKQLFR	1	O75396	Vesicle-trafficking protein SEC22b	39	YQSQAKqLFRKLN
Kpyri-pc	E	14	TSQIGESFEEILEETVISTK	1	Q16352	Alpha-internexin	476	FEEILEeTVISTK
Kpyri-pc	T	15	TSQIGESFEEILEETVISTK	1	Q16352	Alpha-internexin	477	EEILEEtVISTKK
Kpyri-pc	K	6	YIGIVKQAGLER	1	P52597	Heterogeneous nuclear ribonucleoprotein F	224	RYIGIVkQAGLER
Kpyri-pc	T	4	HNGTGGKSIYGEKFEDENFILK	2	P62937	Peptidyl-prolyl cis-trans isomerase A	73	FTRHNGtGGKSIY
Kpyri-pc	K	2	VKEGMNIVEAMER	3	P62937	Peptidyl-prolyl cis-trans isomerase A	133	VVFGKVkEGMNIV
Kpyri-pc	K	9	VSFELFADKVPK	2	P62937	Peptidyl-prolyl cis-trans isomerase A	28	FELFADkVPKTAE
Kpyri-pc	K	12	VSFELFADKVPKTAENFR	2	P62937	Peptidyl-prolyl cis-trans isomerase A	31	FADKVPkTAENFR
Kpyri-pc	K	7	GDIVDIKGMGTVQK	5	P46778	60S ribosomal protein L21	43	GDIVDIkGMGTVQ
Kpyri-pc	K	1	KGDIVDIK	4	P46778	60S ribosomal protein L21	36	YMRIYKkGDIVDI
Kpyri-pc	K	3	IYKKGDIVDIK	2	P46778	60S ribosomal protein L21	35	TYMRIYkKGDIVD
Kpyri-pc	K	2	VKENDQK	1	P46778	60S ribosomal protein L21	110	SFLKRVkENDQKK
Kpyri-pc	N	3	AGNLGGGVVTIER	1	P35268	60S ribosomal protein L22	55	VNGKAGnLGGGVV
Kpyri-pc	K	4	VNGKAGNLGGGVVTIER	1	P35268	60S ribosomal protein L22	52	RIKVNGkAGNLGG
Kpyri-pc	N	4	VVANSKESYELR	3	P35268	60S ribosomal protein L22	105	WLRVVAnSKESYE
Kpyri-pc	K	4	ALGKSTVVPVPYEK	1	P78347	General transcription factor II-I	130	YGKALGkSTVVPV
Kpyri-pc	K	3	IVKDSLSDDVVK	1	Q6YN16	Hydroxysteroid dehydrogenase-like protein 2	318	ETFRIVkDSLSDD
Kpyri-pc	D	5	GAAVDGGKLDVGNAEVKLEEENR	1	P51572	B-cell receptor-associated protein 31	164	KKGAAVdGGKLDV
Kpyri-pc	K	2	LKDELASTK	1	P51572	B-cell receptor-associated protein 31	192	ADLQKLkDELAST
Kpyri-pc	K	8	STVAQLVKR	1	P25705	ATP synthase subunit alpha, mitochondrial	261	TVAQLVkRLTDAD
Kpyri-pc	K	12	VVDALGNAIDGKGPIGSK	4	P25705	ATP synthase subunit alpha, mitochondrial	161	GNAIDGkGPIGSK
Kpyri-pc	K	3	GGKIGLFGGAGVGK	1	P06576	ATP synthase subunit beta, mitochondrial	201	PYAKGGkIGLFGG
Kpyri-pc	K	3	GQKVLDSGAPIKIPVGPETLGR	2	P06576	ATP synthase subunit beta, mitochondrial	124	GLVRGQkVLDSGA
Kpyri-pc	K	20	TREGNDLYHEMIESGVINLKDATSK	1	P06576	ATP synthase subunit beta, mitochondrial	259	SGVINLkDATSKV
Kpyri-pc	K	9	VLDSGAPIKIPVGPETLGR	3	P06576	ATP synthase subunit beta, mitochondrial	133	DSGAPIkIPVGPE
Kpyri-pc	S	1	SIKGKLEEQRPER	2	P13693	Translationally-controlled tumor protein	98	IKDYMKsIKGKLE
Kpyri-pc	Y	1	YIKDYMK	1	P13693	Translationally-controlled tumor protein	91	KEAYKKyIKDYMK
Kpyri-pc	E	10	ALAAAGYDVEKNNSR	3	P16402	Histone H1.3	75	AAGYDVeKNNSRI
Kpyri-pc	K	12	ASGPPVSELITKAVAASK	2	P16402	Histone H1.3	47	VSELITkAVAASK
Kpyri-pc	K	6	AVAASKER	1	P16402	Histone H1.3	53	KAVAASkERSGVS
Kpyri-pc	K	9	GTGASGSFKLNK	3	P16402	Histone H1.3	107	GASGSFkLNKKAA
Kpyri-pc	K	1	KALAAAGYDVEK	6	P16402	Histone H1.3	65	SLAALKkALAAAG
Kpyri-pc	K	1	KASGPPVSELITK	2	P16402	Histone H1.3	35	ATAGKRkASGPPV
Kpyri-pc	K	4	LGLKSLVSK	1	P16402	Histone H1.3	86	RIKLGLkSLVSKG
Kpyri-pc	K	21	MSETAPLAPTIPAPAEKTPVKK	1	P16402	Histone H1.3	21	AEKTPVkKKAKKA
Kpyri-pc	K	9	SGVSLAALKK	1	P16402	Histone H1.3	64	VSLAALkKALAAA
Kpyri-pc	S	1	SLVSKGTLVQTK	2	P16402	Histone H1.3	87	IKLGLKsLVSKGT
Kpyri-pc	K	2	AKHHAISAK	1	P27824	Calnexin	127	VLMSRAkHHAISA
Kpyri-pc	K	13	DTYIENEKLISGKR	2	P04843	Dolichyl-diphosphooligosaccharide--protein glycosyltransferase subunit 1	592	EKLISGkRQELVT
Kpyri-pc	K	5	ELVLKSAVEAER	2	P04843	Dolichyl-diphosphooligosaccharide--protein glycosyltransferase subunit 1	564	VKELVLkSAVEAE
Kpyri-pc	E	1	ELVLKSAVEAERLVAGK	1	P04843	Dolichyl-diphosphooligosaccharide--protein glycosyltransferase subunit 1	560	LDAQVKeLVLKSA
Kpyri-pc	N	2	KNGVQAMVEFDSVQSAQR	1	P14866	Heterogeneous nuclear ribonucleoprotein L	230	IVIFRKnGVQAMV
Kpyri-pc	K	5	VFSGKSER	1	P14866	Heterogeneous nuclear ribonucleoprotein L	538	VKVFSGkSERSSS
Kpyri-pc	K	8	YVDTNLQKQR	2	Q9UBU8	Mortality factor 4-like protein 1	111	VDTNLQkQRELQK
Kpyri-pc	Q	2	LQKLLESDYFR	1	Q96HE7	ERO1-like protein alpha	66	RLFPRLqKLLESD
Kpyri-pc	K	5	TAGVKVETTEDLVAK	1	P38117	Electron transfer flavoprotein subunit beta	238	QRTAGVkVETTED
Kpyri-pc	K	7	VIDYAVKIR	1	P38117	Electron transfer flavoprotein subunit beta	19	VIDYAVkIRVKPD
Kpyri-pc	K	1	KLNEISK	2	P17931	Galectin-3	227	YNHRVKkLNEISK
Kpyri-pc	S	3	IVSGKDYNVTANSK	1	P00338	L-lactate dehydrogenase A chain	79	RTPKIVsGKDYNV
Kpyri-pc	K	10	SADTLWGIQKELQF	1	P00338	L-lactate dehydrogenase A chain	328	TLWGIQkELQF
Kpyri-pc	S	2	LSKEEIER	1	P0DMV9	Heat shock 70 kDa protein 1B	511	NDKGRLsKEEIER
Kpyri-pc	K	7	ITITNDKGR	1	P0DMV9	Heat shock 70 kDa protein 1B	507	ITITNDkGRLSKE
Kpyri-pc	K	15	NQVALNPQNTVFDAKR	1	P0DMV9	Heat shock 70 kDa protein 1B	71	NTVFDAkRLIGRK
Kpyri-pc	K	1	KAGIFQSVK	1	P09669	Cytochrome c oxidase subunit 6C	67	DFEEMRkAGIFQS
Kpyri-pc	E	4	MAPEVLPKPR	6	P09669	Cytochrome c oxidase subunit 6C	4	MAPeVLPKPR
Kpyri-pc	K	1	KLIAEGPGETVLVAEEEAAR	2	Q9H9J2	39S ribosomal protein L44, mitochondrial	279	GLYCDKkLIAEGP
Kpyri-pc	K	3	TIKIVGPEENLSQAEAR	1	O00469	Procollagen-lysine,2-oxoglutarate 5-dioxygenase 2	358	HEIKTIkIVGPEE
Kpyri-pc	Q	2	LQKLETLTALQAK	1	Q5T8D3	Acyl-CoA-binding domain-containing protein 5	468	NVLQRLqKLETLT
Kpyri-pc	K	11	DSYVGDEAQSK	2	P62736	Actin, aortic smooth muscle	63	GDEAQSkRGILTL
Kpyri-pc	K	11	EITALAPSTMK	5	P62736	Actin, aortic smooth muscle	328	LAPSTMkIKIIAP
Kpyri-pc	E	1	EITALAPSTMK	5	P62736	Actin, aortic smooth muscle	318	ADRMQKeITALAP
Kpyri-pc	K	11	HQGVMVGMGQKDSYVGDEAQSK	6	P62736	Actin, aortic smooth muscle	52	MVGMGQkDSYVGD
Kpyri-pc	K	2	IKIIAPPER	10	P62736	Actin, aortic smooth muscle	330	PSTMKIkIIAPPE
Kpyri-pc	K	3	MQKEITALAPSTMK	5	P62736	Actin, aortic smooth muscle	317	IADRMQkEITALA
Kpyri-pc	S	1	SYELPDGQVITIGNER	1	P62736	Actin, aortic smooth muscle	241	SSSLEKsYELPDG
Kpyri-pc	K	18	VAPEEHPTLLTEAPLNPKANREK	1	P62736	Actin, aortic smooth muscle	115	EAPLNPkANREKM
Kpyri-pc	S	3	KQSLGELIGTLNAAK	1	P60174	Triosephosphate isomerase	21	MNGRKQsLGELIG
Kpyri-pc	K	13	TATPQQAQEVHEKLR	1	P60174	Triosephosphate isomerase	188	AQEVHEkLRGWLK
Kpyri-pc	K	7	VVFEQTKVIADNVKDWSK	1	P60174	Triosephosphate isomerase	149	VVFEQTkVIADNV
Kpyri-pc	K	10	AIPNNQVLGKIER	1	O60869	Endothelial differentiation-related factor 1	123	NNQVLGkIERAIG
Kpyri-pc	K	4	INEKPQVIADYESGR	1	O60869	Endothelial differentiation-related factor 1	102	ATKINEkPQVIAD
Kpyri-pc	T	4	KGQTHTLEDFQR	1	Q99714	3-hydroxyacyl-CoA dehydrogenase type-2	108	NLKKGQtHTLEDF
Kpyri-pc	K	23	LVGQGASAVLLDLPNSGGEAQAKK	2	Q99714	3-hydroxyacyl-CoA dehydrogenase type-2	52	GGEAQAkKLGNNC
Kpyri-pc	E	10	ALAAAGYDVEKNNSR	3	P10412	Histone H1.4	74	AAGYDVeKNNSRI
Kpyri-pc	K	12	ASGPPVSELITKAVAASK	2	P10412	Histone H1.4	46	VSELITkAVAASK
Kpyri-pc	K	6	AVAASKER	1	P10412	Histone H1.4	52	KAVAASkERSGVS
Kpyri-pc	K	9	GTGASGSFKLNK	3	P10412	Histone H1.4	106	GASGSFkLNKKAA
Kpyri-pc	K	1	KALAAAGYDVEK	6	P10412	Histone H1.4	64	SLAALKkALAAAG
Kpyri-pc	K	1	KASGPPVSELITK	2	P10412	Histone H1.4	34	AGAAKRkASGPPV
Kpyri-pc	K	1	KATGAATPK	1	P10412	Histone H1.4	140	AAKKPKkATGAAT
Kpyri-pc	K	4	LGLKSLVSK	1	P10412	Histone H1.4	85	RIKLGLkSLVSKG
Kpyri-pc	S	2	MSETAPAAPAAPAPAEKTPVK	1	P10412	Histone H1.4	2	MsETAPAA
Kpyri-pc	K	17	MSETAPAAPAAPAPAEKTPVKK	2	P10412	Histone H1.4	17	APAPAEkTPVKKK
Kpyri-pc	K	9	SGVSLAALKK	1	P10412	Histone H1.4	63	VSLAALkKALAAA
Kpyri-pc	S	1	SLVSKGTLVQTK	2	P10412	Histone H1.4	86	IKLGLKsLVSKGT
Kpyri-pc	K	2	AKQTLENERGELANEVK	1	P35579	Myosin-9	1219	ANLEKAkQTLENE
Kpyri-pc	K	9	ALEEAMEQKAELER	1	P35579	Myosin-9	1492	EEAMEQkAELERL
Kpyri-pc	K	11	ASREEILAQAKENEK	1	P35579	Myosin-9	1669	EILAQAkENEKKL
Kpyri-pc	Q	12	EMEAELEDERKQR	1	P35579	Myosin-9	1604	LEDERKqRSMAVA
Kpyri-pc	D	3	KFDQLLAEEK	3	P35579	Myosin-9	1447	KKQKKFdQLLAEE
Kpyri-pc	K	1	KVEAQLQELQVK	1	P35579	Myosin-9	1249	SEHKRKkVEAQLQ
Kpyri-pc	K	5	SHAQKNENAR	1	P35579	Myosin-9	1775	ERSHAQkNENARQ
Kpyri-pc	T	1	TVKNDNSSR	1	P35579	Myosin-9	226	AFGNAKtVKNDNS
Kpyri-pc	K	2	VKVNKDDIQK	2	P35579	Myosin-9	66	ENGKKVkVNKDDI
Kpyri-pc	K	8	VRTELADKVTK	1	P35579	Myosin-9	1274	RTELADkVTKLQV
Kpyri-pc	E	1	EAEFTKSIAK	1	Q15005	Signal peptidase complex subunit 2	186	RTKQQReAEFTKS
Kpyri-pc	K	3	QIKLQIWDTAGQESFR	2	Q8WUD1	Ras-related protein Rab-2B	56	IDGKQIkLQIWDT
Kpyri-pc	E	1	EGKTDYYAR	1	P46777	60S ribosomal protein L5	25	KFRRRReGKTDYY
Kpyri-pc	K	1	KHIMGQNVADYMR	1	P46777	60S ribosomal protein L5	197	NAEVHRkHIMGQN
Kpyri-pc	K	10	SDRPELTGAKVVVSGGR	2	P13804	Electron transfer flavoprotein subunit alpha, mitochondrial	216	PELTGAkVVVSGG
Kpyri-pc	E	10	ALAAAGYDVEKNNSR	3	P16403	Histone H1.2	74	AAGYDVeKNNSRI
Kpyri-pc	K	12	ASGPPVSELITKAVAASK	2	P16403	Histone H1.2	46	VSELITkAVAASK
Kpyri-pc	K	6	AVAASKER	1	P16403	Histone H1.2	52	KAVAASkERSGVS
Kpyri-pc	K	9	GTGASGSFKLNK	3	P16403	Histone H1.2	106	GASGSFkLNKKAA
Kpyri-pc	K	1	KALAAAGYDVEK	6	P16403	Histone H1.2	64	SLAALKkALAAAG
Kpyri-pc	K	1	KASGPPVSELITK	2	P16403	Histone H1.2	34	AGGTPRkASGPPV
Kpyri-pc	K	4	LGLKSLVSK	1	P16403	Histone H1.2	85	RIKLGLkSLVSKG
Kpyri-pc	S	2	MSETAPAAPAAAPPAEK	1	P16403	Histone H1.2	2	MsETAPAA
Kpyri-pc	K	17	MSETAPAAPAAAPPAEKAPVK	1	P16403	Histone H1.2	17	AAPPAEkAPVKKK
Kpyri-pc	K	21	MSETAPAAPAAAPPAEKAPVKK	3	P16403	Histone H1.2	21	AEKAPVkKKAAKK
Kpyri-pc	K	9	SGVSLAALKK	1	P16403	Histone H1.2	63	VSLAALkKALAAA
Kpyri-pc	S	1	SLVSKGTLVQTK	2	P16403	Histone H1.2	86	IKLGLKsLVSKGT
Kpyri-pc	K	13	ERHPGSFDVVHVK	1	P62701	40S ribosomal protein S4, X isoform	211	FDVVHVkDANGNS
Kpyri-pc	H	11	ERHPGSFDVVHVKDANGNSFATR	1	P62701	40S ribosomal protein S4, X isoform	209	GSFDVVhVKDANG
Kpyri-pc	K	1	KIFVGTK	7	P62701	40S ribosomal protein S4, X isoform	128	KLCKVRkIFVGTK
Kpyri-pc	K	9	YALTGDEVKK	1	P62701	40S ribosomal protein S4, X isoform	62	LTGDEVkKICMQR
Kpyri-pc	S	2	KSVLADQGK	2	Q9NYF8	Bcl-2-associated transcription factor 1	414	YRQFRKsVLADQG
Kpyri-pc	T	2	KTVQVEQSK	1	Q16181	Septin-7	90	SHRIKKtVQVEQS
Kpyri-pc	K	2	LKDSEAELQR	1	Q16181	Septin-7	373	EKVQKLkDSEAEL
Kpyri-pc	H	2	IHSLPPEGK	1	P10176	Cytochrome c oxidase subunit 8A, mitochondrial	27	VPRAKIhSLPPEG
Kpyri-pc	K	10	IITEGFEAAKEK	1	P40227	T-complex protein 1 subunit zeta	127	EGFEAAkEKALQF
Kpyri-pc	K	5	MAAVKTLNPK	2	P40227	T-complex protein 1 subunit zeta	5	MAAVkTLNPKA
Kpyri-pc	S	5	NNQKSEPLIGR	1	P02751	Fibronectin	2073	LKNNQKsEPLIGR
Kpyri-pc	K	10	QYNVGPSVSKYPLR	1	P02751	Fibronectin	1050	VGPSVSkYPLRNL
Kpyri-pc	K	9	AALQELLSKGLIK	1	P62851	40S ribosomal protein S25	94	LQELLSkGLIKLV
Kpyri-pc	K	6	EVPNYKLITPAVVSER	1	P62851	40S ribosomal protein S25	66	KEVPNYkLITPAV
Kpyri-pc	K	13	AITGASLADIMAKR	4	P83731	60S ribosomal protein L24	93	LADIMAkRNQKPE
Kpyri-pc	K	4	TDGKVFQFLNAK	4	P83731	60S ribosomal protein L24	27	YARTDGkVFQFLN
Kpyri-pc	K	2	AKEILTNEESR	1	Q9UKB3	DnaJ homolog subfamily C member 12	63	QKLQKAkEILTNE
Kpyri-pc	K	4	TGVKLPGGLEPK	1	P22692	Insulin-like growth factor-binding protein 4	236	DRKTGVkLPGGLE
Kpyri-pc	T	3	ELTIGSKLQDAEIAR	1	P06703	Protein S100-A6	43	LIQKELtIGSKLQ
Kpyri-pc	K	2	GKLDGNQDLIR	2	P48735	Isocitrate dehydrogenase [NADP], mitochondrial	384	GLEHRGkLDGNQD
Kpyri-pc	S	1	SIVEKIQAK	1	O95197	Reticulon-3	1014	ARDQTKsIVEKIQ
Kpyri-pc	K	8	ALDFIASKGVK	1	O43707	Alpha-actinin-4	122	LDFIASkGVKLVS
Kpyri-pc	K	7	GVVVLAKSYNEQR	3	P42330	Aldo-keto reductase family 1 member C3	270	GVVVLAkSYNEQR
Kpyri-pc	D	10	IADGSVKREDIFYTSK	1	P42330	Aldo-keto reductase family 1 member C3	78	GSVKREdIFYTSK
Kpyri-pc	K	9	TVWSSGDDKEQLVK	1	O43291	Kunitz-type protease inhibitor 2	242	WSSGDDkEQLVKN
Kpyri-pc	K	10	LAQEEESEAKR	1	O00541	Pescadillo homolog	533	EEESEAkRLAIMM
Kpyri-pc	K	1	KIYTNVKID	4	Q9HD45	Transmembrane 9 superfamily member 3	581	TSAFVRkIYTNVK
Kpyri-pc	K	2	GKFEDMAK	1	P09429	High mobility group protein B1	59	SAKEKGkFEDMAK
Kpyri-pc	H	2	KHPDASVNFSEFSKK	1	P09429	High mobility group protein B1	31	EEHKKKhPDASVN
Kpyri-pc	K	1	KLGEMWNNTAADDKQPYEK	2	P09429	High mobility group protein B1	128	IGDVAKkLGEMWN
Kpyri-pc	K	2	IKGEHPGLSIGDVAK	3	P09429	High mobility group protein B1	114	EYRPKIkGEHPGL
Kpyri-pc	K	1	KFGYVDFESAEDLEK	1	P19338	Nucleolin	348	RIGMTRkFGYVDF
Kpyri-pc	D	4	FAGDKGYLTKEDLR	1	P60903	Protein S100-A10	22	FHKFAGdKGYLTK
Kpyri-pc	K	6	MVAAAKYAR	1	P36542	ATP synthase subunit gamma, mitochondrial	55	KMVAAAkYARAER
Kpyri-pc	N	2	ANAEKTSGSNVK	1	P56381	ATP synthase subunit epsilon, mitochondrial	34	KTEFKAnAEKTSG
Kpyri-pc	K	9	AAIDWFDGKEFHGNIIK	1	Q92804	TATA-binding protein-associated factor 2N	306	IDWFDGkEFHGNI
Kpyri-pc	K	2	AKAEEMLSK	1	P62993	Growth factor receptor-bound protein 2	69	GKIPRAkAEEMLS
Kpyri-pc	K	4	FAAKGEGQLGPAER	1	P13639	Elongation factor 2	239	VAKFAAkGEGQLG
Kpyri-pc	N	3	MVNFTVDQIR	1	P13639	Elongation factor 2	3	MVnFTVDQI
Kpyri-pc	Q	2	KQDAFYKEQLAR	1	Q9NX63	MICOS complex subunit MIC19	137	DRVLKKqDAFYKE
Kpyri-pc	K	15	YSGAYGASVSDEELKR	1	Q9NX63	MICOS complex subunit MIC19	63	VSDEELkRRVAEE
Kpyri-pc	K	5	TLGGKQPVYDTTIR	1	Q9UPN3	Microtubule-actin cross-linking factor 1, isoforms 1/2/3/5	6604	QKTLGGkQPVYDT
Kpyri-pc	K	11	AEDKEWMPVTKLGR	1	P15880	40S ribosomal protein S2	65	EWMPVTkLGRLVK
Kpyri-pc	K	11	TYSYLTPDLWKETVFTK	1	P15880	40S ribosomal protein S2	257	LTPDLWkETVFTK
Kpyri-pc	E	6	KAAALEAMKDYTK	1	P31948	Stress-induced-phosphoprotein 1	439	RKAAALeAMKDYT
Kpyri-pc	K	13	ALGQNPTNAEVLKVLGNPK	3	P60660	Myosin light polypeptide 6	50	TNAEVLkVLGNPK
Kpyri-pc	N	4	VLGNPKSDEMNVK	1	P60660	Myosin light polypeptide 6	54	VLKVLGnPKSDEM
Kpyri-pc	K	9	AEGAQNQGKKAEGAQNQGK	1	Q9P2E9	Ribosome-binding protein 1	340	GAQNQGkKAEGAQ
Kpyri-pc	K	9	AEGAQNQGKKAEGAQNQGK	1	Q9P2E9	Ribosome-binding protein 1	360	GAQNQGkKAEGAQ
Kpyri-pc	K	9	AEGAQNQGKKAEGAQNQGK	1	Q9P2E9	Ribosome-binding protein 1	380	GAQNQGkKAEGAQ
Kpyri-pc	K	9	AEGAQNQGKKAEGAQNQGK	1	Q9P2E9	Ribosome-binding protein 1	410	GAQNQGkKAEGAQ
Kpyri-pc	K	9	AEGAQNQGKKAEGAQNQGK	1	Q9P2E9	Ribosome-binding protein 1	430	GAQNQGkKAEGAQ
Kpyri-pc	K	9	AEGAQNQGKKAEGAQNQGK	1	Q9P2E9	Ribosome-binding protein 1	450	GAQNQGkKAEGAQ
Kpyri-pc	K	9	AEGAQNQGKKAEGAQNQGK	1	Q9P2E9	Ribosome-binding protein 1	490	GAQNQGkKAEGAQ
Kpyri-pc	K	2	AKVGAAEEELQK	1	Q9P2E9	Ribosome-binding protein 1	1159	EQVWRAkVGAAEE
Kpyri-pc	K	10	KADAAANQGKK	1	Q9P2E9	Ribosome-binding protein 1	598	AAANQGkKTESAS
Kpyri-pc	K	1	KADSVANQGTKVEGITNQGK	1	Q9P2E9	Ribosome-binding protein 1	549	APIQGKkADSVAN
Kpyri-pc	K	1	KAEGAQNQAK	1	Q9P2E9	Ribosome-binding protein 1	291	APTQGRkAEGAQN
Kpyri-pc	K	1	KAEGAQNQGK	2	Q9P2E9	Ribosome-binding protein 1	261	TPNQGKkAEGAQN
Kpyri-pc	K	1	KAEGAQNQGK	2	Q9P2E9	Ribosome-binding protein 1	311	AQNQGKkAEGAQN
Kpyri-pc	K	1	KAEGAQNQGK	2	Q9P2E9	Ribosome-binding protein 1	331	AQNQGKkAEGAQN
Kpyri-pc	K	1	KAEGAQNQGK	2	Q9P2E9	Ribosome-binding protein 1	341	AQNQGKkAEGAQN
Kpyri-pc	K	1	KAEGAQNQGK	2	Q9P2E9	Ribosome-binding protein 1	351	AQNQGKkAEGAQN
Kpyri-pc	K	1	KAEGAQNQGK	2	Q9P2E9	Ribosome-binding protein 1	361	AQNQGKkAEGAQN
Kpyri-pc	K	1	KAEGAQNQGK	2	Q9P2E9	Ribosome-binding protein 1	371	AQNQGKkAEGAQN
Kpyri-pc	K	1	KAEGAQNQGK	2	Q9P2E9	Ribosome-binding protein 1	381	AQNQGKkAEGAQN
Kpyri-pc	K	1	KAEGAQNQGK	2	Q9P2E9	Ribosome-binding protein 1	401	AQNQGKkAEGAQN
Kpyri-pc	K	1	KAEGAQNQGK	2	Q9P2E9	Ribosome-binding protein 1	411	AQNQGKkAEGAQN
Kpyri-pc	K	1	KAEGAQNQGK	2	Q9P2E9	Ribosome-binding protein 1	421	AQNQGKkAEGAQN
Kpyri-pc	K	1	KAEGAQNQGK	2	Q9P2E9	Ribosome-binding protein 1	431	AQNQGKkAEGAQN
Kpyri-pc	K	1	KAEGAQNQGK	2	Q9P2E9	Ribosome-binding protein 1	441	AQNQGKkAEGAQN
Kpyri-pc	K	1	KAEGAQNQGK	2	Q9P2E9	Ribosome-binding protein 1	451	AQNQGKkAEGAQN
Kpyri-pc	K	1	KAEGAQNQGK	2	Q9P2E9	Ribosome-binding protein 1	461	AQNQGKkAEGAQN
Kpyri-pc	K	1	KAEGAQNQGK	2	Q9P2E9	Ribosome-binding protein 1	481	AQNQGKkAEGAQN
Kpyri-pc	K	1	KAEGAQNQGK	2	Q9P2E9	Ribosome-binding protein 1	491	AQNQGKkAEGAQN
Kpyri-pc	K	1	KAEGTPNQGK	1	Q9P2E9	Ribosome-binding protein 1	221	APNQGRkAEGTPN
Kpyri-pc	K	1	KAEGTPNQGK	1	Q9P2E9	Ribosome-binding protein 1	241	TPNQGKkAEGTPN
Kpyri-pc	K	1	KAEGTPNQGK	1	Q9P2E9	Ribosome-binding protein 1	251	TPNQGKkAEGTPN
Kpyri-pc	E	3	KGEGAPIQGK	1	Q9P2E9	Ribosome-binding protein 1	541	NQGKKGeGAPIQG
Kpyri-pc	K	1	KGEGAQNQGK	1	Q9P2E9	Ribosome-binding protein 1	321	AQNQGKkGEGAQN
Kpyri-pc	K	1	KGEGAQNQGK	1	Q9P2E9	Ribosome-binding protein 1	511	AQNQGQkGEGAQN
Kpyri-pc	K	1	KVEGAPTQGR	1	Q9P2E9	Ribosome-binding protein 1	281	TPNQGKkVEGAPT
Kpyri-pc	K	1	KVEGAQNQGK	1	Q9P2E9	Ribosome-binding protein 1	301	AQNQAKkVEGAQN
Kpyri-pc	K	1	KVEGAQNQGK	1	Q9P2E9	Ribosome-binding protein 1	391	AQNQGKkVEGAQN
Kpyri-pc	K	1	KVEGAQNQGK	1	Q9P2E9	Ribosome-binding protein 1	471	AQNQGKkVEGAQN
Kpyri-pc	K	12	NTDVAQSPEAPKQEAPAK	1	Q9P2E9	Ribosome-binding protein 1	620	QSPEAPkQEAPAK
Kpyri-pc	K	18	NTDVAQSPEAPKQEAPAKK	1	Q9P2E9	Ribosome-binding protein 1	626	KQEAPAkKKSGSK
Kpyri-pc	K	11	LEIEPEWAYGKK	1	Q00688	Peptidyl-prolyl cis-trans isomerase FKBP3	200	PEWAYGkKGQPDA
Kpyri-pc	K	3	LVKPGNQNTQVTEAWNK	1	Q9UQ80	Proliferation-associated protein 2G4	158	AALRLVkPGNQNT
Kpyri-pc	K	1	KGHYAER	1	P16104	Histone H2AX	37	VHRLLRkGHYAER
Kpyri-pc	K	9	ATGDETGAKVER	2	P61247	40S ribosomal protein S3a	249	GDETGAkVERADG
Kpyri-pc	K	8	EVQTNDLKEVVNK	2	P61247	40S ribosomal protein S3a	182	VQTNDLkEVVNKL
Kpyri-pc	K	2	FKLITEDVQGK	2	P61247	40S ribosomal protein S3a	85	VAFRKFkLITEDV
Kpyri-pc	K	1	KMMEIMTR	7	P61247	40S ribosomal protein S3a	167	VRQIRKkMMEIMT
Kpyri-pc	K	7	IASDGLKGR	2	P61247	40S ribosomal protein S3a	63	IASDGLkGRVFEV
Kpyri-pc	N	1	NIGKTLVTR	2	P61247	40S ribosomal protein S3a	43	AMFNIRnIGKTLV
Kpyri-pc	D	3	VVDPFSKKDWYDVK	1	P61247	40S ribosomal protein S3a	23	AKKKVVdPFSKKD
Kpyri-pc	K	2	GKYKEETIEK	1	P61254	60S ribosomal protein L26	134	VGKEKGkYKEETI
Kpyri-pc	Y	2	KYVIYIER	1	P61254	60S ribosomal protein L26	78	QVYRKKyVIYIER
Kpyri-pc	R	11	IMSSPLSKELR	2	P61254	60S ribosomal protein L26	39	PLSKELrQKYNVR
Kpyri-pc	K	2	MKFNPFVTSDR	4	P61254	60S ribosomal protein L26	2	MkFNPFVT
Kpyri-pc	K	2	IKIIAPPER	10	Q562R1	Beta-actin-like protein 2	329	PSTMKIkIIAPPE
Kpyri-pc	S	1	SYELPDGQVITIGNER	1	Q562R1	Beta-actin-like protein 2	240	SSSPERsYELPDG
Kpyri-pc	K	18	VAPDEHPILLTEAPLNPK	1	Q562R1	Beta-actin-like protein 2	114	EAPLNPkINREKM
Kpyri-pc	K	1	KIFVGGLSPDTPEEK	1	Q14103	Heterogeneous nuclear ribonucleoprotein D0	183	TKEPVKkIFVGGL
Kpyri-pc	T	3	AVTKYTSSK	1	Q8N257	Histone H2B type 3-B	120	EGTKAVtKYTSSK
Kpyri-pc	E	2	KESYSIYVYK	1	Q8N257	Histone H2B type 3-B	36	RKRGRKeSYSIYV
Kpyri-pc	K	9	LLLPGELAKHAVSEGTK	2	Q8N257	Histone H2B type 3-B	109	LPGELAkHAVSEG
Kpyri-pc	D	3	MPDPSKSAPAPK	1	Q8N257	Histone H2B type 3-B	3	MPdPSKSAP
Kpyri-pc	K	11	QVHPDTGISSK	2	Q8N257	Histone H2B type 3-B	58	DTGISSkAMGIMN
Kpyri-pc	K	6	SAPAPKKGSK	1	Q8N257	Histone H2B type 3-B	12	KSAPAPkKGSKKA
Kpyri-pc	K	7	MSSGNAKIGHPAPNFK	1	Q06830	Peroxiredoxin-1	7	MSSGNAkIGHPAP
Kpyri-pc	K	10	TIAQDYGVLKADEGISFR	1	Q06830	Peroxiredoxin-1	120	QDYGVLkADEGIS
Kpyri-pc	K	4	DNPKPNVSEALR	1	P82909	28S ribosomal protein S36, mitochondrial	33	DRRDNPkPNVSEA
Kpyri-pc	K	13	GGPNIITLADIVKDPVSR	1	P68400	Casein kinase II subunit alpha	102	TLADIVkDPVSRT
Kpyri-pc	S	23	ILENLRGGPNIITLADIVKDPVSR	1	P68400	Casein kinase II subunit alpha	106	IVKDPVsRTPALV
Kpyri-pc	K	1	KAQCPIVER	2	P46782	40S ribosomal protein S5	63	AAKRFRkAQCPIV
Kpyri-pc	K	1	KGQGGAGAGDDEEED	1	P46781	40S ribosomal protein S9	180	KRKNAKkGQGGAG
Kpyri-pc	K	1	KTYVTPR	4	P46781	40S ribosomal protein S9	11	RSWVCRkTYVTPR
Kpyri-pc	D	2	LDSQKHIDFSLR	1	P46781	40S ribosomal protein S9	152	SFIVRLdSQKHID
Kpyri-pc	K	5	LGLAKSIHHAR	1	P46781	40S ribosomal protein S9	121	FKLGLAkSIHHAR
Kpyri-pc	K	3	NAKKGQGGAGAGDDEEED	1	P46781	40S ribosomal protein S9	179	VKRKNAkKGQGGA
Kpyri-pc	K	1	KLDNTKFR	1	Q07955	Serine/arginine-rich splicing factor 1	174	MTYAVRkLDNTKF
Kpyri-pc	K	10	FGEVVDCTIKTDPVTGR	1	O14979	Heterogeneous nuclear ribonucleoprotein D-like	180	VVDCTIkTDPVTG
Kpyri-pc	K	5	VAQPKEVYR	1	O14979	Heterogeneous nuclear ribonucleoprotein D-like	311	IKVAQPkEVYRQQ
Kpyri-pc	K	1	KIGELVR	1	P55265	Double-stranded RNA-specific adenosine deaminase	715	MPNKVRkIGELVR
Kpyri-pc	K	3	VAKQDAAMK	1	P55265	Double-stranded RNA-specific adenosine deaminase	558	GSKKVAkQDAAMK
Kpyri-pc	K	12	GTDTVAGLALIKK	1	P43490	Nicotinamide phosphoribosyltransferase	228	AGLALIkKYYGTK
Kpyri-pc	K	3	VTKSYSFDEIRK	1	P43490	Nicotinamide phosphoribosyltransferase	469	KNGKVTkSYSFDE
Kpyri-pc	K	1	KGFSEGLWEIENNPTVK	1	P51858	Hepatoma-derived growth factor	80	GKPNKRkGFSEGL
Kpyri-pc	K	9	AAYLQETGKPLDETLK	1	P04083	Annexin A1	90	YLQETGkPLDETL
Kpyri-pc	K	4	DLAKDITSDTSGDFR	4	P04083	Annexin A1	166	LKRDLAkDITSDT
Kpyri-pc	S	5	GGPGSAVSPYPTFNPSSDVAALHK	3	P04083	Annexin A1	34	SKGGPGsAVSPYP
Kpyri-pc	K	8	NALLSLAKGDR	3	P04083	Annexin A1	185	ALLSLAkGDRSED
Kpyri-pc	K	17	QAWFIENEEQEYVQTVKSSK	1	P04083	Annexin A1	26	EYVQTVkSSKGGP
Kpyri-pc	K	4	QQIKAAYLQETGKPLDETLKK	1	P04083	Annexin A1	81	AQRQQIkAAYLQE
Kpyri-pc	K	9	SEIDMNDIKAFYQK	2	P04083	Annexin A1	312	IDMNDIkAFYQKM
Kpyri-pc	S	4	VVASDKETYELR	2	Q6P5R6	60S ribosomal protein L22-like 1	99	WLRVVAsDKETYE
Kpyri-pc	K	8	STLNPNAKEFNPR	1	Q99700	Ataxin-2	919	TLNPNAkEFNPRS
Kpyri-pc	K	6	AAINQKLIETGERER	1	Q9NPA8	Transcription and mRNA export factor ENY2	19	RAAINQkLIETGE
Kpyri-pc	S	1	SVKALADYIR	1	Q9BS26	Endoplasmic reticulum resident protein 44	128	EYRGQRsVKALAD
Kpyri-pc	K	1	KALDIAENEMPGLMR	1	P23526	Adenosylhomocysteinase	20	LAAWGRkALDIAE
Kpyri-pc	K	10	MPILGLGTWKSPPGQVTEAVK	1	P15121	Aldo-keto reductase family 1 member B1	22	LGLGTWkSPPGQV
Kpyri-pc	K	7	NLVVIPKSVTPER	3	P15121	Aldo-keto reductase family 1 member B1	263	NLVVIPkSVTPER
Kpyri-pc	D	2	LDEELKNK	1	Q9Y5T5	Ubiquitin carboxyl-terminal hydrolase 16	335	NSTEKLdEELKNK
Kpyri-pc	E	2	IEKELLQK	1	Q8TBF8	Protein FAM81A	244	QEQERIeKELLQK
Kpyri-pc	K	2	IKTDGAAPNVAPSDVGGGGGR	1	Q12860	Contactin-1	700	IPSNRIkTDGAAP
Kpyri-pc	K	7	KGHVSFKPSLDQQR	1	Q06033	Inter-alpha-trypsin inhibitor heavy chain H3	227	KGHVSFkPSLDQQ
Kpyri-pc	E	3	IGEKYVDMSVK	1	P48047	ATP synthase subunit O, mitochondrial	191	MIVRIGeKYVDMS
Kpyri-pc	K	8	SLNDITAKER	1	P48047	ATP synthase subunit O, mitochondrial	98	LNDITAkERFSPL
Kpyri-pc	K	2	VKSLNDITAK	1	P48047	ATP synthase subunit O, mitochondrial	90	KRSIKVkSLNDIT
Kpyri-pc	K	8	ADKDYHFKVDNDENEHQLSLR	1	P06748	Nucleophosmin	32	DKDYHFkVDNDEN
Kpyri-pc	K	2	AKMQASIEK	2	P06748	Nucleophosmin	250	VEDIKAkMQASIE
Kpyri-pc	K	5	DTPAKNAQK	1	P06748	Nucleophosmin	202	IRDTPAkNAQKSN
Kpyri-pc	K	9	GPSSVEDIKAKMQASIEK	2	P06748	Nucleophosmin	248	SSVEDIkAKMQAS
Kpyri-pc	K	7	MQASIEKGGSLPK	3	P06748	Nucleophosmin	257	MQASIEkGGSLPK
Kpyri-pc	K	13	MQASIEKGGSLPKVEAK	2	P06748	Nucleophosmin	263	KGGSLPkVEAKFI
Kpyri-pc	S	1	SKGQESFK	1	P06748	Nucleophosmin	222	PSSTPRsKGQESF
Kpyri-pc	K	3	TPKGPSSVEDIKAK	3	P06748	Nucleophosmin	239	KTPKTPkGPSSVE
Kpyri-pc	E	2	VEAKFINYVK	2	P06748	Nucleophosmin	265	GSLPKVeAKFINY
Kpyri-pc	K	1	KFNALFAQGNYSEAAK	2	Q00610	Clathrin heavy chain 1	367	EELFARkFNALFA
Kpyri-pc	K	18	LHIIEVGTPPTGNQPFPKK	1	Q00610	Clathrin heavy chain 1	245	GNQPFPkKAVDVF
Kpyri-pc	T	1	TGQIKEVER	1	Q00610	Clathrin heavy chain 1	738	IQAACKtGQIKEV
Kpyri-pc	T	1	TLKEQGR	1	P41252	Isoleucine--tRNA ligase, cytoplasmic	380	DKSIIRtLKEQGR
Kpyri-pc	K	2	AKAILDASR	1	O00567	Nucleolar protein 56	242	MDGAKAkAILDAS
Kpyri-pc	S	2	ISSPTETER	1	P31949	Protein S100-A11	5	MAKIsSPTETE
Kpyri-pc	K	3	MAKISSPTETER	1	P31949	Protein S100-A11	3	MAkISSPTE
Kpyri-pc	Y	1	YAGKDGYNYTLSK	3	P31949	Protein S100-A11	24	IAVFQKyAGKDGY
Kpyri-pc	K	1	KLSEADNRK	1	Q9UNL2	Translocon-associated protein subunit gamma	103	SKEVTRkLSEADN
Kpyri-pc	K	8	VELSNGEKR	1	P84103	Serine/arginine-rich splicing factor 3	85	ELSNGEkRSRNRG
Kpyri-pc	K	12	VYVGNLGNNGNKTELER	2	P84103	Serine/arginine-rich splicing factor 3	23	LGNNGNkTELERA
Kpyri-pc	K	2	AKQGYVIYR	1	P61313	60S ribosomal protein L15	56	RLGYKAkQGYVIY
Kpyri-pc	E	3	YLEKSGVLDTLTK	1	Q99417	c-Myc-binding protein	19	QFRRYLeKSGVLD
Kpyri-pc	E	5	MAGPESDAQYQFTGIK	7	Q96IX5	ATP synthase membrane subunit DAPIT, mitochondrial	5	MAGPeSDAQYQ
Kpyri-pc	K	1	KVDWLTEK	1	P38919	Eukaryotic initiation factor 4A-III	289	FCNTKRkVDWLTE
Kpyri-pc	K	2	GKWNEPFDETYTR	1	P50453	Serpin B9	170	AIYFKGkWNEPFD
Kpyri-pc	K	7	ALPGQLKPFETLLSQNQGGK	1	P09211	Glutathione S-transferase P	128	ALPGQLkPFETLL
Kpyri-pc	K	2	GKGFSVVADTPELQR	1	Q14847	LIM and SH3 domain protein 1	96	FEKNKGkGFSVVA
Kpyri-pc	K	2	LKQQSELQSQVR	2	Q14847	LIM and SH3 domain protein 1	75	PENLRLkQQSELQ
Kpyri-pc	N	4	KAGNFYVPAEPK	1	P18124	60S ribosomal protein L7	80	MARKAGnFYVPAE
Kpyri-pc	K	1	KTTHFVEGGDAGNREDQINR	1	P18124	60S ribosomal protein L7	223	RGGMKKkTTHFVE
Kpyri-pc	K	8	SVNELIYKR	1	P18124	60S ribosomal protein L7	156	VNELIYkRGYGKI
Kpyri-pc	K	9	EANQAINPKLLQLVEDR	1	P17844	Probable ATP-dependent RNA helicase DDX5	470	NQAINPkLLQLVE
Kpyri-pc	K	1	KFGNPGEK	1	P17844	Probable ATP-dependent RNA helicase DDX5	33	GPLSGKkFGNPGE
Kpyri-pc	E	8	LMEEIMSEKENK	1	P17844	Probable ATP-dependent RNA helicase DDX5	339	MEEIMSeKENKTI
Kpyri-pc	S	1	SKEITVR	1	P17844	Probable ATP-dependent RNA helicase DDX5	79	VETYRRsKEITVR
Kpyri-pc	K	7	FAADAVKLER	1	P37837	Transaldolase	321	FAADAVkLERMLT
Kpyri-pc	K	1	KTDFVNSR	1	Q99959	Plakophilin-2	864	KKAQFKkTDFVNS
Kpyri-pc	K	8	ETGVDLTKDNMALQR	1	P38646	Stress-70 protein, mitochondrial	300	TGVDLTkDNMALQ
Kpyri-pc	K	1	KDSETGENIR	1	P38646	Stress-70 protein, mitochondrial	625	RELLARkDSETGE
Kpyri-pc	E	3	NAEKYAEEDRR	1	P38646	Stress-70 protein, mitochondrial	566	NMVKNAeKYAEED
Kpyri-pc	K	5	NVPFKIVR	1	P38646	Stress-70 protein, mitochondrial	143	IKNVPFkIVRASN
Kpyri-pc	Q	1	QAKVLENAEGAR	1	P38646	Stress-70 protein, mitochondrial	74	AVMEGKqAKVLEN
Kpyri-pc	K	14	QAVTNPNNTFYATKR	1	P38646	Stress-70 protein, mitochondrial	121	NTFYATkRLIGRR
Kpyri-pc	E	5	AGAVEKGVPLYR	1	P06733	Alpha-enolase	125	CKAGAVeKGVPLY
Kpyri-pc	K	20	FTASAGIQVVGDDLTVTNPKR	4	P06733	Alpha-enolase	326	LTVTNPkRIAKAV
Kpyri-pc	K	3	LAKYNQLLR	1	P06733	Alpha-enolase	406	RSERLAkYNQLLR
Kpyri-pc	K	8	IEEELGSKAK	1	P06733	Alpha-enolase	420	EEELGSkAKFAGR
Kpyri-pc	S	2	MSILKIHAR	1	P06733	Alpha-enolase	2	MsILKIHA
Kpyri-pc	K	9	SGKYDLDFKSPDDPSR	1	P06733	Alpha-enolase	262	KYDLDFkSPDDPS
Kpyri-pc	T	1	TAIGKAGYTDK	1	P06733	Alpha-enolase	229	GLELLKtAIGKAG
Kpyri-pc	D	1	DVKFGADAR	1	P10809	60 kDa heat shock protein, mitochondrial	29	TRAYAKdVKFGAD
Kpyri-pc	N	3	GANPVEIRR	1	P10809	60 kDa heat shock protein, mitochondrial	136	KISKGAnPVEIRR
Kpyri-pc	K	6	GVITVKDGK	1	P10809	60 kDa heat shock protein, mitochondrial	202	KGVITVkDGKTLN
Kpyri-pc	K	1	KGVITVKDGK	1	P10809	60 kDa heat shock protein, mitochondrial	196	MKKVGRkGVITVK
Kpyri-pc	K	3	LAKLSDGVAVLK	1	P10809	60 kDa heat shock protein, mitochondrial	396	LNERLAkLSDGVA
Kpyri-pc	K	7	IGIEIIKR	2	P10809	60 kDa heat shock protein, mitochondrial	469	IGIEIIkRTLKIP
Kpyri-pc	K	2	LKVGLQVVAVK	3	P10809	60 kDa heat shock protein, mitochondrial	292	LVLNRLkVGLQVV
Kpyri-pc	S	2	ISKGANPVEIRR	1	P10809	60 kDa heat shock protein, mitochondrial	132	EGFEKIsKGANPV
Kpyri-pc	K	5	NIGAKLVQDVANNTNEEAGDGTTTATVLAR	1	P10809	60 kDa heat shock protein, mitochondrial	96	YKNIGAkLVQDVA
Kpyri-pc	S	1	SIAKEGFEK	2	P10809	60 kDa heat shock protein, mitochondrial	122	ATVLARsIAKEGF
Kpyri-pc	K	3	TLKIPAMTIAK	3	P10809	60 kDa heat shock protein, mitochondrial	473	IIKRTLkIPAMTI
Kpyri-pc	K	12	TVIIEQSWGSPKVTK	1	P10809	60 kDa heat shock protein, mitochondrial	72	QSWGSPkVTKDGV
Kpyri-pc	T	2	VTKDGVTVAK	1	P10809	60 kDa heat shock protein, mitochondrial	74	WGSPKVtKDGVTV
Kpyri-pc	K	9	NTDVVATLKK	1	Q7Z4V5	Hepatoma-derived growth factor-related protein 2	524	DVVATLkKIRRYK
Kpyri-pc	K	2	AKIEVSEDGTK	2	P07093	Glia-derived nexin	344	HILQKAkIEVSED
Kpyri-pc	R	13	TIDSWMSIMVPKR	1	P07093	Glia-derived nexin	288	SIMVPKrVQVILP
Kpyri-pc	K	1	KVYDQMPEPR	4	O75251	NADH dehydrogenase [ubiquinone] iron-sulfur protein 7, mitochondrial	136	MAPALRkVYDQMP
Kpyri-pc	Q	3	KVQTESSTGSVGSNR	1	Q9BRX2	Protein pelota homolog	48	STIRKVqTESSTG
Kpyri-pc	K	6	LVDSVKENAGTVR	1	Q9BRX2	Protein pelota homolog	337	RLVDSVkENAGTV
Kpyri-pc	K	7	EAPAPPKAEAK	1	P62750	60S ribosomal protein L23a	14	EAPAPPkAEAKAK
Kpyri-pc	K	1	KLYDIDVAK	1	P62750	60S ribosomal protein L23a	115	IKQAVKkLYDIDV
Kpyri-pc	K	13	LAPDYDALDVANK	3	P62750	60S ribosomal protein L23a	152	ALDVANkIGII
Kpyri-pc	K	8	LYDIDVAKVNTLIRPDGEKK	2	P62750	60S ribosomal protein L23a	123	YDIDVAkVNTLIR
Kpyri-pc	K	2	LKEVFSMAGVVVR	1	P52272	Heterogeneous nuclear ribonucleoprotein M	221	VGWKKLkEVFSMA
Kpyri-pc	K	10	INEILSNALKR	3	P52272	Heterogeneous nuclear ribonucleoprotein M	381	ILSNALkRGEIIA
Kpyri-pc	K	2	VKEDPDGEHAR	1	P52272	Heterogeneous nuclear ribonucleoprotein M	145	GRPLKVkEDPDGE
Kpyri-pc	K	5	MADEKPKEGVKTENNDHINLK	2	P61956	Small ubiquitin-related modifier 2	5	MADEkPKEGVK
Kpyri-pc	E	1	ELQAAQAR	1	P02649	Apolipoprotein E	114	RARLSKeLQAAQA
Kpyri-pc	E	1	EAAKALDKR	1	P25398	40S ribosomal protein S12	37	LARGIReAAKALD
Kpyri-pc	Q	2	KQALQDTLALYK	2	Q01082	Spectrin beta chain, non-erythrocytic 1	843	LTRLRKqALQDTL
Kpyri-pc	Q	2	KQQMLENQMEVR	1	Q01082	Spectrin beta chain, non-erythrocytic 1	1422	NILLKKqQMLENQ
Kpyri-pc	K	8	LVEDMENKIR	1	P47756	F-actin-capping protein subunit beta	223	VEDMENkIRSTLN
Kpyri-pc	K	1	KGVEGLIDIENPNR	1	Q13442	28 kDa heat- and acid-stable phosphoprotein	75	DYQQKRkGVEGLI
Kpyri-pc	Q	3	TEQAKADLAR	1	Q13442	28 kDa heat- and acid-stable phosphoprotein	135	LAGKTEqAKADLA
Kpyri-pc	K	1	KIDYFER	3	Q14152	Eukaryotic translation initiation factor 3 subunit A	694	LKNQEKkIDYFER
Kpyri-pc	N	2	KNLTQDEMQR	1	Q14152	Eukaryotic translation initiation factor 3 subunit A	309	SREMRKnLTQDEM
Kpyri-pc	R	1	RADDDRFPR	2	Q14152	Eukaryotic translation initiation factor 3 subunit A	1151	DDRLSRrADDDRF
Kpyri-pc	K	12	LGNSADALESAKR	2	O96011	Peroxisomal membrane protein 11B	72	DALESAkRAVHLS
Kpyri-pc	K	15	ASAELALGENSEVLKSGR	2	P00505	Aspartate aminotransferase, mitochondrial	122	ENSEVLkSGRFVT
Kpyri-pc	K	1	KAEAQIAAK	1	P00505	Aspartate aminotransferase, mitochondrial	82	VLPSVRkAEAQIA
Kpyri-pc	K	5	MTEYKLVVVGAGGVGK	1	P01112	GTPase HRas	5	MTEYkLVVVGA
Kpyri-pc	K	12	SYGIPYIETSAKTR	3	P01112	GTPase HRas	147	YIETSAkTRQGVE
Kpyri-pc	K	2	VKDSDDVPMVLVGNK	1	P01112	GTPase HRas	104	EQIKRVkDSDDVP
Kpyri-pc	K	11	IEVEKPFAIAKE	1	P23284	Peptidyl-prolyl cis-trans isomerase B	215	KPFAIAkE
Kpyri-pc	K	13	TVDNFVALATGEKGFGYK	3	P23284	Peptidyl-prolyl cis-trans isomerase B	84	ALATGEkGFGYKN
Kpyri-pc	K	18	TVDNFVALATGEKGFGYKNSK	1	P23284	Peptidyl-prolyl cis-trans isomerase B	89	EKGFGYkNSKFHR
Kpyri-pc	K	3	VIKDFMIQGGDFTRGDGTGGK	2	P23284	Peptidyl-prolyl cis-trans isomerase B	98	KFHRVIkDFMIQG
Kpyri-pc	E	3	ALEKLDGTEVNGR	1	Q08170	Serine/arginine-rich splicing factor 4	158	DMKRALeKLDGTE
Kpyri-pc	Q	2	LQASKER	1	Q8TD16	Protein bicaudal D homolog 2	401	SALRRLqASKERQ
Kpyri-pc	K	4	ILSKPIEVQVGGR	1	Q7L014	Probable ATP-dependent RNA helicase DDX46	577	ARRILSkPIEVQV
Kpyri-pc	K	14	EQQLPVNEETLFQKATK	1	Q7Z3K3	Pogo transposable element with ZNF domain	1053	EETLFQkATKIGR
Kpyri-pc	E	1	ELKTDNLPNQAR	1	O95758	Polypyrimidine tract-binding protein 3	135	QYSNHReLKTDNL
Kpyri-pc	K	5	VSFSKSTI	1	O95758	Polypyrimidine tract-binding protein 3	549	LRVSFSkSTI
Kpyri-pc	K	13	GSETDSAQDQPVKMNSLPAER	1	P30419	Glycylpeptide N-tetradecanoyltransferase 1	80	AQDQPVkMNSLPA
Kpyri-pc	T	3	ALTVPELTQQVFDAK	1	P07437	Tubulin beta chain	285	QQYRALtVPELTQ
Kpyri-pc	K	1	KLAVNMVPFPR	7	P07437	Tubulin beta chain	252	LNADLRkLAVNMV
Kpyri-pc	K	12	ISVYYNEATGGKYVPR	5	P07437	Tubulin beta chain	58	NEATGGkYVPRAI
Kpyri-pc	K	4	MSMKEVDEQMLNVQNK	2	P07437	Tubulin beta chain	324	RGRMSMkEVDEQM
Kpyri-pc	E	10	GDLGIEIPAEKVFLAQK	2	P14618	Pyruvate kinase PKM	304	GIEIPAeKVFLAQ
Kpyri-pc	D	2	GDYPLEAVR	2	P14618	Pyruvate kinase PKM	369	GETAKGdYPLEAV
Kpyri-pc	S	2	GSGTAEVELKK	2	P14618	Pyruvate kinase PKM	127	TGLIKGsGTAEVE
Kpyri-pc	K	1	KASDVHEVR	2	P14618	Pyruvate kinase PKM	247	FASFIRkASDVHE
Kpyri-pc	S	3	IISKIENHEGVR	1	P14618	Pyruvate kinase PKM	269	KNIKIIsKIENHE
Kpyri-pc	N	1	NICKVVEVGSK	1	P14618	Pyruvate kinase PKM	163	LWLDYKnICKVVE
Kpyri-pc	K	21	QKGADFLVTEVENGGSLGSKK	1	P14618	Pyruvate kinase PKM	207	GSLGSKkGVNLPG
Kpyri-pc	S	1	SVETLKEMIK	2	P14618	Pyruvate kinase PKM	57	IGPASRsVETLKE
Kpyri-pc	K	5	TGLIKGSGTAEVELK	1	P14618	Pyruvate kinase PKM	125	IRTGLIkGSGTAE
Kpyri-pc	K	15	MAATASAGAGGIDGKPR	2	Q02978	Mitochondrial 2-oxoglutarate/malate carrier protein	15	AGGIDGkPRTSPK
Kpyri-pc	K	1	KSDVETIFSK	1	Q9UKM9	RNA-binding protein Raly	35	NTALVKkSDVETI
Kpyri-pc	K	9	LQASNVTNKNDPK	1	Q9UKM9	RNA-binding protein Raly	13	ASNVTNkNDPKSI
Kpyri-pc	K	9	SDVETIFSKYGR	1	Q9UKM9	RNA-binding protein Raly	44	VETIFSkYGRVAG
Kpyri-pc	K	11	QELILSNSEDKSIR	1	P53621	Coatomer subunit alpha	271	LSNSEDkSIRVWD
Kpyri-pc	K	2	IKMIDMPVER	2	Q15287	RNA-binding protein with serine-rich domain 1	188	STYGKIkMIDMPV
Kpyri-pc	K	7	FAQIVQKGGQ	1	Q9Y5J9	Mitochondrial import inner membrane translocase subunit Tim8 B	80	FAQIVQkGGQ
Kpyri-pc	K	12	MAAQGEPQVQFKLVLVGDGGTGK	1	P62826	GTP-binding nuclear protein Ran	12	EPQVQFkLVLVGD
Kpyri-pc	K	15	DGSLASNPYSGDLTKFGR	1	Q14157	Ubiquitin-associated protein 2-like	864	YSGDLTkFGRGDA
Kpyri-pc	T	3	ALTVPELTQQMFDAK	1	P68371	Tubulin beta-4B chain	285	QQYRALtVPELTQ
Kpyri-pc	K	1	KLAVNMVPFPR	7	P68371	Tubulin beta-4B chain	252	LNADLRkLAVNMV
Kpyri-pc	K	12	INVYYNEATGGKYVPR	1	P68371	Tubulin beta-4B chain	58	NEATGGkYVPRAV
Kpyri-pc	K	4	MSMKEVDEQMLNVQNK	2	P68371	Tubulin beta-4B chain	324	RGRMSMkEVDEQM
Kpyri-pc	K	11	MADKTPGGSQKASSK	1	O15042	U2 snRNP-associated SURP motif-containing protein	11	TPGGSQkASSKTR
Kpyri-pc	K	8	SPDTILQKDTR	1	P20042	Eukaryotic translation initiation factor 2 subunit 2	293	PDTILQkDTRLYF
Kpyri-pc	K	2	AKEFTNVYIK	1	P11940	Polyadenylate-binding protein 1	188	ELGARAkEFTNVY
Kpyri-pc	K	11	ALDTMNFDVIKGKPVR	2	P11940	Polyadenylate-binding protein 1	78	MNFDVIkGKPVRI
Kpyri-pc	E	2	KEFSPFGTITSAK	1	P11940	Polyadenylate-binding protein 1	313	DERLRKeFSPFGT
Kpyri-pc	K	1	KFEQMKQDR	1	P11940	Polyadenylate-binding protein 1	279	QTELKRkFEQMKQ
Kpyri-pc	N	1	NLDKSIDNK	1	P11940	Polyadenylate-binding protein 1	105	GNIFIKnLDKSID
Kpyri-pc	N	3	GANLKDYYSR	1	Q08211	ATP-dependent RNA helicase A	144	TWDRGAnLKDYYS
Kpyri-pc	K	1	KMTPSYEIR	2	Q08211	ATP-dependent RNA helicase A	16	AWCGKRkMTPSYE
Kpyri-pc	K	4	ILAKLPIEPR	3	Q08211	ATP-dependent RNA helicase A	857	LGRILAkLPIEPR
Kpyri-pc	S	2	KSYGVENR	1	Q8NFJ5	Retinoic acid-induced protein 3	292	PQLVKKsYGVENR
Kpyri-pc	K	2	LKEEYQSLIR	1	Q9Y3C8	Ubiquitin-fold modifier-conjugating enzyme 1	33	LWVQRLkEEYQSL
Kpyri-pc	K	2	AKGILFVGSGVSGGEEGAR	1	P52209	6-phosphogluconate dehydrogenase, decarboxylating	119	CRDLKAkGILFVG
Kpyri-pc	K	10	AEAESMYQIKYEELQSLAGK	3	P05787	Keratin, type II cytoskeletal 8	285	ESMYQIkYEELQS
Kpyri-pc	K	2	AKQDMAR	3	P05787	Keratin, type II cytoskeletal 8	364	AALQRAkQDMARQ
Kpyri-pc	K	19	ASLEAAIADAEQRGELAIKDANAK	1	P05787	Keratin, type II cytoskeletal 8	347	RGELAIkDANAKL
Kpyri-pc	D	1	DGKLVSESSDVLPK	2	P05787	Keratin, type II cytoskeletal 8	470	KKIETRdGKLVSE
Kpyri-pc	K	9	DVDEAYMNKVELESR	3	P05787	Keratin, type II cytoskeletal 8	207	DEAYMNkVELESR
Kpyri-pc	K	7	FLEQQNKMLETK	2	P05787	Keratin, type II cytoskeletal 8	117	FLEQQNkMLETKW
Kpyri-pc	E	2	GELAIKDANAK	1	P05787	Keratin, type II cytoskeletal 8	343	DAEQRGeLAIKDA
Kpyri-pc	Y	7	GGLGGGYGGASGMGGITAVTVNQSLLSPLVLEVDPNIQAVR	1	P05787	Keratin, type II cytoskeletal 8	54	GGLGGGyGGASGM
Kpyri-pc	D	2	KDVDEAYMNKVELESR	3	P05787	Keratin, type II cytoskeletal 8	199	FVLIKKdVDEAYM
Kpyri-pc	K	1	KLLEGEESR	12	P05787	Keratin, type II cytoskeletal 8	393	EIATYRkLLEGEE
Kpyri-pc	K	9	LQAEIEGLKGQR	4	P05787	Keratin, type II cytoskeletal 8	325	AEIEGLkGQRASL
Kpyri-pc	S	2	ISSSSFSR	2	P05787	Keratin, type II cytoskeletal 8	34	GPGSRIsSSSFSR
Kpyri-pc	E	3	MLETKWSLLQQQK	3	P05787	Keratin, type II cytoskeletal 8	120	QQNKMLeTKWSLL
Kpyri-pc	K	5	MLETKWSLLQQQK	1	P05787	Keratin, type II cytoskeletal 8	122	NKMLETkWSLLQQ
Kpyri-pc	T	2	RTKTEISEMNR	1	P05787	Keratin, type II cytoskeletal 8	303	GDDLRRtKTEISE
Kpyri-pc	K	12	SLDMDSIIAEVKAQYEDIANR	2	P05787	Keratin, type II cytoskeletal 8	264	SIIAEVkAQYEDI
Kpyri-pc	S	1	SYTSGPGSR	1	P05787	Keratin, type II cytoskeletal 8	24	RAFSSRsYTSGPG
Kpyri-pc	K	5	TLNNKFASFIDK	2	P05787	Keratin, type II cytoskeletal 8	101	IKTLNNkFASFID
Kpyri-pc	K	12	TLNNKFASFIDKVR	3	P05787	Keratin, type II cytoskeletal 8	108	FASFIDkVRFLEQ
Kpyri-pc	T	1	TQEKEQIK	1	P05787	Keratin, type II cytoskeletal 8	89	NIQAVRtQEKEQI
Kpyri-pc	T	2	VTQKSYK	1	P05787	Keratin, type II cytoskeletal 8	6	MSIRVtQKSYKV
Kpyri-pc	K	8	WSLLQQQKTAR	1	P05787	Keratin, type II cytoskeletal 8	130	SLLQQQkTARSNM
Kpyri-pc	K	10	YEELQSLAGKHGDDLRR	2	P05787	Keratin, type II cytoskeletal 8	295	LQSLAGkHGDDLR
Kpyri-pc	K	8	GIVEFSGKPAAR	1	Q15233	Non-POU domain-containing octamer-binding protein	198	IVEFSGkPAARKA
Kpyri-pc	K	5	MQSNKTFNLEK	1	Q15233	Non-POU domain-containing octamer-binding protein	5	MQSNkTFNLEK
Kpyri-pc	K	2	GKPTEASIEAR	3	Q9NVU7	Protein SDA1 homolog	454	QKKFRGkPTEASI
Kpyri-pc	K	8	MAAQSAPKVVLK	1	Q9Y3Y2	Chromatin target of PRMT1 protein	8	AAQSAPkVVLKST
Kpyri-pc	Q	4	MGVQVETISPGDGR	4	P62942	Peptidyl-prolyl cis-trans isomerase FKBP1A	4	MGVqVETISP
Kpyri-pc	E	7	MKHYEVEILDAK	1	Q9NZ01	Very-long-chain enoyl-CoA reductase	7	MKHYEVeILDAKT
Kpyri-pc	D	6	MNVLADALKSINNAEKR	1	P62244	40S ribosomal protein S15a	9	RMNVLAdALKSIN
Kpyri-pc	R	16	IGDFGLVTSLKNDGKR	1	P19525	Interferon-induced, double-stranded RNA-activated protein kinase	445	LKNDGKrTRSKGT
Kpyri-pc	K	2	AKDANNGNLQLR	1	P05455	Lupus La protein	287	EALGKAkDANNGN
Kpyri-pc	K	3	AGKITFAEK	1	P02786	Transferrin receptor protein 1	261	VIVRAGkITFAEK
Kpyri-pc	K	12	IIDSLFNTVTDKK	1	O60701	UDP-glucose 6-dehydrogenase	329	FNTVTDkKIAILG
Kpyri-pc	K	5	YKEAKESFQR	1	O75400	Pre-mRNA-processing factor 40 homolog A	464	SKYKEAkESFQRF
Kpyri-pc	K	22	LLDFGSLSNLQVTQPTVGMNFKTPR	1	P08708	40S ribosomal protein S17	129	TVGMNFkTPRGPV
Kpyri-pc	K	5	VIIEKYYTR	1	P08708	40S ribosomal protein S17	19	ARVIIEkYYTRLG
Kpyri-pc	K	3	AVKDATNTGIK	2	P50579	Methionine aminopeptidase 2	281	TLLKAVkDATNTG
Kpyri-pc	H	4	MPAHLLQDDISSSYTTTTTITAPPSR	1	O00767	Acyl-CoA desaturase	4	MPAhLLQDDI
Kpyri-pc	K	1	KYNELLK	1	P10909	Clusterin	340	AERLTRkYNELLK
Kpyri-pc	T	1	TLIEKTNEER	1	P10909	Clusterin	58	GVKQIKtLIEKTN
Kpyri-pc	K	1	KILIEDWK	1	P14314	Glucosidase 2 subunit beta	142	EGFRLKkILIEDW
Kpyri-pc	T	3	KATVNLLGEEKK	1	Q00765	Receptor expression-enhancing protein 5	178	KEAKKAtVNLLGE
Kpyri-pc	S	2	ISAKEMQR	1	Q9BRK5	45 kDa calcium-binding protein	119	NTDRKIsAKEMQR
Kpyri-pc	K	10	VADISGDTQKAK	1	Q7KZF4	Staphylococcal nuclease domain-containing protein 1	513	ISGDTQkAKQFLP
Kpyri-pc	E	2	VEKVESPAK	1	Q7KZF4	Staphylococcal nuclease domain-containing protein 1	751	WYRARVeKVESPA
Kpyri-pc	K	13	VITEYLNAQESAKSAR	3	Q7KZF4	Staphylococcal nuclease domain-containing protein 1	886	NAQESAkSARLNL
Kpyri-pc	S	2	MSEKSVEAAAELSAK	1	P20962	Parathymosin	2	MsEKSVEA
Kpyri-pc	K	11	AHATTSNTVSKLLEK	1	Q6NZI2	Caveolae-associated protein 1	109	TSNTVSkLLEKVR
Kpyri-pc	E	3	KLEVNEAELLR	1	Q6NZI2	Caveolae-associated protein 1	139	GQIKKLeVNEAEL
Kpyri-pc	K	1	KSFTPDHVVYAR	1	Q6NZI2	Caveolae-associated protein 1	299	SRDKLRkSFTPDH
Kpyri-pc	Y	4	VMIYQDEVKLPAK	1	Q6NZI2	Caveolae-associated protein 1	156	NFKVMIyQDEVKL
Kpyri-pc	K	10	SAVTTVVNPKYEGK	1	P05556	Integrin beta-1	794	TTVVNPkYEGK
Kpyri-pc	K	9	IEANEALVKALE	1	P30049	ATP synthase subunit delta, mitochondrial	165	ANEALVkALE
Kpyri-pc	K	3	GLKVDLAQR	1	Q1KMD3	Heterogeneous nuclear ribonucleoprotein U-like protein 2	26	LDSRGLkVDLAQR
Kpyri-pc	K	2	LKVTELR	1	Q1KMD3	Heterogeneous nuclear ribonucleoprotein U-like protein 2	7	MEVKRLkVTELRS
Kpyri-pc	S	1	SLEDTKNR	1	P35527	Keratin, type I cytoskeletal 9	397	KAALEKsLEDTKN
Kpyri-pc	K	11	ASLENSLEETKGR	1	P08779	Keratin, type I cytoskeletal 16	365	NSLEETkGRYCMQ
Kpyri-pc	K	7	LASYLDKVR	1	P08779	Keratin, type I cytoskeletal 16	134	LASYLDkVRALEE
Kpyri-pc	K	11	QQQQQQNDVVKLTK	2	Q15286	Ras-related protein Rab-35	189	QQNDVVkLTKNSK
Kpyri-pc	K	2	VKLQIWDTAGQER	1	Q15286	Ras-related protein Rab-35	58	INGEKVkLQIWDT
Kpyri-pc	K	11	IGSGTYGDVYKAR	1	Q8IVH8	Mitogen-activated protein kinase kinase kinase kinase 3	32	TYGDVYkARNVNT
Kpyri-pc	K	15	MSDAAVDTSSEITTKDLK	1	P06454	Prothymosin alpha	15	SSEITTkDLKEKK
Kpyri-pc	K	8	TQDLPGVKLTVVR	1	O15235	28S ribosomal protein S12, mitochondrial	122	QDLPGVkLTVVRG
Kpyri-pc	K	9	MEKTELIQKAK	2	P27348	14-3-3 protein theta	9	KTELIQkAKLAEQ
Kpyri-pc	K	2	MKGDYFR	2	P27348	14-3-3 protein theta	122	VFYLKMkGDYFRY
Kpyri-pc	K	11	IGQGTFGEVFKAR	1	P50750	Cyclin-dependent kinase 9	35	TFGEVFkARHRKT
Kpyri-pc	K	9	MADLSELLKEGTK	1	P30519	Heme oxygenase 2	38	DLSELLkEGTKEA
Kpyri-pc	K	13	YMGDLSGGQVLKK	1	P30519	Heme oxygenase 2	169	GGQVLKkVAQRAL
Kpyri-pc	K	1	KILDSVGIEADDDRLNK	1	P05387	60S acidic ribosomal protein P2	25	SAKDIKkILDSVG
Kpyri-pc	K	1	KAFANPEDALR	2	O14684	Prostaglandin E synthase	42	QVRLRKkAFANPE
Kpyri-pc	N	6	KKAFANPEDALR	1	O14684	Prostaglandin E synthase	46	RKKAFAnPEDALR
Kpyri-pc	K	6	IFYDMKVR	1	P60981	Destrin	19	RIFYDMkVRKCST
Kpyri-pc	K	9	QAELAQWQKVLPR	1	Q9Y2R0	Cytochrome c oxidase assembly factor 3 homolog, mitochondrial	48	ELAQWQkVLPRRR
Kpyri-pc	E	1	EIKSQQSEVTR	1	Q9H299	SH3 domain-binding glutamic acid-rich-like protein 3	16	SVTGSReIKSQQS
Kpyri-pc	K	6	ISEAVKR	1	P30838	Aldehyde dehydrogenase, dimeric NADP-preferring	9	KISEAVkRARAAF
Kpyri-pc	K	3	MSKISEAVKR	2	P30838	Aldehyde dehydrogenase, dimeric NADP-preferring	3	MSkISEAVK
Kpyri-pc	K	3	SLKEFYGEDAKK	2	P30838	Aldehyde dehydrogenase, dimeric NADP-preferring	269	KLKKSLkEFYGED
Kpyri-pc	K	9	LSPEDYTLKVSQAGK	1	P07339	Cathepsin D	357	PEDYTLkVSQAGK
Kpyri-pc	T	1	TVKGGFSETR	2	Q9H4G0	Band 4.1-like protein 1	814	TTHVTKtVKGGFS
Kpyri-pc	K	1	KVEQLQQEYTEMK	1	Q14258	E3 ubiquitin/ISG15 ligase TRIM25	237	RMTANRkVEQLQQ
Kpyri-pc	K	14	SINDNIAIFTEVQKR	1	Q07065	Cytoskeleton-associated protein 4	260	IFTEVQkRSQKEI
Kpyri-pc	S	2	MSKSESPKEPEQLR	1	P09651	Heterogeneous nuclear ribonucleoprotein A1	2	MsKSESPK
Kpyri-pc	S	3	SESPKEPEQLR	2	P09651	Heterogeneous nuclear ribonucleoprotein A1	6	MSKSEsPKEPEQ
Kpyri-pc	K	14	SSGPYGGGGQYFAKPR	1	P09651	Heterogeneous nuclear ribonucleoprotein A1	350	GGQYFAkPRNQGG
Kpyri-pc	K	1	KLVGYLDR	2	P07602	Prosaposin	414	FCEVCKkLVGYLD
Kpyri-pc	K	9	ASGAQLEAKVR	1	Q9BVC6	Transmembrane protein 109	215	GAQLEAkVRGLER
Kpyri-pc	K	2	GKEDALVTK	1	P22087	rRNA 2'-O-methyltransferase fibrillarin	102	VFICRGkEDALVT
Kpyri-pc	K	12	NLVPGESVYGEKR	2	P22087	rRNA 2'-O-methyltransferase fibrillarin	121	ESVYGEkRVSISE
Kpyri-pc	K	9	VSISEGDDKIEYR	1	P22087	rRNA 2'-O-methyltransferase fibrillarin	131	ISEGDDkIEYRAW
Kpyri-pc	Y	5	ALVAYYQKYVDEASKK	1	P62249	40S ribosomal protein S16	95	SKALVAyYQKYVD
Kpyri-pc	E	1	EIKDILIQYDR	1	P62249	40S ribosomal protein S16	107	DEASKKeIKDILI
Kpyri-pc	K	10	LLEPVLLLGKER	2	P62249	40S ribosomal protein S16	60	PVLLLGkERFAGV
Kpyri-pc	S	3	MPSKGPLQSVQVFGR	1	P62249	40S ribosomal protein S16	3	MPsKGPLQS
Kpyri-pc	Y	2	MYKEEGLK	1	Q00325	Phosphate carrier protein, mitochondrial	208	DAAPKMyKEEGLK
Kpyri-pc	Y	3	IQYAKTDSDIISK	1	P08579	U2 small nuclear ribonucleoprotein B''	83	KPMRIQyAKTDSD
Kpyri-pc	K	8	TDSDIISKMR	1	P08579	U2 small nuclear ribonucleoprotein B''	93	DSDIISkMRGTFA
Kpyri-pc	K	3	VTKVLGR	1	P62857	40S ribosomal protein S28	16	KLARVTkVLGRTG
Kpyri-pc	K	1	KLTELGTVDPK	1	P46940	Ras GTPase-activating-like protein IQGAP1	1465	IQTGLKkLTELGT
Kpyri-pc	K	8	LTDTLVSKQQLEQR	1	Q86UP2	Kinectin	543	TDTLVSkQQLEQR
Kpyri-pc	K	2	AKQDMAR	3	P13647	Keratin, type II cytoskeletal 5	443	EALQKAkQDMARL
Kpyri-pc	K	5	TLNNKFASFIDK	2	P13647	Keratin, type II cytoskeletal 5	178	IKTLNNkFASFID
Kpyri-pc	K	12	TLNNKFASFIDKVR	3	P13647	Keratin, type II cytoskeletal 5	185	FASFIDkVRFLEQ
Kpyri-pc	K	7	SVLISLKQAPLVH	2	P09496	Clathrin light chain A	242	SVLISLkQAPLVH
Kpyri-pc	K	2	AKTNADTDGMVK	2	P09622	Dihydrolipoyl dehydrogenase, mitochondrial	430	AANSRAkTNADTD
Kpyri-pc	T	4	NQVTATKADGGTQVIDTK	1	P09622	Dihydrolipoyl dehydrogenase, mitochondrial	163	TGKNQVtATKADG
Kpyri-pc	K	2	VKESMQMQVEAER	1	Q9UJZ1	Stomatin-like protein 2, mitochondrial	187	HVPPRVkESMQMQ
Kpyri-pc	K	4	TGGKEAASGTTPQK	1	Q13428	Treacle protein	1263	SPKTGGkEAASGT
Kpyri-pc	Q	16	AAMDNSEIAGEKKSAQWR	1	Q16891	MICOS complex subunit MIC60	273	GEKKSAqWRTVEG
Kpyri-pc	K	1	KVQAAQSEAK	1	Q16891	MICOS complex subunit MIC60	344	LDNVVKkVQAAQS
Kpyri-pc	K	2	MKSVIENAK	2	Q16891	MICOS complex subunit MIC60	306	EELEKMkSVIENA
Kpyri-pc	S	2	LSGKEINGR	1	Q13243	Serine/arginine-rich splicing factor 5	165	NAIEKLsGKEING
Kpyri-pc	K	6	SVDQVKAQLR	1	O43505	Beta-1,4-glucuronyltransferase 1	60	RSVDQVkAQLRTA
Kpyri-pc	K	9	FTEYETQVKVMSQR	3	Q13148	TAR DNA-binding protein 43	160	EYETQVkVMSQRH
Kpyri-pc	Q	8	AKDQTKAQAAAPASVPAQAPK	1	P47914	60S ribosomal protein L29	136	KDQTKAqAAAPAS
Kpyri-pc	K	7	MQANNAKAMSAR	1	P47914	60S ribosomal protein L29	63	MQANNAkAMSARA
Kpyri-pc	K	6	TQAPTKASE	1	P47914	60S ribosomal protein L29	156	RTQAPTkASE
Kpyri-pc	K	7	MAGTALKR	1	P60604	Ubiquitin-conjugating enzyme E2 G2	7	MAGTALkRLMAEY
Kpyri-pc	K	7	EAELNAKAQR	2	Q02818	Nucleobindin-1	364	EAELNAkAQRLSQ
Kpyri-pc	K	10	LQAANAEDIKSGK	1	Q02818	Nucleobindin-1	81	ANAEDIkSGKLSR

## Sheet: Table S6-KP13
1248 Modified Lysine sites by 100 mM KP13 from 500 mg Hela cell lysates
Modification Name	Target Amino Acid	Position in Peptide	Peptide Sequence	Modified PSMs	Protein Accession	Protein Description	Position	Motif
stp_pc	H	6	NILEKHSLDASQGTATGPR	1	O00330	Pyruvate dehydrogenase protein X component, mitochondrial	195	RNILEKhSLDASQ
stp_pc	K	5	DQALKALR	4	P45974	Ubiquitin carboxyl-terminal hydrolase 5	743	SRDQALkALRATN
stp_pc	K	8	AAQEEYVKR	1	P04075	Fructose-bisphosphate aldolase A	330	AQEEYVkRALANS
stp_pc	K	12	ADDGRPFPQVIKSK	3	P04075	Fructose-bisphosphate aldolase A	99	PFPQVIkSKGGVV
stp_pc	K	4	ENLKAAQEEYVKR	1	P04075	Fructose-bisphosphate aldolase A	322	GKKENLkAAQEEY
stp_pc	S	11	GILAADESTGSIAK	3	P04075	Fructose-bisphosphate aldolase A	39	ADESTGsIAKRLQ
stp_pc	R	15	GILAADESTGSIAKR	11	P04075	Fructose-bisphosphate aldolase A	43	TGSIAKrLQSIGT
stp_pc	K	1	KELSDIAHR	1	P04075	Fructose-bisphosphate aldolase A	14	LTPEQKkELSDIA
stp_pc	K	6	IVAPGKGILAADESTGSIAK	12	P04075	Fructose-bisphosphate aldolase A	28	RIVAPGkGILAAD
stp_pc	K	20	IVAPGKGILAADESTGSIAKR	5	P04075	Fructose-bisphosphate aldolase A	42	STGSIAkRLQSIG
stp_pc	Y	3	MPYQYPALTPEQK	17	P04075	Fructose-bisphosphate aldolase A	3	MPyQYPALT
stp_pc	Y	22	YTPSGQAGAAASESLFVSNHAY	6	P04075	Fructose-bisphosphate aldolase A	364	FVSNHAy
stp_pc	K	6	WQAIYKQFDTDR	1	P04632	Calpain small subunit 1	179	RWQAIYkQFDTDR
stp_pc	S	2	MSPTPPLFSLPEAR	3	Q96FV9	THO complex subunit 1	2	MsPTPPLF
stp_pc	K	12	FLIPNASQAESKVFYLK	1	P63104	14-3-3 protein zeta/delta	115	ASQAESkVFYLKM
stp_pc	K	9	MDKNELVQKAK	3	P63104	14-3-3 protein zeta/delta	9	KNELVQkAKLAEQ
stp_pc	K	8	NLLSVAYKNVVGAR	5	P63104	14-3-3 protein zeta/delta	49	LLSVAYkNVVGAR
stp_pc	S	1	SVTEQGAELSNEER	1	P63104	14-3-3 protein zeta/delta	28	MAACMKsVTEQGA
stp_pc	T	1	TEGAEKKQQMAR	1	P63104	14-3-3 protein zeta/delta	69	SSIEQKtEGAEKK
stp_pc	K	5	VFYLKMK	6	P63104	14-3-3 protein zeta/delta	120	SKVFYLkMKGDYY
stp_pc	K	8	VVSSIEQKTEGAEK	5	P63104	14-3-3 protein zeta/delta	68	VSSIEQkTEGAEK
stp_pc	K	8	NGDLDEVKDYVAKGEDVNR	1	P58546	Myotrophin	19	GDLDEVkDYVAKG
stp_pc	K	3	AVKAALADDFDTPR	1	Q9HA77	Probable cysteine--tRNA ligase, mitochondrial	407	STKRAVkAALADD
stp_pc	K	3	SGKKLEDNPK	1	Q05639	Elongation factor 1-alpha 2	385	IDRRSGkKLEDNP
stp_pc	K	4	TIEKFEKEAAEMGK	1	Q05639	Elongation factor 1-alpha 2	41	DKRTIEkFEKEAA
stp_pc	S	8	AAVPSGASTGIYEALELR	2	P13929	Beta-enolase	40	AVPSGAsTGIYEA
stp_pc	K	5	MAMQKIFAR	1	P13929	Beta-enolase	5	MAMQkIFAREI
stp_pc	K	7	MQESQTKSMFVSR	1	Q9Y6D5	Brefeldin A-inhibited guanine nucleotide-exchange protein 2	7	MQESQTkSMFVSR
stp_pc	K	3	AFKALIAAQYSGAQVR	2	P26641	Elongation factor 1-gamma	17	ENWRAFkALIAAQ
stp_pc	K	6	AFNQGKIFK	3	P26641	Elongation factor 1-gamma	434	KAFNQGkIFK
stp_pc	K	2	AKDPFAHLPK	4	P26641	Elongation factor 1-gamma	277	AAEPKAkDPFAHL
stp_pc	K	1	KFAETQPK	1	P26641	Elongation factor 1-gamma	220	AQFDAKkFAETQP
stp_pc	E	6	MPGIVELPTLEELKVDEVK	1	P51970	NADH dehydrogenase [ubiquinone] 1 alpha subcomplex subunit 8	6	MPGIVeLPTLEE
stp_pc	S	3	KLSTIALALGVER	1	P30154	Serine/threonine-protein phosphatase 2A 65 kDa regulatory subunit A beta isoform	48	NSIKKLsTIALAL
stp_pc	K	9	LVQTAELTKVFEIR	2	O60234	Glia maturation factor gamma	119	QTAELTkVFEIRT
stp_pc	K	1	KLLENSTLNSK	3	Q9Y6I4	Ubiquitin carboxyl-terminal hydrolase 3	135	DRHKKRkLLENST
stp_pc	Q	2	KQLLHLAEEK	1	Q00341	Vigilin	715	VEKAKKqLLHLAE
stp_pc	K	1	KFAENLK	4	Q16836	Hydroxyacyl-coenzyme A dehydrogenase, mitochondrial	81	RKVAKKkFAENLK
stp_pc	S	1	SFSSSAEEHS	1	Q96EQ0	Small glutamine-rich tetratricopeptide repeat-containing protein beta	295	NHIRSRsFSSSAE
stp_pc	S	6	FIDTTSK	1	P39023	60S ribosomal protein L3	372	KFIDTTsKFGHGR
stp_pc	K	7	FQTMEEKK	1	P39023	60S ribosomal protein L3	385	FQTMEEkKAFMGP
stp_pc	K	8	IGQGYLIKDGK	3	P39023	60S ribosomal protein L3	294	GQGYLIkDGKLIK
stp_pc	K	7	ARENIQKSLAGSSGPGASSGTSGDHGELVVR	2	P29692	Elongation factor 1-delta	59	ARENIQkSLAGSS
stp_pc	S	13	FYEQMNGPVAGASR	1	P29692	Elongation factor 1-delta	37	GPVAGAsRQENGA
stp_pc	S	10	IASLEVENQSLR	3	P29692	Elongation factor 1-delta	93	LEVENQsLRGVVQ
stp_pc	N	2	LNVLEKSSPGHR	1	P29692	Elongation factor 1-delta	113	KLEARLnVLEKSS
stp_pc	T	3	MATNFLAHEK	11	P29692	Elongation factor 1-delta	3	MAtNFLAHE
stp_pc	S	6	SLAGSSGPGASSGTSGDHGELVVR	1	P29692	Elongation factor 1-delta	65	KSLAGSsGPGASS
stp_pc	K	6	ATIELKALR	2	P51532	Transcription activator BRG1	405	KATIELkALRLLN
stp_pc	K	1	KADNVVNIAR	1	Q92621	Nuclear pore complex protein Nup205	892	INPRTKkADNVVN
stp_pc	H	2	KHFVGYPTNSDFELK	1	Q14914	Prostaglandin reductase 1	12	TWTLKKhFVGYPT
stp_pc	K	10	VVGAVGSDEKVAYLQK	1	Q14914	Prostaglandin reductase 1	178	AVGSDEkVAYLQK
stp_pc	K	5	LLNLKNDSLR	3	Q15631	Translin	187	FRLLNLkNDSLRK
stp_pc	K	7	DLMTDLKSEISGDLAR	1	P08133	Annexin A6	418	DLMTDLkSEISGD
stp_pc	K	2	AKEAAEQDVEK	1	P26373	60S ribosomal protein L13	200	IRAKRAkEAAEQD
stp_pc	K	11	EAAEQDVEKKK	1	P26373	60S ribosomal protein L13	211	QDVEKKk
stp_pc	K	10	KGDSSAEELKLATQLTGPVMPVR	1	P26373	60S ribosomal protein L13	145	SSAEELkLATQLT
stp_pc	K	7	VITEEEKNFK	1	P26373	60S ribosomal protein L13	174	VITEEEkNFKAFA
stp_pc	K	10	VITEEEKNFKAFASLR	2	P26373	60S ribosomal protein L13	177	EEEKNFkAFASLR
stp_pc	H	1	HAKWFQAR	3	Q12906	Interleukin enhancer-binding factor 3	212	ALASLRhAKWFQA
stp_pc	K	6	LHVAVKVLQDMGLPTGAEGR	7	Q12906	Interleukin enhancer-binding factor 3	460	KLHVAVkVLQDMG
stp_pc	K	7	LQEEITKQSPTLQR	1	P54578	Ubiquitin carboxyl-terminal hydrolase 14	300	LQEEITkQSPTLQ
stp_pc	K	2	GKPLMLNPR	6	P23368	NAD-dependent malic enzyme, mitochondrial	26	HIKEKGkPLMLNP
stp_pc	Y	3	YIYIMGIQER	2	P23368	NAD-dependent malic enzyme, mitochondrial	84	PLEKYIyIMGIQE
stp_pc	K	2	AKQEELEAALQR	6	P08729	Keratin, type II cytoskeletal 7	353	LKDARAkQEELEA
stp_pc	K	7	FASFIDKVR	3	P08729	Keratin, type II cytoskeletal 7	108	FASFIDkVRFLEQ
stp_pc	K	10	FETLQAQAGKHGDDLR	1	P08729	Keratin, type II cytoskeletal 7	296	LQAQAGkHGDDLR
stp_pc	K	1	KLLEGEESR	6	P08729	Keratin, type II cytoskeletal 7	394	EIATYRkLLEGEE
stp_pc	D	2	LDADPSLQR	1	P08729	Keratin, type II cytoskeletal 7	79	LAPLRLdADPSLQ
stp_pc	K	5	LLETKWTLLQEQK	1	P08729	Keratin, type II cytoskeletal 7	122	NKLLETkWTLLQE
stp_pc	S	2	MSIHFSSPVFTSR	1	P08729	Keratin, type II cytoskeletal 7	2	MsIHFSSP
stp_pc	S	1	SAYGGPVGAGIR	1	P08729	Keratin, type II cytoskeletal 7	53	PRVAVRsAYGGPV
stp_pc	S	1	SLDLDGIIAEVK	1	P08729	Keratin, type II cytoskeletal 7	254	SMDNSRsLDLDGI
stp_pc	K	7	EIAQDFKTDLR	2	P84243	Histone H3.3	80	EIAQDFkTDLRFQ
stp_pc	S	1	STELLIR	1	P84243	Histone H3.3	58	IRRYQKsTELLIR
stp_pc	K	6	VTIMPKDIQLAR	2	P84243	Histone H3.3	123	RVTIMPkDIQLAR
stp_pc	K	7	MSVAGLKK	1	Q99961	Endophilin-A2	7	MSVAGLkKQFYKA
stp_pc	K	3	QGKIPDEELR	1	Q99961	Endophilin-A2	177	KKKRQGkIPDEEL
stp_pc	K	2	AKEQLEIR	2	Q06481	Amyloid beta precursor like protein 2	394	ARFQKAkEQLEIR
stp_pc	S	1	SAAASNLSGLSLQEAQQILNVSK	1	Q9Y3D7	Mitochondrial import inner membrane translocase subunit TIM16	45	GRAGHRsAAASNL
stp_pc	K	2	LKAADIDQEVKER	4	Q86VP6	Cullin-associated NEDD8-dissociated protein 1	577	CTIKRLkAADIDQ
stp_pc	K	19	LLGPDAAINLTDPDGALAKR	1	Q13561	Dynactin subunit 2	175	PDGALAkRLLLQL
stp_pc	K	3	TIKLQIWDTAGQER	2	P62820	Ras-related protein Rab-1A	61	LDGKTIkLQIWDT
stp_pc	K	2	IKTLFPLIEAK	1	P13010	X-ray repair cross-complementing protein 5	534	IPLSKIkTLFPLI
stp_pc	K	6	MSVFGKLFGAGGGK	1	Q9H444	Charged multivesicular body protein 4b	6	MSVFGkLFGAGG
stp_pc	T	1	TFIAIKPDGVQR	3	P15531	Nucleoside diphosphate kinase A	7	MANCERtFIAIKP
stp_pc	K	12	VMLGETNPADSKPGTIR	4	P15531	Nucleoside diphosphate kinase A	100	TNPADSkPGTIRG
stp_pc	S	3	MASQSQGIQQLLQAEKR	2	O95670	V-type proton ATPase subunit G 2	3	MAsQSQGIQ
stp_pc	K	2	GKAVVLMGK	2	P05388	60S acidic ribosomal protein P0	50	RMSLRGkAVVLMG
stp_pc	K	17	VLALSVETDYTFPLAEKVK	1	P05388	60S acidic ribosomal protein P0	264	TFPLAEkVKAFLA
stp_pc	K	12	ELISNASDALDKIR	1	P14625	Endoplasmin	114	ASDALDkIRLISL
stp_pc	T	2	KTFEINPR	1	P14625	Endoplasmin	684	YASQKKtFEINPR
stp_pc	K	1	KIQNDAGVR	1	Q96AE4	Far upstream element-binding protein 1	300	NGEMIKkIQNDAG
stp_pc	K	7	ITGDPYKVQQAK	1	Q96AE4	Far upstream element-binding protein 1	243	ITGDPYkVQQAKE
stp_pc	S	1	SGVISGGASDLK	3	Q14683	Structural maintenance of chromosomes protein 1A	649	GTLFQKsGVISGG
stp_pc	K	5	ATDLKNLFSK	1	Q15424	Scaffold attachment factor B1	423	TRATDLkNLFSKY
stp_pc	K	8	MAEYSYVKSTK	1	Q14331	Protein FRG1	8	AEYSYVkSTKLVL
stp_pc	K	6	ATGDWKGLR	1	P30050	60S ribosomal protein L12	54	KATGDWkGLRITV
stp_pc	T	7	IGIIGGTGLDDPEILEGR	5	Q13126	S-methyl-5'-thioadenosine phosphorylase	18	IGIIGGtGLDDPE
stp_pc	S	3	MASGTTTTAVK	3	Q13126	S-methyl-5'-thioadenosine phosphorylase	3	MAsGTTTTA
stp_pc	Q	1	QLIEKAEALR	1	P58107	Epiplakin	1996	FQAMQKqLIEKAE
stp_pc	E	2	KETPPPLVPPAAR	1	Q9BQA1	Methylosome protein 50	4	MRKeTPPPLV
stp_pc	K	23	DIGEGNLSTAAAAALAAAAVKAK	1	Q8TAQ2	SWI/SNF complex subunit SMARCC2	874	AAAVKAkHLAAVE
stp_pc	K	4	MASKEMFEDTVEER	1	Q16576	Histone-binding protein RBBP7	4	MASkEMFEDT
stp_pc	K	2	GKATISNDGATILK	3	Q99832	T-complex protein 1 subunit eta	55	IVDGRGkATISND
stp_pc	K	2	IKEIAVTVK	3	Q99832	T-complex protein 1 subunit eta	137	LAVNKIkEIAVTV
stp_pc	K	4	MEVKPPPGRPQPDSGR	2	P51991	Heterogeneous nuclear ribonucleoprotein A3	4	MEVkPPPGRP
stp_pc	H	2	AHSGAQGLLAAQK	1	Q9Y2Z4	Tyrosine--tRNA ligase, mitochondrial	32	LGLRKAhSGAQGL
stp_pc	E	1	EGLDSAKR	1	Q9Y2Z4	Tyrosine--tRNA ligase, mitochondrial	361	KLVHGReGLDSAK
stp_pc	K	1	KVLPLEEAYR	5	Q9H223	EH domain-containing protein 4	35	RSLYLRkVLPLEE
stp_pc	K	4	LDHKFDLMYAK	10	A6NHL2	Tubulin alpha chain-like 3	401	WARLDHkFDLMYA
stp_pc	D	2	LDHKFDLMYAK	7	A6NHL2	Tubulin alpha chain-like 3	399	EAWARLdHKFDLM
stp_pc	K	9	MASAELQGKYQK	1	Q6ZMI0	Protein phosphatase 1 regulatory subunit 21	9	SAELQGkYQKLAQ
stp_pc	S	2	MSAFSEAALEK	7	Q96P16	Regulation of nuclear pre-mRNA domain-containing protein 1A	2	MsAFSEAA
stp_pc	K	12	VIGQDSSEIHFKVK	2	P63165	Small ubiquitin-related modifier 1	37	SSEIHFkVKMTTH
stp_pc	Q	3	MGQNDLMGTAEDFADQFLR	2	O15260	Surfeit locus protein 4	3	MGqNDLMGT
stp_pc	K	7	MSGGLLKALR	2	P52298	Nuclear cap-binding protein subunit 2	7	MSGGLLkALRSDS
stp_pc	D	3	KLDLISELR	2	Q2M389	WASH complex subunit 4	588	VVMKKLdLISELR
stp_pc	K	3	MAKVEQVLSLEPQHELK	1	O95292	Vesicle-associated membrane protein-associated protein B/C	3	MAkVEQVLS
stp_pc	K	35	MSHVAVENALGLDQQFAGLDLNSSDNQSGGSTASKGR	1	O00571	ATP-dependent RNA helicase DDX3X	35	GGSTASkGRYIPP
stp_pc	K	4	AVLKFAAATGATPIAGR	8	P08865	40S ribosomal protein SA	89	GQRAVLkFAAATG
stp_pc	K	10	SDGIYIINLKR	1	P08865	40S ribosomal protein SA	52	IYIINLkRTWEKL
stp_pc	T	2	MTGSNEFKLNQPPEDGISSVK	3	O43684	Mitotic checkpoint protein BUB3	2	MtGSNEFK
stp_pc	K	10	MNGQLDLSGKLIIK	2	Q92734	Protein TFG	10	QLDLSGkLIIKAQ
stp_pc	K	6	AETAAKHGEAQVK	6	P18669	Phosphoglycerate mutase 1	106	KAETAAkHGEAQV
stp_pc	H	14	FSGWYDADLSPAGHEEAKR	2	P18669	Phosphoglycerate mutase 1	35	DLSPAGhEEAKRG
stp_pc	K	10	HYGGLTGLNKAETAAK	1	P18669	Phosphoglycerate mutase 1	100	GLTGLNkAETAAK
stp_pc	K	1	KAMEAVAAQGK	1	P18669	Phosphoglycerate mutase 1	241	DEETVRkAMEAVA
stp_pc	K	5	MAAYKLVLIR	7	P18669	Phosphoglycerate mutase 1	5	MAAYkLVLIRH
stp_pc	N	7	MPMFIVNTNVPR	28	P14174	Macrophage migration inhibitory factor	7	MPMFIVnTNVPRA
stp_pc	K	9	FLNAENAQKFK	9	P43487	Ran-specific GTPase-activating protein	150	NAENAQkFKTKFE
stp_pc	S	1	SGLEKR	2	Q9H8W3	Protein FAM204A	152	RKKVEKsGLEKRI
stp_pc	K	16	MELIQDTSRPPLEYVKGVPLIK	1	P0DMN0	Sulfotransferase 1A4	16	PPLEYVkGVPLIK
stp_pc	D	1	DIDTAAK	4	P05496	ATP synthase F(0) complex subunit C1, mitochondrial	62	TSVVSRdIDTAAK
stp_pc	H	2	KHPDSSVNFAEFSK	12	P26583	High mobility group protein B2	31	EEHKKKhPDSSVN
stp_pc	K	1	KLGEMWSEQSAK	7	P26583	High mobility group protein B2	128	IGDTAKkLGEMWS
stp_pc	S	1	SEHPGLSIGDTAK	1	P26583	High mobility group protein B2	115	HRPKIKsEHPGLS
stp_pc	K	3	YEKDIAAYR	1	P26583	High mobility group protein B2	157	LKEKYEkDIAAYR
stp_pc	K	6	TSLGPKGMDK	1	P50991	T-complex protein 1 subunit delta	55	RTSLGPkGMDKMI
stp_pc	K	11	ALDEGDIALLKTYGQSTYSR	2	P35998	26S proteasome regulatory subunit 7	34	GDIALLkTYGQST
stp_pc	D	3	MPDYLGADQR	5	P35998	26S proteasome regulatory subunit 7	3	MPdYLGADQ
stp_pc	K	5	DEGGKAFFK	2	P12236	ADP/ATP translocase 3	268	FRDEGGkAFFKGA
stp_pc	K	13	DFLAGGIAAAISKTAVAPIER	2	P12236	ADP/ATP translocase 3	23	IAAAISkTAVAPI
stp_pc	T	2	ITKSDGIR	1	P12236	ADP/ATP translocase 3	165	DCLVKItKSDGIR
stp_pc	K	10	MTEQAISFAKDFLAGGIAAAISK	1	P12236	ADP/ATP translocase 3	10	QAISFAkDFLAGG
stp_pc	K	2	VKLLLQVQHASK	3	P12236	ADP/ATP translocase 3	33	APIERVkLLLQVQ
stp_pc	K	3	GAKSDPSIVR	1	P61601	Neurocalcin-delta	174	EFIRGAkSDPSIV
stp_pc	S	2	MSAPLDAALHALQEEQAR	1	P80217	Interferon-induced 35 kDa protein	2	MsAPLDAA
stp_pc	S	1	SFVLNLGK	8	P09382	Galectin-1	30	VAPDAKsFVLNLG
stp_pc	S	9	DGQVINETSQHHDDLE	2	P08670	Vimentin	459	QVINETsQHHDDL
stp_pc	K	1	KLLEGEESR	6	P08670	Vimentin	402	EIATYRkLLEGEE
stp_pc	K	10	ILLAELEQLKGQGK	5	P08670	Vimentin	139	AELEQLkGQGKSR
stp_pc	K	9	LQDEIQNMKEEMAR	3	P08670	Vimentin	373	DEIQNMkEEMARH
stp_pc	Y	3	QQYESVAAK	2	P08670	Vimentin	276	RDVRQQyESVAAK
stp_pc	S	1	SLYASSPGGVYATR	1	P08670	Vimentin	51	RPSTSRsLYASSP
stp_pc	K	5	TLLIKTVETR	8	P08670	Vimentin	445	KRTLLIkTVETRD
stp_pc	K	2	MKGTFVER	5	P09012	U1 small nuclear ribonucleoprotein A	98	DIIAKMkGTFVER
stp_pc	Y	14	ASAETVDPASLWEY	1	Q16658	Fascin	493	PASLWEy
stp_pc	K	1	KVTGTLDANR	1	Q16658	Fascin	399	GFIGCRkVTGTLD
stp_pc	K	9	VNASASSLKK	1	Q16658	Fascin	41	ASASSLkKKQIWT
stp_pc	Q	1	QAWQKADINTK	1	P50914	60S ribosomal protein L14	75	HQKYVRqAWQKAD
stp_pc	K	12	ADLINNLGTIAKSGTK	9	P07900	Heat shock protein HSP 90-alpha	112	NLGTIAkSGTKAF
stp_pc	H	2	KHLEINPDHSIIETLR	2	P07900	Heat shock protein HSP 90-alpha	633	YMAAKKhLEINPD
stp_pc	K	3	IMKAQALR	2	P07900	Heat shock protein HSP 90-alpha	615	NMERIMkAQALRD
stp_pc	K	1	KVPQVSTPTLVEVSR	6	P02768	Albumin	438	LVRYTKkVPQVST
stp_pc	K	7	ADGIVSKNF	1	P63220	40S ribosomal protein S21	81	ADGIVSkNF
stp_pc	K	3	LAKADGIVSK	3	P63220	40S ribosomal protein S21	74	SILRLAkADGIVS
stp_pc	T	12	AQQVSQGLDVLTAKVENAAR	1	P18206	Vinculin	364	QGLDVLtAKVENA
stp_pc	K	5	VFYLKMK	6	P31947	14-3-3 protein sigma	122	SRVFYLkMKGDYY
stp_pc	K	1	KIRLDTETEGVPSTAIR	2	P24941	Cyclin-dependent kinase 2	34	EVVALKkIRLDTE
stp_pc	K	11	IGEGTYGVVYKAR	11	P24941	Cyclin-dependent kinase 2	20	TYGVVYkARNKLT
stp_pc	K	9	LTGEVVALKK	5	P24941	Cyclin-dependent kinase 2	33	GEVVALkKIRLDT
stp_pc	K	6	MENFQKVEK	4	P24941	Cyclin-dependent kinase 2	6	MENFQkVEKIGE
stp_pc	K	11	MTMDKSELVQKAK	7	P31946	14-3-3 protein beta/alpha	11	KSELVQkAKLAEQ
stp_pc	K	8	NLLSVAYKNVVGAR	5	P31946	14-3-3 protein beta/alpha	51	LLSVAYkNVVGAR
stp_pc	K	5	VFYLKMK	6	P31946	14-3-3 protein beta/alpha	122	SKVFYLkMKGDYF
stp_pc	K	8	VISSIEQKTER	4	P31946	14-3-3 protein beta/alpha	70	ISSIEQkTERNEK
stp_pc	T	9	VISSIEQKTERNEK	1	P31946	14-3-3 protein beta/alpha	71	SSIEQKtERNEKK
stp_pc	K	2	IKGSEADRQR	1	P56192	Methionine--tRNA ligase, cytoplasmic	729	EPWKRIkGSEADR
stp_pc	S	5	QPQPSPAEGR	1	P56192	Methionine--tRNA ligase, cytoplasmic	209	QKQPQPsPAEGRA
stp_pc	K	17	TAVDSGIPLLTNFQVTKLFAEAVQK	1	P31327	Carbamoyl-phosphate synthase [ammonia], mitochondrial	1471	TNFQVTkLFAEAV
stp_pc	K	15	AEEYEFLTPVEEAPKGMLAR	1	P52565	Rho GDP-dissociation inhibitor 1	167	PVEEAPkGMLARG
stp_pc	K	6	QSFVLKEGVEYR	1	P52565	Rho GDP-dissociation inhibitor 1	105	KQSFVLkEGVEYR
stp_pc	N	3	MPNIVLFSGSSHQDLSQR	1	P11908	Ribose-phosphate pyrophosphokinase 2	3	MPnIVLFSG
stp_pc	K	18	MASGADSKGDDLSTAILKQK	3	P55072	Transitional endoplasmic reticulum ATPase	18	LSTAILkQKNRPN
stp_pc	N	3	MPNSEPASLLELFNSIATQGELVR	1	P23381	Tryptophan--tRNA ligase, cytoplasmic	3	MPnSEPASL
stp_pc	S	8	MSASDPNSSIFLTDTAK	2	P23381	Tryptophan--tRNA ligase, cytoplasmic	357	SASDPNsSIFLTD
stp_pc	D	5	MSASDPNSSIFLTDTAK	1	P23381	Tryptophan--tRNA ligase, cytoplasmic	354	TKMSASdPNSSIF
stp_pc	K	17	MSASDPNSSIFLTDTAKQIK	4	P23381	Tryptophan--tRNA ligase, cytoplasmic	366	FLTDTAkQIKTKV
stp_pc	S	1	SLKAGNASKDEIDSAVK	2	P23381	Tryptophan--tRNA ligase, cytoplasmic	25	QGELVRsLKAGNA
stp_pc	K	8	LGGVIKEK	1	Q9Y2X3	Nucleolar protein 58	101	GGVIKEkLNLSCI
stp_pc	S	1	STEPELIQVK	1	Q15758	Neutral amino acid transporter B(0)	493	DRTESRsTEPELI
stp_pc	K	7	LNLYELKEGR	7	P49720	Proteasome subunit beta type-3	77	LNLYELkEGRQIK
stp_pc	K	2	LKTPGVDAPSWLEEQ	2	P53367	Arfaptin-1	360	QFHIKLkTPGVDA
stp_pc	K	7	SEVDMLKIR	7	A6NMY6	Putative annexin A2-like protein	302	SEVDMLkIRSEFK
stp_pc	K	2	AKWDAWNALGSLPK	1	O75521	Enoyl-CoA delta isomerase 2	92	DLINKAkWDAWNA
stp_pc	K	1	KLFVQDLATR	6	P33176	Kinesin-1 heavy chain	801	TLHNLRkLFVQDL
stp_pc	S	1	SQTEAVTFLANHDDSR	5	Q9Y2S7	Polymerase delta-interacting protein 2	150	PHISQRsQTEAVT
stp_pc	K	10	MSGRVPLAEKALSEGYAR	2	A0A1B0GUI7	Putative uncharacterized protein BRD3OS	10	RVPLAEkALSEGY
stp_pc	K	10	IAGQVAAANKK	1	P39019	40S ribosomal protein S19	143	QVAAANkKH
stp_pc	K	22	AASADSTTEGTPADGFTVLSTKSLFLGQK	1	O75367	Core histone macro-H2A.1	189	FTVLSTkSLFLGQ
stp_pc	S	8	QFMNKSLSGPGQ	1	O15145	Actin-related protein 2/3 complex subunit 3	174	FMNKSLsGPGQ
stp_pc	K	9	MHSEAEESKEVATDVFNSK	1	O95379	Tumor necrosis factor alpha-induced protein 8	9	SEAEESkEVATDV
stp_pc	E	4	MVMEKPSPLLVGR	7	Q13283	Ras GTPase-activating protein-binding protein 1	4	MVMeKPSPLL
stp_pc	D	4	QKADEAYLIGR	2	P11498	Pyruvate carboxylase, mitochondrial	81	MHRQKAdEAYLIG
stp_pc	T	1	TSTAPAASPNVR	1	P11498	Pyruvate carboxylase, mitochondrial	19	LLGIRRtSTAPAA
stp_pc	K	10	AQLGGPEAAKSDETAAK	1	P04792	Heat shock protein beta-1	198	GGPEAAkSDETAA
stp_pc	Y	2	KYTLPPGVDPTQVSSSLSPEGTLTVEAPMPK	2	P04792	Heat shock protein beta-1	142	RCFTRKyTLPPGV
stp_pc	Q	1	QLSSGVSEIR	5	P04792	Heat shock protein beta-1	80	SRALSRqLSSGVS
stp_pc	Y	7	MELSAEYLR	1	Q9H3K6	BolA-like protein 2	7	MELSAEyLREKLQ
stp_pc	E	2	KETEFLR	4	Q9Y2H1	Serine/threonine-protein kinase 38-like	74	SQHARKeTEFLRL
stp_pc	K	4	ATIKDASLQPR	1	Q9Y508	E3 ubiquitin-protein ligase RNF114	126	GVKATIkDASLQP
stp_pc	K	13	AVDIPHMDIEALKK	2	P62906	60S ribosomal protein L10a	91	MDIEALkKLNKNK
stp_pc	K	8	AAEQYTPKAK	1	P49327	Fatty acid synthase	2436	AEQYTPkAKYHGN
stp_pc	K	6	EGVFAKEVR	12	P49327	Fatty acid synthase	673	KEGVFAkEVRTGG
stp_pc	K	4	YFEKAGLK	1	P25815	Protein S100-P	91	CHKYFEkAGLK
stp_pc	K	4	AVPKEDIYSGGGGGGSR	1	Q13151	Heterogeneous nuclear ribonucleoprotein A0	176	VKKAVPkEDIYSG
stp_pc	K	6	ADVVPKTAENFR	2	P30405	Peptidyl-prolyl cis-trans isomerase F, mitochondrial	73	KADVVPkTAENFR
stp_pc	K	6	VVLELKADVVPK	1	P30405	Peptidyl-prolyl cis-trans isomerase F, mitochondrial	67	RVVLELkADVVPK
stp_pc	K	4	AVTKYTSSK	1	Q5QNW6	Histone H2B type 2-F	121	GTKAVTkYTSSK
stp_pc	K	8	HAVSEGTKAVTK	1	Q5QNW6	Histone H2B type 2-F	117	AVSEGTkAVTKYT
stp_pc	E	2	KESYSVYVYK	2	Q5QNW6	Histone H2B type 2-F	36	RKRSRKeSYSVYV
stp_pc	K	9	LLLPGELAKHAVSEGTK	8	Q5QNW6	Histone H2B type 2-F	109	LPGELAkHAVSEG
stp_pc	D	3	MPDPAKSAPAPK	5	Q5QNW6	Histone H2B type 2-F	3	MPdPAKSAP
stp_pc	K	6	MPDPAKSAPAPK	1	Q5QNW6	Histone H2B type 2-F	6	MPDPAkSAPAPK
stp_pc	K	3	VLKQVHPDTGISSK	2	Q5QNW6	Histone H2B type 2-F	47	YVYKVLkQVHPDT
stp_pc	S	4	MALSAETESHIYR	2	O14569	Transmembrane reductase CYB561D2	4	MALsAETESH
stp_pc	K	11	IGEGTYGTVFKAK	2	Q00535	Cyclin-dependent kinase 5	20	TYGTVFkAKNRET
stp_pc	Q	4	LYAQYFQGDLK	1	Q15118	[Pyruvate dehydrogenase (acetyl-transferring)] kinase isozyme 1, mitochondrial	367	ISRLYAqYFQGDL
stp_pc	Y	4	MGLYAAAAGVLAGVESR	1	Q96P11	28S rRNA (cytosine-C(5))-methyltransferase	4	MGLyAAAAGV
stp_pc	K	1	KLGSSLDWDR	4	P26640	Valine--tRNA ligase	433	IYHQLKkLGSSLD
stp_pc	S	1	SSAQDPQAVLGALGR	1	P26640	Valine--tRNA ligase	123	PALGLRsSAQDPQ
stp_pc	K	1	KIEISQHAK	1	P61513	60S ribosomal protein L37a	28	LRKMVKkIEISQH
stp_pc	S	12	LEVGTETIIDKSK	1	Q01581	Hydroxymethylglutaryl-CoA synthase, cytoplasmic	101	ETIIDKsKSVKTN
stp_pc	S	2	MSVPAFIDISEEDQAAELR	1	Q7L2H7	Eukaryotic translation initiation factor 3 subunit M	2	MsVPAFID
stp_pc	K	11	AANGVVLATEKK	2	P25787	Proteasome subunit alpha type-2	50	VVLATEkKQKSIL
stp_pc	Q	10	VGQAVDVVGQAGKPK	1	Q13200	26S proteasome non-ATPase regulatory subunit 2	855	AVDVVGqAGKPKT
stp_pc	K	2	VKPQVSESKL	1	O14734	Acyl-coenzyme A thioesterase 8	311	EGVIRVkPQVSES
stp_pc	E	3	EKELETGPK	2	Q14247	Src substrate cortactin	73	QTLKEKeLETGPK
stp_pc	K	2	FKDPGLVDQLVK	2	P49591	Serine--tRNA ligase, cytoplasmic	28	TQEKRFkDPGLVD
stp_pc	K	12	MAADTQVSETLKR	1	Q92616	eIF-2-alpha kinase activator GCN1	12	QVSETLkRFAGKV
stp_pc	K	10	LGLSTLGELKQNLSR	2	O43399	Tumor protein D54	90	STLGELkQNLSRS
stp_pc	K	3	MIKLFSLK	3	P61081	NEDD8-conjugating enzyme Ubc12	3	MIkLFSLKQ
stp_pc	K	3	SGKFVFSFK	1	P61081	NEDD8-conjugating enzyme Ubc12	75	GFYKSGkFVFSFK
stp_pc	K	9	ASQLVGIEKK	4	Q9NPD8	Ubiquitin-conjugating enzyme E2 T	191	QLVGIEkKFHPDV
stp_pc	K	10	AAPEMVSLLKR	3	Q92947	Glutaryl-CoA dehydrogenase, mitochondrial	371	EMVSLLkRNNCGK
stp_pc	S	11	AITGIQAFTASK	1	Q92947	Glutaryl-CoA dehydrogenase, mitochondrial	437	IQAFTAsK
stp_pc	N	3	IVNLGSSKTDLFYER	1	Q7RTV0	PHD finger-like domain-containing protein 5A	90	GCPKIVnLGSSKT
stp_pc	K	7	EGVMVAKK	1	P46783	40S ribosomal protein S10	24	EGVMVAkKDVHMP
stp_pc	K	1	KAEAGAGSATEFQFR	1	P46783	40S ribosomal protein S10	139	PPGADKkAEAGAG
stp_pc	K	5	GVAVKVEEPR	2	Q9BQ69	ADP-ribose glycohydrolase MACROD1	138	AKGVAVkVEEPRY
stp_pc	K	6	MALDVKSR	2	P50613	Cyclin-dependent kinase 7	6	MALDVkSRAKRY
stp_pc	Y	6	MAGYEYVSPEQLAGFDKYK	1	Q9C0D9	Ethanolaminephosphotransferase 1	6	MAGYEyVSPEQL
stp_pc	S	11	NQYDNDVTVWSPQGR	2	P25786	Proteasome subunit alpha type-1	14	NDVTVWsPQGRIH
stp_pc	K	8	IVAEEFLKNF	1	P59998	Actin-related protein 2/3 complex subunit 4	166	VAEEFLkNF
stp_pc	N	3	MGNIIPLNVPR	4	P51589	Cytochrome P450 2J2	374	EVQRMGnIIPLNV
stp_pc	K	3	GMKGLVYETSVLDPDEGIR	21	O75390	Citrate synthase, mitochondrial	76	GGMRGMkGLVYET
stp_pc	S	4	MAPSVPAAEPEYPK	2	P54819	Adenylate kinase 2, mitochondrial	4	MAPsVPAAEP
stp_pc	D	3	QLDDLKVELSQLR	3	P42766	60S ribosomal protein L35	22	ELLKQLdDLKVEL
stp_pc	K	3	VAKVTGGAASK	2	P42766	60S ribosomal protein L35	35	SQLRVAkVTGGAA
stp_pc	K	8	VTGGAASKLSK	1	P42766	60S ribosomal protein L35	43	TGGAASkLSKIRV
stp_pc	K	4	IAAKFIIHAPPGEFNEVFNDVR	2	P47755	F-actin-capping protein subunit alpha-2	19	KVRIAAkFIIHAP
stp_pc	S	2	MSGFSTEER	1	Q15181	Inorganic pyrophosphatase	2	MsGFSTEE
stp_pc	K	7	STHDHWKALVTK	1	Q15181	Inorganic pyrophosphatase	228	STHDHWkALVTKK
stp_pc	S	7	MAAAEPSPR	1	Q53H96	Pyrroline-5-carboxylate reductase 3	7	MAAAEPsPRRVGF
stp_pc	K	1	KVFIEDVSR	2	P00966	Argininosuccinate synthase	58	LKLGAKkVFIEDV
stp_pc	K	4	LQSKVTAK	1	P00966	Argininosuccinate synthase	408	YHRLQSkVTAK
stp_pc	K	6	TQDPAKAPNTPDILEIEFK	3	P00966	Argininosuccinate synthase	215	KTQDPAkAPNTPD
stp_pc	K	4	MAPKFPDSVEELR	2	Q15785	Mitochondrial import receptor subunit TOM34	4	MAPkFPDSVE
stp_pc	S	11	TVLQIDDNVTSAVEGINR	4	Q15785	Mitochondrial import receptor subunit TOM34	120	IDDNVTsAVEGIN
stp_pc	K	7	IVYLYTKK	2	P49207	60S ribosomal protein L34	36	IVYLYTkKVGKAP
stp_pc	K	3	VLKAQAQSQK	1	P49207	60S ribosomal protein L34	108	IVVKVLkAQAQSQ
stp_pc	K	15	DGDFENPVPYTGAVKVGAIQR	4	P30040	Endoplasmic reticulum resident protein 29	137	PYTGAVkVGAIQR
stp_pc	K	1	KLSSETYSQAK	3	Q08J23	RNA cytosine C(5)-methyltransferase NSUN2	640	ENPFFRkLSSETY
stp_pc	K	11	NVLLNNSEKMK	1	Q08J23	RNA cytosine C(5)-methyltransferase NSUN2	579	NNSEKMkVINTGI
stp_pc	K	2	GKLDDYQER	3	Q14444	Caprin-1	74	LEKKKGkLDDYQE
stp_pc	D	4	INPDEREEMKVSAK	1	P48507	Glutamate--cysteine ligase regulatory subunit	84	VEKINPdEREEMK
stp_pc	K	9	AISFVGSNKAGEYIFER	1	Q02252	Methylmalonate-semialdehyde dehydrogenase [acylating], mitochondrial	264	SFVGSNkAGEYIF
stp_pc	Y	33	AEVNGLAAQGKYEGSGEDGGAAAQSLYIANHAY	2	P09972	Fructose-bisphosphate aldolase C	364	YIANHAy
stp_pc	R	15	GILAADESVGSMAKR	2	P09972	Fructose-bisphosphate aldolase C	43	VGSMAKrLSQIGV
stp_pc	K	7	GVVVLAKSYNEQR	5	P52895	Aldo-keto reductase family 1 member C2	270	GVVVLAkSYNEQR
stp_pc	Y	2	MYPESTTGSPAR	1	Q13303	Voltage-gated potassium channel subunit beta-2	2	MyPESTTG
stp_pc	K	10	QADVNLVNAKLLVK	2	O43175	D-3-phosphoglycerate dehydrogenase	394	VNLVNAkLLVKEA
stp_pc	K	10	FAAQELIEVKR	1	Q86U44	N6-adenosine-methyltransferase catalytic subunit	132	QELIEVkRGLLQD
stp_pc	S	1	STAYEDYYYHPPPR	3	O43390	Heterogeneous nuclear ribonucleoprotein R	428	ARQASRsTAYEDY
stp_pc	K	25	YGGPPPDSVYSGVQPGIGTEVFVGKIPR	1	O43390	Heterogeneous nuclear ribonucleoprotein R	171	TEVFVGkIPRDLY
stp_pc	K	9	MVDQAIWSKK	2	Q9H981	Actin-related protein 8	120	DQAIWSkKMSNGT
stp_pc	K	1	KIGLETVGVK	2	Q16881	Thioredoxin reductase 1, cytoplasmic	449	RDACTRkIGLETV
stp_pc	K	6	QFVPIKVEQIEAGTPGR	1	Q16881	Thioredoxin reductase 1, cytoplasmic	405	RQFVPIkVEQIEA
stp_pc	S	2	KSLDFYTR	1	Q04760	Lactoylglutathione lyase	45	VKDPKKsLDFYTR
stp_pc	K	21	NGTQVHGTITGVDVSMNTHLKAVK	1	P62314	Small nuclear ribonucleoprotein Sm D1	41	SMNTHLkAVKMTL
stp_pc	K	1	KLGQSESQGPPR	2	O00233	26S proteasome non-ATPase regulatory subunit 9	123	KEAMSRkLGQSES
stp_pc	K	9	MAAPSDGFKPR	1	Q92979	Ribosomal RNA small subunit methyltransferase NEP1	9	APSDGFkPRERSG
stp_pc	E	2	AELIKTHHNDTELIR	2	P49915	GMP synthase [glutamine-hydrolyzing]	386	VASGKAeLIKTHH
stp_pc	K	1	KIIGDTFVK	5	P49915	GMP synthase [glutamine-hydrolyzing]	338	SPEEKRkIIGDTF
stp_pc	Y	1	YGMDKQTGR	1	Q96JH7	Deubiquitinating protein VCPIP1	137	SPILARyGMDKQT
stp_pc	K	1	KGLTPSQIGVILR	4	P62277	40S ribosomal protein S13	43	IYKLAKkGLTPSQ
stp_pc	K	7	LTSDDVKEQIYK	5	P62277	40S ribosomal protein S13	34	LTSDDVkEQIYKL
stp_pc	K	12	LTSDDVKEQIYKLAK	3	P62277	40S ribosomal protein S13	39	VKEQIYkLAKKGL
stp_pc	K	3	QLKAEVIAK	2	P43246	DNA mismatch repair protein Msh2	912	IKLKQLkAEVIAK
stp_pc	K	11	IGEGTYGVVYKGR	13	P06493	Cyclin-dependent kinase 1	20	TYGVVYkGRHKTT
stp_pc	K	6	MEDYTKIEK	3	P06493	Cyclin-dependent kinase 1	6	MEDYTkIEKIGE
stp_pc	Y	4	DDGYSTKDSYSSR	1	P38159	RNA-binding motif protein, X chromosome	214	SPRDDGySTKDSY
stp_pc	K	9	MVEADRPGKLFIGGLNTETNEK	3	P38159	RNA-binding motif protein, X chromosome	9	EADRPGkLFIGGL
stp_pc	S	1	SDLYSSGRDR	1	P38159	RNA-binding motif protein, X chromosome	332	SYSSSRsDLYSSG
stp_pc	K	3	TAKVLVEDTK	3	Q9Y490	Talin-1	2024	GILKTAkVLVEDT
stp_pc	T	1	TVKAVEDEATKGTR	2	Q9Y490	Talin-1	2131	VTSLLKtVKAVED
stp_pc	K	6	AMELLKVSK	14	Q9Y3U8	60S ribosomal protein L36	62	RAMELLkVSKDKR
stp_pc	S	2	MSTNENANTPAAR	2	P52292	Importin subunit alpha-1	2	MsTNENAN
stp_pc	K	2	IKLQIWDTAGQER	0	P61106	Ras-related protein Rab-14	61	VSGQKIkLQIWDT
stp_pc	K	1	KGEITGEVR	3	P21333	Filamin-A	1801	IPFTIKkGEITGE
stp_pc	K	7	TGVAVNKPAEFTVDAK	1	P21333	Filamin-A	691	TGVAVNkPAEFTV
stp_pc	K	2	VKAFGPGLQGGSAGSPAR	1	P21333	Filamin-A	1071	TKPSKVkAFGPGL
stp_pc	K	5	VQGPKGLVEPVDVVDNADGTQTVNYVPSR	1	P21333	Filamin-A	1491	VKVQGPkGLVEPV
stp_pc	K	11	VSGSQIVDIDKR	1	P60520	Gamma-aminobutyric acid receptor-associated protein-like 2	46	QIVDIDkRKYLVP
stp_pc	K	1	KIFEYETQR	6	P50402	Emerin	37	RRLYEKkIFEYET
stp_pc	Y	14	DLEKPFLLPVEAVYSVPGR	1	P49411	Elongation factor Tu, mitochondrial	269	LPVEAVySVPGRG
stp_pc	K	9	ILAEGGGAKFK	6	P49411	Elongation factor Tu, mitochondrial	91	AEGGGAkFKKYEE
stp_pc	K	10	VEAQVYILSKEEGGR	1	P49411	Elongation factor Tu, mitochondrial	364	QVYILSkEEGGRH
stp_pc	E	5	MPFLELDTNLPANR	25	P30046	D-dopachrome decarboxylase	5	MPFLeLDTNLP
stp_pc	K	4	MAGKQAVSASGK	1	P14927	Cytochrome b-c1 complex subunit 7	4	MAGkQAVSAS
stp_pc	T	21	MAAAVLSGPSAGSAAGVPGGTGGLSAVSSGPR	1	Q8IZL8	Proline-, glutamic acid- and leucine-rich protein 1	21	AGVPGGtGGLSAV
stp_pc	K	7	NAEEFTKK	2	A0A1B0GUS4	Ubiquitin-conjugating enzyme E2 L5	145	NAEEFTkKYGEKR
stp_pc	S	9	VLAQQGEYSEAIPILR	5	Q14318	Peptidyl-prolyl cis-trans isomerase FKBP8	323	AQQGEYsEAIPIL
stp_pc	K	3	AIKLAANDFFR	8	Q9H1K4	Mitochondrial glutamate carrier 2	82	TPEKAIkLAANDF
stp_pc	K	10	IIGVDINKDKFAR	3	P11766	Alcohol dehydrogenase class-3	228	VDINKDkFARAKE
stp_pc	Y	11	MSGFDDPGIFYSDSFGGDAQADEGQAR	1	P33992	DNA replication licensing factor MCM5	11	DDPGIFySDSFGG
stp_pc	K	5	SQLLKFVEK	2	P33992	DNA replication licensing factor MCM5	392	AKSQLLkFVEKCS
stp_pc	S	1	SSIPITVR	1	P33992	DNA replication licensing factor MCM5	604	RDSDRRsSIPITV
stp_pc	K	26	MATDSWALAVDEQEAAAESLSNLHLKEEK	1	Q9UMR2	ATP-dependent RNA helicase DDX19B	26	LSNLHLkEEKIKP
stp_pc	K	12	AADFIDQALAQKNGR	1	P51452	Dual specificity protein phosphatase 3	116	DQALAQkNGRVLV
stp_pc	K	14	IYVGNASVAQDIPKLQK	3	P51452	Dual specificity protein phosphatase 3	50	VAQDIPkLQKLGI
stp_pc	Y	3	MVYISNGQVLDSR	1	Q9Y6D0	Selenoprotein K	3	MVyISNGQV
stp_pc	K	5	GAGSKTLQQNAESR	2	O95816	BAG family molecular chaperone regulator 2	200	SKGAGSkTLQQNA
stp_pc	K	8	IIDEVVNKFLDDLGNAK	1	O95816	BAG family molecular chaperone regulator 2	123	IDEVVNkFLDDLG
stp_pc	E	3	LLEHSKGAGSK	1	O95816	BAG family molecular chaperone regulator 2	192	KAIKLLeHSKGAG
stp_pc	K	4	INAKANEGR	1	O95816	BAG family molecular chaperone regulator 2	9	QAKINAkANEGRF
stp_pc	K	5	MAQAKINAK	1	O95816	BAG family molecular chaperone regulator 2	5	MAQAkINAKAN
stp_pc	T	1	TLQQNAESR	5	O95816	BAG family molecular chaperone regulator 2	201	KGAGSKtLQQNAE
stp_pc	K	9	DETEFYLGKR	1	P18077	60S ribosomal protein L35a	45	TEFYLGkRCAYVY
stp_pc	K	1	KLEDVKNSPTFK	6	P55327	Tumor protein D52	164	GSVITKkLEDVKN
stp_pc	K	5	SFEEKVENLK	3	P55327	Tumor protein D52	180	FKSFEEkVENLKS
stp_pc	D	1	DIKDTTVGTLSQR	3	P51665	26S proteasome non-ATPase regulatory subunit 7	178	VEHLLRdIKDTTV
stp_pc	E	3	MPELAVQK	5	P51665	26S proteasome non-ATPase regulatory subunit 7	3	MPeLAVQKV
stp_pc	K	5	ATVPKTEIR	3	P62847	40S ribosomal protein S24	37	GKATVPkTEIREK
stp_pc	K	12	VADWTGATYQDKR	2	O15371	Eukaryotic translation initiation factor 3 subunit D	53	GATYQDkRYTNKY
stp_pc	Y	1	YHVKDSSR	1	O15371	Eukaryotic translation initiation factor 3 subunit D	455	LGYVSRyHVKDSS
stp_pc	K	6	MQIFVKTLTGK	6	P62979	Ubiquitin-40S ribosomal protein S27a	6	MQIFVkTLTGKT
stp_pc	K	5	TLTGKTITLEVEPSDTIENVK	2	P62979	Ubiquitin-40S ribosomal protein S27a	11	VKTLTGkTITLEV
stp_pc	Y	1	YYKVDENGK	1	P62979	Ubiquitin-40S ribosomal protein S27a	105	KLAVLKyYKVDEN
stp_pc	K	7	EAVLLLKK	5	P36578	60S ribosomal protein L4	172	EAVLLLkKLKAWN
stp_pc	K	3	ILKSPEIQR	15	P36578	60S ribosomal protein L4	294	DLSRILkSPEIQR
stp_pc	K	3	DNKQAGVFEPTIVK	1	P17987	T-complex protein 1 subunit alpha	499	GKPRDNkQAGVFE
stp_pc	K	6	IDDLIKLHPESK	2	P17987	T-complex protein 1 subunit alpha	532	RIDDLIkLHPESK
stp_pc	K	12	LGVQVVITDPEKLDQIR	4	P17987	T-complex protein 1 subunit alpha	259	VITDPEkLDQIRQ
stp_pc	K	23	SLLVIPNTLAVNAAQDSTDLVAKLR	1	P17987	T-complex protein 1 subunit alpha	466	STDLVAkLRAFHN
stp_pc	D	1	DALSQLMNGPIR	1	Q9HB40	Retinoid-inducible serine carboxypeptidase	307	VRHLQRdALSQLM
stp_pc	Q	1	QFVKDSIR	2	P60059	Protein transport protein Sec61 subunit gamma	13	FVEPSRqFVKDSI
stp_pc	K	1	KVLQSPATTVVR	1	Q8TCS8	Polyribonucleotide nucleotidyltransferase 1, mitochondrial	750	RMRLSRkVLQSPA
stp_pc	K	8	MAASLVGKK	1	Q9BY32	Inosine triphosphate pyrophosphatase	8	AASLVGkKIVFVT
stp_pc	E	1	ELHEAYKNAR	1	Q9UPQ0	LIM and calponin homology domains-containing protein 1	425	KERREReLHEAYK
stp_pc	K	1	KADIDLTK	2	P62269	40S ribosomal protein S18	47	AHVVLRkADIDLT
stp_pc	K	8	MSLVIPEKFQHILR	1	P62269	40S ribosomal protein S18	8	SLVIPEkFQHILR
stp_pc	K	4	FAAKELSR	5	Q7LBR1	Charged multivesicular body protein 1b	16	NLKFAAkELSRSA
stp_pc	E	5	MSNMEKHLFNLK	1	Q7LBR1	Charged multivesicular body protein 1b	5	MSNMeKHLFNL
stp_pc	K	8	GAYGVVEKMR	3	P52564	Dual specificity mitogen-activated protein kinase kinase 6	69	AYGVVEkMRHVPS
stp_pc	K	4	FAQKIGGSER	1	P21291	Cysteine and glycine-rich protein 1	112	ASKFAQkIGGSER
stp_pc	K	5	NFGPKGFGFGQGAGALVHSE	3	P21291	Cysteine and glycine-rich protein 1	178	AKNFGPkGFGFGQ
stp_pc	Y	4	MPLYEGLGSGGEK	3	Q9NZ32	Actin-related protein 10	4	MPLyEGLGSG
stp_pc	K	4	INPKNYTDNELEK	1	P00367	Glutamate dehydrogenase 1, mitochondrial	191	GVKINPkNYTDNE
stp_pc	K	4	MALKQISSNK	3	P10768	S-formylglutathione hydrolase	4	MALkQISSNK
stp_pc	K	10	GPTEADELMKR	6	P11413	Glucose-6-phosphate 1-dehydrogenase	497	EADELMkRVGFQY
stp_pc	K	5	IIVEKPFGR	11	P11413	Glucose-6-phosphate 1-dehydrogenase	171	NRIIVEkPFGRDL
stp_pc	E	4	IIVEKPFGRDLQSSDR	2	P11413	Glucose-6-phosphate 1-dehydrogenase	170	WNRIIVeKPFGRD
stp_pc	K	7	FASFIDKVR	3	P02538	Keratin, type II cytoskeletal 6A	180	FASFIDkVRFLEQ
stp_pc	K	2	LKPLEVELR	1	P49755	Transmembrane emp24 domain-containing protein 10	145	AKVEKLkPLEVEL
stp_pc	K	10	AQTMSNSGIK	1	Q12904	Aminoacyl tRNA synthase complex-interacting multifunctional protein 1	312	MSNSGIk
stp_pc	K	9	MANNDAVLKR	2	Q12904	Aminoacyl tRNA synthase complex-interacting multifunctional protein 1	9	NNDAVLkRLEQKG
stp_pc	K	1	KIDFLTK	2	Q99471	Prefoldin subunit 5	106	KDFFKRkIDFLTK
stp_pc	N	3	KINPENSKLSDLDSETR	1	Q9Y266	Nuclear migration protein nudC	270	INTKKInPENSKL
stp_pc	K	14	ALYEQNQSDVNEAKSGGR	2	Q14691	DNA replication complex GINS protein PSF1	51	SDVNEAkSGGRSD
stp_pc	K	8	SDLIPTIKFR	4	Q14691	DNA replication complex GINS protein PSF1	63	DLIPTIkFRHCSL
stp_pc	K	10	NSPQEEVELKK	6	Q99933	BAG family molecular chaperone regulator 1	231	QEEVELkKLKHLE
stp_pc	K	10	MALSDADVQKQIK	1	P36543	V-type proton ATPase subunit E 1	10	SDADVQkQIKHMM
stp_pc	K	22	AVTELNEPLSNEDRNLLSVAYKNVVGAR	1	Q04917	14-3-3 protein eta	50	LLSVAYkNVVGAR
stp_pc	K	5	VFYLKMK	6	Q04917	14-3-3 protein eta	125	SKVFYLkMKGDYY
stp_pc	K	4	IMLKNVEDFTGPR	3	P61009	Signal peptidase complex subunit 3	49	VSRIMLkNVEDFT
stp_pc	K	1	KMGLTEDEDVR	1	Q8N3E9	1-phosphatidylinositol 4,5-bisphosphate phosphodiesterase delta-3	53	GLRALKkMGLTED
stp_pc	S	1	SVMEELKR	1	P61326	Protein mago nashi homolog	55	EAYVHKsVMEELK
stp_pc	Q	3	MPQYQTWEEFSR	12	P49458	Signal recognition particle 9 kDa protein	3	MPqYQTWEE
stp_pc	R	11	LIEVDDERKLR	1	P62753	40S ribosomal protein S6	25	DDERKLrTFYEKR
stp_pc	T	4	IAKTHEDIEAQIR	1	O75533	Splicing factor 3B subunit 1	7	MAKIAKtHEDIEA
stp_pc	K	3	MSKAHPPELK	2	P62308	Small nuclear ribonucleoprotein G	3	MSkAHPPEL
stp_pc	E	11	MAAAAELSLLEK	2	O43324	Eukaryotic translation elongation factor 1 epsilon-1	11	AELSLLeKSLGLS
stp_pc	K	12	MAAAAELSLLEKSLGLSK	1	O43324	Eukaryotic translation elongation factor 1 epsilon-1	12	ELSLLEkSLGLSK
stp_pc	Q	1	QANKEYLLGSTAEEK	3	O43324	Eukaryotic translation elongation factor 1 epsilon-1	54	AAHLVKqANKEYL
stp_pc	K	3	VSKPTDSKAER	1	Q6PI48	Aspartate--tRNA ligase, mitochondrial	635	YHIRVSkPTDSKA
stp_pc	D	9	MPGGLLLGDVAPNFEANTTVGR	1	P30041	Peroxiredoxin-6	9	GGLLLGdVAPNFE
stp_pc	K	10	AQAEVEGLGKGVAR	4	Q15149	Plectin	1175	EVEGLGkGVARLS
stp_pc	K	7	EGVMVAKK	1	Q15149	Plectin	28	EGVMVAkKDRRPR
stp_pc	K	1	KGLLSAEVAR	2	Q15149	Plectin	3849	IYQALKkGLLSAE
stp_pc	S	1	SSIAGLLLK	2	Q15149	Plectin	2833	HYLQGRsSIAGLL
stp_pc	N	2	KNGFVVLK	2	Q9GZV4	Eukaryotic translation initiation factor 5A-2	28	CSALRKnGFVVLK
stp_pc	S	7	IVEMSTSK	1	Q9GZV4	Eukaryotic translation initiation factor 5A-2	46	IVEMSTsKTGKHG
stp_pc	K	1	KGLDPYNVLAPK	7	P10606	Cytochrome c oxidase subunit 5B, mitochondrial	57	IMLAAKkGLDPYN
stp_pc	K	11	MNNSGADEIGKLFVGGLDWSTTQETLR	1	Q96EP5	DAZ-associated protein 1	11	GADEIGkLFVGGL
stp_pc	K	10	MSSTSPNLQKAIDLASK	2	O75351	Vacuolar protein sorting-associated protein 4B	10	TSPNLQkAIDLAS
stp_pc	K	6	FSAYIKNSRPEANEALER	4	Q9Y696	Chloride intracellular channel protein 4	130	KFSAYIkNSRPEA
stp_pc	K	1	KLNEILQAR	3	B5ME19	Eukaryotic translation initiation factor 3 subunit C-like protein	333	HAVVIKkLNEILQ
stp_pc	K	1	KIQEESLR	1	B5ME19	Eukaryotic translation initiation factor 3 subunit C-like protein	783	RTMLVRkIQEESL
stp_pc	S	8	MAETEALSK	3	Q9BUP3	Oxidoreductase HTATIP2	8	AETEALsKLREDF
stp_pc	K	4	MFAKATR	1	O60443	Gasdermin-E	4	MFAkATRNFL
stp_pc	S	1	SEYDRGVNTFSPEGR	1	P28066	Proteasome subunit alpha type-5	6	MFLTRsEYDRGV
stp_pc	K	1	KIQNDAGVR	1	Q96I24	Far upstream element-binding protein 3	278	NGEMIKkIQNDAG
stp_pc	K	15	MAELVQGQSAPVGMKAEGFVDALHR	1	Q96I24	Far upstream element-binding protein 3	15	SAPVGMkAEGFVD
stp_pc	S	14	ENDFDRLVLQYAPSA	1	O14579	Coatomer subunit epsilon	307	VLQYAPsA
stp_pc	K	1	KFGVVLDEIKPSSAPELQAVR	1	O14579	Coatomer subunit epsilon	65	AYLAQRkFGVVLD
stp_pc	S	1	SHPFIK	2	O14579	Coatomer subunit epsilon	283	LKDAHRsHPFIKE
stp_pc	K	6	MSDSEKLNLDSIIGR	1	P62136	Serine/threonine-protein phosphatase PP1-alpha catalytic subunit	6	MSDSEkLNLDSI
stp_pc	K	7	MAEVEQKK	1	P62841	40S ribosomal protein S15	7	MAEVEQkKKRTFR
stp_pc	K	7	MAGIAAKLAK	2	P17655	Calpain-2 catalytic subunit	7	MAGIAAkLAKDRE
stp_pc	K	2	LKEVEASKK	1	Q9UKS6	Protein kinase C and casein kinase substrate in neurons protein 3	148	PWLKRLkEVEASK
stp_pc	K	11	MSLSDWHLAVKLADQPLTPK	1	Q96S82	Ubiquitin-like protein 7	11	DWHLAVkLADQPL
stp_pc	K	1	KGSLESPATDVFGSTEEGEKR	1	O00232	26S proteasome non-ATPase regulatory subunit 12	330	YGMELRkGSLESP
stp_pc	K	14	DHTLEDEDVIQIVKK	1	Q9Y295	Developmentally-regulated GTP-binding protein 1	366	DVIQIVkK
stp_pc	K	6	ELITPKGGGGGGPGEGFDVAK	1	Q9Y295	Developmentally-regulated GTP-binding protein 1	46	RELITPkGGGGGG
stp_pc	S	1	SILAEYK	1	Q9Y295	Developmentally-regulated GTP-binding protein 1	207	DAETVKsILAEYK
stp_pc	K	4	AAGKLKAEGSEIR	6	P07237	Protein disulfide-isomerase	69	YAKAAGkLKAEGS
stp_pc	K	3	LAKVDATEESDLAQQYGVR	1	P07237	Protein disulfide-isomerase	81	SEIRLAkVDATEE
stp_pc	K	2	LKAEGSEIR	3	P07237	Protein disulfide-isomerase	71	KAAGKLkAEGSEI
stp_pc	K	7	TAAESFKGK	1	P07237	Protein disulfide-isomerase	283	TAAESFkGKILFI
stp_pc	K	10	MPLIGLGTWKSEPGQVK	11	P14550	Aldo-keto reductase family 1 member A1	23	IGLGTWkSEPGQV
stp_pc	S	2	MSTADALDDENTFK	4	P49959	Double-strand break repair protein MRE11	2	MsTADALD
stp_pc	K	8	SSGSGAGKGAVSAEQVIAGFNR	1	Q9UHV9	Prefoldin subunit 2	18	SGSGAGkGAVSAE
stp_pc	D	4	VMFDKITSR	3	P23921	Ribonucleoside-diphosphate reductase large subunit	16	QERVMFdKITSRI
stp_pc	S	11	KPSSATPVATSGK	1	Q8N1G1	RNA exonuclease 1 homolog	446	ATPVATsGKGRPD
stp_pc	K	18	LSPEPWTPETGLVTDAFKLK	1	O95573	Fatty acid CoA ligase Acsl3	699	LVTDAFkLKRKEL
stp_pc	T	5	MSSKTASTNNIAQAR	1	Q9UBI6	Guanine nucleotide-binding protein G(I)/G(S)/G(O) subunit gamma-12	5	MSSKtASTNNI
stp_pc	T	5	MKLNTQEIFDDWAR	1	Q14204	Cytoplasmic dynein 1 heavy chain 1	695	FRMKLNtQEIFDD
stp_pc	K	32	MSEPGGGGGEDGSAGLEVSAVQNVADVSVLQKHLR	1	Q14204	Cytoplasmic dynein 1 heavy chain 1	32	DVSVLQkHLRKLV
stp_pc	K	2	VKELEVR	1	O43674	NADH dehydrogenase [ubiquinone] 1 beta subcomplex subunit 5, mitochondrial	152	KAELRVkELEVRK
stp_pc	K	9	ANTFVAELKGLDPAR	1	P40926	Malate dehydrogenase, mitochondrial	185	TFVAELkGLDPAR
stp_pc	K	4	ASIKKGEDFVK	1	P40926	Malate dehydrogenase, mitochondrial	328	ELKASIkKGEDFV
stp_pc	K	1	KGEDFVK	3	P40926	Malate dehydrogenase, mitochondrial	329	LKASIKkGEDFVK
stp_pc	K	10	IQEAGTEVVKAK	4	P40926	Malate dehydrogenase, mitochondrial	239	AGTEVVkAKAGAG
stp_pc	K	6	NLGIGKVSSFEEK	2	P40926	Malate dehydrogenase, mitochondrial	307	KNLGIGkVSSFEE
stp_pc	K	10	ELNVSFINEKK	1	P49585	Choline-phosphate cytidylyltransferase A	238	VSFINEkKYHLQE
stp_pc	K	5	DEGGKAFFK	2	P05141	ADP/ATP translocase 2	268	ARDEGGkAFFKGA
stp_pc	K	7	LAADVGKAGAER	4	P05141	ADP/ATP translocase 2	147	LAADVGkAGAERE
stp_pc	K	10	MTDAAVSFAKDFLAGGVAAAISK	1	P05141	ADP/ATP translocase 2	10	AAVSFAkDFLAGG
stp_pc	K	23	MTDAAVSFAKDFLAGGVAAAISKTAVAPIER	1	P05141	ADP/ATP translocase 2	23	VAAAISkTAVAPI
stp_pc	K	2	VKLLLQVQHASK	3	P05141	ADP/ATP translocase 2	33	APIERVkLLLQVQ
stp_pc	K	1	KIAEGAQQGDPLSR	1	Q9UJ70	N-acetyl-D-glucosamine kinase	219	FAGFCRkIAEGAQ
stp_pc	K	12	ADLINNLGTIAKSGTK	9	P08238	Heat shock protein HSP 90-beta	107	NLGTIAkSGTKAF
stp_pc	K	12	ELISNASDALDKIR	1	P08238	Heat shock protein HSP 90-beta	53	ASDALDkIRYESL
stp_pc	H	2	KHLEINPDHPIVETLR	6	P08238	Heat shock protein HSP 90-beta	625	YMMAKKhLEINPD
stp_pc	K	3	IMKAQALR	2	P08238	Heat shock protein HSP 90-beta	607	NMERIMkAQALRD
stp_pc	S	1	SIYYITGESK	1	P08238	Heat shock protein HSP 90-beta	482	MKETQKsIYYITG
stp_pc	K	13	TLTLVDTGIGMTKADLINNLGTIAK	1	P08238	Heat shock protein HSP 90-beta	95	TGIGMTkADLINN
stp_pc	K	10	MADAAPQLGKR	1	Q96C86	m7GpppX diphosphatase	10	AAPQLGkRKRELD
stp_pc	K	11	MAAVAATAAAKGNGGGGGR	1	Q6Y1H2	Very-long-chain (3R)-3-hydroxyacyl-CoA dehydratase 2	11	AATAAAkGNGGGG
stp_pc	K	5	FGIEKEVR	1	O14964	Hepatocyte growth factor-regulated tyrosine kinase substrate	207	PKFGIEkEVRVCE
stp_pc	K	1	KILATPPQEDAPSVDIANIR	1	P29401	Transketolase	283	QIQSKKkILATPP
stp_pc	K	1	KLILDSAR	1	P29401	Transketolase	543	IKPLDRkLILDSA
stp_pc	K	12	MAAVQMDPELAKR	1	Q9Y312	Protein AAR2 homolog	12	MDPELAkRLFFEG
stp_pc	Q	2	LQDKATVLTTER	2	Q9UMS4	Pre-mRNA-processing factor 19	177	EIIQKLqDKATVL
stp_pc	S	9	VGAVAAATS	1	Q13310	Polyadenylate-binding protein 4	644	AVAAATs
stp_pc	K	4	AVTKYTSSK	1	P58876	Histone H2B type 1-D	121	GTKAVTkYTSSK
stp_pc	K	8	HAVSEGTKAVTK	1	P58876	Histone H2B type 1-D	117	AVSEGTkAVTKYT
stp_pc	E	2	KESYSVYVYK	2	P58876	Histone H2B type 1-D	36	RKRSRKeSYSVYV
stp_pc	K	9	LLLPGELAKHAVSEGTK	8	P58876	Histone H2B type 1-D	109	LPGELAkHAVSEG
stp_pc	E	3	MPEPTKSAPAPK	2	P58876	Histone H2B type 1-D	3	MPePTKSAP
stp_pc	K	3	VLKQVHPDTGISSK	2	P58876	Histone H2B type 1-D	47	YVYKVLkQVHPDT
stp_pc	K	6	LMDALKHASNMLGELR	2	Q96QK1	Vacuolar protein sorting-associated protein 35	44	KLMDALkHASNML
stp_pc	N	1	NFGTKISAR	2	Q01813	ATP-dependent 6-phosphofructokinase, platelet type	684	PSPFDRnFGTKIS
stp_pc	S	1	SNPTFYLQK	1	Q709F0	Acyl-CoA dehydrogenase family member 11	54	QYRAGKsNPTFYL
stp_pc	S	20	EVDPLVYNMSHEDPGNVSYSEIGGLSEQIR	1	P62333	26S proteasome regulatory subunit 10B	133	PGNVSYsEIGGLS
stp_pc	K	8	GAYGVVEKVR	2	P46734	Dual specificity mitogen-activated protein kinase kinase 3	80	AYGVVEkVRHAQS
stp_pc	K	11	ATEPVIAFYEKR	1	P00568	Adenylate kinase isoenzyme 1	166	VIAFYEkRGIVRK
stp_pc	K	5	VNTSKGFLIDGYPR	1	P00568	Adenylate kinase isoenzyme 1	88	AKVNTSkGFLIDG
stp_pc	K	3	ALKMIVDPVEPHGEMK	12	Q13263	Transcription intermediary factor 1-beta	377	QLHRALkMIVDPV
stp_pc	K	31	MAASAAAASAAAASAASGSPGPGEGSAGGEKR	1	Q13263	Transcription intermediary factor 1-beta	31	GSAGGEkRSTAPS
stp_pc	K	7	QVSDVQKR	1	Q13263	Transcription intermediary factor 1-beta	289	QVSDVQkRVQVDV
stp_pc	K	1	KFPAVETR	1	Q9Y2A7	Nck-associated protein 1	63	VKFIVRkFPAVET
stp_pc	K	9	MAAAEEEPKPK	1	P55263	Adenosine kinase	9	AAEEEPkPKKLKV
stp_pc	Y	4	VMPYVDILFGNETEAATFAR	2	P55263	Adenosine kinase	233	LMKVMPyVDILFG
stp_pc	K	1	KLLADQAEAR	1	P84098	60S ribosomal protein L19	153	ADKARKkLLADQA
stp_pc	K	4	EAVKHIGYDDSSKGFDYK	1	P31153	S-adenosylmethionine synthase isoform type-2	88	VVREAVkHIGYDD
stp_pc	Y	4	MAEYDLTTR	1	P60228	Eukaryotic translation initiation factor 3 subunit E	4	MAEyDLTTRI
stp_pc	Y	14	SEAPNWATQDSGFY	1	P60228	Eukaryotic translation initiation factor 3 subunit E	445	TQDSGFy
stp_pc	K	8	TTVVAQLKQLQAETEPIVK	1	P60228	Eukaryotic translation initiation factor 3 subunit E	82	TVVAQLkQLQAET
stp_pc	S	1	SLLLTVSQYK	1	Q8TCG1	Protein CIP2A	9	STACLKsLLLTVS
stp_pc	K	17	MTDQAFVTLTTNDAYAKGALVLGSSLK	1	P46976	Glycogenin-1	17	TNDAYAkGALVLG
stp_pc	K	8	MASEDIAKLAETLAK	1	P46060	Ran GTPase-activating protein 1	8	ASEDIAkLAETLA
stp_pc	K	6	VSSVFKDEATVR	1	P46060	Ran GTPase-activating protein 1	481	KVSSVFkDEATVR
stp_pc	K	1	KVIDDTNITR	11	P05783	Keratin, type I cytoskeletal 18	187	DIHGLRkVIDDTN
stp_pc	K	25	LLEDGEDFNLGDALDSSNSMQTIQKTTTR	2	P05783	Keratin, type I cytoskeletal 18	407	SMQTIQkTTTRRI
stp_pc	K	3	NLKASLENSLR	3	P05783	Keratin, type I cytoskeletal 18	317	DSMRNLkASLENS
stp_pc	Q	1	QAQEYEALLNIK	3	P05783	Keratin, type I cytoskeletal 18	359	RAEGQRqAQEYEA
stp_pc	K	9	VVSETNDTKVLRH	2	P05783	Keratin, type I cytoskeletal 18	426	SETNDTkVLRH
stp_pc	K	3	LPKEVQLE	1	Q9BS40	Latexin	217	HNSRLPkEVQLE
stp_pc	K	6	VFEVQKVK	4	Q9BS40	Latexin	36	RVFEVQkVKQASM
stp_pc	K	2	VKQASMEDIPGR	3	Q9BS40	Latexin	38	FEVQKVkQASMED
stp_pc	K	4	LSAKFGGQA	1	P50502	Hsc70-interacting protein	364	ISKLSAkFGGQA
stp_pc	K	15	MSELDQLRQEAEQLKNQIR	1	P62873	Guanine nucleotide-binding protein G(I)/G(S)/G(T) subunit beta-1	15	QEAEQLkNQIRDA
stp_pc	K	10	EAIEGTYIDKK	6	P62280	40S ribosomal protein S11	58	EGTYIDkKCPFTG
stp_pc	K	5	FNVLKVTK	3	P62280	40S ribosomal protein S11	144	VRFNVLkVTKAAG
stp_pc	K	9	GIYAYGFEKPSAIQQR	2	P60842	Eukaryotic initiation factor 4A-I	54	YAYGFEkPSAIQQ
stp_pc	S	10	GYDVIAQAQSGTGK	2	P60842	Eukaryotic initiation factor 4A-I	78	VIAQAQsGTGKTA
stp_pc	E	2	KEELTLEGIR	3	P60842	Eukaryotic initiation factor 4A-I	239	RILVKKeELTLEG
stp_pc	K	1	KGVAINMVTEEDKR	3	P60842	Eukaryotic initiation factor 4A-I	369	GGRFGRkGVAINM
stp_pc	K	1	KVDWLTEK	2	P60842	Eukaryotic initiation factor 4A-I	284	FINTRRkVDWLTE
stp_pc	K	1	KGINTLVTYDMVPEPK	3	P20674	Cytochrome c oxidase subunit 5A, mitochondrial	72	DAWELRkGINTLV
stp_pc	N	4	KGINTLVTYDMVPEPK	1	P20674	Cytochrome c oxidase subunit 5A, mitochondrial	75	ELRKGInTLVTYD
stp_pc	S	3	MASGVAVSDGVIK	2	P23528	Cofilin-1	3	MAsGVAVSD
stp_pc	K	19	MASGVAVSDGVIKVFNDMKVR	1	P23528	Cofilin-1	19	KVFNDMkVRKSST
stp_pc	S	14	AFLDALQNQAEASSK	3	Q12931	Heat shock protein 75 kDa, mitochondrial	195	NQAEASsKIIGQF
stp_pc	K	12	EGIVTATEQEVKEDIAK	2	Q12931	Heat shock protein 75 kDa, mitochondrial	461	ATEQEVkEDIAKL
stp_pc	K	1	KLLDIVAR	3	Q12931	Heat shock protein 75 kDa, mitochondrial	96	FQAETKkLLDIVA
stp_pc	K	7	LNELLVKALER	4	Q12931	Heat shock protein 75 kDa, mitochondrial	699	LNELLVkALERH
stp_pc	K	6	MQQLAKTQEER	1	Q12931	Heat shock protein 75 kDa, mitochondrial	629	RMQQLAkTQEERA
stp_pc	Y	1	YEVTSGGGGTSR	1	P15924	Desmoplakin	28	SGPDLRyEVTSGG
stp_pc	S	7	VEEIAASK	2	Q02543	60S ribosomal protein L18a	135	VEEIAAsKCRRPA
stp_pc	T	1	TSTGAPAAIK	4	P40121	Macrophage-capping protein	128	ESAFHKtSTGAPA
stp_pc	K	12	VSGAQEMVSSAKDTVATQLSEAVDATR	1	O60664	Perilipin-3	140	EMVSSAkDTVATQ
stp_pc	K	1	KLAVNMVPFPR	12	Q9BUF5	Tubulin beta-6 chain	252	LNADLRkLAVNMV
stp_pc	Q	2	AQKGELLER	1	O43264	Centromere/kinetochore protein zw10 homolog	596	LAQMRAqKGELLE
stp_pc	K	5	ANVAKAGLVDDFEK	2	O75947	ATP synthase subunit d, mitochondrial	63	YKANVAkAGLVDD
stp_pc	K	10	EFLQINSLGKLPTLK	3	P0CG30	Glutathione S-transferase theta-2B	53	QINSLGkLPTLKD
stp_pc	E	4	MGLELFLDLVSQPSR	1	P0CG30	Glutathione S-transferase theta-2B	4	MGLeLFLDLV
stp_pc	K	8	VAELLLAKAAGPELR	5	Q5T6V5	Q-nucleotide N-glycosylase 1	38	AELLLAkAAGPEL
stp_pc	K	10	MAAPVDLELKK	1	O60925	Prefoldin subunit 1	10	PVDLELkKAFTEL
stp_pc	K	11	MATAEVLNIGKK	3	P22234	Bifunctional phosphoribosylaminoimidazole carboxylase/phosphoribosylaminoimidazole succinocarboxamide synthetase	11	EVLNIGkKLYEGK
stp_pc	H	5	VTSAHKGPDETLR	1	P22234	Bifunctional phosphoribosylaminoimidazole carboxylase/phosphoribosylaminoimidazole succinocarboxamide synthetase	303	LRVTSAhKGPDET
stp_pc	K	6	DYQDNKADVILK	1	P47813	Eukaryotic translation initiation factor 1A, X-chromosomal	88	RDYQDNkADVILK
stp_pc	T	5	KLVNTINPGAR	1	Q92900	Regulator of nonsense transcripts 1	933	PRKLVNtINPGAR
stp_pc	K	3	LLKAGAKPDQIGIITPYEGQR	1	Q92900	Regulator of nonsense transcripts 1	793	ITTKLLkAGAKPD
stp_pc	K	5	FLQEKGPSVDWGK	2	Q16851	UTP--glucose-1-phosphate uridylyltransferase	69	HRFLQEkGPSVDW
stp_pc	K	7	LAAIVAKQVLLGR	1	P40429	60S ribosomal protein L13a	25	LAAIVAkQVLLGR
stp_pc	K	8	MVVPAALKVVR	2	P40429	60S ribosomal protein L13a	125	VVPAALkVVRLKP
stp_pc	Y	1	YQAVTATLEEK	2	P40429	60S ribosomal protein L13a	149	HEVGWKyQAVTAT
stp_pc	K	5	AEPAKIEAFR	7	P00558	Phosphoglycerate kinase 1	146	VKAEPAkIEAFRA
stp_pc	K	8	DASGNKVKAEPAK	1	P00558	Phosphoglycerate kinase 1	141	ASGNKVkAEPAKI
stp_pc	K	12	ITLPVDFVTADKFDENAK	1	P00558	Phosphoglycerate kinase 1	291	DFVTADkFDENAK
stp_pc	K	8	VDFNVPMKNNQITNNQR	3	P00558	Phosphoglycerate kinase 1	30	DFNVPMkNNQITN
stp_pc	K	1	KLNVSSDTVQHGVEGLTYLLTESSK	1	Q86X83	COMM domain-containing protein 2	50	YEGAARkLNVSSD
stp_pc	T	9	VSFTGSVPTGMKIMEMSAK	1	P49189	4-trimethylaminobutyraldehyde dehydrogenase	236	FTGSVPtGMKIME
stp_pc	K	12	VSFTGSVPTGMKIMEMSAK	3	P49189	4-trimethylaminobutyraldehyde dehydrogenase	239	SVPTGMkIMEMSA
stp_pc	K	1	KLEVEANNAFDQYR	1	P47756	F-actin-capping protein subunit beta	95	PSARLRkLEVEAN
stp_pc	K	14	MMLGTEGGEGFVVKVR	1	P31943	Heterogeneous nuclear ribonucleoprotein H	14	GEGFVVkVRGLPW
stp_pc	K	9	ALAENSGVKANEVISK	2	P50990	T-complex protein 1 subunit theta	459	AENSGVkANEVIS
stp_pc	K	9	APGFAQMLKEGAK	4	P50990	T-complex protein 1 subunit theta	16	GFAQMLkEGAKHF
stp_pc	K	10	AVDDGVNTFKVLTR	3	P50990	T-complex protein 1 subunit theta	400	DGVNTFkVLTRDK
stp_pc	S	3	HFSGLEEAVYR	2	P50990	T-complex protein 1 subunit theta	23	EGAKHFsGLEEAV
stp_pc	K	7	MALHVPKAPGFAQMLK	3	P50990	T-complex protein 1 subunit theta	7	MALHVPkAPGFAQ
stp_pc	K	3	ALKVLDNYLTSPLPEEVDETSAEDEGVSQR	4	O00299	Chloride intracellular channel protein 1	138	GLLKALkVLDNYL
stp_pc	K	6	FSAYIKNSNPALNDNLEK	3	O00299	Chloride intracellular channel protein 1	119	KFSAYIkNSNPAL
stp_pc	K	13	MAEEQPQVELFVKAGSDGAK	9	O00299	Chloride intracellular channel protein 1	13	QVELFVkAGSDGA
stp_pc	K	16	NSNPALNDNLEKGLLKALK	1	O00299	Chloride intracellular channel protein 1	135	LEKGLLkALKVLD
stp_pc	T	6	MPAIMTMLADHAAR	3	O14980	Exportin-1	6	MPAIMtMLADHA
stp_pc	K	6	NVDILKDPETVK	3	O14980	Exportin-1	680	KNVDILkDPETVK
stp_pc	K	8	ELPSFLGKR	5	P26447	Protein S100-A4	48	LPSFLGkRTDEAA
stp_pc	K	4	SELKELLTR	6	P26447	Protein S100-A4	35	LNKSELkELLTRE
stp_pc	K	4	YSGKEGDKFK	1	P26447	Protein S100-A4	22	FHKYSGkEGDKFK
stp_pc	K	6	MAAGFKTVEPLEYYRR	2	Q96B26	Exosome complex component RRP43	6	MAAGFkTVEPLE
stp_pc	K	19	MAALDSLSLFTSLGLSEQKAR	1	P47897	Glutamine--tRNA ligase	19	LGLSEQkARETLK
stp_pc	Q	1	QGAKINEIR	2	Q15366	Poly(rC)-binding protein 2	306	GCIIGRqGAKINE
stp_pc	K	8	QMSGAQIKIANPVEGSTDR	1	Q15366	Poly(rC)-binding protein 2	322	MSGAQIkIANPVE
stp_pc	K	2	EKHALLEGR	1	P30533	Alpha-2-macroglobulin receptor-associated protein	323	VSRSREkHALLEG
stp_pc	S	1	SFVPNMIGGASQADLAVLVISAR	1	P15170	Eukaryotic peptide chain release factor GTP-binding subunit ERF3A	164	DAPGHKsFVPNMI
stp_pc	K	2	AKEAQDDLVK	3	P15311	Ezrin	450	EWQHRAkEAQDDL
stp_pc	K	7	NISFNDKK	1	P15311	Ezrin	253	NISFNDkKFVIKP
stp_pc	K	16	IINEPTAAAIAYGLDKK	2	P11142	Heat shock cognate 71 kDa protein	187	IAYGLDkKVGAER
stp_pc	K	15	NQVAMNPTNTVFDAKR	5	P11142	Heat shock cognate 71 kDa protein	71	NTVFDAkRLIGRR
stp_pc	Q	1	QATKDAGTIAGLNVLR	4	P11142	Heat shock cognate 71 kDa protein	156	FNDSQRqATKDAG
stp_pc	K	6	VQVEYKGETK	1	P11142	Heat shock cognate 71 kDa protein	108	KVQVEYkGETKSF
stp_pc	K	12	EASIDILHSIVKR	3	O00231	26S proteasome non-ATPase regulatory subunit 11	32	ILHSIVkRDIQEN
stp_pc	K	10	DLQQYQSQAKQLFR	4	O75396	Vesicle-trafficking protein SEC22b	38	QYQSQAkQLFRKL
stp_pc	K	1	KLNEQSPTR	1	O75396	Vesicle-trafficking protein SEC22b	43	AKQLFRkLNEQSP
stp_pc	K	1	KLYIDSR	3	O75396	Vesicle-trafficking protein SEC22b	124	FIQKTKkLYIDSR
stp_pc	K	1	KFLDGIYVSEK	4	P32969	60S ribosomal protein L9	174	KNKDIRkFLDGIY
stp_pc	T	1	TILSNQTVDIPENVDITLK	1	P32969	60S ribosomal protein L9	3	MKtILSNQT
stp_pc	K	19	TILSNQTVDIPENVDITLKGR	3	P32969	60S ribosomal protein L9	21	NVDITLkGRTVIV
stp_pc	S	3	MASALEQFVNSVR	2	Q9UNS2	COP9 signalosome complex subunit 3	3	MAsALEQFV
stp_pc	K	7	SIGAAAKSQVISNAK	1	P34932	Heat shock 70 kDa protein 4	53	SIGAAAkSQVISN
stp_pc	T	2	KTVGVEPAADGKGVVVVIK	1	P46779	60S ribosomal protein L28	48	GLIHRKtVGVEPA
stp_pc	K	13	GSVLEPEGTVEIKFR	2	Q13085	Acetyl-CoA carboxylase 1	2127	EGTVEIkFRRKDL
stp_pc	K	1	KVNNADDFPNLFR	4	Q13085	Acetyl-CoA carboxylase 1	323	GGKGIRkVNNADD
stp_pc	K	4	AGGKILTFDQLALDSPK	5	Q07020	60S ribosomal protein L18	119	ILRAGGkILTFDQ
stp_pc	S	11	ILTFDQLALDSPK	1	Q07020	60S ribosomal protein L18	130	DQLALDsPKGCGT
stp_pc	Y	7	VSGVDGYETEGIR	2	Q14566	DNA replication licensing factor MCM6	276	VSGVDGyETEGIR
stp_pc	E	9	MLGSGFKAER	1	P53990	IST1 homolog	9	GSGFKAeRLRVNL
stp_pc	K	7	LATLNEKLTALER	2	Q8WUW1	Protein BRICK1	53	LATLNEkLTALER
stp_pc	K	1	KGIGPVYSSK	2	P30520	Adenylosuccinate synthetase isozyme 2	164	NLGTTKkGIGPVY
stp_pc	K	8	LYEQLSGK	1	P30086	Phosphatidylethanolamine-binding protein 1	187	YEQLSGk
stp_pc	K	1	KLVDYDSAR	2	P49418	Amphiphysin	141	IAKRSRkLVDYDS
stp_pc	N	3	GANEATKTLNR	1	P55769	NHP2-like protein 1	40	QLRKGAnEATKTL
stp_pc	K	7	EVSTYIKK	6	P68104	Elongation factor 1-alpha 1	179	EVSTYIkKIGYNP
stp_pc	K	1	KLEDGPK	5	P68104	Elongation factor 1-alpha 1	386	DRRSGKkLEDGPK
stp_pc	K	6	LEDGPKFLK	3	P68104	Elongation factor 1-alpha 1	392	KLEDGPkFLKSGD
stp_pc	K	18	IGGIGTVPVGRVETGVLKPGMVVTFAPVNVTTEVK	1	P68104	Elongation factor 1-alpha 1	273	VETGVLkPGMVVT
stp_pc	K	9	QTVAVGVIKAVDK	8	P68104	Elongation factor 1-alpha 1	439	VAVGVIkAVDKKA
stp_pc	K	4	TIEKFEKEAAEMGK	1	P68104	Elongation factor 1-alpha 1	41	DKRTIEkFEKEAA
stp_pc	S	2	MSSFSESALEK	7	Q9NQG5	Regulation of nuclear pre-mRNA domain-containing protein 1B	2	MsSFSESA
stp_pc	K	8	EEVGQYLKK	1	Q6GMV3	Putative peptidyl-tRNA hydrolase PTRHD1	134	EVGQYLkKFRLFK
stp_pc	K	14	AEQEEEFISNTLFKK	2	Q16204	Coiled-coil domain-containing protein 6	118	ISNTLFkKIQALQ
stp_pc	K	3	FLKNEVER	1	Q16204	Coiled-coil domain-containing protein 6	266	RHIRFLkNEVERL
stp_pc	S	1	SITVLVEGENTR	1	P33993	DNA replication licensing factor MCM7	252	VGNIPRsITVLVE
stp_pc	Y	8	MSSIGTGYDLSASTFSPDGR	2	P25788	Proteasome subunit alpha type-3	8	SSIGTGyDLSAST
stp_pc	Y	11	LTVEDPVTVEYITR	5	Q8TAA3	Proteasome subunit alpha-type 8	114	DPVTVEyITRFIA
stp_pc	Y	15	DLYANTVLSGGTTMYPGIADR	2	P60709	Actin, cytoplasmic 1	306	SGGTTMyPGIADR
stp_pc	Y	3	DSYVGDEAQSK	8	P60709	Actin, cytoplasmic 1	53	MGQKDSyVGDEAQ
stp_pc	K	11	DSYVGDEAQSKR	2	P60709	Actin, cytoplasmic 1	61	GDEAQSkRGILTL
stp_pc	K	11	EITALAPSTMKIK	10	P60709	Actin, cytoplasmic 1	326	LAPSTMkIKIIAP
stp_pc	Y	2	GYSFTTTAER	2	P60709	Actin, cytoplasmic 1	198	ILTERGySFTTTA
stp_pc	K	11	HQGVMVGMGQKDSYVGDEAQSK	5	P60709	Actin, cytoplasmic 1	50	MVGMGQkDSYVGD
stp_pc	D	2	KDLYANTVLSGGTTMYPGIADR	7	P60709	Actin, cytoplasmic 1	292	DVDIRKdLYANTV
stp_pc	K	2	IKIIAPPER	8	P60709	Actin, cytoplasmic 1	328	PSTMKIkIIAPPE
stp_pc	K	3	MQKEITALAPSTMK	3	P60709	Actin, cytoplasmic 1	315	IADRMQkEITALA
stp_pc	K	18	VAPEEHPVLLTEAPLNPKANR	21	P60709	Actin, cytoplasmic 1	113	EAPLNPkANREKM
stp_pc	K	9	DLPEHAVLKMK	3	Q00839	Heterogeneous nuclear ribonucleoprotein U	635	PEHAVLkMKGNFT
stp_pc	T	10	EAAGKSSGPTSLFAVTVAPPGAR	1	Q00839	Heterogeneous nuclear ribonucleoprotein U	191	GKSSGPtSLFAVT
stp_pc	K	10	NGQDLGVAFKISK	1	Q00839	Heterogeneous nuclear ribonucleoprotein U	433	DLGVAFkISKEVL
stp_pc	Q	1	QMADTGKLNTLLQR	5	Q00839	Heterogeneous nuclear ribonucleoprotein U	545	VAGFKKqMADTGK
stp_pc	D	4	QMADTGKLNTLLQR	1	Q00839	Heterogeneous nuclear ribonucleoprotein U	548	FKKQMAdTGKLNT
stp_pc	T	2	VTEKIPVR	3	Q00839	Heterogeneous nuclear ribonucleoprotein U	341	CFEMKVtEKIPVR
stp_pc	K	7	MATLKEKLIAPVAEEEATVPNNK	3	P07195	L-lactate dehydrogenase B chain	7	MATLKEkLIAPVA
stp_pc	Y	7	MVVESAYEVIK	1	P07195	L-lactate dehydrogenase B chain	240	MVVESAyEVIKLK
stp_pc	K	11	MVVESAYEVIKLK	1	P07195	L-lactate dehydrogenase B chain	244	SAYEVIkLKGYTN
stp_pc	T	5	MPGPTPSGTNVGSSGR	1	P60468	Protein transport protein Sec61 subunit beta	5	MPGPtPSGTNV
stp_pc	T	7	LGAYYVTGKGGLTQDLK	1	Q96BR5	Cytochrome c oxidase assembly factor 7	80	LGAYYVtGKGGLT
stp_pc	K	1	KAYIEINR	2	Q14966	Zinc finger protein 638	943	ILSSHKkAYIEIN
stp_pc	E	5	AQMIEKR	1	Q13813	Spectrin alpha chain, non-erythrocytic 1	1542	LKAQMIeKRSKLG
stp_pc	K	12	MSASAVYVLDLKGK	2	Q9BXS5	AP-1 complex subunit mu-1	12	VYVLDLkGKVLIC
stp_pc	K	8	ELNITAAKEIEVGGGRK	6	P62081	40S ribosomal protein S7	49	LNITAAkEIEVGG
stp_pc	K	11	MAGLNSLEAVKR	5	P67936	Tropomyosin alpha-4 chain	11	NSLEAVkRKIQAL
stp_pc	K	4	MAAKVFESIGK	2	P35232	Prohibitin 1	4	MAAkVFESIG
stp_pc	K	9	DQLSAVASK	2	Q9P000	COMM domain-containing protein 9	198	LSAVASk
stp_pc	K	8	ELTAVVQKR	3	P23396	40S ribosomal protein S3	75	LTAVVQkRFGFPE
stp_pc	K	14	FGFPEGSVELYAEKVATR	1	P23396	40S ribosomal protein S3	90	VELYAEkVATRGL
stp_pc	S	1	SLDTHVTK	1	Q14166	Tubulin--tyrosine ligase-like protein 12	426	PWNLARsLDTHVT
stp_pc	S	1	SSPGQTPEEGAQALAEFAALHGPALR	1	Q14166	Tubulin--tyrosine ligase-like protein 12	15	RRPAERsSPGQTP
stp_pc	K	5	LLVGKSASVDAEK	1	Q13620	Cullin-4B	619	KRLLVGkSASVDA
stp_pc	K	7	LEEVTGKLQVAR	2	O94906	Pre-mRNA-processing factor 6	324	LEEVTGkLQVARN
stp_pc	S	1	SALLALGLK	1	Q12874	Splicing factor 3A subunit 3	265	GLDRLKsALLALG
stp_pc	K	4	TILKDATLTALDR	4	P40939	Trifunctional enzyme subunit alpha, mitochondrial	390	GLKTILkDATLTA
stp_pc	K	5	STALKILAGK	1	P61221	ATP-binding cassette sub-family E member 1	121	GKSTALkILAGKQ
stp_pc	K	1	KLESTESR	1	P02545	Prelamin-A/C	420	SVTKKRkLESTES
stp_pc	K	1	KLLEGEEER	11	P02545	Prelamin-A/C	378	EIHAYRkLLEGEE
stp_pc	K	13	IDSLSAQLSQLQKQLAAK	1	P02545	Prelamin-A/C	311	QLSQLQkQLAAKE
stp_pc	K	9	LEAALGEAKK	1	P02545	Prelamin-A/C	180	AALGEAkKQLQDE
stp_pc	E	2	LEKAIAFADR	1	O43716	Glutamyl-tRNA(Gln) amidotransferase subunit C, mitochondrial	58	EAVARLeKAIAFA
stp_pc	Y	2	KYADLLEESR	1	Q9NUQ3	Gamma-taxilin	163	AALCKKyADLLEE
stp_pc	K	10	QTESTSFLEKK	1	P60900	Proteasome subunit alpha type-6	181	STSFLEkKVKKKF
stp_pc	K	7	MNINDLKLTLSK	1	Q16222	UDP-N-acetylhexosamine pyrophosphorylase	7	MNINDLkLTLSKA
stp_pc	K	1	KIQNDAGVR	1	Q92945	Far upstream element-binding protein 2	347	SGEMIKkIQNDAG
stp_pc	K	4	IQFKQDDGTGPEK	1	Q92945	Far upstream element-binding protein 2	359	GVRIQFkQDDGTG
stp_pc	K	4	AVGKVIPELNGK	16	P04406	Glyceraldehyde-3-phosphate dehydrogenase	219	AAKAVGkVIPELN
stp_pc	K	15	GALQNIIPASTGAAKAVGK	2	P04406	Glyceraldehyde-3-phosphate dehydrogenase	215	ASTGAAkAVGKVI
stp_pc	Q	3	QHQQQKALQSGPPQSR	1	O00425	Insulin-like growth factor 2 mRNA-binding protein 3	564	TQVKQHqQQKALQ
stp_pc	S	1	SGLGSGPK	1	O14880	Microsomal glutathione S-transferase 3	142	HLGWVKsGLGSGP
stp_pc	E	4	MFEEKASSPSGK	1	P26639	Threonine--tRNA ligase 1, cytoplasmic	4	MFEeKASSPS
stp_pc	K	10	MVDREQLVQKAR	10	P61981	14-3-3 protein gamma	10	REQLVQkARLAEQ
stp_pc	K	8	NLLSVAYKNVVGAR	5	P61981	14-3-3 protein gamma	50	LLSVAYkNVVGAR
stp_pc	K	9	TSADGNEKKIEMVR	3	P61981	14-3-3 protein gamma	78	ADGNEKkIEMVRA
stp_pc	K	5	VFYLKMK	6	P61981	14-3-3 protein gamma	125	SKVFYLkMKGDYY
stp_pc	K	8	VISSIEQKTSADGNEKK	1	P61981	14-3-3 protein gamma	69	ISSIEQkTSADGN
stp_pc	K	7	MASLLAKDAYLQSLAK	1	O75683	Surfeit locus protein 6	7	MASLLAkDAYLQS
stp_pc	K	2	VKPAPDETSFSEALLKR	5	Q12905	Interleukin enhancer-binding factor 2	45	MAFPRVkPAPDET
stp_pc	D	8	MADHSFSDGVPSDSVEAAK	1	Q99733	Nucleosome assembly protein 1-like 4	8	ADHSFSdGVPSDS
stp_pc	K	2	AKFEELNMDLFR	4	P11021	Endoplasmic reticulum chaperone BiP	326	ETLTRAkFEELNM
stp_pc	K	12	MATETVELHKLK	1	P82979	SAP domain-containing ribonucleoprotein	12	VELHKLkLAELKQ
stp_pc	K	2	LKEQGQAPITPQQGQALAK	1	P84095	Rho-related GTP-binding protein RhoG	130	DTLRRLkEQGQAP
stp_pc	S	2	MSASVVSVISR	3	P61803	Dolichyl-diphosphooligosaccharide--protein glycosyltransferase subunit DAD1	2	MsASVVSV
stp_pc	K	1	KSDVEAIFSK	1	P07910	Heterogeneous nuclear ribonucleoproteins C1/C2	30	NTLVVKkSDVEAI
stp_pc	K	10	KSDVEAIFSKYGK	1	P07910	Heterogeneous nuclear ribonucleoproteins C1/C2	39	VEAIFSkYGKIVG
stp_pc	K	8	MASNVTNKTDPR	3	P07910	Heterogeneous nuclear ribonucleoproteins C1/C2	8	ASNVTNkTDPRSM
stp_pc	S	1	SDVEAIFSK	2	P07910	Heterogeneous nuclear ribonucleoproteins C1/C2	31	TLVVKKsDVEAIF
stp_pc	K	12	VFIGNLNTLVVKK	1	P07910	Heterogeneous nuclear ribonucleoproteins C1/C2	29	LNTLVVkKSDVEA
stp_pc	K	12	SFPVNSDVGVLKWR	2	P48444	Coatomer subunit delta	363	SDVGVLkWRLQTT
stp_pc	Y	1	YVGKEPSGLR	1	O94925	Glutaminase kidney isoform, mitochondrial	308	TEYVHRyVGKEPS
stp_pc	K	3	AAKVLEQLTGQTPVFSK	5	P62913	60S ribosomal protein L11	38	RLTRAAkVLEQLT
stp_pc	K	7	AEEILEKGLK	1	P62913	60S ribosomal protein L11	85	AEEILEkGLKVRE
stp_pc	K	3	GAKAEEILEK	2	P62913	60S ribosomal protein L11	78	CTVRGAkAEEILE
stp_pc	K	14	VLEQLTGQTPVFSKAR	1	P62913	60S ribosomal protein L11	52	QTPVFSkARYTVR
stp_pc	K	11	ANPFGGASHAKGIVLEK	4	P62266	40S ribosomal protein S23	48	GGASHAkGIVLEK
stp_pc	S	20	DSFDDRGPSLNPVLDYDHGSR	1	P43243	Matrin-3	206	LDYDHGsRSQESG
stp_pc	S	2	MSKSFQQSSLSR	2	P43243	Matrin-3	2	MsKSFQQS
stp_pc	S	1	SFQQSSLSR	1	P43243	Matrin-3	4	MSKsFQQSSL
stp_pc	K	6	VFDVTKGR	1	O00264	Membrane-associated progesterone receptor component 1	102	KVFDVTkGRKFYG
stp_pc	E	5	MAGGEAGVTLGQPHLSR	4	P41091	Eukaryotic translation initiation factor 2 subunit 3	5	MAGGeAGVTLG
stp_pc	K	1	KIEEIKDFLLTAR	1	P63173	60S ribosomal protein L38	4	MPRkIEEIKD
stp_pc	T	11	EESGKPGAHVTVK	1	P22626	Heterogeneous nuclear ribonucleoproteins A2/B1	110	KPGAHVtVKKLFV
stp_pc	E	1	EKEQFRK	1	P22626	Heterogeneous nuclear ribonucleoproteins A2/B1	16	LERKKReKEQFRK
stp_pc	K	1	KALSRQEMQEVQSSR	1	P22626	Heterogeneous nuclear ribonucleoproteins A2/B1	186	HNAEVRkALSRQE
stp_pc	K	1	KLFIGGLSFETTEESLR	1	P22626	Heterogeneous nuclear ribonucleoproteins A2/B1	22	EKEQFRkLFIGGL
stp_pc	S	9	QEMQEVQSSR	1	P22626	Heterogeneous nuclear ribonucleoproteins A2/B1	199	MQEVQSsRSGRGG
stp_pc	H	3	MVHQVLYR	4	Q16762	Thiosulfate sulfurtransferase	3	MVhQVLYRA
stp_pc	K	1	KGESGQSWPR	1	Q15185	Prostaglandin E synthase 3	79	ILCCLRkGESGQS
stp_pc	K	10	MAATTGSGVKVPR	2	Q13404	Ubiquitin-conjugating enzyme E2 variant 1	10	TTGSGVkVPRNFR
stp_pc	S	16	MAVNVYSTSVTSDNLSR	2	Q15691	Microtubule-associated protein RP/EB family member 1	16	VTSDNLsRHDMLA
stp_pc	S	1	SLTPLDAR	5	Q9H5Q4	Dimethyladenosine transferase 2, mitochondrial	341	VIDHLRsLTPLDA
stp_pc	R	3	MGREFGNLTR	5	O14949	Cytochrome b-c1 complex subunit 8	3	MGrEFGNLT
stp_pc	K	7	SLVLDLKQPR	1	Q9UHK6	Alpha-methylacyl-CoA racemase	58	SLVLDLkQPRGAA
stp_pc	K	7	MADEIAKAQVARPGGDTIFGK	4	P49773	Adenosine 5'-monophosphoramidase HINT1	7	MADEIAkAQVARP
stp_pc	K	6	MEALGKLK	2	Q9Y282	Endoplasmic reticulum-Golgi intermediate compartment protein 3	6	MEALGkLKQFDA
stp_pc	K	12	ALEQFATVVEAKLIK	1	P49748	Very long-chain specific acyl-CoA dehydrogenase, mitochondrial	550	ATVVEAkLIKHKK
stp_pc	K	1	KGIVNEQFLLQR	11	P49748	Very long-chain specific acyl-CoA dehydrogenase, mitochondrial	556	KLIKHKkGIVNEQ
stp_pc	K	12	TPVTDPATGAVKEK	1	P49748	Very long-chain specific acyl-CoA dehydrogenase, mitochondrial	276	PATGAVkEKITAF
stp_pc	K	9	FILPVNEGKK	1	Q9Y3A5	Ribosome maturation protein SBDS	184	LPVNEGkKLKEKL
stp_pc	D	7	GEVQVSDKER	2	Q9Y3A5	Ribosome maturation protein SBDS	97	GEVQVSdKERHTQ
stp_pc	K	3	LIKSLEAAR	1	P62495	Eukaryotic peptide chain release factor subunit 1	22	KIKKLIkSLEAAR
stp_pc	T	5	MPAATVDHSQR	1	Q9UIV1	CCR4-NOT transcription complex subunit 7	5	MPAAtVDHSQR
stp_pc	K	2	LKVPPAINQFTQALDR	1	P62424	60S ribosomal protein L7a	75	ILYKRLkVPPAIN
stp_pc	E	5	MGSQEVLGHAAR	1	Q96AA3	Protein RFT1 homolog	5	MGSQeVLGHAA
stp_pc	S	2	KSVEVNFTESLLR	2	Q9BUL8	Programmed cell death protein 10	71	KILEKKsVEVNFT
stp_pc	K	4	MFVKGAPEGVIDR	16	P16615	Sarcoplasmic/endoplasmic reticulum calcium ATPase 2	514	MSKMFVkGAPEGV
stp_pc	Q	4	MVGQLSEGAIAAIMQK	1	P27694	Replication protein A 70 kDa DNA-binding subunit	4	MVGqLSEGAI
stp_pc	K	5	AYVTKSPVDAGK	2	Q96DG6	Carboxymethylenebutenolidase homolog	36	IKAYVTkSPVDAG
stp_pc	K	1	KLPEYNPR	1	Q9P258	Protein RCC2	513	EKEKIKkLPEYNP
stp_pc	K	7	SFDLLVKNLNGK	1	Q9HB71	Calcyclin-binding protein	118	SFDLLVkNLNGKS
stp_pc	T	1	TINKAWVESR	2	Q9HB71	Calcyclin-binding protein	209	DDDMKRtINKAWV
stp_pc	S	1	SSFYVNGLTLGGQK	3	P07737	Profilin-1	57	LVGKDRsSFYVNG
stp_pc	S	1	STGGAPTFNVTVTK	2	P07737	Profilin-1	92	MDLRTKsTGGAPT
stp_pc	K	14	STGGAPTFNVTVTKTDK	2	P07737	Profilin-1	105	FNVTVTkTDKTLV
stp_pc	K	3	TDKTLVLLMGK	8	P07737	Profilin-1	108	TVTKTDkTLVLLM
stp_pc	K	16	TFVNITPAEVGVLVGKDR	2	P07737	Profilin-1	54	VGVLVGkDRSSFY
stp_pc	K	3	LLKASIPFSVVGSNQLIEAK	2	Q15019	Septin-2	232	EQTRLLkASIPFS
stp_pc	S	2	MSKQQPTQFINPETPGYVGFANLPNQVHR	1	Q15019	Septin-2	2	MsKQQPTQ
stp_pc	K	10	TADGIVSHLKK	4	P30101	Protein disulfide-isomerase A3	129	GIVSHLkKQAGPA
stp_pc	K	2	IKLQVWDTAGQER	5	P51153	Ras-related protein Rab-13	58	IEGKKIkLQVWDT
stp_pc	K	19	EGTGSTATSSSSTAGAAGKGK	1	O15372	Eukaryotic translation initiation factor 3 subunit H	24	TAGAAGkGKGKGG
stp_pc	E	2	KEGTGSTATSSSSTAGAAGK	1	O15372	Eukaryotic translation initiation factor 3 subunit H	6	MASRKeGTGSTA
stp_pc	K	6	MDWVMKHNGPNDASDGTVR	10	P31942	Heterogeneous nuclear ribonucleoprotein H3	6	MDWVMkHNGPND
stp_pc	S	1	SEIKGFYDPPR	1	P31942	Heterogeneous nuclear ribonucleoprotein H3	94	IFRSSRsEIKGFY
stp_pc	S	1	STGEAFVQFASK	2	P31942	Heterogeneous nuclear ribonucleoprotein H3	56	MDYQGRsTGEAFV
stp_pc	K	10	DAVTYTEHAKR	1	P62805	Histone H4	78	TYTEHAkRKTVTA
stp_pc	K	8	DNIQGITKPAIR	4	P62805	Histone H4	32	NIQGITkPAIRRL
stp_pc	T	2	KTVTAMDVVYALK	3	P62805	Histone H4	81	EHAKRKtVTAMDV
stp_pc	S	2	ISGLIYEETR	1	P62805	Histone H4	48	GGVKRIsGLIYEE
stp_pc	K	12	TVTAMDVVYALKR	22	P62805	Histone H4	92	DVVYALkRQGRTL
stp_pc	K	5	LYELKAAVDGLSK	5	Q13155	Aminoacyl tRNA synthase complex-interacting multifunctional protein 2	70	KRLYELkAAVDGL
stp_pc	S	1	SYGPAPGAGHVQEESNLSLQALESR	3	Q13155	Aminoacyl tRNA synthase complex-interacting multifunctional protein 2	34	PNVHGRsYGPAPG
stp_pc	K	12	VAGQDGSVVQFKIK	4	P55854	Small ubiquitin-related modifier 3	32	GSVVQFkIKRHTP
stp_pc	K	8	NAGAVIGKGGK	1	P61978	Heterogeneous nuclear ribonucleoprotein K	60	AGAVIGkGGKNIK
stp_pc	Q	4	MGVQPPNFSWVLPGR	1	Q9BVJ7	Dual specificity protein phosphatase 23	4	MGVqPPNFSW
stp_pc	K	9	LVPVGYGIKK	3	P24534	Elongation factor 1-beta	185	PVGYGIkKLQIQC
stp_pc	K	13	SIQADGLVWGSSKLVPVGYGIK	1	P24534	Elongation factor 1-beta	176	LVWGSSkLVPVGY
stp_pc	K	4	MSNKEGSGGFR	1	Q99598	Translin-associated protein X	4	MSNkEGSGGF
stp_pc	K	3	ALKGIGTDEFTLNR	2	P12429	Annexin A3	263	RLHRALkGIGTDE
stp_pc	K	10	FVNVVPTFGKK	3	P62861	FAU ubiquitin-like and ribosomal protein S30	125	VVPTFGkKKGPNA
stp_pc	E	5	MVLLESEQFLTELTR	1	P37108	Signal recognition particle 14 kDa protein	5	MVLLeSEQFLT
stp_pc	E	9	FDVINLAAEKTYNNLDVSVTK	1	P54619	5'-AMP-activated protein kinase subunit gamma-1	252	VINLAAeKTYNNL
stp_pc	K	7	VISEAEKAK	1	Q6NVY1	3-hydroxyisobutyryl-CoA hydrolase, mitochondrial	108	VISEAEkAKQKIA
stp_pc	K	8	LQEETGAKISVLGK	5	Q07666	KH domain-containing, RNA-binding, signal transduction-associated protein 1	194	QEETGAkISVLGK
stp_pc	S	1	SGSMDPSGAHPSVR	3	Q07666	KH domain-containing, RNA-binding, signal transduction-associated protein 1	18	SRSSGRsGSMDPS
stp_pc	S	4	MPFSNSHNALK	9	P12277	Creatine kinase B-type	4	MPFsNSHNAL
stp_pc	S	21	TDLNPDNLQGGDDLDPNYVLSSR	1	P12277	Creatine kinase B-type	128	DPNYVLsSRVRTG
stp_pc	S	2	KSLESINSR	3	P62888	60S ribosomal protein L30	10	AKKTKKsLESINS
stp_pc	K	5	MTVGKSSK	1	P14678	Small nuclear ribonucleoprotein-associated proteins B and B'	5	MTVGkSSKMLQ
stp_pc	K	6	LIDTVKDPVSK	1	P19784	Casein kinase II subunit alpha'	103	KLIDTVkDPVSKT
stp_pc	K	2	IKDYDANFK	4	Q9BRJ2	39S ribosomal protein L45, mitochondrial	126	VSIRRIkDYDANF
stp_pc	K	3	YLKDVTLQK	4	P18621	60S ribosomal protein L17	49	KATKYLkDVTLQK
stp_pc	K	14	SLLGDSAPTLHLNKGTPSQSPVVGR	1	P52594	Arf-GAP domain and FG repeat-containing protein 1	175	PTLHLNkGTPSQS
stp_pc	K	8	GIVEFASKPAAR	4	P23246	Splicing factor, proline- and glutamine-rich	421	IVEFASkPAARKA
stp_pc	K	3	ISKEIGGDVQK	2	Q01518	Adenylyl cyclase-associated protein 1	63	EYLKISkEIGGDV
stp_pc	K	3	NLKVTAVPTLLK	2	Q9BRA2	Thioredoxin domain-containing protein 17	89	DFRKNLkVTAVPT
stp_pc	K	2	GKTPEEIRK	1	P63208	S-phase kinase-associated protein 1	130	ANMIKGkTPEEIR
stp_pc	K	2	VKSINNPDMR	2	P53396	ATP-citrate synthase	978	GIGHRVkSINNPD
stp_pc	K	5	LVGGKDFEQPLAISR	2	O00151	PDZ and LIM domain protein 1	22	FRLVGGkDFEQPL
stp_pc	T	2	MTTQQIDLQGPGPWGFR	1	O00151	PDZ and LIM domain protein 1	2	MtTQQIDL
stp_pc	S	11	APILIATDVASR	4	Q92841	Probable ATP-dependent RNA helicase DDX17	479	IATDVAsRGLDVE
stp_pc	S	1	SSQSSSQQFSGIGR	1	Q92841	Probable ATP-dependent RNA helicase DDX17	671	TTSTGRsSQSSSQ
stp_pc	K	7	MASLTVKAYLLGK	8	Q13501	Sequestosome-1	7	MASLTVkAYLLGK
stp_pc	K	5	AIVEKLR	1	P12956	X-ray repair cross-complementing protein 6	468	MKAIVEkLRFTYR
stp_pc	K	8	TEMDWVLKHSGPNSADSANDGFVR	1	P52597	Heterogeneous nuclear ribonucleoprotein F	98	EMDWVLkHSGPNS
stp_pc	K	5	MTAIKHALQR	1	Q9NV70	Exocyst complex component 1	5	MTAIkHALQRD
stp_pc	K	7	ALSTGEKGFGYK	2	P62937	Peptidyl-prolyl cis-trans isomerase A	44	ALSTGEkGFGYKG
stp_pc	T	4	HNGTGGKSIYGEK	1	P62937	Peptidyl-prolyl cis-trans isomerase A	73	FTRHNGtGGKSIY
stp_pc	K	7	HNGTGGKSIYGEKFEDENFILK	5	P62937	Peptidyl-prolyl cis-trans isomerase A	76	HNGTGGkSIYGEK
stp_pc	N	3	MVNPTVFFDIAVDGEPLGR	8	P62937	Peptidyl-prolyl cis-trans isomerase A	3	MVnPTVFFD
stp_pc	S	1	SIYGEKFEDENFILK	7	P62937	Peptidyl-prolyl cis-trans isomerase A	77	NGTGGKsIYGEKF
stp_pc	T	1	TEWLDGK	6	P62937	Peptidyl-prolyl cis-trans isomerase A	119	FICTAKtEWLDGK
stp_pc	K	7	TEWLDGKHVVFGK	16	P62937	Peptidyl-prolyl cis-trans isomerase A	125	TEWLDGkHVVFGK
stp_pc	K	2	VKEGMNIVEAMER	21	P62937	Peptidyl-prolyl cis-trans isomerase A	133	VVFGKVkEGMNIV
stp_pc	K	9	VSFELFADKVPK	22	P62937	Peptidyl-prolyl cis-trans isomerase A	28	FELFADkVPKTAE
stp_pc	K	4	VNGKAGNLGGGVVTIER	2	P35268	60S ribosomal protein L22	52	RIKVNGkAGNLGG
stp_pc	N	4	VVANSKESYELR	1	P35268	60S ribosomal protein L22	105	WLRVVAnSKESYE
stp_pc	D	5	MAPLDLDKYVEIAR	2	O00743	Serine/threonine-protein phosphatase 6 catalytic subunit	5	MAPLdLDKYVE
stp_pc	K	10	DGANIVIAAKTAQPHPK	5	Q6YN16	Hydroxysteroid dehydrogenase-like protein 2	42	NIVIAAkTAQPHP
stp_pc	D	3	KVDIIADAAYSIFQKPK	1	Q6YN16	Hydroxysteroid dehydrogenase-like protein 2	222	SQCRKVdIIADAA
stp_pc	Q	1	QIHKFEELNR	1	Q9Y262	Eukaryotic translation initiation factor 3 subunit L	546	GDFFIRqIHKFEE
stp_pc	K	4	AVTKYTSSK	1	P62807	Histone H2B type 1-C/E/F/G/I	121	GTKAVTkYTSSK
stp_pc	K	8	HAVSEGTKAVTK	1	P62807	Histone H2B type 1-C/E/F/G/I	117	AVSEGTkAVTKYT
stp_pc	E	2	KESYSVYVYK	2	P62807	Histone H2B type 1-C/E/F/G/I	36	RKRSRKeSYSVYV
stp_pc	K	9	LLLPGELAKHAVSEGTK	8	P62807	Histone H2B type 1-C/E/F/G/I	109	LPGELAkHAVSEG
stp_pc	E	3	MPEPAKSAPAPK	2	P62807	Histone H2B type 1-C/E/F/G/I	3	MPePAKSAP
stp_pc	K	3	VLKQVHPDTGISSK	2	P62807	Histone H2B type 1-C/E/F/G/I	47	YVYKVLkQVHPDT
stp_pc	K	9	ASAALEKLK	1	A6NDU8	RAB7A-interacting MON1-CCZ1 complex subunit 1	48	AALEKLkLLCGEE
stp_pc	S	7	MAAAVSSVVR	2	A6NDU8	RAB7A-interacting MON1-CCZ1 complex subunit 1	7	MAAAVSsVVRRVE
stp_pc	K	4	ADGKISEQSDAK	1	P25705	ATP synthase subunit alpha, mitochondrial	531	TIRADGkISEQSD
stp_pc	K	12	VVDALGNAIDGKGPIGSK	2	P25705	ATP synthase subunit alpha, mitochondrial	161	GNAIDGkGPIGSK
stp_pc	Y	8	AIAELGIYPAVDPLDSTSR	1	P06576	ATP synthase subunit beta, mitochondrial	395	IAELGIyPAVDPL
stp_pc	K	9	VLDSGAPIKIPVGPETLGR	2	P06576	ATP synthase subunit beta, mitochondrial	133	DSGAPIkIPVGPE
stp_pc	K	2	VKPFMTGAAEQIK	1	P13693	Translationally-controlled tumor protein	112	QRPERVkPFMTGA
stp_pc	K	3	YIKDYMK	4	P13693	Translationally-controlled tumor protein	93	AYKKYIkDYMKSI
stp_pc	K	8	MADVVVGKDKGGEQR	2	Q9NRG0	Chromatin accessibility complex protein 1	8	ADVVVGkDKGGEQ
stp_pc	Y	12	NGSEADIDEGLYSR	6	P22314	Ubiquitin-like modifier-activating enzyme 1	55	DIDEGLySRQLYV
stp_pc	K	11	QLYVLGHEAMKR	2	P22314	Ubiquitin-like modifier-activating enzyme 1	68	LGHEAMkRLQTSS
stp_pc	K	2	LKDQNIFVSR	4	Q9NW13	RNA-binding protein 28	478	LKHQKLkDQNIFV
stp_pc	Y	10	IADQFLGAMYTLPR	1	O60341	Lysine-specific histone demethylase 1A	834	QFLGAMyTLPRQA
stp_pc	N	2	KNGVQAMVEFDSVQSAQR	1	P14866	Heterogeneous nuclear ribonucleoprotein L	230	IVIFRKnGVQAMV
stp_pc	K	5	VFSGKSER	1	P14866	Heterogeneous nuclear ribonucleoprotein L	538	VKVFSGkSERSSS
stp_pc	R	11	LVDEEPQLTKR	2	Q9UG63	ATP-binding cassette sub-family F member 2	619	EPQLTKrTHNV
stp_pc	R	2	ARMEELR	1	Q9P219	Protein Daple	348	VDFYKArMEELRE
stp_pc	K	7	VIDYAVKIR	3	P38117	Electron transfer flavoprotein subunit beta	19	VIDYAVkIRVKPD
stp_pc	K	1	KLNEISK	1	P17931	Galectin-3	227	YNHRVKkLNEISK
stp_pc	S	2	KSADTLWGIQK	7	P00338	L-lactate dehydrogenase A chain	319	EARLKKsADTLWG
stp_pc	K	5	IVSGKDYNVTANSK	2	P00338	L-lactate dehydrogenase A chain	81	PKIVSGkDYNVTA
stp_pc	K	5	MATLKDQLIYNLLKEEQTPQNK	1	P00338	L-lactate dehydrogenase A chain	5	MATLkDQLIYN
stp_pc	K	11	QVVESAYEVIK	1	P00338	L-lactate dehydrogenase A chain	243	SAYEVIkLKGYTS
stp_pc	S	5	VTLTSEEEAR	1	P00338	L-lactate dehydrogenase A chain	310	VKVTLTsEEEARL
stp_pc	S	2	LSKEEIER	1	P0DMV9	Heat shock 70 kDa protein 1B	511	NDKGRLsKEEIER
stp_pc	K	15	NQVALNPQNTVFDAKR	1	P0DMV9	Heat shock 70 kDa protein 1B	71	NTVFDAkRLIGRK
stp_pc	K	10	VQVSYKGETK	1	P0DMV9	Heat shock 70 kDa protein 1B	112	SYKGETkAFYPEE
stp_pc	E	4	MAPEVLPKPR	9	P09669	Cytochrome c oxidase subunit 6C	4	MAPeVLPKPR
stp_pc	K	3	AGKITDEEATK	1	P08237	ATP-dependent 6-phosphofructokinase, muscle type	144	DLQKAGkITDEEA
stp_pc	N	1	NFATKMGAK	3	P08237	ATP-dependent 6-phosphofructokinase, muscle type	674	PTPFDRnFATKMG
stp_pc	K	5	NFATKMGAK	1	P08237	ATP-dependent 6-phosphofructokinase, muscle type	678	DRNFATkMGAKAM
stp_pc	K	2	LKAQLGPDESK	2	P12081	Histidine--tRNA ligase, cytoplasmic	42	AKLLKLkAQLGPD
stp_pc	K	19	ELASQPDVDGFLVGGASLKPEFVDIINAK	3	P60174	Triosephosphate isomerase	238	VGGASLkPEFVDI
stp_pc	S	1	SNVSDAVAQSTR	1	P60174	Triosephosphate isomerase	195	LRGWLKsNVSDAV
stp_pc	R	12	NLENEQPVHLLRPGPGPEGLR	1	Q8NI38	NF-kappa-B inhibitor delta	289	QPVHLLrPGPGPE
stp_pc	N	1	NKHEAMITDLEER	1	P35579	Myosin-9	1023	SLAKLKnKHEAMI
stp_pc	K	8	EAESLIAKK	2	P78371	T-complex protein 1 subunit beta	119	AESLIAkKIHPQT
stp_pc	S	3	MASLSLAPVNIFK	2	P78371	T-complex protein 1 subunit beta	3	MAsLSLAPV
stp_pc	K	13	MASLSLAPVNIFKAGADEER	1	P78371	T-complex protein 1 subunit beta	13	APVNIFkAGADEE
stp_pc	K	6	VDNIIKAAPR	2	P78371	T-complex protein 1 subunit beta	522	RVDNIIkAAPRKR
stp_pc	K	22	MADQLTEEQIAEFKEAFSLFDKDGDGTITTK	2	P0DP25	Calmodulin-3	22	AFSLFDkDGDGTI
stp_pc	K	13	LEVAPISDIIAIKSPDTFVR	2	P13804	Electron transfer flavoprotein subunit alpha, mitochondrial	139	SDIIAIkSPDTFV
stp_pc	K	1	KALTEPEAR	6	P53350	Serine/threonine-protein kinase PLK1	146	ELHKRRkALTEPE
stp_pc	K	9	MSAAVTAGKLAR	1	P53350	Serine/threonine-protein kinase PLK1	9	AAVTAGkLARAPA
stp_pc	K	6	MAAAAKPNNLSLVVHGPGDLR	1	Q00796	Sorbitol dehydrogenase	6	MAAAAkPNNLSL
stp_pc	S	6	DANGNSFATR	1	P62701	40S ribosomal protein S4, X isoform	217	KDANGNsFATRLS
stp_pc	K	9	LTIAEERDKR	2	P62701	40S ribosomal protein S4, X isoform	254	IAEERDkRLAAKQ
stp_pc	K	9	YALTGDEVKK	2	P62701	40S ribosomal protein S4, X isoform	62	LTGDEVkKICMQR
stp_pc	K	3	AIKLTVNDFVR	2	Q9UJS0	Electrogenic aspartate/glutamate antiporter SLC25A13, mitochondrial	408	APEKAIkLTVNDF
stp_pc	K	6	SDPDPKAPANK	1	P11310	Medium-chain specific acyl-CoA dehydrogenase, mitochondrial	212	RSDPDPkAPANKA
stp_pc	S	2	MSDFDEFER	3	P26368	Splicing factor U2AF 65 kDa subunit	2	MsDFDEFE
stp_pc	H	2	IHSLPPEGK	16	P10176	Cytochrome c oxidase subunit 8A, mitochondrial	27	VPRAKIhSLPPEG
stp_pc	K	5	MAAVKTLNPK	14	P40227	T-complex protein 1 subunit zeta	5	MAAVkTLNPKA
stp_pc	S	1	SETDTSLIR	1	P40227	T-complex protein 1 subunit zeta	200	MEMKHKsETDTSL
stp_pc	K	5	TLNPKAEVAR	1	P40227	T-complex protein 1 subunit zeta	10	VKTLNPkAEVARA
stp_pc	K	9	AALQELLSKGLIK	5	P62851	40S ribosomal protein S25	94	LQELLSkGLIKLV
stp_pc	K	19	MASGVTVNDEVIKVFNDMKVR	1	Q9Y281	Cofilin-2	19	KVFNDMkVRKSST
stp_pc	K	13	AITGASLADIMAKR	11	P83731	60S ribosomal protein L24	93	LADIMAkRNQKPE
stp_pc	K	1	KGQSEEIQK	1	P83731	60S ribosomal protein L24	61	YRRKHKkGQSEEI
stp_pc	K	2	AKEILTNEESR	2	Q9UKB3	DnaJ homolog subfamily C member 12	63	QKLQKAkEILTNE
stp_pc	K	1	KAPVILEK	3	Q86TC9	Myopalladin	1170	VAKEVKkAPVILE
stp_pc	K	12	ELIQKELTIGSKLQDAEIAR	1	P06703	Protein S100-A6	47	ELTIGSkLQDAEI
stp_pc	K	2	GKLDGNQDLIR	4	P48735	Isocitrate dehydrogenase [NADP], mitochondrial	384	GLEHRGkLDGNQD
stp_pc	K	10	MATFISVQLKK	2	Q8WUM4	Programmed cell death 6-interacting protein	10	FISVQLkKTSEVD
stp_pc	K	8	TSEVDLAKPLVK	1	Q8WUM4	Programmed cell death 6-interacting protein	19	SEVDLAkPLVKFI
stp_pc	K	8	ALDFIASKGVK	1	O43707	Alpha-actinin-4	122	LDFIASkGVKLVS
stp_pc	K	8	EAILAIHKEAQR	1	O43707	Alpha-actinin-4	592	AILAIHkEAQRIA
stp_pc	K	3	GVKLVSIGAEEIVDGNAK	1	O43707	Alpha-actinin-4	125	IASKGVkLVSIGA
stp_pc	K	8	IAESNHIKLSGSNPYTTVTPQIINSK	1	O43707	Alpha-actinin-4	604	AESNHIkLSGSNP
stp_pc	K	7	LDHLAEKFR	1	O43707	Alpha-actinin-4	417	LDHLAEkFRQKAS
stp_pc	K	10	LLAEPVPGIKAEPDESNAR	3	Q5JXB2	Putative ubiquitin-conjugating enzyme E2 N-like	24	EPVPGIkAEPDES
stp_pc	E	1	ELKTDSSPNQAR	1	P26599	Polypyrimidine tract-binding protein 1	135	QFSNHKeLKTDSS
stp_pc	K	1	KLPIDVTEGEVISLGLPFGK	1	P26599	Polypyrimidine tract-binding protein 1	65	RVIHIRkLPIDVT
stp_pc	K	5	VSFSKSTI	3	P26599	Polypyrimidine tract-binding protein 1	554	LRVSFSkSTI
stp_pc	K	2	FKDPNAPK	1	P09429	High mobility group protein B1	90	ETKKKFkDPNAPK
stp_pc	K	2	GKFEDMAK	8	P09429	High mobility group protein B1	59	SAKEKGkFEDMAK
stp_pc	K	1	KHPDASVNFSEFSK	1	P09429	High mobility group protein B1	30	REEHKKkHPDASV
stp_pc	H	2	KHPDASVNFSEFSKK	11	P09429	High mobility group protein B1	31	EEHKKKhPDASVN
stp_pc	K	1	KLGEMWNNTAADDKQPYEK	9	P09429	High mobility group protein B1	128	IGDVAKkLGEMWN
stp_pc	K	2	IKGEHPGLSIGDVAK	9	P09429	High mobility group protein B1	114	EYRPKIkGEHPGL
stp_pc	K	6	TYIPPKGETK	3	P09429	High mobility group protein B1	82	KTYIPPkGETKKK
stp_pc	K	3	YEKDIAAYR	1	P09429	High mobility group protein B1	157	LKEKYEkDIAAYR
stp_pc	K	7	ILPAGGKVLTSEDEYNLLSDR	1	Q9BZQ8	Protein Niban 1	124	ILPAGGkVLTSED
stp_pc	K	7	TAVAIEKVK	1	Q9BZQ8	Protein Niban 1	475	TAVAIEkVKLRVL
stp_pc	K	3	VLKQYDYDSSTIR	1	Q9BZQ8	Protein Niban 1	482	VKLRVLkQYDYDS
stp_pc	K	11	EVSSSFDHVIKETTR	2	Q9Y6C9	Mitochondrial carrier homolog 2	122	SFDHVIkETTREM
stp_pc	T	4	MPVTEKDLAEDAPWK	15	O75369	Filamin-B	4	MPVtEKDLAE
stp_pc	K	2	VKVDPSHDASK	1	O75369	Filamin-B	838	ASPFRVkVDPSHD
stp_pc	K	2	VKVEPAVDTSR	4	O75369	Filamin-B	1221	HFPARVkVEPAVD
stp_pc	K	15	DISEASVFDAYVLPKLYVK	1	P62854	40S ribosomal protein S26	66	DAYVLPkLYVKLH
stp_pc	K	6	EDLYLKPIQR	1	P13639	Elongation factor 2	445	KEDLYLkPIQRTI
stp_pc	K	12	EGIPALDNFLDKL	1	P13639	Elongation factor 2	857	LDNFLDkL
stp_pc	K	4	FAAKGEGQLGPAER	2	P13639	Elongation factor 2	239	VAKFAAkGEGQLG
stp_pc	N	3	MVNFTVDQIR	4	P13639	Elongation factor 2	3	MVnFTVDQI
stp_pc	K	6	VAVEAKNPADLPK	8	P13639	Elongation factor 2	512	RVAVEAkNPADLP
stp_pc	K	11	VFSGLVSTGLKVR	2	P13639	Elongation factor 2	426	LVSTGLkVRIMGP
stp_pc	K	5	LNEAKIK	2	Q03001	Dystonin	3734	QKLNEAkIKCEQL
stp_pc	Q	5	MAPGQLALFSVSDKTGLVEFAR	1	P31939	Bifunctional purine biosynthesis protein ATIC	5	MAPGqLALFSV
stp_pc	C	2	GCTATLGNFAK	1	P15880	40S ribosomal protein S2	229	YTSARGcTATLGN
stp_pc	K	13	AVAVVVDPIQSVKGK	3	O00487	26S proteasome non-ATPase regulatory subunit 14	152	DPIQSVkGKVVID
stp_pc	K	10	DDSNLYINVKLK	2	P11586	C-1-tetrahydrofolate synthase, cytoplasmic	56	NLYINVkLKAAEE
stp_pc	K	1	KITIGQAPTEK	4	P11586	C-1-tetrahydrofolate synthase, cytoplasmic	543	NDRFLRkITIGQA
stp_pc	K	1	KVVGDVAYDEAKER	1	P11586	C-1-tetrahydrofolate synthase, cytoplasmic	251	KKPNGRkVVGDVA
stp_pc	K	10	MAPAEILNGKEISAQIR	1	P11586	C-1-tetrahydrofolate synthase, cytoplasmic	10	AEILNGkEISAQI
stp_pc	K	8	AAALEAMKDYTK	1	P31948	Stress-induced-phosphoprotein 1	442	AALEAMkDYTKAM
stp_pc	K	7	DFDTALKHYDK	2	P31948	Stress-induced-phosphoprotein 1	246	DFDTALkHYDKAK
stp_pc	K	1	KAAALEAMKDYTK	2	P31948	Stress-induced-phosphoprotein 1	434	IKGYTRkAAALEA
stp_pc	K	8	MEQVNELKEK	4	P31948	Stress-induced-phosphoprotein 1	8	EQVNELkEKGNKA
stp_pc	K	6	TPDVLKK	1	P31948	Stress-induced-phosphoprotein 1	337	RTPDVLkKCQQAE
stp_pc	K	13	ALGQNPTNAEVLKVLGNPK	4	P60660	Myosin light polypeptide 6	50	TNAEVLkVLGNPK
stp_pc	N	7	VFDKEGNGTVMGAEIR	1	P60660	Myosin light polypeptide 6	101	VFDKEGnGTVMGA
stp_pc	N	4	VLGNPKSDEMNVK	1	P60660	Myosin light polypeptide 6	54	VLKVLGnPKSDEM
stp_pc	K	11	LEIEPEWAYGKK	3	Q00688	Peptidyl-prolyl cis-trans isomerase FKBP3	200	PEWAYGkKGQPDA
stp_pc	K	3	LVKPGNQNTQVTEAWNK	2	Q9UQ80	Proliferation-associated protein 2G4	158	AALRLVkPGNQNT
stp_pc	K	20	MSGEDEQQEQTIAEDLVVTKYK	1	Q9UQ80	Proliferation-associated protein 2G4	20	EDLVVTkYKMGGD
stp_pc	K	7	IASDGLKGR	2	P61247	40S ribosomal protein S3a	63	IASDGLkGRVFEV
stp_pc	K	2	MKFNPFVTSDR	2	P61254	60S ribosomal protein L26	2	MkFNPFVT
stp_pc	K	6	GLVLGKLGK	3	P55786	Puromycin-sensitive aminopeptidase	712	RGLVLGkLGKAGH
stp_pc	S	1	SSGAPETLQR	5	Q9BW92	Threonine--tRNA ligase, mitochondrial	266	SSSLWRsSGAPET
stp_pc	S	2	SSGAPETLQR	2	Q9BW92	Threonine--tRNA ligase, mitochondrial	267	SSLWRSsGAPETL
stp_pc	K	2	IKIIAPPER	8	Q562R1	Beta-actin-like protein 2	329	PSTMKIkIIAPPE
stp_pc	K	1	KIFVGGLSPDTPEEK	1	Q14103	Heterogeneous nuclear ribonucleoprotein D0	183	TKEPVKkIFVGGL
stp_pc	S	7	MAAGPISER	4	Q15427	Splicing factor 3B subunit 4	7	MAAGPIsERNQDA
stp_pc	K	5	AALDKATVLLSMSK	1	Q53EL6	Programmed cell death protein 4	297	ARAALDkATVLLS
stp_pc	K	3	LGKPGLGGSSGLAGAWLK	1	P16455	Methylated-DNA--protein-cysteine methyltransferase	178	EGHRLGkPGLGGS
stp_pc	K	7	MSSGNAKIGHPAPNFK	1	Q06830	Peroxiredoxin-1	7	MSSGNAkIGHPAP
stp_pc	K	16	QGGLGPMNIPLVSDPKR	2	Q06830	Peroxiredoxin-1	109	PLVSDPkRTIAQD
stp_pc	K	10	TIAQDYGVLKADEGISFR	11	Q06830	Peroxiredoxin-1	120	QDYGVLkADEGIS
stp_pc	K	8	MAVSTGVKVPR	5	Q15819	Ubiquitin-conjugating enzyme E2 variant 2	8	AVSTGVkVPRNFR
stp_pc	K	13	GGPNIITLADIVKDPVSR	2	P68400	Casein kinase II subunit alpha	102	TLADIVkDPVSRT
stp_pc	K	18	MTEWETAAPAVAETPDIKLFGK	1	P46782	40S ribosomal protein S5	18	AETPDIkLFGKWS
stp_pc	Q	2	KQVVNIPSFIVR	1	P46781	40S ribosomal protein S9	140	HIRVRKqVVNIPS
stp_pc	D	2	LDSQKHIDFSLR	4	P46781	40S ribosomal protein S9	152	SFIVRLdSQKHID
stp_pc	Q	2	KQPVEVDHDQLEQFR	6	Q9Y2D0	Carbonic anhydrase 5B, mitochondrial	250	TWIIKKqPVEVDH
stp_pc	K	8	EAKEMLQKLR	1	Q8WWL2	Protein spire homolog 2	219	AKEMLQkLREDEP
stp_pc	K	15	MAAEPNKTEIQTLFKR	2	Q8N6H7	ADP-ribosylation factor GTPase-activating protein 2	15	EIQTLFkRLRAVP
stp_pc	K	3	AAKLLYESR	1	Q9BQ24	Zinc finger FYVE domain-containing protein 21	226	AMHKAAkLLYESR
stp_pc	Y	13	YLNTNPVGGLLEYAR	3	P55265	Double-stranded RNA-specific adenosine deaminase	734	VGGLLEyARSHGF
stp_pc	K	11	MAVEELQSIIKR	1	Q92990	Glomulin	11	ELQSIIkRCQILE
stp_pc	K	12	MGAVTDDEVIRKR	1	Q6I9Y2	THO complex subunit 7 homolog	12	DDEVIRkRLLIDG
stp_pc	K	8	MAEEEVAKLEK	1	Q9P2R3	Rabankyrin-5	8	AEEEVAkLEKHLM
stp_pc	T	9	AVFVDLEPTVIDEVR	3	P68363	Tubulin alpha-1B chain	73	FVDLEPtVIDEVR
stp_pc	K	10	DVNAAIATIKTK	7	P68363	Tubulin alpha-1B chain	336	AAIATIkTKRSIQ
stp_pc	Y	29	EDMAALEKDYEEVGVDSVEGEGEEEGEEY	3	P68363	Tubulin alpha-1B chain	451	EEEGEEy
stp_pc	K	6	GDVVPKDVNAAIATIK	9	P68363	Tubulin alpha-1B chain	326	RGDVVPkDVNAAI
stp_pc	K	4	LDHKFDLMYAK	10	P68363	Tubulin alpha-1B chain	394	WARLDHkFDLMYA
stp_pc	D	2	LDHKFDLMYAK	7	P68363	Tubulin alpha-1B chain	392	EAWARLdHKFDLM
stp_pc	K	7	LSVDYGKK	2	P68363	Tubulin alpha-1B chain	163	LSVDYGkKSKLEF
stp_pc	K	20	TIGGGDDSFNTFFSETGAGKHVPR	7	P68363	Tubulin alpha-1B chain	60	SETGAGkHVPRAV
stp_pc	T	9	VGINYQPPTVVPGGDLAK	1	P68363	Tubulin alpha-1B chain	361	INYQPPtVVPGGD
stp_pc	K	18	VGINYQPPTVVPGGDLAKVQR	2	P68363	Tubulin alpha-1B chain	370	PGGDLAkVQRAVC
stp_pc	K	4	DLAKDITSDTSGDFR	2	P04083	Annexin A1	166	LKRDLAkDITSDT
stp_pc	S	5	MAMVSEFLK	5	P04083	Annexin A1	5	MAMVsEFLKQA
stp_pc	K	8	NALLSLAKGDRSEDFGVNEDLADSDAR	1	P04083	Annexin A1	185	ALLSLAkGDRSED
stp_pc	K	16	LLSDATVEKDESHAGKVVLR	2	Q14320	Protein FAM50A	305	DESHAGkVVLRSW
stp_pc	K	5	MAQYKGAASEAGR	2	Q14320	Protein FAM50A	5	MAQYkGAASEA
stp_pc	K	1	KAGAEVVK	1	P54577	Tyrosine--tRNA ligase, cytoplasmic	147	TQHDSKkAGAEVV
stp_pc	N	4	AAINQKLIETGERER	1	Q9NPA8	Transcription and mRNA export factor ENY2	17	QMRAAInQKLIET
stp_pc	K	17	GLEHVTVDDLVAEITPKGR	3	Q9NPA8	Transcription and mRNA export factor ENY2	74	VAEITPkGRALVP
stp_pc	K	9	AAALASLKK	1	O15269	Serine palmitoyltransferase 1	127	ALASLKkYGVGTC
stp_pc	K	1	KALDIAENEMPGLMR	11	P23526	Adenosylhomocysteinase	20	LAAWGRkALDIAE
stp_pc	S	15	MTTSGALFPSLVPGSR	1	Q16186	Proteasomal ubiquitin receptor ADRM1	15	PSLVPGsRGASNK
stp_pc	K	10	MPILGLGTWKSPPGQVTEAVK	10	P15121	Aldo-keto reductase family 1 member B1	22	LGLGTWkSPPGQV
stp_pc	K	7	NLVVIPKSVTPER	14	P15121	Aldo-keto reductase family 1 member B1	263	NLVVIPkSVTPER
stp_pc	K	4	VLQKLGADAVGMSTVPEVIVAR	1	P00491	Purine nucleoside phosphorylase	211	ECRVLQkLGADAV
stp_pc	E	8	MPVAVMAESAFSFKK	4	Q99627	COP9 signalosome complex subunit 8	8	PVAVMAeSAFSFK
stp_pc	K	9	ETVGFGMLKAK	4	Q9Y2Q5	Ragulator complex protein LAMTOR2	105	VGFGMLkAKAQAL
stp_pc	K	7	EQLAALKK	5	Q9UII2	ATPase inhibitor, mitochondrial	71	EQLAALkKHHEEE
stp_pc	K	2	AKIELLGSYDPQK	1	P24666	Low molecular weight phosphotyrosine protein phosphatase	113	VKTCKAkIELLGS
stp_pc	N	16	FTNLLTSILDSAETKN	1	Q16719	Kynureninase	465	DSAETKn
stp_pc	K	15	MASGAGGVGGGGGGKIR	1	P49790	Nuclear pore complex protein Nup153	15	GGGGGGkIRTRRC
stp_pc	K	4	IGEKYVDMSVK	1	P48047	ATP synthase subunit O, mitochondrial	192	IVRIGEkYVDMSV
stp_pc	K	8	SLNDITAKER	2	P48047	ATP synthase subunit O, mitochondrial	98	LNDITAkERFSPL
stp_pc	K	2	VKSLNDITAK	1	P48047	ATP synthase subunit O, mitochondrial	90	KRSIKVkSLNDIT
stp_pc	K	9	GPSSVEDIKAK	4	P06748	Nucleophosmin	248	SSVEDIkAKMQAS
stp_pc	K	4	VEAKFINYVK	2	P06748	Nucleophosmin	267	LPKVEAkFINYVK
stp_pc	K	1	KFNALFAQGNYSEAAK	2	Q00610	Clathrin heavy chain 1	367	EELFARkFNALFA
stp_pc	K	5	VIALKAGK	1	Q00610	Clathrin heavy chain 1	83	SKVIALkAGKTLQ
stp_pc	K	7	EVAPVPKIH	2	Q15274	Nicotinate-nucleotide pyrophosphorylase [carboxylating]	295	EVAPVPkIH
stp_pc	K	10	LVLYPSAQEKVLQR	1	Q6L8Q7	2',5'-phosphodiesterase 12	427	YPSAQEkVLQRSS
stp_pc	K	7	LLTWDVKDTLLR	2	Q9BSH5	Haloacid dehalogenase-like hydrolase domain-containing protein 3	15	LLTWDVkDTLLRL
stp_pc	K	10	FDVSSTSVFKQR	2	Q96TA1	Protein Niban 2	430	SSTSVFkQRAQIH
stp_pc	Y	2	KYDYDSSSVR	2	Q96TA1	Protein Niban 2	480	ERVLKKyDYDSSS
stp_pc	K	3	VLKKYDYDSSSVR	1	Q96TA1	Protein Niban 2	478	VLERVLkKYDYDS
stp_pc	K	10	ALELDSNNEKGLFR	2	Q02790	Peptidyl-prolyl cis-trans isomerase FKBP4	354	LDSNNEkGLFRRG
stp_pc	K	3	MAKISSPTETER	7	P31949	Protein S100-A11	3	MAkISSPTE
stp_pc	K	3	NQKDPGVLDR	3	P31949	Protein S100-A11	55	AFTKNQkDPGVLD
stp_pc	S	13	QQSEEDLLLQDFSR	2	Q9UNL2	Translocon-associated protein subunit gamma	21	LLLQDFsRNLSAK
stp_pc	K	12	VYVGNLGNNGNKTELER	1	P84103	Serine/arginine-rich splicing factor 3	23	LGNNGNkTELERA
stp_pc	E	5	MAGPESDAQYQFTGIK	17	Q96IX5	ATP synthase membrane subunit K, mitochondrial	5	MAGPeSDAQYQ
stp_pc	K	16	MAGPESDAQYQFTGIKK	1	Q96IX5	ATP synthase membrane subunit K, mitochondrial	16	YQFTGIkKYFNSY
stp_pc	K	9	GIYAYGFEKPSAIQQR	2	P38919	Eukaryotic initiation factor 4A-III	60	YAYGFEkPSAIQQ
stp_pc	K	1	KGVAINFVKNDDIR	1	P38919	Eukaryotic initiation factor 4A-III	374	SGRYGRkGVAINF
stp_pc	K	1	KVDWLTEK	2	P38919	Eukaryotic initiation factor 4A-III	289	FCNTKRkVDWLTE
stp_pc	S	12	MATTATMATSGSAR	1	P38919	Eukaryotic initiation factor 4A-III	12	TMATSGsARKRLL
stp_pc	K	2	AKGLVPEDDTKEK	2	Q15459	Splicing factor 3A subunit 1	533	EAIHKAkGLVPED
stp_pc	Q	7	MPAGPVQAVPPPPPVPTEPK	2	Q15459	Splicing factor 3A subunit 1	7	MPAGPVqAVPPPP
stp_pc	N	1	NIVDKTASFVAR	1	Q15459	Splicing factor 3A subunit 1	51	PPPEVRnIVDKTA
stp_pc	S	1	SINQPVAFVR	1	Q9GZT3	SRA stem-loop-interacting RNA-binding protein, mitochondrial	15	AAALRRsINQPVA
stp_pc	K	11	MADAAASPVGKR	1	Q7LBC6	Lysine-specific demethylase 3B	11	AASPVGkRLLLLF
stp_pc	K	12	GGPSPGDVEAIKNAIANASTLAEVER	1	P09661	U2 small nuclear ribonucleoprotein A'	205	GDVEAIkNAIANA
stp_pc	K	2	LKQQSELQSQVR	4	Q14847	LIM and SH3 domain protein 1	75	PENLRLkQQSELQ
stp_pc	K	9	TQDQISNIKYHEEFEK	4	Q14847	LIM and SH3 domain protein 1	121	DQISNIkYHEEFE
stp_pc	Y	1	YKEEFEK	1	Q14847	LIM and SH3 domain protein 1	86	LQSQVRyKEEFEK
stp_pc	K	9	GIYAYGFEKPSAIQQR	2	Q14240	Eukaryotic initiation factor 4A-II	55	YAYGFEkPSAIQQ
stp_pc	S	10	GYDVIAQAQSGTGK	2	Q14240	Eukaryotic initiation factor 4A-II	79	VIAQAQsGTGKTA
stp_pc	K	1	KVDWLTEK	2	Q14240	Eukaryotic initiation factor 4A-II	285	FLNTRRkVDWLTE
stp_pc	Y	8	MSGGSADYNR	1	Q14240	Eukaryotic initiation factor 4A-II	8	SGGSADyNREHGG
stp_pc	S	11	APILIATDVASR	4	P17844	Probable ATP-dependent RNA helicase DDX5	402	IATDVAsRGLDVE
stp_pc	K	9	EANQAINPKLLQLVEDR	3	P17844	Probable ATP-dependent RNA helicase DDX5	470	NQAINPkLLQLVE
stp_pc	K	12	LQNLQLQPGNAKL	1	P22307	Sterol carrier protein 2	546	LQPGNAkL
stp_pc	K	11	TLRPALVGVVKEA	1	Q9HAV7	GrpE protein homolog 1, mitochondrial	215	ALVGVVkEA
stp_pc	K	9	AAQASDLEKIHLDEK	1	P37837	Transaldolase	286	QASDLEkIHLDEK
stp_pc	K	9	SGNLTEDDKHNNAK	1	P13797	Plastin-3	582	NLTEDDkHNNAKY
stp_pc	T	7	SSDIAKTFR	2	P13797	Plastin-3	92	SSDIAKtFRKAIN
stp_pc	K	12	VYALPEDLVEVKPK	1	P13797	Plastin-3	611	EDLVEVkPKMVMT
stp_pc	Y	5	MAYAYLFK	2	P61019	Ras-related protein Rab-2A	5	MAYAyLFKYII
stp_pc	K	3	QIKLQIWDTAGQESFR	1	P61019	Ras-related protein Rab-2A	56	IDGKQIkLQIWDT
stp_pc	K	14	AAAEVNQDYGLDPKIANAIMK	2	P07954	Fumarate hydratase, mitochondrial	115	DYGLDPkIANAIM
stp_pc	S	1	SGLGELILPENEPGSSIMPGK	1	P07954	Fumarate hydratase, mitochondrial	351	LGSGPRsGLGELI
stp_pc	Q	1	QATKDAGQISGLNVLR	2	P38646	Stress-70 protein, mitochondrial	203	FNDSQRqATKDAG
stp_pc	S	8	AAVPSGASTGIYEALELR	2	P06733	Alpha-enolase	40	AVPSGAsTGIYEA
stp_pc	K	22	AAVPSGASTGIYEALELRDNDKTR	1	P06733	Alpha-enolase	54	ELRDNDkTRYMGK
stp_pc	K	6	AGAVEKGVPLYR	1	P06733	Alpha-enolase	126	KAGAVEkGVPLYR
stp_pc	K	7	AVEHINKTIAPALVSK	4	P06733	Alpha-enolase	71	AVEHINkTIAPAL
stp_pc	K	20	FTASAGIQVVGDDLTVTNPKR	5	P06733	Alpha-enolase	326	LTVTNPkRIAKAV
stp_pc	K	13	GNPTVEVDLFTSKGLFR	1	P06733	Alpha-enolase	28	VDLFTSkGLFRAA
stp_pc	K	4	GVSKAVEHINK	12	P06733	Alpha-enolase	64	MGKGVSkAVEHIN
stp_pc	K	1	KLNVTEQEK	3	P06733	Alpha-enolase	81	PALVSKkLNVTEQ
stp_pc	K	3	LAKYNQLLR	1	P06733	Alpha-enolase	406	RSERLAkYNQLLR
stp_pc	K	10	IEEELGSKAK	6	P06733	Alpha-enolase	422	ELGSKAkFAGRNF
stp_pc	K	5	MSILKIHAR	11	P06733	Alpha-enolase	5	MSILkIHAREI
stp_pc	K	3	SGKYDLDFK	7	P06733	Alpha-enolase	256	EFFRSGkYDLDFK
stp_pc	K	5	TAIGKAGYTDK	2	P06733	Alpha-enolase	233	LKTAIGkAGYTDK
stp_pc	C	13	AAVEEGIVLGGGCALLR	1	P10809	60 kDa heat shock protein, mitochondrial	442	IVLGGGcALLRCI
stp_pc	K	21	ALMLQGVDLLADAVAVTMGPKGR	1	P10809	60 kDa heat shock protein, mitochondrial	58	AVTMGPkGRTVII
stp_pc	K	7	DGVTVAKSIDLKDK	1	P10809	60 kDa heat shock protein, mitochondrial	82	DGVTVAkSIDLKD
stp_pc	K	3	LAKLSDGVAVLK	3	P10809	60 kDa heat shock protein, mitochondrial	396	LNERLAkLSDGVA
stp_pc	K	7	IGIEIIKR	1	P10809	60 kDa heat shock protein, mitochondrial	469	IGIEIIkRTLKIP
stp_pc	K	8	IPAMTIAKNAGVEGSLIVEK	2	P10809	60 kDa heat shock protein, mitochondrial	481	PAMTIAkNAGVEG
stp_pc	K	3	ISKGANPVEIR	1	P10809	60 kDa heat shock protein, mitochondrial	133	GFEKISkGANPVE
stp_pc	K	5	NIGAKLVQDVANNTNEEAGDGTTTATVLAR	2	P10809	60 kDa heat shock protein, mitochondrial	96	YKNIGAkLVQDVA
stp_pc	S	1	SIAKEGFEK	1	P10809	60 kDa heat shock protein, mitochondrial	122	ATVLARsIAKEGF
stp_pc	K	3	TLKIPAMTIAK	9	P10809	60 kDa heat shock protein, mitochondrial	473	IIKRTLkIPAMTI
stp_pc	T	1	TVIIEQSWGSPK	1	P10809	60 kDa heat shock protein, mitochondrial	61	MGPKGRtVIIEQS
stp_pc	K	12	TVIIEQSWGSPKVTK	3	P10809	60 kDa heat shock protein, mitochondrial	72	QSWGSPkVTKDGV
stp_pc	K	8	VGEVIVTKDDAMLLK	1	P10809	60 kDa heat shock protein, mitochondrial	352	GEVIVTkDDAMLL
stp_pc	K	3	VTKDGVTVAK	7	P10809	60 kDa heat shock protein, mitochondrial	75	GSPKVTkDGVTVA
stp_pc	K	16	AGQPLQLLDASWYLPKLGR	1	P25325	3-mercaptopyruvate sulfurtransferase	40	ASWYLPkLGRDAR
stp_pc	D	6	MAAGGDHGSPDSYRSPLASR	1	P30566	Adenylosuccinate lyase	6	MAAGGdHGSPDS
stp_pc	Y	5	GEEIYSMDEGIR	2	Q96P70	Importin-9	889	VKGEEIySMDEGI
stp_pc	K	13	MATSSEEVLLIVKK	2	P32780	General transcription factor IIH subunit 1	13	EVLLIVkKVRQKK
stp_pc	K	1	KLYDIDVAK	9	P62750	60S ribosomal protein L23a	115	IKQAVKkLYDIDV
stp_pc	K	13	LAPDYDALDVANKIGII	2	P62750	60S ribosomal protein L23a	152	ALDVANkIGII
stp_pc	K	12	VNTLIRPDGEKK	1	P62750	60S ribosomal protein L23a	135	RPDGEKkAYVRLA
stp_pc	K	13	STPAITLESPDIKYPLR	1	P00387	NADH-cytochrome b5 reductase 3	42	LESPDIkYPLRLI
stp_pc	K	2	VKEDPDGEHAR	1	P52272	Heterogeneous nuclear ribonucleoprotein M	145	GRPLKVkEDPDGE
stp_pc	K	13	VVNAVLTQIDQIKR	2	Q15645	Pachytene checkpoint protein 2 homolog	288	TQIDQIkRHSNVV
stp_pc	K	15	VAPSAVLGPNVSIGKGVTVGEGVR	2	Q96IJ6	Mannose-1-phosphate guanyltransferase alpha	309	PNVSIGkGVTVGE
stp_pc	S	2	LSKEEIER	1	P34931	Heat shock 70 kDa protein 1-like	513	NDKGRLsKEEIER
stp_pc	K	15	NQVAMNPQNTVFDAKR	3	P34931	Heat shock 70 kDa protein 1-like	73	NTVFDAkRLIGRK
stp_pc	K	10	RTGEVVAIKK	1	Q8TD08	Mitogen-activated protein kinase 15	43	EVVAIKkIFDAFR
stp_pc	E	1	EAAKALDKR	1	P25398	40S ribosomal protein S12	37	LARGIReAAKALD
stp_pc	K	23	MAEEGIAAGGVMDVNTALQEVLKTALIHDGLAR	1	P25398	40S ribosomal protein S12	23	ALQEVLkTALIHD
stp_pc	S	12	SQNIVTDSSSLSAEAIR	2	Q01082	Spectrin beta chain, non-erythrocytic 1	1559	TDSSSLsAEAIRQ
stp_pc	K	25	AHDGGIYAISWSPDSTHLLSASGDKTSK	3	O75083	WD repeat-containing protein 1	256	LSASGDkTSKIWD
stp_pc	K	16	YAPSGFYIASGDVSGKLR	3	O75083	WD repeat-containing protein 1	81	SGDVSGkLRIWDT
stp_pc	K	2	LKLSEELSGGR	1	P61158	Actin-related protein 3	348	TVDARLkLSEELS
stp_pc	K	6	MHLAGKTEQAK	1	Q13442	28 kDa heat- and acid-stable phosphoprotein	132	KMHLAGkTEQAKA
stp_pc	K	4	ANVKIFK	1	P40925	Malate dehydrogenase, cytoplasmic	107	LLKANVkIFKSQG
stp_pc	K	1	KAEAQIAAK	1	P00505	Aspartate aminotransferase, mitochondrial	82	VLPSVRkAEAQIA
stp_pc	K	7	AVDLIQKHK	6	P39748	Flap endonuclease 1	252	AVDLIQkHKSIEE
stp_pc	K	8	HLTASEAKK	1	P39748	Flap endonuclease 1	200	LTASEAkKLPIQE
stp_pc	K	6	LDDFFKVTGSLSSAK	2	P39748	Flap endonuclease 1	345	RLDDFFkVTGSLS
stp_pc	S	1	SIEEIVR	7	P39748	Flap endonuclease 1	255	LIQKHKsIEEIVR
stp_pc	K	11	IEVEKPFAIAKE	9	P23284	Peptidyl-prolyl cis-trans isomerase B	215	KPFAIAkE
stp_pc	K	13	TVDNFVALATGEKGFGYK	1	P23284	Peptidyl-prolyl cis-trans isomerase B	84	ALATGEkGFGYKN
stp_pc	S	11	MGEAGAGAGASGGPEASPEAEVVK	1	Q9BTY7	Protein HGH1 homolog	11	GAGAGAsGGPEAS
stp_pc	K	5	AGEIKGFTGIDSDYEKPETPER	1	O95340	Bifunctional 3'-phosphoadenosine 5'-phosphosulfate synthase 2	173	ARAGEIkGFTGID
stp_pc	K	9	MATDELATKLSR	1	Q96C19	EF-hand domain-containing protein D2	9	TDELATkLSRRLQ
stp_pc	K	10	EGQEDQGLTKDFSNSPLHR	1	O95758	Polypyrimidine tract-binding protein 3	449	EDQGLTkDFSNSP
stp_pc	K	5	VSFSKSTI	3	O95758	Polypyrimidine tract-binding protein 3	549	LRVSFSkSTI
stp_pc	Y	6	AGGANYDAQTE	1	Q14019	Coactosin-like protein	137	KAGGANyDAQTE
stp_pc	K	5	TGTDKTLVK	1	Q14019	Coactosin-like protein	98	AKTGTDkTLVKEV
stp_pc	T	6	TGTDKTLVKEVVQNFAK	3	Q14019	Coactosin-like protein	99	KTGTDKtLVKEVV
stp_pc	K	1	KLAVNMVPFPR	12	P07437	Tubulin beta chain	252	LNADLRkLAVNMV
stp_pc	K	12	ISVYYNEATGGKYVPR	4	P07437	Tubulin beta chain	58	NEATGGkYVPRAI
stp_pc	K	4	EMIKSGMNVAR	1	P14618	Pyruvate kinase PKM	66	TLKEMIkSGMNVA
stp_pc	K	5	GATLKITLDNAYMEK	1	P14618	Pyruvate kinase PKM	141	KKGATLkITLDNA
stp_pc	K	10	GSGTAEVELKK	2	P14618	Pyruvate kinase PKM	135	TAEVELkKGATLK
stp_pc	K	1	KASDVHEVR	1	P14618	Pyruvate kinase PKM	247	FASFIRkASDVHE
stp_pc	Q	14	IYVDDGLISLQVKQK	2	P14618	Pyruvate kinase PKM	187	ISLQVKqKGADFL
stp_pc	K	6	SVETLKEMIK	9	P14618	Pyruvate kinase PKM	62	RSVETLkEMIKSG
stp_pc	K	15	MAATASAGAGGIDGKPR	2	Q02978	Mitochondrial 2-oxoglutarate/malate carrier protein	15	AGGIDGkPRTSPK
stp_pc	D	3	MADKEAAFDDAVEER	1	Q09028	Histone-binding protein RBBP4	3	MAdKEAAFD
stp_pc	K	6	DVFEAKAR	2	P12268	Inosine-5'-monophosphate dehydrogenase 2	134	RDVFEAkARHGFC
stp_pc	K	2	GKLPIVNEDDELVAIIAR	2	P12268	Inosine-5'-monophosphate dehydrogenase 2	208	QRSKKGkLPIVNE
stp_pc	K	2	VKQELLEEVKK	3	P50552	Vasodilator-stimulated phosphoprotein	348	SDLQRVkQELLEE
stp_pc	K	9	VTTVTEIGKDVIGLR	1	P53621	Coatomer subunit alpha	1211	TVTEIGkDVIGLR
stp_pc	T	9	AVFVDLEPTVIDEVR	3	Q9BQE3	Tubulin alpha-1C chain	73	FVDLEPtVIDEVR
stp_pc	K	10	DVNAAIATIKTK	7	Q9BQE3	Tubulin alpha-1C chain	336	AAIATIkTKRTIQ
stp_pc	Y	27	EDMAALEKDYEEVGADSADGEDEGEEY	2	Q9BQE3	Tubulin alpha-1C chain	449	EDEGEEy
stp_pc	K	6	GDVVPKDVNAAIATIK	9	Q9BQE3	Tubulin alpha-1C chain	326	RGDVVPkDVNAAI
stp_pc	K	4	LDHKFDLMYAK	10	Q9BQE3	Tubulin alpha-1C chain	394	WARLDHkFDLMYA
stp_pc	D	2	LDHKFDLMYAK	7	Q9BQE3	Tubulin alpha-1C chain	392	EAWARLdHKFDLM
stp_pc	K	7	LSVDYGKK	2	Q9BQE3	Tubulin alpha-1C chain	163	LSVDYGkKSKLEF
stp_pc	K	20	TIGGGDDSFNTFFSETGAGKHVPR	7	Q9BQE3	Tubulin alpha-1C chain	60	SETGAGkHVPRAV
stp_pc	T	9	VGINYQPPTVVPGGDLAK	1	Q9BQE3	Tubulin alpha-1C chain	361	INYQPPtVVPGGD
stp_pc	K	18	VGINYQPPTVVPGGDLAKVQR	2	Q9BQE3	Tubulin alpha-1C chain	370	PGGDLAkVQRAVC
stp_pc	Y	4	MATYSLANER	1	Q9P086	Mediator of RNA polymerase II transcription subunit 11	4	MATySLANER
stp_pc	K	4	GPIKFNVWDTAGQEK	5	P62826	GTP-binding nuclear protein Ran	60	TNRGPIkFNVWDT
stp_pc	K	1	KNLQYYDISAK	2	P62826	GTP-binding nuclear protein Ran	142	IVFHRKkNLQYYD
stp_pc	K	12	MAAQGEPQVQFKLVLVGDGGTGK	2	P62826	GTP-binding nuclear protein Ran	12	EPQVQFkLVLVGD
stp_pc	K	1	KVQENSIQR	1	Q6P1Q9	tRNA N(3)-methylcytidine methyltransferase METTL2B	53	AAAAERkVQENSI
stp_pc	D	12	AVLVDLEPGTMDSVR	1	P68371	Tubulin beta-4B chain	74	LEPGTMdSVRSGP
stp_pc	K	1	KLAVNMVPFPR	12	P68371	Tubulin beta-4B chain	252	LNADLRkLAVNMV
stp_pc	K	12	INVYYNEATGGKYVPR	5	P68371	Tubulin beta-4B chain	58	NEATGGkYVPRAV
stp_pc	S	22	DQAVENILVSPVVVASSLGLVSLGGK	1	P50454	Serpin H1	82	SSLGLVsLGGKAT
stp_pc	K	26	DQAVENILVSPVVVASSLGLVSLGGKATTASQAK	2	P50454	Serpin H1	86	LVSLGGkATTASQ
stp_pc	K	4	LSPKAATLAER	2	P50454	Serpin H1	39	AEKLSPkAATLAE
stp_pc	K	5	VIGVKSEGEIAR	5	P50395	Rab GDP dissociation inhibitor beta	269	GKVIGVkSEGEIA
stp_pc	E	4	MPLENLEEEGLPKNPDLR	23	Q15008	26S proteasome non-ATPase regulatory subunit 6	4	MPLeNLEEEG
stp_pc	K	25	AVSDASAGDYGSAIETLVTAISLIKQSK	1	Q16630	Cleavage and polyadenylation specificity factor subunit 6	456	TAISLIkQSKVSA
stp_pc	K	23	IVSRPEELREDDVGTGAGLLEIKK	5	P49368	T-complex protein 1 subunit gamma	353	AGLLEIkKIGDEY
stp_pc	K	7	MAMQAAKR	1	Q9Y3B4	Splicing factor 3B subunit 6	7	MAMQAAkRANIRL
stp_pc	Y	15	DLYANTVLSGGTTMYPGIADR	2	P63261	Actin, cytoplasmic 2	306	SGGTTMyPGIADR
stp_pc	Y	3	DSYVGDEAQSK	8	P63261	Actin, cytoplasmic 2	53	MGQKDSyVGDEAQ
stp_pc	K	11	DSYVGDEAQSKR	2	P63261	Actin, cytoplasmic 2	61	GDEAQSkRGILTL
stp_pc	K	11	EITALAPSTMKIK	10	P63261	Actin, cytoplasmic 2	326	LAPSTMkIKIIAP
stp_pc	Y	2	GYSFTTTAER	2	P63261	Actin, cytoplasmic 2	198	ILTERGySFTTTA
stp_pc	K	11	HQGVMVGMGQKDSYVGDEAQSK	5	P63261	Actin, cytoplasmic 2	50	MVGMGQkDSYVGD
stp_pc	D	2	KDLYANTVLSGGTTMYPGIADR	7	P63261	Actin, cytoplasmic 2	292	DVDIRKdLYANTV
stp_pc	K	2	IKIIAPPER	8	P63261	Actin, cytoplasmic 2	328	PSTMKIkIIAPPE
stp_pc	K	18	MEEEIAALVIDNGSGMCKAGFAGDDAPR	1	P63261	Actin, cytoplasmic 2	18	NGSGMCkAGFAGD
stp_pc	K	3	MQKEITALAPSTMK	3	P63261	Actin, cytoplasmic 2	315	IADRMQkEITALA
stp_pc	K	18	VAPEEHPVLLTEAPLNPKANR	21	P63261	Actin, cytoplasmic 2	113	EAPLNPkANREKM
stp_pc	K	9	SGVGNIFIKNLDK	2	P11940	Polyadenylate-binding protein 1	104	VGNIFIkNLDKSI
stp_pc	K	7	METSALKQQEQPAATK	1	P40937	Replication factor C subunit 5	7	METSALkQQEQPA
stp_pc	K	4	VIEKFTENTR	1	P40937	Replication factor C subunit 5	144	LRRVIEkFTENTR
stp_pc	K	4	HALKGAGTNEK	1	P08758	Annexin A5	101	ELKHALkGAGTNE
stp_pc	Y	5	LYDAYELK	3	P08758	Annexin A5	94	SRLYDAyELKHAL
stp_pc	K	6	LAQQIKQEVR	2	P13995	Bifunctional methylenetetrahydrofolate dehydrogenase/cyclohydrolase, mitochondrial	50	KLAQQIkQEVRQE
stp_pc	K	4	TVSKVDDFLANEAK	3	P52209	6-phosphogluconate dehydrogenase, decarboxylating	38	FNRTVSkVDDFLA
stp_pc	K	10	AEAESMYQIKYEELQSLAGK	1	P05787	Keratin, type II cytoskeletal 8	285	ESMYQIkYEELQS
stp_pc	K	7	FASFIDKVR	3	P05787	Keratin, type II cytoskeletal 8	108	FASFIDkVRFLEQ
stp_pc	K	1	KLLEGEESR	6	P05787	Keratin, type II cytoskeletal 8	393	EIATYRkLLEGEE
stp_pc	K	5	MLETKWSLLQQQK	4	P05787	Keratin, type II cytoskeletal 8	122	NKMLETkWSLLQQ
stp_pc	K	7	LNHSVAKETAR	1	O95295	SNARE-associated protein Snapin	115	LNHSVAkETARRR
stp_pc	K	13	FNADEFEDMVAEKR	5	P27635	60S ribosomal protein L10	188	EDMVAEkRLIPDG
stp_pc	D	1	DKGFGFIR	3	Q15233	Non-POU domain-containing octamer-binding protein	108	EVFIHKdKGFGFI
stp_pc	K	8	GIVEFSGKPAAR	6	Q15233	Non-POU domain-containing octamer-binding protein	198	IVEFSGkPAARKA
stp_pc	K	4	IAAKFITHAPPGEFNEVFNDVR	3	P52907	F-actin-capping protein subunit alpha-1	19	KVRIAAkFITHAP
stp_pc	S	2	MSESELGR	1	Q5TGZ0	MICOS complex subunit MIC10	2	MsESELGR
stp_pc	K	8	MAAQSAPKVVLK	1	Q9Y3Y2	Chromatin target of PRMT1 protein	8	AAQSAPkVVLKST
stp_pc	Q	4	MGVQVETISPGDGR	8	P62942	Peptidyl-prolyl cis-trans isomerase FKBP1A	4	MGVqVETISP
stp_pc	K	5	MSFLKSFPPPGPAEGLLR	1	P54105	Methylosome subunit pICln	5	MSFLkSFPPPG
stp_pc	S	1	STQAATQVVLNVPETR	5	O75439	Mitochondrial-processing peptidase subunit beta	44	GENRLRsTQAATQ
stp_pc	K	1	KPGDLSDELR	1	Q13435	Splicing factor 3B subunit 2	605	TRLKEKkPGDLSD
stp_pc	D	3	AKDANNGNLQLR	1	P05455	Lupus La protein	288	ALGKAKdANNGNL
stp_pc	K	22	DNYVPEVSALDQEIIEVDPDTKEMLK	1	P08708	40S ribosomal protein S17	103	EVDPDTkEMLKLL
stp_pc	K	22	LLDFGSLSNLQVTQPTVGMNFKTPR	2	P08708	40S ribosomal protein S17	129	TVGMNFkTPRGPV
stp_pc	E	4	VIIEKYYTR	1	P08708	40S ribosomal protein S17	18	AARVIIeKYYTRL
stp_pc	K	20	ISDSVLVDIKDTEPLIQTAKTTLGSK	1	P48643	T-complex protein 1 subunit epsilon	170	PLIQTAkTTLGSK
stp_pc	K	6	NELNAKVR	4	P62195	26S proteasome regulatory subunit 8	55	RNELNAkVRLLRE
stp_pc	K	9	VSGSELVQKFIGEGAR	2	P62195	26S proteasome regulatory subunit 8	222	GSELVQkFIGEGA
stp_pc	K	1	KLENEVEQR	7	P12270	Nucleoprotein TPR	854	ISHLKKkLENEVE
stp_pc	K	3	LLKEAGEANK	1	P12270	Nucleoprotein TPR	315	ELHKLLkEAGEAN
stp_pc	K	10	ISTQLDFASKR	1	P12270	Nucleoprotein TPR	723	QLDFASkRYEMLQ
stp_pc	K	3	AVKDATNTGIK	2	P50579	Methionine aminopeptidase 2	281	TLLKAVkDATNTG
stp_pc	D	19	MAGVEEVAASGSHLNGDLDPDDREEGAASTAEEAAK	1	P50579	Methionine aminopeptidase 2	19	HLNGDLdPDDREE
stp_pc	H	4	MPAHLLQDDISSSYTTTTTITAPPSR	5	O00767	Stearoyl-CoA desaturase	4	MPAhLLQDDI
stp_pc	K	8	LLDTSTYKEAFR	21	Q15126	Phosphomevalonate kinase	69	LDTSTYkEAFRKD
stp_pc	K	6	LSGPLKEQYAQEHGLNFQR	1	Q15126	Phosphomevalonate kinase	48	RLSGPLkEQYAQE
stp_pc	K	5	MLLLKGFGK	12	Q9NVS9	Pyridoxine-5'-phosphate oxidase	100	ARMLLLkGFGKDG
stp_pc	K	6	AAIVEKLSSLPFQK	2	P61970	Nuclear transport factor 2	55	KAAIVEkLSSLPF
stp_pc	S	8	AEISELPSIVQDLANGNITWADVEAR	1	P41250	Glycine--tRNA ligase	704	EISELPsIVQDLA
stp_pc	K	5	VLEAKELALQPKDDIVDR	4	P41250	Glycine--tRNA ligase	108	KRVLEAkELALQP
stp_pc	K	12	VADISGDTQKAK	1	Q7KZF4	Staphylococcal nuclease domain-containing protein 1	515	GDTQKAkQFLPFL
stp_pc	K	2	LKEVLEYNAIGGK	1	P14324	Farnesyl pyrophosphate synthase	112	DAIARLkEVLEYN
stp_pc	Y	2	KYEPPVPTR	1	P62191	26S proteasome regulatory subunit 4	25	KDKKKKyEPPVPT
stp_pc	K	8	VVLTQANKLGV	1	O94979	Protein transport protein Sec31A	1217	VLTQANkLGV
stp_pc	K	3	IGKPAPDFK	5	P32119	Peroxiredoxin-2	10	GNARIGkPAPDFK
stp_pc	K	9	LSEDYGVLKTDEGIAYR	1	P32119	Peroxiredoxin-2	119	EDYGVLkTDEGIA
stp_pc	K	2	EKVESELR	2	P27348	14-3-3 protein theta	85	IKDYREkVESELR
stp_pc	K	9	MEKTELIQKAK	12	P27348	14-3-3 protein theta	9	KTELIQkAKLAEQ
stp_pc	K	5	VFYLKMK	6	P27348	14-3-3 protein theta	120	SKVFYLkMKGDYF
stp_pc	K	11	IGQGTFGEVFKAR	4	P50750	Cyclin-dependent kinase 9	35	TFGEVFkARHRKT
stp_pc	Y	1	YIFDNVAK	2	Q15293	Reticulocalbin-1	115	KRVQKRyIFDNVA
stp_pc	K	1	KAFANPEDALR	21	O14684	Prostaglandin E synthase	42	QVRLRKkAFANPE
stp_pc	S	1	SDPDVER	3	O14684	Prostaglandin E synthase	61	GPQYCRsDPDVER
stp_pc	C	5	RLDGCVYAIKR	2	P0C1S8	Wee1-like protein kinase 2	236	IKRLDGcVYAIKR
stp_pc	K	10	RLDGCVYAIKR	2	P0C1S8	Wee1-like protein kinase 2	241	GCVYAIkRSMKTF
stp_pc	K	6	IFYDMKVR	26	P60981	Destrin	19	RIFYDMkVRKCST
stp_pc	C	12	MASGVQVADEVCR	4	P60981	Destrin	12	QVADEVcRIFYDM
stp_pc	E	1	EIKSQQSEVTR	1	Q9H299	SH3 domain-binding glutamic acid-rich-like protein 3	16	SVTGSReIKSQQS
stp_pc	K	8	VLNSAKEK	1	P35610	Sterol O-acyltransferase 1	285	LNSAKEkSSTVPI
stp_pc	K	8	NLLSVAYKNVIGAR	5	P62258	14-3-3 protein epsilon	50	LLSVAYkNVIGAR
stp_pc	K	5	VFYYKMK	1	P62258	14-3-3 protein epsilon	123	SKVFYYkMKGDYH
stp_pc	K	1	KLYGDADYLEER	2	P17812	CTP synthase 1	466	KNSVMRkLYGDAD
stp_pc	K	9	LSPEDYTLKVSQAGK	1	P07339	Cathepsin D	357	PEDYTLkVSQAGK
stp_pc	T	5	MPLLTQQIQDEDDQYSLVASLDNVR	2	O60671	Cell cycle checkpoint protein RAD1	5	MPLLtQQIQDE
stp_pc	E	3	KVEQLQQEYTEMK	3	Q14258	E3 ubiquitin/ISG15 ligase TRIM25	239	TANRKVeQLQQEY
stp_pc	K	10	DLSDGIHVVKDAR	2	Q07065	Cytoskeleton-associated protein 4	223	DGIHVVkDARERD
stp_pc	K	1	KLFIGGLSFETTDESLR	2	P09651	Heterogeneous nuclear ribonucleoprotein A1	15	EPEQLRkLFIGGL
stp_pc	K	3	MSKSESPKEPEQLR	3	P09651	Heterogeneous nuclear ribonucleoprotein A1	3	MSkSESPKE
stp_pc	S	12	NQGGYGGSSSSSSYGSGR	1	P09651	Heterogeneous nuclear ribonucleoprotein A1	364	GGSSSSsSYGSGR
stp_pc	S	1	SSGPYGGGGQYFAKPR	5	P09651	Heterogeneous nuclear ribonucleoprotein A1	337	GNFGGRsSGPYGG
stp_pc	K	17	MTAAATATVLKEGVLEKR	4	Q9Y5J5	Pleckstrin homology-like domain family A member 3	17	KEGVLEkRSGGLL
stp_pc	K	1	KAFLDNGPK	1	P78344	Eukaryotic translation initiation factor 4 gamma 2	313	HHWVPRkAFLDNG
stp_pc	Y	10	SSGVPVDGFYTEEVR	5	Q9BSD7	Cancer-related nucleoside-triphosphatase	37	VPVDGFyTEEVRQ
stp_pc	K	6	TTLIHKASEVLK	2	Q9BSD7	Cancer-related nucleoside-triphosphatase	21	KTTLIHkASEVLK
stp_pc	K	9	VGLEPPPGKR	1	Q9BSD7	Cancer-related nucleoside-triphosphatase	73	LEPPPGkRECRVG
stp_pc	K	6	MASLLKVDQEVK	4	P61289	Proteasome activator complex subunit 3	6	MASLLkVDQEVK
stp_pc	K	12	MASLLKVDQEVKLK	2	P61289	Proteasome activator complex subunit 3	12	KVDQEVkLKVDSF
stp_pc	S	1	SNQQLVDIIEK	2	P61289	Proteasome activator complex subunit 3	111	PNGMLKsNQQLVD
stp_pc	Y	8	SSNAETLY	1	P61289	Proteasome activator complex subunit 3	254	SNAETLy
stp_pc	K	2	GKEDALVTK	1	P22087	rRNA 2'-O-methyltransferase fibrillarin	102	VFICRGkEDALVT
stp_pc	K	14	DDGLFSGDPNWFPKK	1	P37802	Transgelin-2	153	DPNWFPkKSKENP
stp_pc	K	11	NFSDNQLQEGKNVIGLQMGTNR	2	P37802	Transgelin-2	171	NQLQEGkNVIGLQ
stp_pc	S	3	MPSKGPLQSVQVFGR	5	P62249	40S ribosomal protein S16	3	MPsKGPLQS
stp_pc	S	3	MLSLDFLDDVR	5	P67812	Signal peptidase complex catalytic subunit SEC11A	3	MLsLDFLDD
stp_pc	S	1	SLFSSIGEVESAK	3	Q15717	ELAV-like protein 1	38	TQDELRsLFSSIG
stp_pc	K	13	LGEDIVITAHVLKQGK	5	Q9NPJ3	Acyl-coenzyme A thioesterase 13	108	ITAHVLkQGKTLA
stp_pc	K	5	AELVKLQQTYAALNSK	1	P46940	Ras GTPase-activating-like protein IQGAP1	1505	RKAELVkLQQTYA
stp_pc	K	15	SNQQLENDLNLMDIKIGLLVK	2	P46940	Ras GTPase-activating-like protein IQGAP1	916	LNLMDIkIGLLVK
stp_pc	S	6	MGGLASGGDVEPGLPVEVR	1	P51116	RNA-binding protein FXR2	6	MGGLAsGGDVEP
stp_pc	K	8	VIQEIVDKSGVVR	1	P51116	RNA-binding protein FXR2	320	IQEIVDkSGVVRV
stp_pc	K	4	SLTKDLGGNAK	1	P50213	Isocitrate dehydrogenase [NAD] subunit alpha, mitochondrial	343	DGKSLTkDLGGNA
stp_pc	K	7	NAPVELKIR	2	Q16401	26S proteasome non-ATPase regulatory subunit 5	358	NAPVELkIRCLDA
stp_pc	K	8	MATIPDWKLQLLAR	1	Q6NYC8	Phostensin	8	ATIPDWkLQLLAR
stp_pc	N	1	NKTGAAPIIDVVR	1	P46776	60S ribosomal protein L27a	93	RVNAAKnKTGAAP
stp_pc	K	5	SGYYKVLGK	1	P46776	60S ribosomal protein L27a	110	VRSGYYkVLGKGK
stp_pc	D	8	MADFDTYDDRAYSSFGGGR	2	Q15056	Eukaryotic translation initiation factor 4H	8	ADFDTYdDRAYSS
stp_pc	K	8	FGALTAEKLR	3	O95372	Acyl-protein thioesterase 2	190	GALTAEkLRSVVT
stp_pc	K	4	LDHKFDLMYAK	10	P68366	Tubulin alpha-4A chain	394	WARLDHkFDLMYA
stp_pc	D	2	LDHKFDLMYAK	7	P68366	Tubulin alpha-4A chain	392	EAWARLdHKFDLM
stp_pc	K	7	LSVDYGKK	2	P68366	Tubulin alpha-4A chain	163	LSVDYGkKSKLEF
stp_pc	T	9	VGINYQPPTVVPGGDLAK	1	P68366	Tubulin alpha-4A chain	361	INYQPPtVVPGGD
stp_pc	K	18	VGINYQPPTVVPGGDLAKVQR	2	P68366	Tubulin alpha-4A chain	370	PGGDLAkVQRAVC
stp_pc	Y	1	YSTSGSSGLTTGK	1	Q16891	MICOS complex subunit MIC60	33	LRPCRRySTSGSS
stp_pc	K	1	KFGVLSDNFK	4	Q06203	Amidophosphoribosyltransferase	372	QLGVAKkFGVLSD
stp_pc	K	1	KIHSQEEALR	1	O00764	Pyridoxal kinase	161	ELLSGRkIHSQEE
stp_pc	K	7	MAGTALKR	2	P60604	Ubiquitin-conjugating enzyme E2 G2	7	MAGTALkRLMAEY
stp_pc	K	11	VGAGTYGDVYKAR	1	Q12851	Mitogen-activated protein kinase kinase kinase kinase 2	32	TYGDVYkARDTVT
stp_pc	S	5	MATSSMSK	1	Q9UBD5	Origin recognition complex subunit 3	5	MATSsMSKGCF
stp_pc	K	8	LLTVPFEKHSTL	2	O95336	6-phosphogluconolactonase	254	LTVPFEkHSTL
stp_pc	K	10	IVAPISDSPKPPPQR	12	O95336	6-phosphogluconolactonase	180	PISDSPkPPPQRV
stp_pc	K	9	MAVSESQLKK	1	Q99816	Tumor susceptibility gene 101 protein	9	VSESQLkKMVSKY
stp_pc	K	8	GASDEEIKR	1	P25685	DnaJ homolog subfamily B member 1	21	ASDEEIkRAYRRQ
stp_pc	K	13	LQAANAEDIKSGK	2	Q02818	Nucleobindin-1	84	EDIKSGkLSRELD

## Sheet: Table S7-reactive lysines
Reactive lysines labeled by KP2 in MCF-7 cell lysates. LFQ means label free quantification
sequence	Modification and positions	Positions in Master Proteins	LFQ Ratio10:10 (average)	LFQ Ratio100:10 (average)	PSMs	Theo. MH+ [Da]
[K].AAAAAAALQAKSDEK.[A]	1xKpyri_pc [K11]	P36578 [354-368]	0.418	1.491	16	1673.86
[K].LLSKTPELNLDQFHDK.[T]	1xKpyri_pc [K4]	P27824 [167-182]	1.334	1.731	9	2156.11
[R].LLTWDVKDTLLR.[L]	1xKpyri_pc [K7]	Q9BSH5 [9-20]	0.65	1.313	9	1730.96
[R].IIVEKPFGR.[D]	1xKpyri_pc [K5]	P11413 [167-175]	0.955	0.213	190	1316.75
[R].IMLKNVEDFTGPR.[E]	1xKpyri_pc [K4]	P61009 [46-58]	1.132	0.377	19	1777.91
[R].IMLKNVEDFTGPR.[E]	1xOxidation [M2]; 1xKpyri_pc [K4]	P61009 [46-58]	0.631	5.265	13	1793.9
[R].INEILSNALKR.[G]	1xKpyri_pc [K10]	P52272 [372-382]	1.196	2.461	13	1528.86
[R].INFDKYHPGYFGK.[V]	1xKpyri_pc [K5]	P46776 [43-55]	1.448	8.66	34	1843.89
[R].LNKCGVISPR.[F]	1xCarbamidomethyl [C4]; 1xKpyri_pc [K3]	P62244 [69-78]	0.929	1.08	31	1401.74
[R].INKMLSCAGADR.[L]	1xCarbamidomethyl [C7]; 1xKpyri_pc [K3]	P27635 [99-110]	0.919	0.476	29	1593.76
[R].LNLYELKEGR.[Q]	1xKpyri_pc [K7]	P49720 [71-80]	1.591	4.823	9	1492.79
[R].IINEPTAAAIAYGLDKK.[GV]	1xKpyri_pc [K]	P11142 [172-188]	0.981	0.893	13	2046.1
[R].INVYYNEATGGKYVPR.[A]	1xKpyri_pc [K12]	P68371 [47-62]	1.042	20.187	30	2102.05
[R].LQAEIEGLKGQR.[A]	1xKpyri_pc [K9]	P05787 [317-328]	0.681	19.85	91	1599.86
[K].IQAKLPGIAK.[K]	1xKpyri_pc [K4]	O95197 [1019-1028]	1.061	5.311	5	1296.78
[K].LQDKATVLTTER.[K]	1xKpyri_pc [K4]	Q9UMS4 [176-187]	1.131	1.447	27	1632.87
[R].IQEAGTEVVKAK.[A]	1xKpyri_pc [K]	P40926 [230-241]	1.065	1.201	16	1530.83
[R].LQLPVWEYKDR.[F]	1xKpyri_pc [K9]	O43143 [135-145]	0.98	1.278	16	1704.89
[K].LQNKEHVIEALR.[R]	1xKpyri_pc [K4]	P27635 [142-153]	1.106	6.422	62	1707.93
[R].LQTQVFKLGLAK.[S]	1xKpyri_pc [K7]	P46781 [110-121]	1.132	10.926	17	1603.93
[R].ISAQDAKQAGLVSK.[I]	1xKpyri_pc [K7]	P30084 [198-211]	1.083	1.67	35	1673.9
[R].LSEDYGVLKTDEGIAYR.[G]	1xKpyri_pc [K9]	P32119 [111-127]	1.025	4.413	55	2187.07
[K].ISKGANPVEIR.[R]	1xKpyri_pc [K3]	P10809 [131-141]	0.945	28.487	20	1441.79
[R].IPKEQGVLSFWR.[G]	1xKpyri_pc [K3]	P12236 [61-72]; P05141 [61-72]	0.941	0.938	19	1717.92
[R].LLLPGELAKHAVSEGTK.[A]	1xKpyri_pc [K9]	Q16778 [101-117]; Q5QNW6 [101-117]; P58876 [101-117]	1.054	5.861	99	2021.12
[R].LLLEFTDTSYEEKR.[Y]	1xKpyri_pc [K13]	P21266 [23-36]	0.712	0.802	14	2001.99
[K].LIKNNASTDYDLSDK.[S]	1xKpyri_pc [K3]	P39023 [298-312]	1.038	2.942	31	1954.95
[R].IGISKSELVAMLEEEELRK.[A]	1xKpyri_pc [K5]	P40616 [100-118]	1.035	0.458	3	2432.29
[R].LGNSADALESAKR.[A]	1xKpyri_pc [K12]	O96011 [61-73]	1.16	0.824	20	1589.8
[K].IGQGYLIKDGK.[L]	1xKpyri_pc [K8]	P39023 [287-297]	1.275	2.856	22	1449.78
[K].LKAEGSEIR.[L]	1xKpyri_pc [K2]	P07237 [70-78]	0.87	4.289	60	1260.67
[K].LKDPANFQYPAESVLAYK.[E]	1xKpyri_pc [K]	P15559 [60-77]	0.763	2.359	27	2312.17
[K].IKGEHPGLSIGDVAK.[K]	1xKpyri_pc [K2]	P09429 [113-127]	0.998	1.755	106	1778.95
[K].IKIIAPPER.[K]	1xKpyri_pc [K2]	P60709 [327-335]; P68133 [329-337]; Q562R1 [328-336]; P63261 [327-335]	0.988	15.807	174	1294.76
[K].IKIIAPPERK.[Y]	1xKpyri_pc [K2]	P60709 [327-336]; P68133 [329-338]; Q562R1 [328-337]; P63261 [327-336]	1.137	0.893	69	1422.86
[KR].IKIQLWDTAGQER.[FY]	1xKpyri_pc [K2]	P61026 [58-70]; P61106 [60-72]; P61006 [57-69]; O95716 [71-83]	0.96	5.548	81	1815.95
[K].IKLQVWDTAGQER.[F]	1xKpyri_pc [K2]	P51153 [57-69]	1.298	4.756	8	1801.93
[K].LKPQYLEELPGQLK.[Q]	1xKpyri_pc [K2]	P21266 [127-140]	1.072	2.909	43	1914.05
[K].IKSEHPGLSIGDTAK.[K]	1xKpyri_pc [K2]	P26583 [113-127]	0.914	1.757	19	1810.94
[K].IKSTNPGISIGDVAK.[K]	1xKpyri_pc [K2]	O15347 [111-125]	0.985	5.103	15	1757.95
[R].LKVGLQVVAVK.[A]	1xKpyri_pc [K2]	P10809 [291-301]	1.078	5.151	14	1411.88
[K].LKVPEWVDTVK.[L]	1xKpyri_pc [K2]	P39019 [28-38]	1.162	3.765	25	1571.86
[R].LKVPPAINQFTQALDR.[Q]	1xKpyri_pc [K2]	P62424 [74-89]	0.863	1.668	10	2069.13
[R].LKYALTGDEVK.[K]	1xKpyri_pc [K2]	P62701 [52-62]	1.002	9.035	33	1494.8
[R].LKYALTGDEVKK.[I]	1xKpyri_pc [K2]	P62701 [52-63]	1.189	2.762	23	1622.89
[R].LLAEPVPGIKAEPDESNAR.[Y]	1xKpyri_pc [K10]	P61088 [15-33]	0.609	6.776	11	2264.17
[R].LLEDGEDFNLGDALDSSNSMQTIQKTTTR.[R]	1xOxidation [M20]; 1xKpyri_pc [K25]	P05783 [383-411]	1.242	0.845	1	3473.61
[K].LLEPVLLLGKER.[F]	1xKpyri_pc [K10]	P62249 [51-62]	1.079	3.832	29	1637.97
[R].LIFAGKQLEDGR.[T]	1xKpyri_pc [K6]	P62987 [43-54]; P62979 [43-54]	1.041	20.032	14	1604.85
[K].ILKCAGNEDIITLR.[A]	1xCarbamidomethyl [C4]; 1xKpyri_pc [K3]	P12004 [78-91]	0.84	1.781	13	1874
[R].ISVYYNEATGGKYVPR.[A]	1xKpyri_pc [K12]	P07437 [47-62]	0.978	11.774	63	2075.03
[K].LTFDTTFSPNTGKK.[S]	1xKpyri_pc [K13]	P45880 [108-121]	1.026	1.811	12	1814.91
[K].LTGEVVALKK.[I]	1xKpyri_pc [K9]	P24941 [25-34]	1.107	0.846	5	1315.77
[K].ITITNDKGR.[L]	1xKpyri_pc [K7]	P11142 [501-509]; P0DMV9 [501-509]	0.864	6.832	10	1275.68
[-].MASNVTNKTDPR.[S]	1xMet-loss+Acetyl [N-Term]; 1xKpyri_pc [K8]	P07910 [1-12]	1.027	2.426	46	1502.73
[-].MASSDIQVKELEK.[R]	1xMet-loss+Acetyl [N-Term]; 1xKpyri_pc [K9]	P16949 [1-13]	1.073	3.668	7	1646.84
[-].MATAEVLNIGKK.[L]	1xMet-loss+Acetyl [N-Term]; 1xKpyri_pc [K11]	P22234 [1-12]	0.855	1.006	19	1443.8
[-].MAVSTGVKVPR.[N]	1xMet-loss+Acetyl [N-Term]; 1xKpyri_pc [K8]	Q15819 [1-11]	0.892	15.043	12	1313.73
[-].MDDDIAALVVDNGSGMCK.[A]	1xCarbamidomethyl [C17]; 1xMet-loss+Acetyl [N-Term]; 1xKpyri_pc [K18]	P60709 [1-18]	0.93	2.31	6	2079.91
[-].MDGIVPDIAVGTKR.[G]	1xAcetyl [N-Term]; 1xKpyri_pc [K13]	P26599 [1-14]	0.694	0.73	6	1771.92
[-].MDKNELVQKAK.[L]	1xAcetyl [N-Term]; 1xKpyri_pc [K]	P63104 [1-11]	1.102	2.509	34	1603.83
[-].MEALGKLK.[Q]	1xAcetyl [N-Term]; 1xKpyri_pc [K6]	Q9Y282 [1-8]	0.926	0.797	7	1189.64
[-].MEDYTKIEK.[I]	1xAcetyl [N-Term]; 1xKpyri_pc [K6]	P06493 [1-9]	1.134	1.375	12	1456.68
[-].MEKTELIQKAK.[L]	1xAcetyl [N-Term]; 1xKpyri_pc [K9]	P27348 [1-11]	0.868	0.457	2	1618.86
[-].MELVQVLKR.[G]	1xAcetyl [N-Term]; 1xKpyri_pc [K8]	Q9UI09 [1-9]	0.8	0.697	10	1415.78
[-].MEQVNELKEK.[G]	1xAcetyl [N-Term]; 1xKpyri_pc [K8]	P31948 [1-10]	1.343	2.198	7	1547.75
[-].MGKDYYQTLGLAR.[G]	1xMet-loss [N-Term]; 1xKpyri_pc [K3]	P25685 [1-13]	0.79	7.673	31	1642.83
[-].MKFNPFVTSDR.[S]	1xKpyri_pc [K2]	P61254 [1-11]; Q9UNX3 [1-11]	0.939	0.107	16	1599.77
[-].MKFNPFVTSDR.[S]	1xOxidation [M1]; 1xKpyri_pc [K2]	P61254 [1-11]; Q9UNX3 [1-11]	1.131	4.384	62	1615.77
[-].MKVELCSFSGYK.[I]	1xCarbamidomethyl [C6]; 1xOxidation [M1]; 1xKpyri_pc [K2]	P83731 [1-12]	0.961	0.749	10	1722.8
[K].MLETKWSLLQQQK.[T]	1xKpyri_pc [K5]	P05787 [118-130]	0.481	6.668	47	1890.99
[K].MLETKWSLLQQQK.[T]	1xOxidation [M1]; 1xKpyri_pc [K5]	P05787 [118-130]	1.084	24.359	47	1906.98
[K].MIYASSKDAIK.[K]	1xKpyri_pc [K7]	P23528 [115-125]; P60981 [115-125]	0.415	11.895	16	1484.76
[K].MIYASSKDAIK.[K]	1xOxidation [M1]; 1xKpyri_pc [K7]	P23528 [115-125]; P60981 [115-125]	0.99	16.536	2	1500.75
[-].MPDSWDKDVYPEPPR.[R]	1xMet-loss [N-Term]; 1xKpyri_pc [K7]	O96000 [1-15]	1.116	1.909	45	1958.9
[-].MPGIDKLPIEETLEDSPQTR.[S]	1xMet-loss [N-Term]; 1xKpyri_pc [K6]	Q9UKG1 [1-20]	0.963	0.523	9	2396.21
[-].MPGVTVKDVNQQEFVR.[A]	1xMet-loss [N-Term]; 1xKpyri_pc [K7]	P39019 [1-16]	0.914	0.2	65	1974.02
[-].MASNKTTLQK.[M]	1xMet-loss+Acetyl [N-Term]; 1xKpyri_pc [K5]	Q13185 [1-10]	1.047	7.511	11	1290.68
[K].LGINSLQELKQNIAK.[G]	1xKpyri_pc [K10]	P55327 [111-125]	2.19	3.777	11	1927.08
[-].MASLSLAPVNIFKAGADEERAETAR.[L]	1xMet-loss+Acetyl [N-Term]; 1xKpyri_pc [K13]	P78371 [1-25]	1.212	2.617	6	2816.43
[-].MASGVAVSDGVIKVFNDMK.[V]	1xMet-loss+Acetyl [N-Term]; 1xKpyri_pc [K13]	P23528 [1-19]	0.774	5.024	14	2137.07
[K].LTSDDVKEQIYK.[L]	1xKpyri_pc [K7]	P62277 [28-39]	1.008	4.357	36	1696.85
[R].IVDGKVVSETNDTK.[V]	1xKpyri_pc [K5]	P05783 [413-426]	0.904	15.395	44	1762.9
[K].LVLVGDGGTGKTTFVK.[R]	1xKpyri_pc [K11]	P62826 [13-28]	1.159	17.869	10	1850.02
[K].IVNLGSSKTDLFYER.[K]	1xKpyri_pc [K8]	Q7RTV0 [88-102]	1.924	30.013	3	2000.02
[K].IVNSAQTGSFKQLTVK.[E]	1xKpyri_pc [K11]	O75964 [56-71]	0.904	7.743	34	1979.07
[K].IVSGKDYNVTANSK.[L]	1xKpyri_pc [K5]	P00338 [77-90]	0.792	1.866	43	1753.89
[R].LVSLIGSKTQIPTQR.[Y]	1xKpyri_pc [K8]	P25786 [108-122]	0.9	6.321	38	1899.08
[R].LYELKAAVDGLSK.[M]	1xKpyri_pc [K5]	Q13155 [66-78]	0.934	0.935	20	1664.9
[K].IYHPNVDKLGR.[I]	1xKpyri_pc [K8]	P61088 [75-85]	1.161	78.124	17	1569.83
[R].LYKEELEQTYHAK.[L]	1xKpyri_pc [K3]	P20700 [259-271]	1.109	0.851	4	1909.94
[K].IYKIGQGYLIK.[D]	1xKpyri_pc [K3]	P39023 [284-294]	1.083	9.528	18	1553.88
[-].MAAKVFESIGK.[F]	1xMet-loss+Acetyl [N-Term]; 1xKpyri_pc [K4]	P35232 [1-11]	1.041	0.756	9	1349.72
[-].MAATTGSGVKVPR.[N]	1xMet-loss+Acetyl [N-Term]; 1xKpyri_pc [K10]	Q13404 [1-13]	0.638	21.656	14	1443.77
[-].MAAYKLVLIR.[H]	1xMet-loss+Acetyl [N-Term]; 1xKpyri_pc [K5]	P18669 [1-10]	0.969	2.324	11	1346.79
[-].MACARPLISVYSEKGESSGK.[N]	1xCarbamidomethyl [C3]; 1xMet-loss+Acetyl [N-Term]; 1xKpyri_pc [K14]	P36578 [1-20]	1.086	0.925	18	2339.14
[-].MAEEQPQVELFVKAGSDGAK.[I]	1xMet-loss+Acetyl [N-Term]; 1xKpyri_pc [K13]	O00299 [1-20]	1.335	0.356	8	2303.13
[-].MAGKQAVSASGK.[W]	1xMet-loss+Acetyl [N-Term]; 1xKpyri_pc [K4]	P14927 [1-12]	0.935	2.506	11	1303.68
[-].MAGPESDAQYQFTGIKK.[Y]	1xMet-loss [N-Term]; 1xKpyri_pc [K]	Q96IX5 [1-17]	0.968	1.968	12	1997.97
[-].MAKISSPTETER.[C]	1xMet-loss+Acetyl [N-Term]; 1xKpyri_pc [K3]	P31949 [1-12]	1.101	6.665	47	1518.75
[-].MALHVPKAPGFAQMLK.[E]	1xMet-loss+Acetyl [N-Term]; 1xKpyri_pc [K7]	P50990 [1-16]	1.078	0.437	3	1908.03
[-].MAQDQGEKENPMR.[E]	1xMet-loss+Acetyl [N-Term]; 1xKpyri_pc [K8]	P62913 [1-13]	1.005	6.792	12	1702.76
[-].MAQNLKDLAGR.[L]	1xMet-loss+Acetyl [N-Term]; 1xKpyri_pc [K6]	Q99623 [1-11]	1.047	2.048	31	1385.73
[-].MAQNLKDLAGRLPAGPR.[G]	1xMet-loss+Acetyl [N-Term]; 1xKpyri_pc [K6]	Q99623 [1-17]	1.004	0.348	7	1977.08
[-].MASLSLAPVNIFKAGADEER.[A]	1xMet-loss+Acetyl [N-Term]; 1xKpyri_pc [K13]	P78371 [1-20]	0.749	2.513	13	2288.17
[-].MPHAFKPGDLVFAK.[M]	1xMet-loss [N-Term]; 1xKpyri_pc [K6]	Q7Z4V5 [1-14]	0.867	0.572	26	1684.9
[R].LGLGEGAEEKSIPTLISR.[L]	1xKpyri_pc [K10]	P18754 [326-343]	0.581	0.455	11	2128.14
[K].LGGSAVISLEGKPL.[-]	1xKpyri_pc [K12]	P23528 [153-166]	0.85	1.859	9	1598.89
[K].KLLDLVQQSCNYK.[Q]	1xCarbamidomethyl [C10]; 1xKpyri_pc [K1]	P55769 [21-33]	0.943	0.874	13	1866.95
[R].KLLEGEEER.[L]	1xKpyri_pc [K1]	P20700 [379-387]; P02545 [378-386]	1	4.366	22	1360.69
[R].KLLEGEESR.[LI]	1xKpyri_pc [K1]	P08670 [402-410]; P05787 [393-401]	0.929	19.326	91	1318.68
[K].KLNVTEQEK.[I]	1xKpyri_pc [K1]	P06733 [81-89]	0.925	7.042	27	1346.71
[R].KLPHELCTLIR.[N]	1xCarbamidomethyl [C7]; 1xKpyri_pc [K1]	Q10713 [460-470]	0.945	0.642	49	1637.89
[R].KIQALQQQADEAEDR.[A]	1xKpyri_pc [K1]	P67936 [13-27]	1.088	37.193	17	2000.98
[R].KITIGQAPTEK.[G]	1xKpyri_pc [K1]	P11586 [543-553]	0.999	6.256	9	1443.8
[K].KLYDIDVAK.[V]	1xKpyri_pc [K1]	P62750 [115-123]	1.044	3.826	80	1322.71
[K].KIYEDGDDDMKR.[T]	1xKpyri_pc [K1]	Q9HB71 [197-208]	1.984	15.303	5	1742.78
[K].KNHEEEISTLR.[G]	1xKpyri_pc [K1]	P08727 [216-226]	0.999	51.933	23	1613.8
[K].KLLADQAEAR.[R]	1xKpyri_pc [K1]	P84098 [153-162]	1.318	11.777	24	1372.73
[K].KNKEEAAEYAK.[L]	1xKpyri_pc [K]	P62753 [201-211]	0.891	5.557	17	1538.76
[K].KPGMFFNPEESELDLTYGNR.[Y]	1xKpyri_pc [K1]	P11413 [408-427]	0.673	0.982	10	2602.2
[K].KPGMFFNPEESELDLTYGNR.[Y]	1xOxidation [M4]; 1xKpyri_pc [K1]	P11413 [408-427]	0.766	1.926	8	2618.2
[R].KQDADSLQR.[A]	1xKpyri_pc [K1]	P14324 [142-150]	0.862	1.581	30	1318.65
[K].KQLQAIEFNK.[A]	1xKpyri_pc [K1]	O76094 [301-310]	0.973	0.746	9	1476.8
[R].KQMVIDVLHPGK.[A]	1xKpyri_pc [K1]	P62847 [21-32]	1.034	3.113	21	1622.88
[R].KQVVNIPSFIVR.[L]	1xKpyri_pc [K1]	P46781 [139-150]	1.173	5.168	34	1657.95
[K].KSAEFLLHMLK.[N]	1xKpyri_pc [K1]	P18621 [86-96]	0.947	1.644	20	1574.85
[R].KSDGIYIINLK.[R]	1xKpyri_pc [K1]	P08865 [42-52]	0.945	26.891	25	1521.84
[K].KSLESINSR.[L]	1xKpyri_pc [K1]	P62888 [9-17]	1.02	6.837	41	1291.68
[R].KSSTPEEVK.[K]	1xKpyri_pc [K1]	P23528 [22-30]	1.051	10.35	48	1262.64
[K].KNLQYYDISAK.[S]	1xKpyri_pc [K1]	P62826 [142-152]	0.986	8.468	44	1600.81
[R].KLGINSLQELK.[Q]	1xKpyri_pc [K1]	P55327 [110-120]	0.893	10.762	9	1500.85
[R].KIGLETVGVK.[I]	1xKpyri_pc [K1]	Q16881 [449-458]	1.108	3.26	19	1301.76
[R].KLGGSQEDQIK.[N]	1xKpyri_pc [K1]	P37837 [71-81]	1.68	22.583	5	1460.75
[R].KIAFAITAIK.[G]	1xKpyri_pc [K1]	P62269 [25-34]	0.922	4.452	11	1333.8
[R].KIAVAAASKPAVEIK.[Q]	1xKpyri_pc [K1]	P29373 [31-45]	1.347	12.141	10	1754.03
[R].KLAVNMVPFPR.[L]	1xKpyri_pc [K1]	Q13509 [252-262]; P04350 [252-262]; Q9BUF5 [252-262]; P07437 [252-262]; P68371 [252-262]; Q9BVA1 [252-262]	0.973	18.707	58	1529.84
[K].KLDEAVAEAHLGK.[L]	1xKpyri_pc [K1]	P23526 [389-401]	0.932	0.552	20	1638.86
[R].KLDELYGTWR.[K]	1xKpyri_pc [K1]	P36578 [259-268]	0.883	11.044	20	1538.78
[R].KLDPGSEETQTLVR.[E]	1xKpyri_pc [K1]	P26641 [401-414]	0.878	2.444	46	1830.93
[K].KLEDVKNSPTFK.[S]	1xKpyri_pc [K]	P55327 [164-175]	1.024	3.894	11	1663.88
[R].KIEEIKDFLLTAR.[R]	1xKpyri_pc [K]	P63173 [4-16]	0.812	4.671	56	1834.02
[R].KIEFSLPDLEGR.[T]	1xKpyri_pc [K1]	P35998 [340-351]	0.871	0.71	7	1661.86
[K].KLEGNSPQGSNQGVK.[I]	1xKpyri_pc [K1]	P61006 [176-190]	0.788	4.281	4	1800.9
[K].KLELSDNR.[V]	1xKpyri_pc [K1]	P39687 [68-75]	1.209	1.682	42	1232.64
[K].KLELSENR.[I]	1xKpyri_pc [K1]	Q92688 [68-75]	1.297	2.36	77	1246.65
[K].KIEISQHAK.[Y]	1xKpyri_pc [K1]	P61513 [28-36]	1.222	2.831	28	1311.72
[K].KIESFGSK.[S]	1xKpyri_pc [K1]	P30405 [183-190]	0.989	2.561	7	1153.6
[R].KLFIGGLSFETTDESLR.[S]	1xKpyri_pc [K1]	P09651 [15-31]	0.822	0.749	3	2171.11
[R].KLFNLSKEDDVR.[Q]	1xKpyri_pc [K1]	P62753 [143-154]	1.027	3.23	17	1721.9
[K].KIFVGGIKEDTEEYNLR.[D]	1xKpyri_pc [K1]	P51991 [127-143]	1.518	9.857	9	2269.16
[K].KIFVGGLSPDTPEEK.[I]	1xKpyri_pc [K1]	Q14103 [183-197]	1.055	1.957	14	1874.96
[R].KIGDTSVSYK.[Y]	1xKpyri_pc [K1]	P20700 [474-483]	1.159	9.312	2	1355.7
[K].KLGEMWNNTAADDKQPYEK.[K]	1xKpyri_pc [K1]	P09429 [128-146]	1.169	2.557	39	2496.16
[K].KLGEMWNNTAADDKQPYEK.[K]	1xOxidation [M5]; 1xKpyri_pc [K1]	P09429 [128-146]	0.757	4.509	16	2512.16
[K].KLGEMWSEQSAK.[D]	1xKpyri_pc [K1]	P26583 [128-139]	1.056	11.99	38	1651.79
[K].KLGEMWSEQSAK.[D]	1xOxidation [M5]; 1xKpyri_pc [K1]	P26583 [128-139]	0.461	4.549	5	1667.78
[K].KSTDEPSEK.[D]	1xKpyri_pc [K1]	P09467 [143-151]	1.049	10.948	11	1278.6
[K].KSTDEPSEKDALQPGR.[N]	1xKpyri_pc [K1]	P09467 [143-158]	0.418	4.038	4	2015.98
[K].KTGKTVSYLGLE.[-]	1xKpyri_pc [K4]	O00244 [57-68]	0.954	1.383	5	1553.83
[K].KTHETLSHAGQK.[A]	1xKpyri_pc [K1]	Q16890 [98-109]	0.888	3.279	23	1594.81
[R].LDHKFDLMYAK.[R]	1xOxidation [M8]; 1xKpyri_pc [K4]	A6NHL2 [398-408]; Q71U36 [391-401]; P68363 [391-401]; Q9BQE3 [391-401]	1.014	23.402	24	1654.8
[R].LDHKFDLMYAKR.[A]	1xKpyri_pc [K]	A6NHL2 [398-409]; Q71U36 [391-402]; P68363 [391-402]; Q9BQE3 [391-402]	1.333	15.973	37	1794.91
[R].IDHYLGKEMVQNLMVLR.[F]	1xOxidation [M]; 1xKpyri_pc [K7]	P11413 [199-215]	0.816	0.851	3	2333.19
[K].LDKAQIHDLVLVGGSTR.[I]	1xKpyri_pc [K3]	P0DMV9 [326-342]	0.891	0.494	18	2080.13
[K].LDKSQIHDIVLVGGSTR.[I]	1xKpyri_pc [K3]	P11142 [326-342]	1.037	2.524	33	2096.12
[K].IDLKFIDTTSK.[F]	1xKpyri_pc [K4]	P39023 [363-373]	0.965	5.882	43	1538.82
[K].IDISNVKIPK.[H]	1xKpyri_pc [K7]	Q02878 [201-210]	0.871	6.974	6	1384.79
[R].IDQVNQLLELDHQKR.[G]	1xKpyri_pc [K14]	P61201 [402-416]	0.983	1.481	25	2107.1
[R].LDSQKHIDFSLR.[S]	1xKpyri_pc [K5]	P46781 [151-162]	1.064	6.724	104	1716.88
[K].LEAKTGVNR.[S]	1xKpyri_pc [K4]	Q00765 [26-34]	1.028	6.827	35	1245.67
[K].IECEIKINHEGEVNR.[A]	1xCarbamidomethyl [C3]; 1xKpyri_pc [K6]	Q16576 [114-128]	1.257	18.113	37	2098.01
[R].IEEELGSKAK.[F]	1xKpyri_pc [K8]	P06733 [413-422]	0.941	2.447	7	1361.71
[K].IEEIKDFLLTAR.[R]	1xKpyri_pc [K5]	P63173 [5-16]	1.204	5.366	4	1705.93
[K].LEEVLTNKK.[T]	1xKpyri_pc [K]	P78417 [153-161]	1.184	4.616	9	1331.73
[R].IEPADAHVLQKNLK.[V]	1xKpyri_pc [K11]	Q9GZZ1 [142-155]	0.581	0.651	17	1834
[K].LEQSTIVKER.[G]	1xKpyri_pc [K8]	Q02790 [267-276]	1.092	6.251	18	1460.79
[K].IFKSQGAALDK.[Y]	1xKpyri_pc [K3]	P40925 [108-118]	0.549	13.098	26	1435.77
[K].LFNLSKEDDVR.[Q]	1xKpyri_pc [K6]	P62753 [144-154]	0.916	6.03	25	1593.8
[K].LFVGGIKEDTEEHHLR.[D]	1xKpyri_pc [K7]	P22626 [114-129]; P09651 [107-122]	1.24	0.285	17	2138.08
[K].IFVGGLSPDTPEEKIR.[E]	1xKpyri_pc [K14]	Q14103 [184-199]	1.421	1.391	15	2016.05
[R].IGDKEGALTAFR.[K]	1xKpyri_pc [K4]	Q15008 [114-125]	0.898	8.811	13	1535.8
[K].IGEGTYGVVYKGR.[H]	1xKpyri_pc [K11]	P06493 [10-22]	1.003	3.356	29	1656.85
[R].IGEKYVDMSVK.[T]	1xKpyri_pc [K4]	P48047 [189-199]	1.084	4.679	25	1526.77
[R].LDHKFDLMYAK.[R]	1xKpyri_pc [K]	A6NHL2 [398-408]; Q71U36 [391-401]; P68363 [391-401]; Q9BQE3 [391-401]	1.043	21.138	69	1638.81
[K].IGHPAPNFKATAVMPDGQFK.[D]	1xKpyri_pc [K9]	Q06830 [8-27]	3.111	65.503	9	2384.2
[K].IDDKPVKIDKWDGSAVK.[N]	1xKpyri_pc [K10]	Q15005 [41-57]	0.395	25.474	2	2172.14
[K].IAVAAASKPAVEIKQEGDTFYIK.[T]	1xKpyri_pc [K]	P29373 [32-54]	1.098	0.586	11	2707.45
[R].KTLLLCSPQPDGK.[V]	1xCarbamidomethyl [C6]; 1xKpyri_pc [K1]	Q9BSV6 [286-298]	1.007	9.59	9	1714.89
[K].KTQETLSQAGQK.[T]	1xKpyri_pc [K1]	O43399 [128-139]	0.925	4.028	24	1576.81
[K].KTSETLSQAGQK.[A]	1xKpyri_pc [K1]	P55327 [138-149]	0.894	5.752	59	1535.78
[K].KTTHFVEGGDAGNREDQINR.[L]	1xKpyri_pc [K1]	P18124 [223-242]	1.958	1.093	16	2502.19
[R].KTVGVEPAADGK.[G]	1xKpyri_pc [K1]	P46779 [47-58]	0.985	16.573	57	1429.74
[K].KVAAIEALNDGELQK.[A]	1xKpyri_pc [K1]	Q8IZP2 [114-128]	1.127	19.282	20	1856.99
[K].KVEEAEPEEFVVEK.[V]	1xKpyri_pc [K1]	Q13185 [21-34]	1.101	1.168	13	1919.94
[R].KVFANPEDCVAFGK.[G]	1xCarbamidomethyl [C9]; 1xKpyri_pc [K1]	P10620 [42-55]	1.057	0.299	45	1839.88
[R].KVFANPEDCVAFGKGENAK.[K]	1xCarbamidomethyl [C9]; 1xKpyri_pc [K]	P10620 [42-60]	1.004	0.106	23	2339.12
[R].KVIDDTNITR.[L]	1xKpyri_pc [K1]	P05783 [187-196]	1.102	20.842	132	1432.75
[R].KVVLEAPDETTLK.[E]	1xKpyri_pc [K1]	Q6GMV3 [80-92]	2.509	19.927	7	1700.92
[K].KVVNPLFEK.[R]	1xKpyri_pc [K1]	P62424 [26-34]	0.902	5.848	18	1331.75
[K].KVWLDPNETNEIANANSR.[Q]	1xKpyri_pc [K1]	P84098 [21-38]	1.014	4.707	65	2329.13
[K].KYAEAVTR.[A]	1xKpyri_pc [K1]	P00558 [323-330]	1.011	2.085	91	1195.62
[K].KYEEIDNAPEER.[A]	1xKpyri_pc [K1]	P49411 [94-105]	1.167	3.461	28	1750.8
[K].KYGPFVADFADKLNEQK.[L]	1xKpyri_pc [K1]	P24539 [115-131]	1.076	0.113	3	2228.11
[R].KYTLPPGVDPTQVSSSLSPEGTLTVEAPMPK.[L]	1xKpyri_pc [K1]	P04792 [141-171]	0.602	3.89	19	3484.77
[R].LAADVGKAGAER.[E]	1xKpyri_pc [K7]	P05141 [141-152]	1.203	1.908	18	1415.74
[R].IAGQVAAANKK.[H]	1xKpyri_pc [K10]	P39019 [134-144]	1.645	71.445	19	1328.74
[R].LAKADGIVSK.[N]	1xKpyri_pc [K3]	P63220 [72-81]	1.106	13.885	36	1259.71
[K].IAQGVSGSIQDKGSIQK.[F]	1xKpyri_pc [K12]	P20839 [439-455]	1.008	0.997	5	1974.04
[R].YYKNIGLGFK.[T]	1xKpyri_pc [K3]	P62280 [36-45]	0.919	10.381	9	1460.77
[K].IAVAAASKPAVEIK.[Q]	1xKpyri_pc [K8]	P29373 [32-45]	0.906	25.114	25	1625.94
[R].ICLDILKDK.[W]	1xCarbamidomethyl [C2]; 1xKpyri_pc [K7]	P61088 [86-94]	1.264	32.008	8	1375.74
[-].MPSKGPLQSVQVFGR.[K]	1xMet-loss [N-Term]; 1xKpyri_pc [K4]	P62249 [1-15]	1.021	0.206	113	1757.94
[-].MPVTEKDLAEDAPWKK.[I]	1xMet-loss [N-Term]; 1xKpyri_pc [K6]	O75369 [1-16]	1.64	1.383	21	1985.01
[K].MQASIEKGGSLPK.[V]	1xOxidation [M1]; 1xKpyri_pc [K7]	P06748 [251-263]	2.672	36.221	6	1619.82
[R].VFDKEGNGTVMGAEIR.[H]	1xKpyri_pc [K4]	P60660 [95-110]	1.158	2.163	14	1980.96
[R].VFEVQKVK.[Q]	1xKpyri_pc [K]	Q9BS40 [31-38]	1.041	2.623	31	1234.69
[K].VFQFLNAKCESAFLSK.[R]	1xCarbamidomethyl [C9]; 1xKpyri_pc [K8]	P83731 [28-43]	1.1	0.296	3	2147.07
[K].VGEFSGANKEK.[L]	1xKpyri_pc [K9]	P10599 [86-96]	1.056	33.792	13	1423.7
[K].VGKEDSSSTEFVEKR.[R]	1xKpyri_pc [K14]	O60749 [221-235]	1.179	0.14	18	1955.95
[K].VGINYQPPTVVPGGDLAKVQR.[A]	1xKpyri_pc [K18]	Q71U36 [353-373]; P68363 [353-373]; Q9BQE3 [353-373]	1.045	3.909	64	2466.33
[R].VKDASPNQVAEKVASR.[I]	1xKpyri_pc [K12]	O43402 [99-114]	1.031	0.708	5	1957.03
[K].VKEDPDGEHAR.[R]	1xKpyri_pc [K2]	P52272 [144-154]	1.053	1.355	40	1510.7
[K].VKEGMNIVEAMER.[F]	1xKpyri_pc [K2]	P62937 [132-144]	1.609	4.735	36	1763.86
[K].VKLEAEIATYR.[R]	1xKpyri_pc [K2]	P05783 [371-381]	1.007	75.67	65	1550.83
[R].VFDKDGNGYISAAELR.[H]	1xKpyri_pc [K4]	P0DP25 [92-107]	0.993	10.832	64	2012.98
[R].VKLLLQVQHASK.[Q]	1xKpyri_pc [K2]	P12236 [32-43]; P05141 [32-43]; P12235 [32-43]	1.083	0.383	63	1621.95
[RK].VKLQIWDTAGQER.[FY]	1xKpyri_pc [K2]	Q15286 [57-69]	0.994	4.048	15	1801.93
[K].VKQASMEDIPGR.[G]	1xKpyri_pc [K2]	Q9BS40 [37-48]	1.101	1.895	42	1588.79
[K].VKQASMEDIPGR.[G]	1xOxidation [M6]; 1xKpyri_pc [K2]	Q9BS40 [37-48]	0.903	3.564	20	1604.78
[R].VKYETELAMR.[Q]	1xKpyri_pc [K2]	P05783 [166-175]	1.059	24.357	26	1497.75
[K].VLADTKELVSSK.[V]	1xKpyri_pc [K6]	O60664 [117-128]	0.941	0.481	14	1547.84
[K].VIAINVDDPDAANYNDINDVKR.[L]	1xKpyri_pc [K21]	Q15181 [156-177]	0.881	2.696	12	2702.32
[K].VLDSGAPIKIPVGPETLGR.[I]	1xKpyri_pc [K9]	P06576 [125-143]	0.98	4.872	19	2177.21
[K].VLEQLTGQTPVFSKAR.[Y]	1xKpyri_pc [K14]	P62913 [39-54]	0.955	14.464	28	2032.1
[K].VLKAQAQSQK.[A]	1xKpyri_pc [K3]	P49207 [106-115]	0.866	10.901	29	1358.75
[K].VLKQVHPDTGISSK.[A]	1xKpyri_pc [K3]	Q16778 [45-58]; Q5QNW6 [45-58]; P58876 [45-58]	1.091	4.819	89	1766.95
[K].VKIMLPWDPTGK.[I]	1xKpyri_pc [K2]	P23396 [186-197]	1.085	4.479	5	1642.88
[R].VETGVLKPGMVVTFAPVNVTTEVK.[S]	1xKpyri_pc [K7]	P68104 [267-290]	0.798	2.978	20	2773.5
[K].VELCSFSGYKIYPGHGR.[R]	1xCarbamidomethyl [C4]; 1xKpyri_pc [K10]	P83731 [3-19]	1.056	0.343	35	2228.07
[K].VEKVTISNR.[L]	1xKpyri_pc [K3]	P08238 [575-583]	1.382	9.15	25	1303.71
[K].TVDGPSGKLWR.[D]	1xKpyri_pc [K8]	P04406 [187-197]	1.053	47.997	48	1473.76
[K].TVTAMDVVYALKR.[Q]	1xKpyri_pc [K12]	P62805 [81-93]	0.967	3.275	25	1724.92
[K].TVTAMDVVYALKR.[Q]	1xOxidation [M5]; 1xKpyri_pc [K12]	P62805 [81-93]	0.929	8.698	21	1740.91
[R].TYDATTHFETTCDDIKNIYKR.[M]	1xCarbamidomethyl [C12]; 1xKpyri_pc [K]	P50395 [403-423]	0.985	0.06	25	2850.32
[K].TYSAKLDNAR.[Q]	1xKpyri_pc [K5]	P02545 [266-275]	1.253	5.428	5	1396.7
[K].VADWTGATYQDKR.[Y]	1xKpyri_pc [K12]	O15371 [42-54]	1.865	2.691	7	1768.84
[R].VAELLLAKAAGPELR.[V]	1xKpyri_pc [K8]	Q5T6V5 [31-45]	0.967	0.712	10	1809.04
[K].VAHSDKPGSTSTASFR.[D]	1xKpyri_pc [K6]	Q9P0L0 [206-221]	1.221	26.003	27	1905.92
[R].VAKVTGGAASK.[L]	1xKpyri_pc [K3]	P42766 [33-43]	0.912	13.691	24	1246.69
[R].VAPEEHPVLLTEAPLNPKANR.[E]	1xKpyri_pc [K18]	P60709 [96-116]; P63261 [96-116]	1.026	3.942	98	2553.36
[K].VAQGVSGAVQDKGSIHK.[F]	1xKpyri_pc [K12]	P12268 [439-455]	0.862	1.099	5	1939.01
[K].VAQPKEVYQQQQYGSGGR.[G]	1xKpyri_pc [K5]	Q99729 [228-245]	0.906	1.607	19	2281.11
[K].VASVAENKGLFEEAAK.[L]	1xKpyri_pc [K8]	Q8N1F7 [612-627]	0.913	0.515	15	1920.98
[K].VAVKILNR.[Q]	1xKpyri_pc [K4]	Q13131 [53-60]	0.714	1.064	16	1170.71
[K].VDENGKISR.[L]	1xKpyri_pc [K6]	P62979 [108-116]	1.032	47.855	3	1275.64
[R].VDKAAAAAAALQAK.[S]	1xKpyri_pc [K3]	P36578 [351-364]	0.824	55.898	24	1556.85
[K].VDKGVVPLAGTNGETTTQGLDGLSER.[C]	1xKpyri_pc [K3]	P04075 [109-134]	1.049	0.587	18	2872.44
[K].VDKLDASESLR.[K]	1xKpyri_pc [K3]	Q00610 [1610-1620]	0.926	9.445	2	1490.76
[R].VDNIIKAAPR.[K]	1xKpyri_pc [K6]	P78371 [517-526]	1.06	9.343	43	1354.76
[K].VEAKFINYVK.[N]	1xKpyri_pc [K4]	P06748 [264-273]	0.927	7.012	27	1468.79
[K].VEAQVYILSKEEGGR.[H]	1xKpyri_pc [K10]	P49411 [355-369]	0.749	4.189	6	1935.99
[K].VEEEIQTLSQVLAAKEK.[H]	1xKpyri_pc [K15]	P55327 [86-102]	0.73	2.366	2	2173.15
[K].VEEIAASK.[C]	1xKpyri_pc [K8]	Q02543 [129-136]	1.066	4.382	48	1104.57
[R].VIIEKYYTR.[L]	1xKpyri_pc [K5]	P08708 [15-23]	1.29	9.165	75	1442.78
[R].VLLGETGKEK.[L]	1xKpyri_pc [K8]	P62280 [23-32]	1.098	13.041	10	1331.73
[K].VILKNSQGEEVAQR.[S]	1xKpyri_pc [K4]	P20700 [529-542]	1.101	9.075	11	1828.97
[R].VISSIEQKTDTSDKK.[L]	1xKpyri_pc [K8]	P27348 [61-75]	1.476	3.967	4	1937
[R].VVSSIEQKTEGAEKK.[Q]	1xKpyri_pc [K8]	P63104 [61-75]	1.151	0.804	72	1890.99
[K].VYVGNLGTGAGKGELER.[A]	1xKpyri_pc [K12]	Q16629 [13-29]	1.986	2.353	2	1978.01
[K].WSLLQQQKTAR.[S]	1xKpyri_pc [K8]	P05787 [123-133]	1.057	41.819	10	1616.87
[K].YAGKDGYNYTLSK.[T]	1xKpyri_pc [K4]	P31949 [24-36]	0.932	5.397	36	1737.82
[K].YALTGDEVKK.[I]	1xKpyri_pc [K9]	P62701 [54-63]	0.977	4.059	11	1381.71
[R].YALYDASFETKESR.[K]	1xKpyri_pc [K11]	P60981 [82-95]	1.344	6.19	10	1937.9
[R].YALYDATYETKESK.[K]	1xKpyri_pc [K11]	P23528 [82-95]	1.033	4.642	33	1939.91
[K].YEELQSLAGKHGDDLR.[R]	1xKpyri_pc [K10]	P05787 [286-301]	0.996	18.011	37	2089.01
[K].YEELQSLAGKHGDDLRR.[T]	1xKpyri_pc [K10]	P05787 [286-302]	1.101	3.478	40	2245.11
[K].YEKDIAAYR.[A]	1xKpyri_pc [K3]	P26583 [155-163]; P09429 [155-163]	0.89	7.457	42	1386.68
[R].YGGETKVYVGNLGTGAGK.[G]	1xKpyri_pc [K6]	Q16629 [7-24]	0.894	8.089	14	2029.01
[K].YGKDATNVGDEGGFAPNILENK.[E]	1xKpyri_pc [K3]	P06733 [200-221]	0.751	1.564	11	2567.22
[R].YKLLGGLAVR.[R]	1xKpyri_pc [K2]	P23396 [107-116]	1.01	11.955	57	1347.79
[R].YLAEVAAGDDKK.[G]	1xKpyri_pc [K]	P63104 [128-139]	1.019	2.673	20	1537.76
[R].YLAEVATGEKR.[A]	1xKpyri_pc [K10]	P61981 [133-143]	0.549	2.977	14	1494.77
[R].YIEIFKSSR.[A]	1xKpyri_pc [K6]	P31943 [180-188]	1.003	4.797	7	1400.73
[R].YIGIVKQAGLER.[M]	1xKpyri_pc [K6]	P52597 [219-230]	0.923	4.425	38	1604.89
[R].YISPDQLADLYKSFIK.[D]	1xKpyri_pc [K12]	P06733 [270-285]	0.846	6.505	8	2159.12
[R].YLYTLVITDKEK.[A]	1xKpyri_pc [K]	P63173 [41-52]	0.505	0.918	13	1743.93
[R].YLYTLVITDKEKAEK.[L]	1xKpyri_pc [K]	P63173 [41-55]	1.241	4.201	3	2072.11
[R].YQKSTELLIR.[K]	1xKpyri_pc [K3]	Q5TEC6 [55-64]; P68431 [55-64]	1.116	19.723	45	1508.82
[R].YSVDIPLDKTVVNK.[D]	1xKpyri_pc [K9]	P61353 [85-98]	0.297	9.083	8	1848.99
[R].YVDSSKAVIETADR.[A]	1xKpyri_pc [K6]	Q08752 [252-265]	1.078	0.881	20	1811.89
[R].VVSSIEQKTEGAEK.[K]	1xKpyri_pc [K8]	P63104 [61-74]	0.887	6.878	48	1762.9
[K].TQLKGSELEITLTR.[G]	1xKpyri_pc [K4]	P41252 [1058-1071]	1.372	4.925	4	1847
[K].VVSETNDTKVLR.[H]	1xKpyri_pc [K9]	P05783 [418-429]	1.133	98.186	50	1618.85
[K].VVKQASEGPLK.[G]	1xKpyri_pc [K3]	P04406 [261-271]	0.979	43.947	34	1413.78
[R].VISSIEQKTER.[N]	1xKpyri_pc [K8]	P31946 [63-73]	1.114	2.8	36	1547.82
[R].VITEEEKNFK.[A]	1xKpyri_pc [K7]	P26373 [168-177]	0.96	3.404	10	1494.76
[R].VITEEEKNFKAFASLR.[M]	1xKpyri_pc [K]	P26373 [168-183]	0.718	0.906	13	2140.12
[R].VLTVINQTQKENLR.[K]	1xKpyri_pc [K10]	P42766 [57-70]	0.917	11.547	19	1914.06
[R].VLVNDAQKVTEGQQER.[L]	1xKpyri_pc [K8]	Q13263 [312-327]	0.892	2.717	18	2072.05
[R].VMLGETNPADSKPGTIR.[G]	1xKpyri_pc [K12]	P15531 [89-105]; P22392 [89-105]	0.922	2.897	53	2044.03
[R].VMLGETNPADSKPGTIR.[G]	1xOxidation [M2]; 1xKpyri_pc [K12]	P15531 [89-105]; P22392 [89-105]	0.915	5.502	22	2060.02
[K].VNGKAGNLGGGVVTIER.[S]	1xKpyri_pc [K4]	P35268 [49-65]	1.189	3.469	24	1899.02
[K].VPEWVDTVKLAK.[H]	1xKpyri_pc [K9]	P39019 [30-41]	1.237	5.869	14	1642.9
[K].VQAGDVITIDKATGK.[I]	1xKpyri_pc [K11]	Q9Y230 [187-201]	0.894	1.224	16	1773.95
[K].VRDKLNNLVLFDK.[A]	1xKpyri_pc [K4]	P62851 [40-52]	0.887	27.966	20	1832.02
[R].VSFELFADKVPK.[T]	1xKpyri_pc [K9]	P62937 [20-31]	0.431	2.786	25	1637.87
[R].VSFELFADKVPKTAENFR.[A]	1xKpyri_pc [K12]	P62937 [20-37]	0.734	2.96	19	2356.21
[K].VSGSQIVDIDKR.[K]	1xKpyri_pc [K11]	P60520 [36-47]	1.159	22.538	12	1574.83
[R].VSLDVNHFAPDELTVKTK.[D]	1xKpyri_pc [K16]	P04792 [97-114]	1.185	2.447	39	2271.18
[K].VTDDLVCLVYKTDQAQDVK.[K]	1xCarbamidomethyl [C7]; 1xKpyri_pc [K11]	P49458 [42-60]	0.936	1.019	6	2468.21
[K].VTDDLVCLVYKTDQAQDVKK.[I]	1xCarbamidomethyl [C7]; 1xKpyri_pc [K11]	P49458 [42-61]	1.196	0.722	4	2596.31
[K].VTEGSFVYKGGK.[I]	1xKpyri_pc [K9]	P50395 [104-115]	0.97	2.201	36	1529.77
[K].VTGGAASKLSK.[I]	1xKpyri_pc [K8]	P42766 [36-46]	0.753	5.46	9	1276.7
[R].VVANSKESYELR.[Y]	1xKpyri_pc [K6]	P35268 [102-113]	1.086	5.159	22	1652.84
[R].VVDALGNAIDGKGPIGSK.[T]	1xKpyri_pc [K12]	P25705 [150-167]	0.905	3.498	21	1969.05
[K].VVDLLAPYAKGGK.[I]	1xKpyri_pc [K10]	P06576 [189-201]	1.033	2.911	55	1588.88
[K].VVGAKVVTNAR.[S]	1xKpyri_pc [K5]	Q15424 [432-442]	0.824	12.21	13	1371.79
[K].VVLAYEPVWAIGTGKTATPQQAQEVHEK.[L]	1xKpyri_pc [K15]	P60174 [161-188]	0.745	1.37	13	3308.71
[R].TQGTKIASDGLK.[G]	1xKpyri_pc [K5]	P61247 [52-63]	0.963	7.957	26	1476.78
[R].TQEKEQIKTLNNK.[F]	1xKpyri_pc [K]	P05787 [89-101]	1.022	18.408	15	1831.97
[R].TQEKEQIK.[T]	1xKpyri_pc [K4]	P05787 [89-96]	1.002	27.131	15	1261.65
[K].NQKDPGVLDR.[M]	1xKpyri_pc [K3]	P31949 [53-62]	1.081	6.63	62	1399.71
[K].NVKLPDAYER.[L]	1xKpyri_pc [K3]	P11413 [430-439]	0.849	3.702	39	1462.74
[R].NVIFQPVAELKK.[Q]	1xKpyri_pc [K11]	Q01813 [726-737]	1.452	0.815	34	1643.93
[K].NYVNGKTFLEK.[R]	1xKpyri_pc [K6]	P25787 [166-176]	0.984	8.249	10	1570.8
[K].QAKVLENAEGAR.[T]	1xKpyri_pc [K3]	P38646 [74-85]	0.973	1.35	24	1543.8
[K].QANKEYLLGSTAEEK.[A]	1xKpyri_pc [K4]	O43324 [54-68]	1.041	1.482	12	1938.96
[R].QATKDAGQISGLNVLR.[V]	1xKpyri_pc [K4]	P38646 [203-218]	1.064	2.201	17	1929.03
[R].QATKDAGTIAGLNVLR.[I]	1xKpyri_pc [K4]	P11142 [156-171]	0.898	2.318	22	1886.02
[R].QATKDAGVIAGLNVLR.[I]	1xKpyri_pc [K4]	P0DMV9 [156-171]	0.858	1.098	14	1884.05
[R].QAWQKADINTK.[W]	1xKpyri_pc [K5]	P50914 [75-85]	1.135	3.439	8	1560.79
[K].QFAEMYVAKFAAK.[G]	1xKpyri_pc [K9]	P13639 [227-239]	1.044	0.351	23	1761.88
[K].QFAEMYVAKFAAK.[G]	1xOxidation [M5]; 1xKpyri_pc [K9]	P13639 [227-239]	1.189	1.316	22	1777.87
[K].QLDDLKVELSQLR.[V]	1xKpyri_pc [K6]	P42766 [20-32]	0.834	2.873	20	1814.98
[K].QIESKTAFQEALDAAGDK.[L]	1xKpyri_pc [K5]	P10599 [4-21]	0.984	1.913	5	2180.06
[R].QLETLGQEKLK.[L]	1xKpyri_pc [K9]	P05787 [150-160]	0.359	25.76	9	1544.84
[K].QIFLGGVDKR.[T]	1xKpyri_pc [K9]	P05141 [97-106]	0.905	2.378	24	1390.76
[K].QIYYSDKYDDEEFEYR.[H]	1xKpyri_pc [K7]	P61024 [5-20]	1.017	0.253	42	2421.03
[K].QSEPFFKATPEEK.[L]	1xKpyri_pc [K7]	P11413 [83-95]	0.977	2.227	13	1795.87
[K].QSLPPGLAVKELK.[-]	1xKpyri_pc [K10]	P63173 [58-70]	1.005	9.88	27	1637.94
[K].QTHNNAVVKMLPSFVR.[R]	1xKpyri_pc [K9]	P19367 [502-517]	0.993	0.406	70	2099.1
[R].QTVAVGVIKAVDK.[K]	1xKpyri_pc [K9]	P68104 [431-443]	0.98	41.985	27	1585.91
[R].QTVAVGVIKAVDKK.[A]	1xKpyri_pc [K9]	P68104 [431-444]	1.015	4.11	37	1714
[R].QTVAVGVIKNVEK.[K]	1xKpyri_pc [K9]	Q05639 [431-443]	0.539	4.113	16	1642.93
[R].NLLSVAYKNVVGAR.[R]	1xKpyri_pc [K8]	P63104 [42-55]; P31946 [44-57]; Q04917 [43-56]; P61981 [43-56]	1.123	2.381	27	1761.98
[K].QTYSTEPNNLKAR.[N]	1xKpyri_pc [K11]	P46779 [23-35]	1.112	10.781	20	1779.88
[R].NLKASLENSLR.[E]	1xKpyri_pc [K3]	P05783 [315-325]	1.027	12.646	85	1502.81
[K].NICKVVEVGSK.[I]	1xCarbamidomethyl [C3]; 1xKpyri_pc [K4]	P14618 [163-173]	1.053	2.028	3	1490.78
[R].MQKEITALAPSTMK.[I]	1xKpyri_pc [K3]	P60709 [313-326]; P68133 [315-328]; P63261 [313-326]	0.925	3.715	29	1806.92
[R].MQKEITALAPSTMK.[I]	1xOxidation [M]; 1xKpyri_pc [K3]	P60709 [313-326]; P68133 [315-328]; P63261 [313-326]	2.372	59.052	14	1822.92
[-].MSAKAISEQTGK.[E]	1xMet-loss+Acetyl [N-Term]; 1xKpyri_pc [K4]	P53396 [1-12]	0.821	3.362	18	1419.72
[-].MSEGDSVGESVHGKPSVVYR.[F]	1xMet-loss+Acetyl [N-Term]; 1xKpyri_pc [K14]	O15258 [1-20]	0.918	2.01	9	2289.09
[-].MSHTILLVQPTKRPEGR.[T]	1xMet-loss+Acetyl [N-Term]; 1xKpyri_pc [K12]	P84090 [1-17]	0.931	3.343	30	2132.17
[-].MSKSESPKEPEQLR.[K]	1xMet-loss+Acetyl [N-Term]; 1xKpyri_pc [K3]	P09651 [1-14]	0.971	2.586	31	1814.9
[-].MSKSFQQSSLSR.[D]	1xMet-loss+Acetyl [N-Term]; 1xKpyri_pc [K3]	P43243 [1-12]	0.992	2.774	15	1554.77
[-].MSLVIPEKFQHILR.[V]	1xMet-loss+Acetyl [N-Term]; 1xKpyri_pc [K8]	P62269 [1-14]	0.547	0.7	13	1880.05
[-].MSSGNAKIGHPAPNFK.[A]	1xMet-loss+Acetyl [N-Term]; 1xKpyri_pc [K7]	Q06830 [1-16]	1.048	10.015	66	1824.91
[-].MVDREQLVQKAR.[L]	1xMet-loss+Acetyl [N-Term]; 1xKpyri_pc [K10]	P61981 [1-12]	0.948	0.749	50	1641.88
[-].MVGVKPVGSDPDFQPELSGAGSR.[L]	1xMet-loss [N-Term]; 1xKpyri_pc [K5]	O43396 [1-23]	1.063	4.044	15	2457.22
[-].MVMEKPSPLLVGR.[E]	1xMet-loss [N-Term]; 1xKpyri_pc [K5]	Q13283 [1-13]; Q9UN86 [1-13]	0.837	1.179	52	1583.87
[K].NAGAVIGKGGK.[N]	1xKpyri_pc [K8]	P61978 [53-63]	0.973	5.629	10	1229.67
[R].NDEELNKLLGK.[V]	1xKpyri_pc [K7]	Q16777 [90-100]	1.91	25.636	22	1530.79
[R].NDEELNKLLGR.[V]	1xKpyri_pc [K7]	Q7L7L0 [90-100]	1.522	6.94	5	1558.8
[K].NGDLDEVKDYVAKGEDVNR.[T]	1xKpyri_pc [K]	P58546 [12-30]	0.609	0.905	5	2394.13
[K].NKDQGTYEDYVEGLR.[V]	1xKpyri_pc [K2]	P60660 [80-94]	0.844	3.606	35	2044.94
[K].NKEEAAEYAK.[L]	1xKpyri_pc [K2]	P62753 [202-211]	0.958	5.206	16	1410.66
[K].NKITQSNAILR.[Y]	1xKpyri_pc [K2]	P21266 [72-82]	1.312	9.721	55	1515.84
[K].NKPEWFFK.[K]	1xKpyri_pc [K2]	P78417 [58-65]	1.07	4.651	92	1353.67
[R].NKQTYSTEPNNLK.[A]	1xKpyri_pc [K2]	P46779 [21-33]	0.843	6.37	18	1794.88
[R].NKSTESLQANVQR.[L]	1xKpyri_pc [K2]	P26373 [104-116]	1.076	74.658	15	1732.87
[K].NKTGAAPIIDVVR.[S]	1xKpyri_pc [K2]	P46776 [93-105]	0.978	7.944	70	1611.9
[K].NLGIGKVSSFEEK.[M]	1xKpyri_pc [K6]	P40926 [302-314]	0.984	0.499	17	1665.86
[R].KKWDSNVIETFDIAR.[L]	1xKpyri_pc [K2]	Q9Y365 [93-107]	0.673	1.282	3	2080.06
[K].SAPELKTGISDVFAK.[N]	1xKpyri_pc [K6]	P19338 [319-333]	0.913	2.112	6	1820.95
[K].SDPYLEFHKQTSDGNWLMVHR.[T]	1xOxidation [M18]; 1xKpyri_pc [K9]	O75131 [159-179]	1.249	0.666	6	2834.31
[R].TFIAIKPDGVQR.[G]	1xKpyri_pc [K6]	P15531 [7-18]; P22392 [7-18]	1.033	10.781	38	1602.88
[K].TFVNITPAEVGVLVGKDR.[S]	1xKpyri_pc [K16]	P07737 [39-56]	0.743	1.628	17	2173.18
[K].TGKTVSYLGLE.[-]	1xKpyri_pc [K3]	O00244 [58-68]	1.017	2.651	52	1425.74
[K].THETLSHAGQKATAAFSNVGTAISK.[K]	1xKpyri_pc [K11]	Q16890 [99-123]	3.934	12.002	18	2785.4
[K].TKDGVVEITGK.[H]	1xKpyri_pc [K2]	P04792 [113-123]	1.022	16.27	43	1404.75
[K].TKDGVVEITGKHEER.[Q]	1xKpyri_pc [K]	P04792 [113-127]	1.352	10.83	40	1955.99
[K].TKEAVLLLK.[K]	1xKpyri_pc [K2]	P36578 [164-172]	1.175	7.755	15	1272.77
[K].TKEVYELLDSPGK.[V]	1xKpyri_pc [K2]	P22234 [18-30]	2.242	5.122	4	1736.89
[R].TKSTGGAPTFNVTVTK.[T]	1xKpyri_pc [K2]	P07737 [90-105]	0.854	5.232	14	1866.97
[R].TKTEISEMNR.[N]	1xKpyri_pc [K2]	P05787 [303-312]	0.988	34.726	76	1466.71
[R].TKTPGPGAQSALR.[A]	1xKpyri_pc [K2]	P62263 [105-117]	0.938	12.059	52	1541.82
[K].TKVEAFQTTISK.[Y]	1xKpyri_pc [K2]	Q9UL46 [155-166]	1.01	4.644	37	1610.85
[K].TIAPALVSKK.[L]	1xKpyri_pc [K]	P06733 [72-81]	1.102	6.074	34	1285.76
[R].TIAQDYGVLKADEGISFR.[G]	1xKpyri_pc [K10]	Q06830 [111-128]	0.638	4.488	39	2241.13
[K].TIGGGDDSFNTFFSETGAGKHVPR.[A]	1xKpyri_pc [K20]	Q71U36 [41-64]; P68363 [41-64]; Q9BQE3 [41-64]	1.009	3.285	30	2755.29
[K].TIKAQIWDTAGQER.[Y]	1xKpyri_pc [K3]	P62491 [59-72]; Q15907 [59-72]	2.632	5.383	25	1874.95
[K].TIKLQIWDTAGQER.[F]	1xKpyri_pc [K3]	P62820 [59-72]; Q9H0U4 [56-69]	1.189	1.908	32	1917
[K].TLNNKFASFIDK.[V]	1xKpyri_pc [K5]	Q5XKE5 [148-159]; P35908 [184-195]; P02538 [169-180]; P05787 [97-108]; P13647 [174-185]	0.862	23.032	102	1655.85
[K].TLNNKFASFIDKVR.[F]	1xKpyri_pc [K]	Q5XKE5 [148-161]; P35908 [184-197]; P02538 [169-182]; P05787 [97-110]; P13647 [174-187]	0.657	0.912	7	1911.02
[R].TNSTFNQVVLKR.[L]	1xKpyri_pc [K11]	Q07020 [39-50]	1.109	13.21	17	1664.89
[K].TPALVNAAVTYSKPR.[L]	1xKpyri_pc [K13]	O75964 [12-26]	1.219	6.693	51	1846
[K].TPKEAIEGTYIDKK.[C]	1xKpyri_pc [K3]	P62280 [46-59]	1.223	1.59	17	1850.96
[K].TPKGPSSVEDIK.[A]	1xKpyri_pc [K3]	P06748 [237-248]	1.158	6.629	16	1515.78
[K].TEWLDGKHVVFGK.[V]	1xKpyri_pc [K7]	P62937 [119-131]	1.045	0.721	119	1773.91
[K].SDGIYIINLKR.[T]	1xKpyri_pc [K10]	P08865 [43-53]	1.157	3.075	36	1549.85
[R].TEMENEFVLIKK.[D]	1xKpyri_pc [K11]	P05787 [187-198]	0.37	2.523	4	1738.88
[K].TDKTLVLLMGK.[E]	1xKpyri_pc [K3]	P07737 [106-116]	1.021	1.424	42	1476.82
[K].SDRPELTGAKVVVSGGR.[G]	1xKpyri_pc [K10]	P13804 [207-223]	1.25	3.148	4	1986.05
[K].SDVEAIFSKYGK.[I]	1xKpyri_pc [K9]	P07910 [31-42]	1.009	1.008	5	1601.8
[R].SEGVVAVLLTKK.[S]	1xKpyri_pc [K11]	P49327 [225-236]	1.176	0.491	11	1501.87
[K].SELEFKFNR.[K]	1xKpyri_pc [K6]	Q9NR45 [56-64]	0.917	5.034	28	1427.71
[K].SGDAAIVDMVPGKPMCVESFSDYPPLGR.[F]	1xCarbamidomethyl [C16]; 1xKpyri_pc [K13]	P68104 [396-423]	0.929	0.266	51	3253.51
[K].SGDAAIVDMVPGKPMCVESFSDYPPLGR.[F]	1xCarbamidomethyl [C16]; 1xOxidation [M]; 1xKpyri_pc [K13]	P68104 [396-423]	0.993	0.062	24	3269.51
[K].SGVGNIFIKNLDK.[S]	1xKpyri_pc [K9]	P11940 [96-108]	1.322	0.606	56	1662.9
[R].SGVSLAALKK.[A]	1xKpyri_pc [K]	P10412 [55-64]; P16403 [55-64]	0.322	7.395	15	1231.72
[R].SKAEEVVSFVK.[K]	1xKpyri_pc [K2]	Q9BWH2 [160-170]	1.777	5.385	4	1480.78
[K].SIKENASAGVER.[L]	1xKpyri_pc [K3]	P51153 [105-116]	1.083	8.563	54	1518.77
[K].SLVSKGTLVQTK.[G]	1xKpyri_pc [K5]	P16401 [89-100]; P10412 [86-97]; P16403 [86-97]	1.163	11.598	9	1518.86
[K].SIYGEKFEDENFILK.[H]	1xKpyri_pc [K6]	P62937 [77-91]	0.718	0.593	17	2090.02
[K].SQETECTYFSTPLLLGKK.[G]	1xCarbamidomethyl [C6]; 1xKpyri_pc [K17]	P40926 [280-297]	2.001	1.418	6	2360.16
[R].SSGPYGGGGQYFAKPR.[N]	1xKpyri_pc [K14]	P09651 [337-352]	0.811	2.716	43	1886.89
[R].SSKELLLQPVTISR.[N]	1xKpyri_pc [K3]	P59998 [42-55]	1.346	5.829	19	1829.03
[K].STGGAPTFNVTVTKTDK.[T]	1xKpyri_pc [K]	P07737 [92-108]	0.84	3.377	42	1982
[K].STHDHWKALVTK.[K]	1xKpyri_pc [K7]	Q15181 [222-233]	1.157	2.154	153	1680.86
[K].SVSDYDGKLSNFK.[T]	1xKpyri_pc [K8]	P07237 [264-276]	0.757	6.147	25	1717.82
[K].SYKVSTSGPR.[A]	1xKpyri_pc [K3]	P05787 [9-18]	0.877	7.594	47	1339.68
[R].SYSKLLCGLLAER.[L]	1xCarbamidomethyl [C7]; 1xKpyri_pc [K4]	P14174 [75-87]	0.868	0.429	13	1767.92
[K].TAIGKAGYTDK.[V]	1xKpyri_pc [K5]	P06733 [229-239]	0.923	13.187	37	1382.71
[R].TDAISEEKLR.[E]	1xKpyri_pc [K8]	Q9NR31 [139-148]	1.122	15.694	27	1419.72
[R].TDGKVFQFLNAK.[C]	1xKpyri_pc [K4]	P83731 [24-35]	0.867	1.789	31	1625.84
[K].TDKTLVLLMGK.[E]	1xOxidation [M9]; 1xKpyri_pc [K3]	P07737 [106-116]	1.103	4.104	23	1492.82
[K].KKESTNSMETR.[F]	1xKpyri_pc [K2]	P61758 [94-104]	1.099	0.039	16	1568.75
[R].LASYLDKVR.[A]	1xKpyri_pc [K7]	P08727 [91-99]; P13645 [157-165]	1.134	17.249	97	1322.72
[K].FASFIDKVR.[F]	1xKpyri_pc [K7]	Q5XKE5 [153-161]; Q7RTS7 [151-159]; P35908 [189-197]; P02538 [174-182]; P05787 [102-110]; P13647 [179-187]	0.982	49.343	157	1340.71
[R].KDGVPIGYK.[G]	1xKpyri_pc [K1]	O43447 [53-61]	1.009	2.369	10	1234.66
[R].EEKQKPQAER.[K]	1xKpyri_pc [K]	P26641 [239-248]	1.005	45.245	18	1500.76
[K].KDDTDDEIAK.[Y]	1xKpyri_pc [K1]	P27824 [90-99]	0.95	3.271	18	1407.64
[R].KDDEVQVVR.[G]	1xKpyri_pc [K1]	P61254 [51-59]; Q9UNX3 [51-59]	3.416	76.463	24	1345.69
[R].KDAEAWFTSR.[T]	1xKpyri_pc [K1]	P08727 [265-274]	1.117	41.166	17	1468.7
[R].EESGKPGAHVTVK.[K]	1xKpyri_pc [K5]	P22626 [100-112]	0.93	0.2	34	1596.81
[R].KCLEELQKR.[F]	1xCarbamidomethyl [C2]; 1xKpyri_pc [K1]	P49721 [162-170]	0.963	0.05	53	1461.76
[R].KCLEELQK.[R]	1xCarbamidomethyl [C2]; 1xKpyri_pc [K1]	P49721 [162-169]	1.031	10.758	46	1305.66
[K].KCAADLGLNK.[G]	1xCarbamidomethyl [C2]; 1xKpyri_pc [K1]	P49773 [83-92]	1.019	0.747	16	1347.68
[K].EFEGKTLVSVTK.[E]	1xKpyri_pc [K5]	P07900 [535-546]	1.141	5.061	44	1595.84
[K].EGHLSPDIVAEQKK.[L]	1xKpyri_pc [K]	P15559 [78-91]	1.022	3.378	13	1808.93
[R].EGQEDQGLTKDYGNSPLHR.[F]	1xKpyri_pc [K10]	P26599 [445-463]	0.356	0.469	7	2402.11
[K].KAVAFSPVTELKK.[D]	1xKpyri_pc [K1]	P17858 [715-727]	0.885	0.208	49	1675.95
[K].KAVAFSPVTELK.[K]	1xKpyri_pc [K1]	P17858 [715-726]	1.181	0.821	35	1547.86
[K].KATVNLLGEEK.[K]	1xKpyri_pc [K1]	Q00765 [176-186]	0.956	3.449	8	1459.79
[K].KATGAATPK.[K]	1xKpyri_pc [K1]	P10412 [140-148]	0.705	14.633	4	1102.6
[R].EHTALLKIEGVYAR.[D]	1xKpyri_pc [K7]	P18077 [23-36]	0.847	7.919	40	1858
[K].EKDEKIAWALSR.[K]	1xKpyri_pc [K5]	Q04760 [84-95]	0.552	31.005	8	1703.89
[R].KASDVHEVR.[K]	1xKpyri_pc [K1]	P14618 [247-255]	1.061	3.11	3	1298.66
[R].EIAQDFKTDLR.[F]	1xKpyri_pc [K7]	P68431 [74-84]	1.165	6.159	48	1593.8
[R].KAQCPIVER.[L]	1xCarbamidomethyl [C4]; 1xKpyri_pc [K1]	P46782 [63-71]	0.907	1.411	44	1358.7
[K].EIEELKQELIQAEIQNGVK.[Q]	1xKpyri_pc [K6]	Q12904 [58-76]	0.643	0.726	7	2469.3
[K].EIKDILIQYDR.[T]	1xKpyri_pc [K3]	P62249 [107-117]	1.171	1.853	23	1663.88
[R].ELKVGIPVTDENGNR.[L]	1xKpyri_pc [K3]	Q9H9B4 [200-214]	0.908	0.593	24	1898.97
[R].ELISNASDALDKIR.[LY]	1xKpyri_pc [K12]	P14625 [103-116]; P08238 [42-55]	1.024	1.7	33	1802.94
[K].KAIQESNDTNK.[G]	1xKpyri_pc [K1]	Q8TCD1 [39-49]	1.022	2.123	2	1505.73
[R].ELISNSSDALDKIR.[Y]	1xKpyri_pc [K12]	P07900 [47-60]	0.854	5.294	43	1818.93
[R].ELLTLDEKDPR.[R]	1xKpyri_pc [K8]	P46781 [59-69]	1.865	17.184	11	1586.82
[R].ELNITAAKEIEVGGGR.[K]	1xKpyri_pc [K8]	P62081 [42-57]	0.792	4.281	36	1915
[K].EDSSSTEFVEKR.[R]	1xKpyri_pc [K11]	O60749 [224-235]	1.125	2.992	20	1671.76
[R].KALDIAENEMPGLMR.[M]	1xOxidation [M]; 1xKpyri_pc [K1]	P23526 [20-34]	0.916	0.762	12	1961.96
[K].KDISENKR.[A]	1xKpyri_pc [K1]	P11142 [251-258]	0.928	6.116	19	1247.65
[R].KDSETGENIR.[Q]	1xKpyri_pc [K1]	P38646 [625-634]	0.874	2.586	22	1406.67
[R].KEGGLGPLNIPLLADVTR.[R]	1xKpyri_pc [K1]	P32119 [92-109]	1.274	8.419	12	2121.18
[R].DKLNNLVLFDK.[A]	1xKpyri_pc [K2]	P62851 [42-52]	1.022	1.515	8	1576.85
[K].DKVQAGDVITIDKATGK.[I]	1xKpyri_pc [K13]	Q9Y230 [185-201]	0.795	0.618	10	2017.07
[K].DLAGSIIGKGGQR.[I]	1xKpyri_pc [K9]	P61978 [397-409]	0.993	1.654	20	1529.82
[R].DLDLKKPIYQR.[T]	1xKpyri_pc [K5]	P31153 [363-373]	0.853	0.588	17	1646.9
[K].KEELTLEGIR.[Q]	1xKpyri_pc [K1]	P60842 [238-247]	0.954	2.289	97	1445.77
[K].DLEKWQNNLLPSR.[Q]	1xKpyri_pc [K4]	P62244 [85-97]	0.855	2.734	14	1870.96
[R].DIKDTTVGTLSQR.[I]	1xKpyri_pc [K3]	P51665 [178-190]	1.073	1.464	39	1691.87
[R].DLQQYQSQAKQLFR.[K]	1xKpyri_pc [K10]	O75396 [29-42]	1.225	0.92	9	2011.01
[K].DISLSDYKGK.[Y]	1xKpyri_pc [K]	Q06830 [28-37]	1.06	16.46	45	1383.69
[R].DNKQAGVFEPTIVK.[V]	1xKpyri_pc [K3]	P17987 [497-510]	1.065	1.328	9	1803.94
[R].DNIQGITKPAIR.[R]	1xKpyri_pc [K8]	P62805 [25-36]	0.932	12.561	37	1583.87
[R].DQALKALR.[A]	1xKpyri_pc [K5]	P45974 [739-746]	1.041	0.789	18	1172.65
[R].DSCPLDCKVYVGNLGNNGNKTELER.[A]	2xCarbamidomethyl [C3; C7]; 1xKpyri_pc [K8]	P84103 [4-28]	1.285	1.24	9	3110.44
[R].DSQTQAILTKLK.[C]	1xKpyri_pc [K10]	Q13098 [239-250]	0.882	0.869	2	1603.88
[K].DSYVGDEAQSKR.[G]	1xKpyri_pc [K11]	P60709 [51-62]; P68133 [53-64]; P63261 [51-62]	0.995	2.382	41	1612.74
[K].DVDEAYMNKVELESR.[L]	1xKpyri_pc [K9]	P05787 [199-213]	1.106	40.839	15	2055.94
[K].DVNAAIATIKTK.[R]	1xKpyri_pc [K10]	Q71U36 [327-338]; P68363 [327-338]; Q9BQE3 [327-338]	0.989	3.763	99	1502.83
[R].KEAAENSLVAYK.[A]	1xKpyri_pc [K1]	P62258 [142-153]	1.058	7.209	16	1580.81
[K].DYHFKVDNDENEHQLSLR.[T]	1xKpyri_pc [K5]	P06748 [28-45]	0.863	3.249	3	2517.15
[K].KDWLFAPHYR.[Y]	1xKpyri_pc [K1]	Q15008 [284-293]	0.733	7.488	13	1590.8
[K].EAIEGTYIDKK.[C]	1xKpyri_pc [K10]	P62280 [49-59]	1.004	3.536	21	1524.77
[K].KDVLETFTVK.[S]	1xKpyri_pc [K1]	P21926 [170-179]	1.153	1.699	31	1437.77
[K].KDVDEAYMNKVELESR.[L]	1xKpyri_pc [K]	P05787 [198-213]	0.85	2.874	12	2184.04
[K].KDVDEAYMNK.[V]	1xOxidation [M8]; 1xKpyri_pc [K1]	P05787 [198-207]	1.031	25.238	15	1486.66
[R].EALLSSAVDHGSDEVKFR.[Q]	1xKpyri_pc [K16]	P78371 [139-156]	0.959	0.66	6	2218.09
[K].EASKQADVNLVNAK.[L]	1xKpyri_pc [K4]	O43175 [381-394]	1.045	1.727	8	1744.9
[R].EASIDILHSIVKR.[D]	1xKpyri_pc [K12]	O00231 [21-33]	1.539	1.146	10	1738.96
[R].EDQDKVAVLSQNR.[T]	1xKpyri_pc [K5]	Q9BWD1 [176-188]	1.125	2.033	49	1759.87
[R].KDLYANTVLSGGTTMYPGIADR.[M]	1xKpyri_pc [K1]	P60709 [291-312]; P63261 [291-312]	0.952	5.026	24	2601.28
[R].KALDIAENEMPGLMR.[M]	1xKpyri_pc [K1]	P23526 [20-34]	0.867	0.606	14	1945.96
[K].KALAAGGYDVEK.[N]	1xKpyri_pc [K1]	P16401 [67-78]	0.78	9.155	10	1479.76
[K].KALAAAGYDVEK.[N]	1xKpyri_pc [K1]	P10412 [64-75]; P16403 [64-75]	1.151	7.816	11	1493.77
[K].HELQANCYEEVKDR.[C]	1xCarbamidomethyl [C7]; 1xKpyri_pc [K12]	P23528 [133-146]	1.05	0.146	36	2048.92
[K].FLDASGAKLDYR.[R]	1xKpyri_pc [K8]	Q7L1Q6 [53-64]	1.094	15.366	5	1613.81
[R].FLEQQNKMLETK.[W]	1xKpyri_pc [K7]	P05787 [111-122]	1.062	12.752	40	1766.89
[K].FLIPNASQAESKVFYLK.[M]	1xKpyri_pc [K12]	P63104 [104-120]	0.635	1.272	8	2213.18
[K].FINYVKNCFR.[M]	1xCarbamidomethyl [C8]; 1xKpyri_pc [K6]	P06748 [268-277]	0.927	0.297	24	1618.79
[R].FNVLKVTK.[A]	1xKpyri_pc [K5]	P62280 [140-147]	0.959	3.143	23	1206.7
[K].FNVWDTAGQEKFGGLR.[D]	1xKpyri_pc [K11]	P62826 [61-76]	0.329	0.407	4	2083.01
[K].FSAYIKNSNPALNDNLEK.[G]	1xKpyri_pc [K6]	O00299 [114-131]	0.881	3.684	34	2296.14
[R].FVTGNKILR.[I]	1xKpyri_pc [K6]	P62277 [65-73]	1.375	16.521	13	1305.74
[K].GVFTKELPSGK.[K]	1xKpyri_pc [K5]	P30041 [205-215]	1.24	18.531	57	1420.76
[K].GTLVQTKGTGASGSFK.[L]	1xKpyri_pc [K7]	P16401 [94-109]; P10412 [91-106]; P16403 [91-106]	1.018	1.152	21	1796.93
[K].FYEAFSKNLK.[L]	1xKpyri_pc [K7]	P08238 [429-438]	0.974	2.559	57	1504.76
[K].FYEQFSKNIK.[L]	1xKpyri_pc [K7]	P07900 [437-446]	0.94	3.294	88	1561.78
[R].GAKAEEILEK.[G]	1xKpyri_pc [K3]	P62913 [76-85]	0.984	2.322	19	1345.71
[R].GAPLAKVVFR.[D]	1xKpyri_pc [K6]	P62917 [55-64]	0.994	0.723	6	1315.76
[K].GCEVVVSGKLR.[G]	1xCarbamidomethyl [C2]; 1xKpyri_pc [K9]	P23396 [133-143]	0.811	0.729	11	1461.76
[R].GDGTGGKSIYGER.[F]	1xKpyri_pc [K7]	P23284 [110-122]	1.148	53.057	10	1554.73
[R].GQKVLDSGAPIKIPVGPETLGR.[I]	1xKpyri_pc [K3]	P06576 [122-143]	0.816	0.555	2	2490.38
[R].GPTEADELMKR.[V]	1xKpyri_pc [K10]	P11413 [488-498]	1.033	1.202	11	1504.72
[K].GPSSVEDIKAK.[M]	1xKpyri_pc [K9]	P06748 [240-250]	1.086	0.91	58	1388.72
[R].GPIKFNVWDTAGQEK.[F]	1xKpyri_pc [K4]	P62826 [57-71]	0.952	0.719	17	1947.97
[K].GIVKDIIHDPGR.[G]	1xKpyri_pc [K4]	P62917 [43-54]	2.099	0.949	49	1577.85
[R].GDVVPKDVNAAIATIK.[T]	1xKpyri_pc [K6]	Q71U36 [321-336]; P68363 [321-336]; Q9BQE3 [321-336]	0.732	2.573	36	1869.02
[R].GELAIKDANAK.[L]	1xKpyri_pc [K6]	P05787 [342-352]	0.748	18.756	25	1387.73
[R].GGPNIITLADIVKDPVSR.[T]	1xKpyri_pc [K13]	P68400 [90-107]	0.753	0.719	10	2123.16
[R].GHLENNPALEKLLPHIR.[G]	1xKpyri_pc [K11]	P05388 [67-83]	0.944	1.807	42	2209.2
[K].GILAADESTGSIAKR.[L]	1xKpyri_pc [K14]	P04075 [29-43]	1.109	0.422	47	1746.91
[R].GKLDGNQDLIR.[F]	1xKpyri_pc [K2]	P48735 [383-393]	0.939	1.206	21	1486.78
[K].GIEKNLGIGK.[V]	1xKpyri_pc [K4]	P40926 [298-307]	1.05	0.835	31	1286.72
[R].HESGASIKIDEPLEGSEDR.[I]	1xKpyri_pc [K8]	P61978 [415-433]	1.115	13.369	18	2327.09
[K].FKLITEDVQGK.[N]	1xKpyri_pc [K2]	P61247 [84-94]	0.981	4.56	75	1535.82
[R].FKAADLNGDLTATR.[E]	1xKpyri_pc [K2]	Q15293 [175-188]	1.144	3.374	4	1750.89
[R].FGTKGLAITFVSDENDAK.[I]	1xKpyri_pc [K4]	O00148 [380-397]; Q13838 [381-398]	0.853	0.266	3	2171.08
[R].KAGNFYVPAEPK.[L]	1xKpyri_pc [K1]	P18124 [77-88]	1.042	4.92	19	1578.81
[R].ELNITAAKEIEVGGGRK.[A]	1xKpyri_pc [K8]	P62081 [42-58]	0.882	0.363	36	2043.1
[K].ELQAAGKSPEDLER.[L]	1xKpyri_pc [K7]	P06744 [448-461]	1.439	3.595	34	1800.89
[K].KAFSGYLGTDQSK.[W]	1xKpyri_pc [K1]	P10768 [186-198]	0.973	2.865	16	1659.81
[R].EISLLKELR.[H]	1xKpyri_pc [K6]	P06493 [51-59]	1.016	1.708	15	1358.78
[K].EITALAPSTMKIK.[I]	1xKpyri_pc [K]	P60709 [316-328]; P68133 [318-330]; P63261 [316-328]	1.032	4.327	46	1660.91
[K].EITALAPSTMKIK.[I]	1xOxidation [M10]; 1xKpyri_pc [K11]	P60709 [316-328]; P68133 [318-330]; P63261 [316-328]	0.923	9.93	24	1676.9
[K].KAEAGAGSATEFQFR.[G]	1xKpyri_pc [K1]	P46783 [139-153]	0.972	6.899	18	1827.88
[R].ELTAVVQKR.[F]	1xKpyri_pc [K8]	P23396 [68-76]	1.158	15.365	57	1301.73
[K].ENLKAAQEEYVK.[R]	1xKpyri_pc [K4]	P04075 [319-330]	1.075	5.766	11	1679.84
[K].ENLKAAQEEYVKR.[A]	1xKpyri_pc [K4]	P04075 [319-331]	1.593	0.374	22	1835.94
[R].KADIDLTKR.[A]	1xKpyri_pc [K]	P62269 [47-55]	1.106	3.424	51	1317.73
[R].ERHPGSFDVVHVKDANGNSFATR.[L]	1xKpyri_pc [K13]	P62701 [199-221]	0.844	3.951	49	2798.35
[R].KADIDLTK.[R]	1xKpyri_pc [K1]	P62269 [47-54]	1.182	11.893	62	1161.63
[R].DKILGATIENSR.[I]	1xKpyri_pc [K2]	P08727 [139-150]	1.066	14.561	19	1574.83
[K].EVPNYKLITPAVVSER.[L]	1xKpyri_pc [K6]	P62851 [61-76]	1.183	2.385	45	2073.11
[K].EYHLAINKEPNSLHGGVR.[G]	1xKpyri_pc [K8]	Q96C23 [94-111]	0.967	0.525	28	2292.16
[K].FAAKGEGQLGPAER.[A]	1xKpyri_pc [K4]	P13639 [236-249]	0.72	0.207	29	1688.85
[K].FAVEEIIQKQVK.[V]	1xKpyri_pc [K9]	Q9BS40 [56-67]	1.035	0.591	21	1689.93
[R].KAAALEFLNR.[F]	1xKpyri_pc [K1]	P31948 [78-87]	0.866	10.949	4	1390.76
[R].FDVQLKDLEK.[W]	1xKpyri_pc [K6]	P62244 [79-88]	1.162	63.322	8	1492.78
[R].HYGGLTGLNKAETAAK.[H]	1xKpyri_pc [K10]	P18669 [91-106]	1.062	1.182	35	1888.97
[R].HQGVMVGMGQKDSYVGDEAQSK.[R]	1xKpyri_pc [K11]	P60709 [40-61]; P68133 [42-63]; P63261 [40-61]	1.063	16.638	11	2609.19
[R].HNGTGGKSIYGEKFEDENFILK.[H]	1xKpyri_pc [K]	P62937 [70-91]	0.891	0.306	43	2741.33
[R].HLYTKDIDIHEVR.[I]	1xKpyri_pc [K5]	Q00839 [348-360]	1.173	3.469	44	1896.97
[K].FEKEAAEMGK.[G]	1xKpyri_pc [K3]	Q05639 [42-51]; P68104 [42-51]	0.877	8.71	42	1397.65
[K].HKGPPVFTQEER.[Y]	1xKpyri_pc [K2]	Q99447 [65-76]	0.969	0.504	13	1682.84
[R].FGEVVDCTIKTDPVTGR.[S]	1xCarbamidomethyl [C7]; 1xKpyri_pc [K10]	O14979 [171-187]	0.971	0.225	25	2152.05
[R].FGFPEGSVELYAEKVATR.[G]	1xKpyri_pc [K14]	P23396 [77-94]	0.642	4.18	9	2258.12
[K].HKELAPYDENWFYTR.[A]	1xKpyri_pc [K2]	P39019 [42-56]	2.02	16.89	15	2227.04
[R].EVQTNDLKEVVNK.[L]	1xKpyri_pc [K8]	P61247 [175-187]	0.938	3.366	9	1773.91
[K].DKDFAIDIIK.[S]	1xKpyri_pc [K2]	Q15181 [212-221]	0.795	2.365	2	1435.76
[K].DTGKTPVEPEVAIHR.[I]	1xKpyri_pc [K4]	P60866 [5-19]	1.05	2.139	8	1906.98
[R].AITGASLADIMAKR.[N]	1xKpyri_pc [K13]	P83731 [81-94]	0.877	2.719	11	1675.89
[K].KGESQTDIEITR.[E]	1xKpyri_pc [K1]	P49368 [249-260]	0.975	2.65	12	1634.81
[R].KGESGQSWPR.[L]	1xKpyri_pc [K1]	Q15185 [79-88]	0.89	6.667	14	1389.67
[K].KGEKDIPGLTDTTVPR.[R]	1xKpyri_pc [K]	P62753 [116-131]	0.969	1.096	30	1985.05
[K].KGDSSAEELK.[L]	1xKpyri_pc [K1]	P26373 [136-145]	0.916	6.545	43	1321.64
[K].KGDIVDIK.[G]	1xKpyri_pc [K1]	P46778 [36-43]	0.916	3.743	90	1145.63
[R].AHSIQIMKVEEIAASK.[C]	1xKpyri_pc [K8]	Q02543 [121-136]	2.229	1.636	17	2013.06
[K].AKDANNGNLQLR.[N]	1xKpyri_pc [K2]	P05455 [286-297]	1.062	1.937	14	1571.8
[R].AKEAAEQDVEK.[K]	1xKpyri_pc [K2]	P26373 [199-209]	1.238	4.59	35	1475.71
[K].AKETADAITK.[E]	1xKpyri_pc [K2]	Q00765 [163-172]	1.05	1.647	22	1305.68
[K].AKLAEQAER.[Y]	1xKpyri_pc [K2]	P63104 [10-18]; P31947 [10-18]; P31946 [12-20]; P27348 [10-18]	0.808	5.015	41	1273.66
[K].AKLAIWDTAGQER.[F]	1xKpyri_pc [K2]	Q9NP72 [57-69]	0.425	2.85	10	1716.88
[R].AKTNADTDGMVK.[I]	1xKpyri_pc [K2]	P09622 [429-440]	1.098	1.264	10	1508.72
[K].ALAAAGYDVEKNNSR.[I]	1xKpyri_pc [K11]	P10412 [65-79]; P16403 [65-79]	1.185	2.446	10	1836.9
[R].ALDEATKYALER.[K]	1xKpyri_pc [K7]	P11310 [295-306]	0.941	0.335	31	1637.83
[K].KGESQTDIEITREEDFTR.[I]	1xKpyri_pc [K1]	P49368 [249-266]	0.948	1.035	4	2412.14
[R].ALDKLDGTEINGR.[N]	1xKpyri_pc [K4]	Q13247 [162-174]	0.989	0.949	16	1659.84
[K].AIKLAANDFFR.[RH]	1xKpyri_pc [K3]	Q9H1K4 [80-90]	0.891	0.202	12	1523.81
[R].KFVADGIFK.[A]	1xKpyri_pc [K1]	P23396 [10-18]	1.178	9.816	33	1282.69
[R].ALKMIVDPVEPHGEMK.[F]	1xKpyri_pc [K3]	Q13263 [375-390]	1.141	0.421	19	2052.04
[R].ALSTGEKGFGYK.[G]	1xKpyri_pc [K7]	P62937 [38-49]	1.004	3.432	35	1515.76
[R].KEGTGSTATSSSSTAGAAGK.[G]	1xKpyri_pc [K1]	O15372 [5-24]	1.166	2.485	4	2013.95
[R].AMELLKVSK.[D]	1xKpyri_pc [K6]	Q9Y3U8 [57-65]	1.019	2.631	24	1276.71
[K].ANPFGGASHAKGIVLEK.[V]	1xKpyri_pc [K11]	P62266 [38-54]	1.086	1.986	13	1954.03
[R].KFNALFAQGNYSEAAK.[V]	1xKpyri_pc [K1]	Q00610 [367-382]	0.969	1.329	28	2016.99
[R].ANTFVAELKGLDPAR.[V]	1xKpyri_pc [K9]	P40926 [177-191]	0.966	0.565	23	1859.98
[K].APQAAGKIHTDFEK.[G]	1xKpyri_pc [K7]	Q9NTK5 [327-340]	1.445	0.824	15	1770.89
[R].APQCLGKFIEIAAR.[K]	1xCarbamidomethyl [C4]; 1xKpyri_pc [K7]	Q00839 [559-572]	0.876	0.162	13	1831.96
[R].AQLGGPEAAKSDETAAK.[-]	1xKpyri_pc [K10]	P04792 [189-205]	0.919	5.088	61	1901.94
[R].ASEEHLKQHYIDLK.[D]	1xKpyri_pc [K7]	P22392 [43-56]	1.1	0.046	14	1968.99
[R].KFLDGIYVSEK.[G]	1xKpyri_pc [K1]	P32969 [174-184]	0.895	3.006	62	1556.81
[R].ALEAANGELEVKIR.[D]	1xKpyri_pc [K12]	P08727 [100-113]	0.762	12.566	13	1770.95
[R].AGVNTVTTLVENKK.[A]	1xKpyri_pc [K13]	P62424 [138-151]	0.959	1.937	14	1731.94
[R].KGHAVGDIPGVR.[F]	1xKpyri_pc [K1]	P62266 [108-119]	1.129	74.952	77	1463.79
[R].AGKVEAQHILASAPTDR.[N]	1xKpyri_pc [K3]	Q53H96 [30-46]	2.076	2.218	15	2022.05
[K].AADKLIQNLDANHDGR.[I]	1xKpyri_pc [K4]	Q96FQ6 [58-73]	0.926	0.93	4	2008.99
[K].KHPDSSVNFAEFSK.[K]	1xKpyri_pc [K1]	P26583 [30-43]	1.043	2.022	23	1850.88
[R].AAKLAPEFAK.[R]	1xKpyri_pc [K3]	P30041 [54-63]	2.035	61.625	27	1303.72
[R].AALDKATVLLSMSK.[G]	1xKpyri_pc [K5]	Q53EL6 [293-306]	1.125	0.382	4	1705.93
[K].KHPDASVNFSEFSKK.[C]	1xKpyri_pc [K1]	P09429 [30-44]	1.006	0.397	12	1978.98
[K].KHPDASVNFSEFSK.[K]	1xKpyri_pc [K]	P09429 [30-43]	1.201	5.743	78	1850.88
[R].AAINQKLIETGER.[E]	1xKpyri_pc [K6]	Q9NPA8 [14-26]	1.124	13.261	27	1700.91
[K].KHLEINPDHSIIETLR.[Q]	1xKpyri_pc [K1]	P07900 [632-647]	1.157	4.536	59	2173.15
[K].KHLEINPDHPIVETLR.[Q]	1xKpyri_pc [K1]	P08238 [624-639]	1.613	5.595	150	2169.16
[R].AALQELLSKGLIK.[L]	1xKpyri_pc [K9]	P62851 [86-98]	0.942	1.556	13	1641.97
[K].KHEEEEAKAER.[E]	1xKpyri_pc [K1]	P25789 [239-249]	1.007	2.282	2	1613.77
[K].AAIVEKLSSLPFQK.[I]	1xKpyri_pc [K6]	P61970 [50-63]	0.965	1.016	14	1789
[K].AAQASDLEKIHLDEK.[S]	1xKpyri_pc [K9]	P37837 [278-292]	0.958	0.366	15	1925.97
[K].ADDGRPFPQVIKSK.[G]	1xKpyri_pc [K12]	P04075 [88-101]	0.989	0.858	16	1815.95
[R].ADGKISEQSDAK.[L]	1xKpyri_pc [K4]	P25705 [528-539]	0.877	1.748	22	1506.72
[K].ADKDYHFKVDNDENEHQLSLR.[T]	1xKpyri_pc [K]	P06748 [25-45]	0.927	0.106	62	2831.31
[K].ADLINNLGTIAKSGTK.[A]	1xKpyri_pc [K12]	P07900 [101-116]; P08238 [96-111]	1.068	3.445	38	1874.01
[K].KGLDPYNVLAPK.[G]	1xKpyri_pc [K1]	P10606 [57-68]	0.904	1.83	56	1572.85
[R].AGKIVVNLTGR.[L]	1xKpyri_pc [K3]	P62244 [58-68]	1.152	18.544	52	1385.8
[K].AGKITDEEATK.[S]	1xKpyri_pc [K3]	P08237 [142-152]	0.889	0.526	21	1420.71
[R].KGINTLVTYDMVPEPK.[I]	1xKpyri_pc [K1]	P20674 [72-87]	1.108	0.977	20	2063.06
[K].KGLTPSQIGVILR.[D]	1xKpyri_pc [K1]	P62277 [43-55]	1.03	4.053	67	1639.96
[K].AFNQGKIFK.[-]	1xKpyri_pc [K6]	P26641 [429-437]	0.89	1.086	22	1310.7
[K].ASHGYGGKFGVEQDR.[M]	1xKpyri_pc [K8]	Q14247 [80-94]	0.964	5.125	10	1865.87
[K].AETAAKHGEAQVK.[I]	1xKpyri_pc [K6]	P18669 [101-113]	1.109	0.417	50	1597.81
[R].KGNYAER.[VI]	1xKpyri_pc [K1]	Q16777 [37-43]	1.023	15.523	91	1095.53
[K].KGQSEEIQK.[K]	1xKpyri_pc [K1]	P83731 [61-69]	0.862	6.147	24	1304.66
[K].AEEILEKGLK.[V]	1xKpyri_pc [K7]	P62913 [79-88]	0.961	1.978	16	1387.76
[K].ADVVPKTAENFR.[A]	1xKpyri_pc [K6]	P30405 [68-79]	1.037	1.168	19	1604.82
[R].KGVAINMVTEEDKR.[T]	1xKpyri_pc [K1]	P60842 [369-382]	1.021	1.022	35	1847.94
[K].ADINTKWAATR.[W]	1xKpyri_pc [K6]	P50914 [80-90]	1.751	5.098	24	1504.77
[K].AELEIQKDALEPGQR.[V]	1xKpyri_pc [K7]	P07741 [108-122]	0.806	1.817	16	1955
[K].ATAVVDGAFKEVK.[L]	1xKpyri_pc [K]	P32119 [17-29]	0.975	3.031	27	1592.84
[K].GKVEEVELPVEK.[V]	1xKpyri_pc [K2]	Q99873 [144-155]	1.064	1.939	8	1613.85
[R].CKELGITALHIK.[L]	1xCarbamidomethyl [C1]; 1xKpyri_pc [K2]	P62263 [85-96]	1.216	0.104	40	1640.89
[K].KELSDIAHR.[I]	1xKpyri_pc [K1]	P04075 [14-22]	1.03	0.609	36	1326.69
[K].CDVDIRKDLYANTVLSGGTTMYPGIADR.[M]	1xCarbamidomethyl [C1]; 1xKpyri_pc [K7]	P60709 [285-312]; P63261 [285-312]	0.776	16.243	7	3359.61
[K].KFAEAFEAIPR.[A]	1xKpyri_pc [K1]	P50990 [440-450]	0.833	1.064	13	1536.8
[K].AVGKVIPELNGK.[L]	1xKpyri_pc [K4]	P04406 [216-227]	1.045	13.892	19	1482.84
[K].DGKYSQVLANGLDNK.[L]	1xKpyri_pc [K3]	P62269 [92-106]	0.879	2.545	13	1879.93
[R].DAVTYTEHAKR.[K]	1xKpyri_pc [K10]	P62805 [69-79]	0.935	2.147	32	1548.76
[K].DFLAGGVAAAISKTAVAPIER.[V]	1xKpyri_pc [K13]	P05141 [11-31]	0.754	0.741	8	2315.25
[R].DDGYSTKDSYSSR.[D]	1xKpyri_pc [K7]	P38159 [211-223]	1.114	2.173	10	1738.73
[K].AVLFCLSEDKK.[N]	1xCarbamidomethyl [C5]; 1xKpyri_pc [K10]	P23528 [35-45]	0.91	0.286	14	1567.79
[R].DETEFYLGKR.[C]	1xKpyri_pc [K9]	P18077 [37-46]	1.212	6.18	7	1515.72
[R].DEGGKAFFK.[G]	1xKpyri_pc [K5]	P12236 [264-272]; P05141 [264-272]	0.894	0.405	20	1256.61
[K].KEMQPTHPIR.[L]	1xKpyri_pc [K1]	P63104 [158-167]; P31946 [160-169]; P27348 [158-167]	0.877	2.85	50	1494.76
[K].AYHEQLSVAEITNACFEPANQMVK.[C]	1xCarbamidomethyl [C15]; 1xKpyri_pc [K24]	Q71U36 [281-304]; P68363 [281-304]	0.783	0.244	19	3008.4
[K].AYHEQLTVAEITNACFEPANQMVK.[C]	1xCarbamidomethyl [C15]; 1xKpyri_pc [K24]	Q9BQE3 [281-304]	1.24	2.385	2	3022.42
[K].KEMQPTHPIR.[L]	1xOxidation [M3]; 1xKpyri_pc [K1]	P63104 [158-167]; P31946 [160-169]; P27348 [158-167]	1.267	5.767	12	1510.76
[K].DGVKFSASGELGNGNIK.[L]	1xKpyri_pc [K4]	P12004 [165-181]	0.937	0.555	8	1950.97
[R].AVDDGVNTFKVLTR.[D]	1xKpyri_pc [K10]	P50990 [391-404]	1.054	1.095	54	1792.93
[K].AVDSQILPKIK.[A]	1xKpyri_pc [K9]	Q02878 [252-262]	1.439	5.391	17	1469.85
[K].DGVVEITGKHEER.[Q]	1xKpyri_pc [K9]	P04792 [115-127]	1.108	1.072	60	1726.85
[K].ATGDETGAKVER.[A]	1xKpyri_pc [K9]	P61247 [241-252]	1.339	4.019	25	1491.72
[RK].DHCVAHKLFNNLK.[-]	1xCarbamidomethyl [C3]; 1xKpyri_pc [K7]	P07919 [79-91]	1.026	0.509	27	1853.92
[K].KFGDMSYSIR.[H]	1xKpyri_pc [K1]	Q16890 [124-133]	0.982	1.618	11	1461.69
[K].DHASIQMNVAEVDKVTGR.[F]	1xOxidation [M7]; 1xKpyri_pc [K14]	P63220 [28-45]	2.94	5.805	5	2244.08
[R].KESYSIYVYK.[V]	1xKpyri_pc [K1]	Q16778 [35-44]	1.09	6.576	9	1537.77
[K].DHASIQMNVAEVDKVTGR.[F]	1xKpyri_pc [K14]	P63220 [28-45]	0.395	10.367	6	2228.09
[K].DGVVEITGKHEERQDEHGYISR.[C]	1xKpyri_pc [K9]	P04792 [115-136]	1.365	0.021	34	2812.34
[R].KELQAAGKSPEDLER.[L]	1xKpyri_pc [K]	P06744 [447-461]	0.825	1.06	14	1928.98
[R].KELSANTAAFAK.[S]	1xKpyri_pc [K1]	O60749 [335-346]	1.075	1.684	22	1508.79
[K].KEVQDEEK.[N]	1xKpyri_pc [K1]	P15559 [241-248]	0.956	4.728	35	1262.6
[K].DAASVEKVLDQK.[E]	1xKpyri_pc [K7]	Q99729 [119-130]	0.923	0.398	11	1560.8
[R].ATPEQYQILKENYGQK.[E]	1xKpyri_pc [K10]	P14324 [344-359]	1.125	2.314	4	2168.08
[R].KESYSVYVYK.[V]	1xKpyri_pc [K1]	Q5QNW6 [35-44]; P58876 [35-44]	1.174	17.548	35	1523.75
[K].ATVPKTEIR.[E]	1xKpyri_pc [K5]	P62847 [33-41]	0.96	2.867	60	1272.71
[K].DASPNQVAEKVASR.[I]	1xKpyri_pc [K10]	O43402 [101-114]	0.864	0.421	25	1729.86
[K].KSDPVVSYR.[E]	1xKpyri_pc [K1]	P13639 [572-580]	1.342	3.652	26	1308.67
[K].KIFEYETQR.[R]	1xKpyri_pc [K1]	P50402 [37-45]	0.887	5.309	11	1471.73
[R].FKTITTAYYR.[G]	1xKpyri_pc [K2]	P51153 [70-79]	0.817	15.488	4	1521.78
[K].LSPKAATLAER.[S]	1xKpyri_pc [K4]	P50454 [36-46]	0.873	0.069	5	1414.78
[R].CKHFELGGDKK.[R]	1xCarbamidomethyl [C1]; 1xKpyri_pc [K2]	Q969Q0 [88-98]; P83881 [88-98]	1.144	0.931	12	1576.77
[K].KYDYDSSSVR.[K]	1xKpyri_pc [K1]	Q96TA1 [479-488]	0.921	1.8	26	1477.67
[K].KTFEINPR.[H]	1xKpyri_pc [K1]	P14625 [683-690]	0.981	4.284	20	1262.66
[R].KSSTPEEVKK.[R]	1xKpyri_pc [K1]	P23528 [22-31]	0.834	12.269	1	1390.73
[K].DFKENNVVFNR.[F]	1xKpyri_pc [K3]	O43615 [247-257]	1.23	2.123	3	1639.8
[-].MAGEKVEKPDTK.[E]	1xMet-loss [N-Term]; 1xKpyri_pc [K5]	Q02878 [1-12]	1.017	0.606	28	1459.75
[K].SKPGAAMVEMADGYAVDR.[A]	1xKpyri_pc [K2]	P14866 [417-434]	1.766	0.528	5	2125.98
[-].MAAVKTLNPK.[A]	1xMet-loss+Acetyl [N-Term]; 1xKpyri_pc [K5]	P40227 [1-10]	0.914	0.679	37	1241.7
[-].MAAQSAPKVVLK.[S]	1xMet-loss+Acetyl [N-Term]; 1xKpyri_pc [K8]	Q9Y3Y2 [1-12]	0.996	6.622	9	1411.81
[R].KVLIIGGGDGGVLR.[E]	1xKpyri_pc [K1]	P19623 [96-109]	0.792	7.196	3	1611.93
[K].GNKPWISLPR.[G]	1xKpyri_pc [K3]	P62701 [231-240]	0.987	2.385	28	1425.78
[K].IYVDDGLISLQVKQK.[G]	1xKpyri_pc [K13]	P14618 [174-188]	1.004	0.348	6	1977.08
[K].YLKDVTLQK.[Q]	1xKpyri_pc [K3]	P18621 [47-55]	0.985	4.092	41	1365.75
[K].LYEQLSGK.[-]	1xKpyri_pc [K8]	P30086 [180-187]	0.858	7.231	7	1195.61
[R].LVNTSENLSKSR.[K]	1xKpyri_pc [K10]	Q9UEU0 [181-192]	1.299	8.82	2	1605.83
[K].GKDSLYAQGR.[R]	1xKpyri_pc [K2]	Q969Q0 [29-38]	1.194	10.579	3	1352.67
[R].FVKQDQVCIAR.[L]	1xCarbamidomethyl [C8]; 1xKpyri_pc [K3]	P15170 [446-456]	1.109	3.747	9	1621.83
[R].CKHFELGGDK.[K]	1xCarbamidomethyl [C1]; 1xKpyri_pc [K2]	Q969Q0 [88-97]; P83881 [88-97]	6.728	26.415	17	1448.67
[R].TIELDGKTIK.[L]	1xKpyri_pc [K7]	P62820 [52-61]; Q9H0U4 [49-58]	0.366	1.31	7	1375.76
[R].KLNEQSPTR.[C]	1xKpyri_pc [K1]	O75396 [43-51]	1.037	2.768	49	1330.69
[R].VETTVTSLKTK.[V]	1xKpyri_pc [K9]	Q16890 [154-164]	1.139	2.723	16	1464.81
[R].AMELLKVSK.[D]	1xOxidation [M2]; 1xKpyri_pc [K6]	Q9Y3U8 [57-65]	0.913	4.843	5	1292.7
[K].ALQEKVEIK.[Q]	1xKpyri_pc [K5]	P13010 [661-669]	1.068	1.608	19	1315.74
[R].LDHKFDLMYAKR.[A]	1xOxidation [M8]; 1xKpyri_pc [K11]	A6NHL2 [398-409]; Q71U36 [391-402]; P68363 [391-402]; Q9BQE3 [391-402]	1.218	50.785	3	1810.91
[K].ALELDSNNEKGLFR.[R]	1xKpyri_pc [K10]	Q02790 [345-358]	2.345	0.841	4	1863.93
[K].SCGKDGFHIR.[V]	1xCarbamidomethyl [C2]; 1xKpyri_pc [K4]	P27635 [79-88]	0.867	2.626	45	1434.67
[R].VISSIEQKTSADGNEK.[K]	1xKpyri_pc [K8]	P61981 [62-77]	0.822	5.176	9	1963.97
[R].IDDLIKLHPESK.[D]	1xKpyri_pc [K6]	P17987 [527-538]	1.101	0.361	22	1665.9
[K].SKLVDEEPQLTK.[R]	1xKpyri_pc [K2]	Q9UG63 [607-618]	0.859	7.332	3	1644.86
[K].NGDLDEVKDYVAK.[G]	1xKpyri_pc [K8]	P58546 [12-24]	1.06	1.381	2	1723.83
[K].AVKDATNTGIK.[C]	1xKpyri_pc [K3]	P50579 [279-289]	0.866	1.159	34	1375.73
[R].VDQSAVGFEYQGK.[T]	1xKpyri_pc [K13]	Q14247 [132-144]	1.037	14.133	2	1685.79
[R].MVVPAALKVVR.[L]	1xKpyri_pc [K8]	P40429 [118-128]	1.5	10.482	6	1440.85
[-].MVMEKPSPLLVGR.[E]	1xOxidation [M3]; 1xMet-loss [N-Term]; 1xKpyri_pc [K5]	Q13283 [1-13]; Q9UN86 [1-13]	0.205	8.136	14	1599.87
[K].VKVGVNGFGR.[I]	1xKpyri_pc [K2]	P04406 [4-13]	1.116	98.257	22	1290.71
[K].LKLEDFFAR.[N]	1xKpyri_pc [K2]	P11413 [96-104]	0.938	0.965	15	1396.74
[-].MSGSSSVAAMKK.[V]	1xMet-loss+Acetyl [N-Term]; 1xKpyri_pc [K11]	P63218 [1-12]	0.761	7.242	2	1352.66
[K].KFHTVSGSK.[C]	1xKpyri_pc [K1]	Q99729 [215-223]	1.012	5.286	8	1248.65
[K].ATDILPKWLR.[F]	1xKpyri_pc [K7]	Q12931 [376-385]	1.158	0.595	6	1470.82
[R].SGKKLEDGPK.[F]	1xKpyri_pc [K]	P68104 [383-392]	1.105	0.183	32	1316.7
[R].VTIMPKDIQLAR.[R]	1xKpyri_pc [K6]	P68431 [118-129]	0.735	23.232	10	1642.91
[K].VKIVACDGK.[N]	1xCarbamidomethyl [C6]; 1xKpyri_pc [K2]	P52657 [93-101]	1.17	4.968	1	1247.66
[R].KFDGVEGPR.[T]	1xKpyri_pc [K1]	Q6PKG0 [367-375]	1.013	2.283	8	1262.63
[K].QKSILYDER.[S]	1xKpyri_pc [K2]	P25787 [52-60]	1.148	6.68	8	1409.72
[R].EVVDGLEKAIYKGPGSEAGP.[-]	1xKpyri_pc [K8]	P21964 [252-271]	0.787	0.882	5	2274.14
[K].SESPKEPEQLR.[K]	1xKpyri_pc [K5]	P09651 [4-14]	0.938	4.298	8	1557.77
[K].EFDGKSLVSVTK.[E]	1xKpyri_pc [K5]	P08238 [527-538]	0.946	4.368	49	1567.81
[-].MPLAKDLLHPSPEEEKR.[K]	1xMet-loss [N-Term]; 1xKpyri_pc [K5]	P42677 [1-17]	1.246	0.913	8	2117.11
[R].IGFAEKVAAK.[V]	1xKpyri_pc [K6]	P07954 [287-296]	1.091	3.85	4	1291.72
[K].VFNDMKVR.[K]	1xKpyri_pc [K6]	P23528 [14-21]	0.802	13.789	14	1266.64
[K].QMADTGKLNTLLQR.[A]	1xKpyri_pc [K7]	Q00839 [545-558]	0.999	1.008	7	1846.96
[R].VKLPSGSK.[K]	1xKpyri_pc [K2]	P62917 [148-155]	1.147	21.955	18	1073.61
[K].TKDIVNGLR.[S]	1xKpyri_pc [K2]	P47756 [236-244]	0.945	0.795	7	1273.7
[R].LSYNTASNKTR.[L]	1xKpyri_pc [K9]	P49207 [11-21]	1.12	12.004	11	1512.76
[K].NIGLGFKTPK.[E]	1xKpyri_pc [K7]	P62280 [39-48]	0.251	4.672	5	1332.74
[K].SKMIYASSK.[D]	1xKpyri_pc [K2]	P23528 [113-121]; P60981 [113-121]	0.635	8.285	24	1272.64
[R].VELSNGEKR.[S]	1xKpyri_pc [K8]	P84103 [78-86]	0.945	3.077	11	1289.66
[K].ETQKSIYYITGESK.[E]	1xKpyri_pc [K4]	P08238 [478-491]	1.021	1.581	10	1904.94
[-].MSKAHPPELK.[K]	1xMet-loss+Acetyl [N-Term]; 1xKpyri_pc [K3]	P62308 [1-10]	1.479	4.848	26	1306.69
[K].AEKDNAEIR.[V]	1xKpyri_pc [K3]	Q99832 [248-256]	0.936	1.815	14	1303.64
[K].EAVLLLKK.[L]	1xKpyri_pc [K7]	P36578 [166-173]	1.052	3.072	12	1171.72
[R].VVLIGGKPDR.[V]	1xKpyri_pc [K7]	P61978 [192-201]	0.989	14.408	9	1311.75
[K].SFEEKVENLK.[S]	1xKpyri_pc [K5]	P55327 [176-185]	1.795	2.045	38	1480.74
[K].VTKDGVTVAK.[S]	1xKpyri_pc [K3]	P10809 [73-82]	1.046	10.196	30	1275.71
[K].SIVEKIQAK.[L]	1xKpyri_pc [K5]	O95197 [1014-1022]	1.015	5.299	18	1273.73
[R].SIAKEGFEK.[I]	1xKpyri_pc [K4]	P10809 [122-130]	0.939	8.009	2	1266.65
[K].FEGKPLLQR.[H]	1xKpyri_pc [K4]	Q9H3K6 [44-52]	0.809	4.399	44	1345.74
[R].TKDLIIEQR.[F]	1xKpyri_pc [K2]	Q00341 [509-517]	1.11	2.503	4	1373.75
[K].EGVFAKEVR.[T]	1xKpyri_pc [K6]	P49327 [668-676]	0.961	0.705	52	1292.67
[K].YYKVDENGK.[I]	1xKpyri_pc [K3]	P62979 [105-113]	0.942	7.047	55	1373.65
[K].KIQNDAGVR.[I]	1xKpyri_pc [K1]	Q96AE4 [300-308]; Q92945 [347-355]	1.131	3.673	14	1258.67
[K].KLNEILQAR.[G]	1xKpyri_pc [K1]	B5ME19 [333-341]	0.814	1.281	11	1342.76
[K].LEDGPKFLK.[S]	1xKpyri_pc [K6]	P68104 [387-395]	0.985	9.772	7	1304.7
[R].KAYGQALAK.[L]	1xKpyri_pc [K1]	P29401 [319-327]	0.677	22.287	4	1207.66
[R].KIFVGTK.[G]	1xKpyri_pc [K1]	P62701 [128-134]	1.039	11.003	60	1050.61
[R].KNGFVVLK.[G]	1xKpyri_pc [K1]	P63241 [27-34]	0.977	8.557	27	1162.67
[R].ILLQSKNAGAVIGK.[G]	1xKpyri_pc [K6]	P61978 [47-60]	0.995	3.092	9	1669.97
[K].LADKLYNLR.[D]	1xKpyri_pc [K4]	Q8N4P3 [120-128]	1.063	6.525	21	1363.75
[R].KPVTVHSR.[A]	1xKpyri_pc [K1]	P84098 [53-60]	0.686	1.866	6	1181.65
[K].KEGDLIAAQAR.[L]	1xKpyri_pc [K1]	P02545 [123-133]	0.769	6.277	3	1429.75
[R].KQSEGLTK.[E]	1xKpyri_pc [K1]	P51572 [214-221]	1.034	15.409	7	1148.61
[R].LKEEYQSLIR.[Y]	1xKpyri_pc [K2]	Q9Y3C8 [32-41]	0.895	10.756	6	1536.82
[R].KIDFLTK.[Q]	1xKpyri_pc [K1]	Q99471 [106-112]	1.053	8.732	29	1122.63
[K].LKESAPSR.[I]	1xKpyri_pc [K2]	Q8TC12 [164-171]	0.964	1.561	39	1145.61
[R].ILELDQFKGQQGQK.[R]	1xKpyri_pc [K8]	P12956 [116-129]	0.887	1.721	3	1889.99
[K].TVFAEHISDECK.[R]	1xCarbamidomethyl [C11]; 1xKpyri_pc [K12]	P39023 [104-115]	0.285	0.815	8	1693.76
[R].KVDWLTEK.[M]	1xKpyri_pc [K1]	P60842 [284-291]; P38919 [289-296]	0.961	1.91	22	1276.67
[K].VLLEKATR.[K]	1xKpyri_pc [K5]	Q9HB71 [15-22]	0.986	63.96	20	1187.69
[K].VIGVKSEGEIAR.[C]	1xKpyri_pc [K5]	P50395 [265-276]	1.191	2.549	19	1515.83
[K].TVPKTVDNFVALATGEK.[G]	1xKpyri_pc [K4]	P23284 [68-84]	0.931	7.251	3	2048.08
[K].KDGADFAK.[W]	1xKpyri_pc [K1]	P04075 [140-147]; P09972 [140-147]	1.144	1.058	58	1109.54
[R].KSLLVQTK.[R]	1xKpyri_pc [K1]	P39023 [349-356]	0.996	10.349	20	1174.69
[K].KSLDFYTR.[V]	1xKpyri_pc [K1]	Q04760 [44-51]	1.099	10.407	14	1287.65
[K].VAKYAGGTNDK.[G]	1xKpyri_pc [K3]	Q9NRV9 [62-72]	0.841	9.758	14	1381.69
[K].KYVIYIER.[V]	1xKpyri_pc [K1]	P61254 [77-84]; Q9UNX3 [77-84]	0.852	9.752	22	1341.73
[R].QIHKFEELNR.[T]	1xKpyri_pc [K4]	Q9Y262 [546-555]	0.932	4.694	7	1571.81
[K].LKSDEDEER.[V]	1xKpyri_pc [K2]	Q96AY3 [569-577]	1.274	2.106	9	1378.62
[K].KVHPAVVIR.[Q]	1xKpyri_pc [K1]	P62829 [75-83]	1.571	46.655	33	1276.76
[K].CKLNLPPYLTQEAR.[D]	1xCarbamidomethyl [C1]; 1xKpyri_pc [K2]	P23443 [308-321]	1.817	0.752	3	1961.01
[R].IITEGFEAAKEK.[A]	1xKpyri_pc [K]	P40227 [118-129]	0.987	3.773	12	1593.83
[K].AKMQASIEK.[G]	1xKpyri_pc [K2]	P06748 [249-257]	0.957	2.903	18	1263.65
[K].LKDELASTK.[Q]	1xKpyri_pc [K2]	P51572 [191-199]	0.82	12.969	18	1262.67
[KR].AKEFTNVYIK.[N]	1xKpyri_pc [K2]	P11940 [187-196]	0.972	1.415	6	1470.77
[K].YVDEASKK.[E]	1xKpyri_pc [K7]	P62249 [99-106]	0.834	6.776	4	1197.59
[K].IGIEIIKR.[T]	1xKpyri_pc [K7]	P10809 [463-470]	0.986	38.67	24	1199.73
[R].KHNMCGETEEEK.[I]	1xCarbamidomethyl [C5]; 1xKpyri_pc [K1]	P21266 [87-98]	1.151	0.596	54	1749.73
[K].IKEIAVTVK.[K]	1xKpyri_pc [K2]	Q99832 [136-144]	0.93	3.438	24	1258.75
[K].YKQALLQYK.[K]	1xKpyri_pc [K2]	Q02790 [286-294]	1.047	5.047	17	1412.77
[K].AAQEEYVKR.[A]	1xKpyri_pc [K8]	P04075 [323-331]	0.973	0.628	11	1351.68
[K].LKGEATVSFDDPPSAK.[A]	1xKpyri_pc [K2]	P35637 [333-348]	1.079	1.38	1	1919.95
[R].IGKPAPDFK.[A]	1xKpyri_pc [K3]	P32119 [8-16]	1.364	21.952	43	1230.66
[K].GILAADESTGSIAK.[R]	1xKpyri_pc [K14]	P04075 [29-42]	0.853	0.575	3	1590.81
[R].YASENVNKLLVGNK.[CS]	1xKpyri_pc [K8]	P62820 [112-125]; Q9H0U4 [109-122]	0.965	2.512	7	1806.95
[R].LEEVTGKLQVAR.[N]	1xKpyri_pc [K7]	O94906 [318-329]	1.864	4.419	9	1600.88
[K].NLVPGESVYGEKR.[V]	1xKpyri_pc [K12]	P22087 [110-122]	0.375	4.309	9	1705.87
[R].KGLYMANDLK.[L]	1xKpyri_pc [K1]	Q9Y2Q3 [62-71]	0.815	0.988	7	1410.72
[R].KTPCGEGSK.[T]	1xCarbamidomethyl [C4]; 1xKpyri_pc [K]	P60866 [67-75]	0.906	0.68	39	1221.57
[R].EKVFDVIIR.[C]	1xKpyri_pc [K2]	P12081 [74-82]	1.552	5.684	15	1376.77
[K].KGDLLLNR.[V]	1xKpyri_pc [K1]	Q15008 [372-379]	1.047	2.243	12	1186.67
[R].KLFGQESGPSAEK.[Y]	1xKpyri_pc [K1]	Q9BWH2 [68-80]	1.08	3.375	7	1635.81
[K].KIFVGGIK.[EG]	1xKpyri_pc [K1]	P51991 [127-134]; Q13151 [99-106]; P22626 [113-120]; P09651 [106-113]	0.92	19.941	25	1119.67
[R].VTQVDGHSSK.[N]	1xKpyri_pc [K10]	O43324 [79-88]	0.945	1.862	2	1315.64
[R].QLAQKYNCDK.[M]	1xCarbamidomethyl [C8]; 1xKpyri_pc [K5]	P62987 [84-93]	1.093	1.537	10	1525.72
[R].NKSAYFAEK.[L]	1xKpyri_pc [K2]	P09525 [245-253]	1.144	2.804	10	1315.64
[R].DKLEEILR.[G]	1xKpyri_pc [K2]	O15042 [540-547]	1.325	1.448	3	1273.69
[K].KVEDMMK.[K]	1xKpyri_pc [K1]	P13639 [252-258]	1.009	1.505	17	1138.54
[R].QEGRKDSLSVNEFK.[E]	1xKpyri_pc [K5]	Q99584 [26-39]	2.847	5.022	1	1894.94
[R].QSDLLVKLNR.[L]	1xKpyri_pc [K7]	Q06265 [95-104]	0.933	1.121	3	1443.81
[K].QAVGHEAIK.[L]	1xKpyri_pc [K9]	O75618 [283-291]	1.635	7.914	1	1210.63
[R].KELQAAGK.[S]	1xKpyri_pc [K1]	P06744 [447-454]	0.973	44.016	4	1102.6
[K].EGAKHFSGLEEAVYR.[N]	1xKpyri_pc [K4]	P50990 [17-31]	1.013	0.2	27	1950.95
[K].TKHMLPSGFR.[K]	1xOxidation [M4]; 1xKpyri_pc [K2]	P62910 [66-75]	1.693	85.471	21	1447.73
[R].KVGLIAAR.[R]	1xKpyri_pc [K1]	P62917 [234-241]	0.958	18.23	26	1085.66
[R].IFYDMKVR.[K]	1xKpyri_pc [K6]	P60981 [14-21]	1.085	18.645	42	1329.68
[R].KAMEAVAAQGK.[A]	1xKpyri_pc [K1]	P18669 [241-251]	1.066	3.617	4	1361.7
[R].KVLPLEEAYR.[F]	1xKpyri_pc [K1]	Q9H223 [35-44]	1.241	4.179	2	1475.8
[R].STVAQLVKR.[L]	1xKpyri_pc [K8]	P25705 [254-262]	1.231	2.081	2	1259.72
[K].KYAEVLR.[Y]	1xKpyri_pc [K1]	Q08752 [245-251]	1.07	1.589	24	1136.62
[K].KDETNVK.[M]	1xKpyri_pc [K1]	P07910 [244-250]	1.09	8.142	16	1091.55
[R].EADKSHPEQR.[E]	1xKpyri_pc [K4]	O14745 [139-148]	1.009	3.938	3	1454.68
[K].SLVKWESENK.[M]	1xKpyri_pc [K4]	P29373 [84-93]	0.751	32.073	12	1477.74
[K].SKMIYASSK.[D]	1xOxidation [M3]; 1xKpyri_pc [K2]	P23528 [113-121]; P60981 [113-121]	0.478	35.507	22	1288.64
[K].SDEKAAVAGK.[K]	1xKpyri_pc [K4]	P36578 [365-374]	0.92	12.524	27	1233.62
[K].SELVQKAK.[L]	1xKpyri_pc [K]	P31946 [6-13]	0.869	19.577	10	1160.64
[K].ELGITALHIKLR.[A]	1xKpyri_pc [K10]	P62263 [87-98]	1.002	3.006	7	1621.95
[K].EDLYLKPIQR.[T]	1xKpyri_pc [K6]	P13639 [440-449]	1.059	6.174	19	1532.82
[K].IASDGLKGR.[V]	1xKpyri_pc [K7]	P61247 [57-65]	0.206	7.624	8	1174.63
[K].ELKTDSSPNQAR.[A]	1xKpyri_pc [K3]	P26599 [135-146]	0.923	7.596	6	1603.78
[K].VDEVKSTIK.[F]	1xKpyri_pc [K5]	P62906 [148-156]	1.096	5.723	2	1276.69
[R].TVLDKAVQADGQVK.[E]	1xKpyri_pc [K5]	Q8WUM4 [497-510]	0.536	5.169	3	1729.92
[K].ALEAVFGKYGR.[I]	1xKpyri_pc [K8]	P38159 [23-33]	0.825	2.641	4	1468.77
[K].AKMQASIEK.[G]	1xOxidation [M3]; 1xKpyri_pc [K2]	P06748 [249-257]	1.156	5.478	7	1279.65
[R].VQLIKNGK.[K]	1xKpyri_pc [K5]	P62266 [72-79]	0.962	18.836	17	1157.68
[R].KGCVITISGR.[M]	1xCarbamidomethyl [C3]; 1xKpyri_pc [K1]	O00154 [286-295]	0.923	0.442	2	1348.72
[K].KLLDIVAR.[S]	1xKpyri_pc [K1]	Q12931 [96-103]	1.048	2.085	18	1185.71
[K].VTEKIPVR.[H]	1xKpyri_pc [K4]	Q00839 [340-347]	0.934	3.303	5	1199.69
[R].VVASDKETYELR.[Y]	1xKpyri_pc [K6]	Q6P5R6 [96-107]	1.204	3.364	7	1667.84
[R].AFLIEEQKIVVK.[V]	1xKpyri_pc [K8]	P49207 [94-105]	1.345	1.986	9	1674.96
[R].KLESTESR.[S]	1xKpyri_pc [K1]	P02545 [420-427]	0.91	64.161	2	1207.61
[K].VVSETNDTKVLRH.[-]	1xKpyri_pc [K9]	P05783 [418-430]	1.026	0.371	15	1755.91
[K].KLEGGGER.[R]	1xKpyri_pc [K1]	Q92522 [120-127]	0.186	3.009	4	1103.56
[K].KGYNVNDEK.[A]	1xKpyri_pc [K1]	P80723 [10-18]	0.829	4.489	2	1324.63
[R].YESLKGVDPK.[F]	1xKpyri_pc [K5]	P47914 [29-38]	1.037	6.294	4	1393.71
[K].AASGEAKPK.[AV]	1xKpyri_pc [K7]	P16401 [114-122]; P10412 [111-119]; P16403 [111-119]	0.763	4.42	3	1116.58
[K].YHPDKNPNEGEK.[F]	1xKpyri_pc [K5]	P31689 [33-44]	1.781	11.264	3	1685.77
[K].KLEAAEER.[R]	1xKpyri_pc [K1]	P16949 [53-60]; Q93045 [87-94]	1.381	94.685	19	1203.61
[R].KLAEQFPR.[Q]	1xKpyri_pc [K1]	Q96K17 [115-122]	1.025	27.053	3	1246.67
[R].KIAEGAQQGDPLSR.[Y]	1xKpyri_pc [K1]	Q9UJ70 [219-232]	0.948	1.701	5	1727.88
[K].AAGAGKVTK.[S]	1xKpyri_pc [K6]	P68104 [445-453]	1.612	8.809	11	1060.59
[K].KFYEAFSK.[N]	1xKpyri_pc [K1]	P08238 [428-435]	1.086	5.945	4	1277.63
[K].VLEQLTGQTPVFSK.[A]	1xKpyri_pc [K14]	P62913 [39-52]	1.019	4.261	2	1804.96
[R].VLEAKELALQPK.[D]	1xKpyri_pc [K5]	P41250 [104-115]	1.305	4.589	4	1596.91
[R].VIDYAVKIR.[V]	1xKpyri_pc [K7]	P38117 [13-21]	0.455	10.696	9	1334.76
[R].DEKNYYQDTPK.[Q]	1xKpyri_pc [K3]	Q9Y3C1 [136-146]	0.962	1.78	5	1658.74
[K].VAEKLEALSVK.[E]	1xKpyri_pc [K4]	P43487 [180-190]	1.098	20.66	10	1444.82
[R].CVDKSWIPEGVVR.[S]	1xCarbamidomethyl [C1]; 1xKpyri_pc [K4]	P51159 [188-200]	0.859	1.762	7	1802.9
[K].KSDVEAIFSK.[Y]	1xKpyri_pc [K1]	P07910 [30-39]	0.924	0.788	15	1381.71
[R].KSDGIYIINLKR.[T]	1xKpyri_pc [K11]	P08865 [42-53]	1.304	35.354	7	1677.94
[R].IGVLDEGKMK.[L]	1xKpyri_pc [K8]	P46781 [84-93]	1.253	16.431	9	1347.71
[R].KQVEVFR.[Q]	1xKpyri_pc [K1]	Q9UL46 [15-21]	1.173	8.745	17	1163.63
[K].VDQEVKLK.[V]	1xKpyri_pc [K6]	P61289 [7-14]	1.013	5.598	7	1216.67
[R].KQSEPFFK.[A]	1xKpyri_pc [K1]	P11413 [82-89]	0.746	1.719	22	1268.64
[K].DGVTVAKSIDLK.[D]	1xKpyri_pc [K7]	P10809 [76-87]	1.127	3.959	2	1503.82
[K].AVTKYTSSK.[-]	1xKpyri_pc [K4]	Q16778 [118-126]; Q5QNW6 [118-126]; P58876 [118-126]	1.033	6.499	30	1242.65
[K].KFAETQPK.[K]	1xKpyri_pc [K1]	P26641 [220-227]	1.115	3.207	55	1206.63
[K].AVAASKER.[NS]	1xKpyri_pc [K6]	P16401 [50-57]; P10412 [47-54]; P16403 [47-54]	1.091	4.809	17	1089.58
[K].VFDVTKGR.[K]	1xKpyri_pc [K6]	O00264 [97-104]	0.238	10.965	24	1179.63
[R].KPATSYVR.[T]	1xKpyri_pc [K1]	P46779 [72-79]	1.332	70.629	12	1179.63
[K].KFGDMSYSIR.[H]	1xOxidation [M5]; 1xKpyri_pc [K1]	Q16890 [124-133]	1.154	3.013	2	1477.69
[K].VHLDKAQQNNVEHK.[V]	1xKpyri_pc [K5]	P62081 [156-169]	1.422	16.402	16	1917.97
[K].ASAPESGLLSKV.[-]	1xKpyri_pc [K11]	Q96CN7 [287-298]	1.029	0.117	2	1416.75
[K].KISTVVSSK.[E]	1xKpyri_pc [K1]	P37108 [66-74]	1.255	7.338	3	1206.68
[K].ANAEKTSGSNVK.[I]	1xKpyri_pc [K5]	P56381 [33-44]	1.107	15.422	10	1463.72
[K].VEKLKPLEVELR.[R]	1xKpyri_pc [K]	P49755 [141-152]	1.532	10.685	7	1710.99
[R].KYDDVTEK.[V]	1xKpyri_pc [K1]	P51572 [72-79]	1.246	2.153	13	1255.6
[K].KKHPDASVNFSEFSK.[K]	1xKpyri_pc [K2]	P09429 [29-43]	1.475	3.481	4	1978.98
[K].LIEKLDIK.[L]	1xKpyri_pc [K4]	P13639 [315-322]	0.962	7.019	3	1229.73
[K].EQIVPKPEEEVAQK.[K]	1xKpyri_pc [K6]	P18621 [154-167]	0.524	6.482	4	1881.97
[-].MAAVDLEKLR.[A]	1xMet-loss+Acetyl [N-Term]; 1xKpyri_pc [K8]	P17858 [1-10]	1.002	0.835	6	1314.72
[R].GYVKEQFAWR.[H]	1xKpyri_pc [K4]	P46783 [56-65]	0.786	1.099	11	1541.76
[R].ILKSPEIQR.[A]	1xKpyri_pc [K3]	P36578 [292-300]	0.935	12.21	31	1341.76
[K].LLKEGSSNQR.[V]	1xKpyri_pc [K3]	Q04637 [1450-1459]	1.061	2.985	20	1389.72
[R].ILGPGLNKAGK.[F]	1xKpyri_pc [K8]	P62906 [123-133]	0.873	13.418	7	1325.77
[K].HGEVCPAGWKPGSDTIKPDVQK.[S]	1xCarbamidomethyl [C5]; 1xKpyri_pc [K]	Q06830 [169-190]	0.881	2.923	7	2664.3
[-].MESGAYGAAK.[A]	1xAcetyl [N-Term]; 1xKpyri_pc [K10]	O43760 [1-10]	0.975	2.216	8	1284.57
[-].MESYHKPDQQK.[L]	1xAcetyl [N-Term]; 1xKpyri_pc [K6]	P29401 [1-11]	1.148	0.368	3	1690.76
[K].MKEGENNKPR.[E]	1xKpyri_pc [K2]	P45973 [73-82]	5.729	27.563	1	1460.71
[R].HNGTGGKSIYGEK.[F]	1xKpyri_pc [K7]	P62937 [70-82]	0.946	4.998	11	1605.78
[-].MSILKIHAR.[E]	1xMet-loss+Acetyl [N-Term]; 1xKpyri_pc [K5]	P06733 [1-9]	0.958	3.131	46	1237.72
[K].IKTVELQGK.[K]	1xKpyri_pc [K2]	P61026 [48-56]	1.09	3.829	8	1273.73
[K].KKEELLK.[Q]	1xKpyri_pc [K]	P42766 [13-19]	1.206	2.9	37	1145.67
[-].MPLAKDLLHPSPEEEK.[R]	1xMet-loss [N-Term]; 1xKpyri_pc [K5]	P42677 [1-16]	0.977	0.483	19	1961.01
[K].GIVEFASKPAAR.[K]	1xKpyri_pc [K8]	P23246 [414-425]	1.151	0.907	10	1503.81
[K].MVEKDQDGGR.[K]	1xOxidation [M1]; 1xKpyri_pc [K4]	P39019 [112-121]	0.766	11.668	3	1408.63
[R].KACQIFVR.[N]	1xCarbamidomethyl [C3]; 1xKpyri_pc [K1]	P52272 [651-658]	0.594	4.823	6	1279.67
[R].NFLGEKYIR.[R]	1xKpyri_pc [K6]	P32969 [116-124]	0.599	21.924	10	1397.73
[R].LPKEVQLE.[-]	1xKpyri_pc [K3]	Q9BS40 [215-222]	0.951	1.433	3	1213.66
[K].GFGFIKLESR.[A]	1xKpyri_pc [K6]	P23246 [333-342]	1.162	0.517	11	1411.75
[K].NDHAEKVAEK.[L]	1xKpyri_pc [K6]	P43487 [174-183]	1.189	52.531	8	1398.68
[R].IQILEGWKK.[R]	1xKpyri_pc [K8]	P15559 [202-210]	1.003	4.676	7	1372.77
[K].GKGEQIAR.[E]	1xKpyri_pc [K2]	P61026 [135-142]	1.082	2.075	21	1116.59
[K].GKFEDMAK.[A]	1xKpyri_pc [K2]	P09429 [58-65]	0.901	1.208	12	1183.56
[R].DGKLVSESSDVLPK.[-]	1xKpyri_pc [K3]	P05787 [470-483]	1.137	3.559	8	1731.89
[K].LIDTVKDPVSK.[T]	1xKpyri_pc [K6]	P19784 [98-108]	0.971	2.894	14	1472.81
[K].KSYTTPK.[K]	1xKpyri_pc [K1]	P62979 [83-89]	1.06	25.371	5	1082.56
[R].YHPDKNKEPGAEEK.[F]	1xKpyri_pc [K]	P25685 [31-44]	1.296	11.868	5	1899.9
[R].KALDIAENEMPGLMR.[M]	2xOxidation [M10; M14]; 1xKpyri_pc [K1]	P23526 [20-34]	0.862	0.381	1	1977.95
[R].FLQEKGPSVDWGK.[I]	1xKpyri_pc [K5]	Q16851 [65-77]	1.138	2.043	12	1748.88
[truncated: 318 more rows]

## Sheet: Table S8-live cells
386 KP2 labeled-lysine sites in MCF-7 live cells
[truncated: 387 more rows]
